# Supplementary material
Source: HighWire-hosted journal article supplement (doi:10.1101/rna.079687.123)
Supplement: Supplemental_Data_1_.xlsx [file Supplemental_Data_1_.xlsx]

## Sheet: 16S
Position: 1
Aln	A	G	C	U	gap	Seq	Con
T	15.67	2.04	7.29	18.69	56.31	2552	-0.854
3	20.83	2.7	8.99	32.68	34.8	1368	-0.678
B	31.82	4.2	13.3	50.57	0.11	880	0.384
A	0	0	100	0	0	2	2
C	25	11	49	8	7	100	-0.055
E	1.03	0	0.82	0.41	97.74	486	-0.145
M	8.33	0.37	1.28	2.01	88.01	1093	-0.445
Position: 2
Aln	A	G	C	U	gap	Seq	Con
T	20.75	4.74	7.88	16.29	50.34	2805	-0.9
3	30.37	6.91	11.48	23.09	28.15	1620	-0.713
B	42.57	9.73	15.64	31.89	0.17	1151	0.185
A	0	0	100	0	0	2	2
C	13.73	0	31.37	48.04	6.86	102	0.171
E	0.43	0	0.86	1.5	97.22	467	-0.167
M	6.96	1.92	0.27	3.21	87.64	1092	-0.479
Position: 3
Aln	A	G	C	U	gap	Seq	Con
T	32.28	3.03	4.44	12.82	47.43	2971	-0.718
3	47.25	4.43	4.55	18.24	25.53	1782	-0.374
B	63.7	5.71	5.78	24.66	0.15	1314	0.597
A	0	0	100	0	0	2	2
C	16.19	2.86	48.57	25.71	6.67	105	0.025
E	1.07	0.86	0.64	0.21	97.21	466	-0.179
M	9.24	0.73	0	2.65	87.37	1093	-0.426
Position: 4
Aln	A	G	C	U	gap	Seq	Con
T	21.81	3.55	11.79	16.3	46.55	3012	-0.885
3	29.7	4.44	15.95	25.21	24.71	1825	-0.636
B	39.7	5.39	21.11	33.73	0.07	1355	0.232
A	0	0	33.33	66.67	0	3	1.082
C	69.52	20.95	0.95	1.9	6.67	105	0.596
E	0.86	1.71	0.86	0.21	96.36	467	-0.216
M	3.85	0.37	5.77	2.75	87.26	1091	-0.507
Position: 5
Aln	A	G	C	U	gap	Seq	Con
T	8.98	1.21	14.7	33.3	41.81	3231	-0.686
3	8.6	1.36	21.66	47.6	20.79	2059	-0.263
B	12.42	1.75	14.76	70.93	0.15	1369	0.748
A	66.67	33.33	0	0	0	6	1.082
C	5.61	1.87	22.43	63.55	6.54	107	0.372
E	0.44	0.29	35.67	1.32	62.28	684	-0.343
M	9.96	0.84	0.47	2.7	86.03	1074	-0.473
Position: 6
Aln	A	G	C	U	gap	Seq	Con
T	20.63	34.49	11.54	23.01	10.33	2981	-0.392
3	23.19	42.75	4.48	23.87	5.71	2208	-0.057
B	1.88	67.75	2.31	27.98	0.07	1383	0.863
A	97.83	0	0	2.17	0	92	1.849
C	19.44	62.04	0.93	11.11	6.48	108	0.313
E	54.02	0.95	9.14	18.83	17.05	733	-0.089
M	12.29	2.55	36.73	22.34	26.09	667	-0.548
Position: 7
Aln	A	G	C	U	gap	Seq	Con
T	54.62	35.78	2.21	5.36	2.03	3206	0.49
3	46.76	43.15	2.42	5.78	1.89	2438	0.45
B	29.83	66.3	1.87	1.81	0.19	1549	0.853
A	7.86	3.57	11.43	77.14	0	140	0.894
C	11.11	74.07	2.78	4.63	7.41	108	0.552
E	89.05	2.67	1.87	0.67	5.74	749	1.204
M	90.79	2.27	1.36	4.08	1.51	662	1.355
Position: 8
Aln	A	G	C	U	gap	Seq	Con
T	68.74	1.36	20.19	8.32	1.39	3522	0.666
3	66.05	0.73	23.71	7.84	1.68	2742	0.64
B	97.75	1.04	0.66	0.38	0.16	1822	1.802
A	1.37	0	0.68	97.95	0	146	1.837
C	83.47	0	13.22	3.31	0	121	1.234
E	3.62	0.13	82.3	8.4	5.56	774	0.94
M	77.16	4.54	6.81	11.2	0.3	661	0.86
Position: 9
Aln	A	G	C	U	gap	Seq	Con
T	16.3	57.51	25.1	0.49	0.6	3669	0.52
3	0.87	66.46	31.64	0.38	0.66	2886	0.932
B	1.23	98.36	0	0.36	0.05	1949	1.863
A	0	0	99.33	0.67	0	150	1.942
C	1.63	97.56	0.81	0	0	123	1.812
E	0.13	0.13	97.08	0.38	2.29	787	1.733
M	86.71	10.88	1.06	1.06	0.3	662	1.303
Position: 10
Aln	A	G	C	U	gap	Seq	Con
T	58.56	16.56	3.71	20.85	0.32	3745	0.437
3	66.99	1.99	4.49	26.22	0.3	2960	0.761
B	96.28	2.87	0.64	0.15	0.05	2018	1.733
A	0	0	73.83	26.17	0	149	1.171
C	100	0	0	0	0	124	2
E	5.04	0.13	1.26	92.56	1.01	793	1.501
M	13.42	84.62	0.9	0.75	0.3	663	1.261
Position: 11
Aln	A	G	C	U	gap	Seq	Con
T	5.1	93.9	0.13	0.55	0.32	3802	1.609
3	0.46	99.1	0.03	0.1	0.3	3013	1.906
B	0.68	99.08	0	0.1	0.15	2055	1.911
A	0	100	0	0	0	152	2
C	0.8	99.2	0	0	0	125	1.933
E	0	99.01	0.12	0.12	0.74	806	1.894
M	26.88	69.52	0.6	2.7	0.3	666	0.91
Position: 12
Aln	A	G	C	U	gap	Seq	Con
T	1.49	23.41	5.52	69.27	0.31	3892	0.79
3	1.58	29.33	0.35	68.44	0.29	3099	0.953
B	0.23	0.28	0.47	98.78	0.23	2134	1.877
A	0	91.33	0	8.67	0	150	1.575
C	0	0.79	0	99.21	0	126	1.933
E	5.4	93.99	0.12	0	0.49	815	1.629
M	1.35	0.15	30.49	67.71	0.3	669	0.968
Position: 13
Aln	A	G	C	U	gap	Seq	Con
T	1.61	0.18	0.2	97.67	0.33	3912	1.802
3	0.16	0.1	0.1	99.39	0.26	3118	1.93
B	0.23	0.14	0.09	99.49	0.05	2148	1.944
A	0	0	0	100	0	154	2
C	0	0	0	100	0	126	2
E	0	0	0.12	99.02	0.86	816	1.898
M	8.66	0.6	0.75	89.4	0.6	670	1.397
Position: 14
Aln	A	G	C	U	gap	Seq	Con
T	0.18	0.4	1.75	97.27	0.4	3954	1.771
3	0.16	0.5	1.32	97.67	0.35	3171	1.796
B	0.23	0.23	1.64	97.76	0.14	2189	1.815
A	0	0	0.65	99.35	0	154	1.943
C	0	0	22.61	76.52	0.87	115	1.143
E	0	1.33	0.6	97.22	0.85	827	1.758
M	0.3	0	0.15	99.1	0.45	670	1.904
Position: 15
Aln	A	G	C	U	gap	Seq	Con
T	3.94	95.34	0.03	0.45	0.25	3989	1.686
3	0.16	99.47	0.03	0.16	0.19	3195	1.939
B	0.23	99.41	0.05	0.23	0.09	2211	1.936
A	0	100	0	0	0	154	2
C	0	100	0	0	0	127	2
E	0	99.52	0	0	0.48	830	1.946
M	22.72	74.44	0	2.39	0.45	669	1.024
Position: 16
Aln	A	G	C	U	gap	Seq	Con
T	85.18	14.29	0.1	0.12	0.32	4088	1.347
3	99.39	0.18	0.09	0.06	0.27	3291	1.93
B	99.44	0.26	0.09	0.09	0.13	2304	1.937
A	100	0	0	0	0	154	2
C	100	0	0	0	0	127	2
E	99.16	0	0.12	0	0.72	833	1.911
M	12.95	86.01	0.15	0.45	0.45	672	1.339
Position: 17
Aln	A	G	C	U	gap	Seq	Con
T	0.17	0.12	0.22	99.27	0.22	4108	1.919
3	0.06	0.09	0.15	99.52	0.18	3304	1.943
B	0.04	0.13	0.09	99.61	0.13	2317	1.953
A	0	0	0	100	0	155	2
C	0	0	0	100	0	128	2
E	0.12	0	0.36	99.16	0.36	832	1.911
M	0.74	0.29	0.59	98.08	0.29	678	1.821
Position: 18
Aln	A	G	C	U	gap	Seq	Con
T	0.29	0.63	94.18	4.74	0.17	4139	1.621
3	0.15	0.06	94.72	4.95	0.12	3331	1.677
B	0.21	0.09	95.37	4.25	0.09	2332	1.703
A	0	0	99.35	0.65	0	155	1.944
C	0.78	0	99.22	0	0	129	1.935
E	0	0	92.06	7.7	0.24	844	1.58
M	0.88	3.52	90.31	4.99	0.29	681	1.39
Position: 19
Aln	A	G	C	U	gap	Seq	Con
T	9.91	0.17	88.17	1.59	0.17	4159	1.38
3	11.31	0.06	87.5	1.04	0.09	3351	1.39
B	16.13	0.09	83.06	0.64	0.09	2350	1.287
A	0	0	100	0	0	156	2
C	11.72	0	87.5	0	0.78	128	1.399
E	0	0	97.51	2.37	0.12	845	1.823
M	2.64	0.73	91.79	4.55	0.29	682	1.463
Position: 20
Aln	A	G	C	U	gap	Seq	Con
T	0.14	0.09	2.54	97.01	0.21	4248	1.777
3	0.06	0.12	0.79	98.89	0.15	3429	1.895
B	0.08	0.16	0.21	99.42	0.12	2430	1.935
A	0	0	14.19	85.81	0	155	1.411
C	0	0	0	100	0	129	2
E	0	0	0	99.76	0.24	844	1.971
M	0.58	0	11.71	87.28	0.43	692	1.381
Position: 21
Aln	A	G	C	U	gap	Seq	Con
T	8.48	90.72	0.02	0.4	0.38	4258	1.498
3	0.2	99.19	0.03	0.26	0.32	3441	1.911
B	0.25	98.93	0.04	0.37	0.41	2439	1.888
A	0	100	0	0	0	157	2
C	0.78	94.57	0	4.65	0	129	1.664
E	0.12	99.76	0	0	0.12	845	1.971
M	51.16	47.54	0	0.72	0.58	690	0.889
Position: 22
Aln	A	G	C	U	gap	Seq	Con
T	5.6	71.07	22.78	0.35	0.21	4341	0.88
3	0.23	71.22	28.1	0.28	0.17	3520	1.074
B	0.28	99.2	0.2	0.16	0.16	2514	1.914
A	0.64	8.28	91.08	0	0	157	1.533
C	0	100	0	0	0	130	2
E	0	0	99.06	0.71	0.24	849	1.911
M	33.91	65.08	0	0.72	0.29	693	0.986
Position: 23
Aln	A	G	C	U	gap	Seq	Con
T	0.43	0.11	98.23	1.07	0.16	4411	1.842
3	0.08	0.06	99.58	0.17	0.11	3587	1.951
B	0.12	0.08	99.46	0.23	0.12	2576	1.939
A	0	0	100	0	0	158	2
C	0	0	100	0	0	132	2
E	0	0	99.88	0	0.12	853	1.985
M	2.31	0.43	91.07	5.91	0.29	694	1.447
Position: 24
Aln	A	G	C	U	gap	Seq	Con
T	19.04	3.57	13.02	64.2	0.16	4453	0.561
3	23.35	4.25	0.08	72.21	0.11	3627	0.956
B	0.08	0.69	0.12	99	0.12	2602	1.903
A	23.67	76.33	0	0	0	169	1.211
C	0	0	0	100	0	132	2
E	94.04	0.82	0	5.02	0.12	856	1.629
M	0.14	0.72	82.9	15.95	0.29	696	1.259
Position: 25
Aln	A	G	C	U	gap	Seq	Con
T	0.31	23.18	62.24	14.12	0.16	4470	0.643
3	0.14	28.32	70.41	1.02	0.11	3640	1.035
B	0.11	0.15	98.2	1.42	0.11	2609	1.848
A	0	100	0	0	0	174	2
C	0	0	100	0	0	136	2
E	0.23	99.53	0.12	0	0.12	857	1.948
M	1.29	0.72	11.93	85.78	0.29	696	1.282
Position: 26
Aln	A	G	C	U	gap	Seq	Con
T	67.24	0.22	0.67	31.54	0.33	4502	0.988
3	77.45	0.11	0.38	21.95	0.11	3668	1.18
B	99.7	0.04	0.11	0.04	0.11	2634	1.962
A	95.35	0.58	2.33	1.74	0	172	1.663
C	98.53	0	1.47	0	0	136	1.889
E	5.92	0.23	0.81	92.92	0.12	862	1.57
M	7.86	0.86	2	87.86	1.43	700	1.26
Position: 27
Aln	A	G	C	U	gap	Seq	Con
T	21.38	71.81	3.71	2.87	0.24	4636	0.832
3	17.11	79.42	2.7	0.56	0.21	3775	1.095
B	0.22	99.3	0.15	0.11	0.22	2707	1.922
A	3.89	65.56	30	0	0.56	180	0.845
C	1.45	98.55	0	0	0	138	1.891
E	71.28	21.62	4.95	2.03	0.11	888	0.832
M	47.31	26.9	9.66	15.86	0.28	725	0.204
Position: 28
Aln	A	G	C	U	gap	Seq	Con
T	34.16	53.93	8.64	3.02	0.25	5138	0.506
3	36.47	61.31	1.8	0.19	0.23	4275	0.89
B	47.98	51.52	0.31	0.03	0.16	3197	0.951
A	1.09	67.39	29.89	0	1.63	184	0.895
C	5.76	94.24	0	0	0	139	1.682
E	2.57	95.08	1.34	0.78	0.22	894	1.632
M	25.9	2.62	50.55	20.66	0.28	726	0.361
Position: 29
Aln	A	G	C	U	gap	Seq	Con
T	47.79	8.28	4	38.86	1.07	5252	0.386
3	50.51	8.23	2.71	37.34	1.21	4389	0.433
B	66.91	10.53	0.21	22.26	0.09	3306	0.758
A	1.6	3.74	58.82	34.22	1.6	187	0.619
C	93.57	5	0	1.43	0	140	1.607
E	0.22	0.67	0.22	93.64	5.25	896	1.496
M	22.34	9.24	12.55	55.59	0.28	725	0.324
Position: 30
Aln	A	G	C	U	gap	Seq	Con
T	21.86	8.25	34.28	35.4	0.21	5344	0.141
3	19.62	1.99	40.72	37.49	0.18	4479	0.348
B	0.18	0.32	50.9	48.51	0.09	3387	0.944
A	1.06	29.79	50	19.15	0	188	0.453
C	1.43	4.29	2.14	92.14	0	140	1.49
E	96.35	2.43	0.66	0	0.55	904	1.717
M	39.89	47.59	0.69	11.55	0.28	727	0.523
Position: 31
Aln	A	G	C	U	gap	Seq	Con
T	0.96	57.99	0.25	2.75	38.05	5606	0.024
3	0.9	68.59	0.32	3.2	27	4441	0.331
B	1.23	93.84	0.43	4.38	0.12	3245	1.59
A	0	0	0	0	100	189	--
C	1.42	96.45	0	2.13	0	141	1.744
E	0	0.1	0	0	99.9	1007	-0.009
M	1.17	6.71	0	0.88	91.25	1028	-0.342
Position: 32
Aln	A	G	C	U	gap	Seq	Con
T	71.11	1.19	0.31	27.06	0.33	5448	1.004
3	79.46	1.38	0.15	18.71	0.31	4581	1.153
B	98.94	0.4	0.09	0.43	0.14	3491	1.894
A	98.4	1.06	0.53	0	0	188	1.867
C	100	0	0	0	0	141	2
E	0.11	5.21	0.33	93.35	1	902	1.561
M	12.77	0.27	1.37	85.16	0.41	728	1.274
Position: 33
Aln	A	G	C	U	gap	Seq	Con
T	84.15	0.46	5.65	9.41	0.33	5452	1.166
3	95.2	0.24	3.14	1.18	0.24	4587	1.654
B	99.63	0.23	0.06	0.03	0.06	3491	1.958
A	0	0	72.82	27.18	0	195	1.156
C	97.87	0	0.71	1.42	0	141	1.832
E	98.67	0.33	0	0	1	901	1.867
M	11.68	1.92	22.39	63.19	0.82	728	0.553
Position: 34
Aln	A	G	C	U	gap	Seq	Con
T	9.95	1.62	70.46	17.64	0.32	5545	0.741
3	0.26	0.38	78.83	20.25	0.28	4677	1.181
B	0.28	0.31	98.86	0.42	0.14	3583	1.885
A	0	0	29.23	70.77	0	195	1.128
C	0	0	99.3	0.7	0	142	1.94
E	0.22	0.78	9.79	88.32	0.89	899	1.361
M	74.25	9.86	11.23	4.11	0.55	730	0.756
Position: 35
Aln	A	G	C	U	gap	Seq	Con
T	5.47	93.22	0.46	0.59	0.25	5594	1.57
3	0.19	98.92	0.4	0.25	0.23	4706	1.888
B	0.22	99.08	0.42	0.19	0.08	3598	1.907
A	0	98.47	1.53	0	0	196	1.886
C	0	100	0	0	0	142	2
E	0.11	98.36	0.11	0.55	0.88	912	1.836
M	40.27	55.73	0.93	2.8	0.27	750	0.766
Position: 36
Aln	A	G	C	U	gap	Seq	Con
T	0.19	0.23	89.31	9.92	0.35	5695	1.45
3	0.1	0.23	97.27	2.05	0.35	4791	1.78
B	0.14	0.3	96.71	2.64	0.22	3679	1.753
A	0	0	100	0	0	196	2
C	0	0.63	99.37	0	0	158	1.945
E	0	0	98.91	0.11	0.98	916	1.888
M	1.07	0.13	36	62.53	0.27	750	0.935
Position: 37
Aln	A	G	C	U	gap	Seq	Con
T	0.29	0.2	0.88	98.39	0.24	5904	1.849
3	0.1	0.1	0.18	99.42	0.2	4997	1.933
B	0.13	0.13	0.21	99.48	0.05	3883	1.943
A	0	0	0	100	0	195	2
C	1.27	0.63	0.63	97.47	0	158	1.792
E	0	0	0.11	99.02	0.87	919	1.898
M	1.33	0.8	5.58	91.9	0.4	753	1.478
Position: 38
Aln	A	G	C	U	gap	Seq	Con
T	12.19	65.88	4.24	16.91	0.78	5897	0.536
3	9.64	72.62	1.26	16.18	0.3	4989	0.803
B	6.22	93.31	0.13	0.21	0.13	3874	1.612
A	98.98	0	0	1.02	0	196	1.918
C	5.7	93.04	0	1.27	0	158	1.588
E	5.01	0.87	6.31	86.72	1.09	919	1.202
M	30.37	15.25	24.8	25.33	4.24	754	-0.215
Position: 39
Aln	A	G	C	U	gap	Seq	Con
T	1.71	82.72	1.13	14.16	0.29	5955	1.171
3	0.79	93.15	0.2	5.61	0.26	5049	1.571
B	0.74	97.69	0.2	1.27	0.1	3934	1.804
A	0	0	0	100	0	196	2
C	0.64	98.73	0	0.64	0	157	1.889
E	1.2	93.58	0.22	4.03	0.98	919	1.543
M	8.1	9.03	7.57	74.9	0.4	753	0.759
Position: 40
Aln	A	G	C	U	gap	Seq	Con
T	3.38	0.78	72.14	23.49	0.2	6006	0.927
3	0.33	0.65	79.72	19.12	0.18	5099	1.189
B	0.18	0.18	98.72	0.9	0.03	3983	1.885
A	2.54	9.14	61.93	26.4	0	197	0.615
C	2.53	0	96.2	1.27	0	158	1.732
E	0.54	0.87	1.2	96.52	0.87	919	1.697
M	24.17	1.86	15.41	58.3	0.27	753	0.5
Position: 41
Aln	A	G	C	U	gap	Seq	Con
T	9.24	72.17	15.13	3.15	0.32	6029	0.741
3	2.15	78.02	16.93	2.6	0.31	5122	0.999
B	2.25	95.03	0.1	2.45	0.17	4006	1.647
A	7.14	91.33	1.53	0	0	196	1.516
C	5.1	93.63	0	1.27	0	157	1.612
E	0.65	1.09	93.48	3.8	0.98	920	1.526
M	58.22	27.59	5.97	7.96	0.27	754	0.472
Position: 42
Aln	A	G	C	U	gap	Seq	Con
T	4.2	72.94	6	16.56	0.3	6050	0.772
3	2.01	79.65	0.64	17.43	0.27	5134	1.111
B	2.47	97.04	0.22	0.07	0.2	4014	1.777
A	2.02	97.98	0	0	0	198	1.857
C	3.8	95.57	0	0.63	0	158	1.712
E	0	0	2.6	96.75	0.65	922	1.757
M	19.29	22.7	43.7	13.91	0.39	762	0.099
Position: 43
Aln	A	G	C	U	gap	Seq	Con
T	3.09	3.38	76.74	16.6	0.2	6061	0.935
3	2.45	3.54	85.24	8.59	0.17	5144	1.178
B	1.34	1.07	89.31	8.21	0.07	4021	1.395
A	20.1	69.85	0	10.05	0	199	0.84
C	0.63	0.63	58.49	40.25	0	159	0.927
E	3.46	0	85.93	9.96	0.65	924	1.252
M	8.14	2.89	22.7	66.01	0.26	762	0.649
Position: 44
Aln	A	G	C	U	gap	Seq	Con
T	56.34	38.68	1.33	3.39	0.26	6186	0.728
3	54.24	43.86	0.36	1.29	0.25	5267	0.863
B	47.41	52.2	0.19	0.05	0.15	4134	0.961
A	15	76	2	7	0	200	0.907
C	91.82	6.92	0.63	0.63	0	159	1.528
E	92.93	0	0.75	5.57	0.75	933	1.549
M	63.09	9.42	8.12	19.11	0.26	764	0.482
Position: 45
Aln	A	G	C	U	gap	Seq	Con
T	22.19	24.25	4.71	48.64	0.21	6215	0.286
3	18.02	23.96	5.35	52.5	0.17	5293	0.328
B	0.79	28.75	5.27	65	0.19	4157	0.779
A	15	17.5	30.5	37	0	200	0.096
C	0	0.63	0	99.37	0	159	1.945
E	95.19	4.06	0.32	0.32	0.11	936	1.679
M	55.41	31.03	1.3	11.86	0.39	767	0.519
Position: 46
Aln	A	G	C	U	gap	Seq	Con
T	20.83	76.21	2.31	0.42	0.23	6222	1.047
3	14.36	82.68	2.53	0.23	0.21	5300	1.194
B	0.19	99.35	0.14	0.12	0.19	4160	1.927
A	6.44	26.73	63.37	3.47	0	202	0.651
C	1.89	98.11	0	0	0	159	1.865
E	78.89	20.79	0	0	0.32	938	1.226
M	69.95	26.68	1.3	1.81	0.26	772	0.917
Position: 47
Aln	A	G	C	U	gap	Seq	Con
T	3.24	19.51	70.72	6.29	0.24	6232	0.749
3	0.08	22.62	73.2	3.9	0.21	5309	0.973
B	0.05	2.25	93.14	4.32	0.24	4170	1.555
A	0	94.06	0.99	4.95	0	202	1.636
C	0	0.63	98.74	0	0.63	159	1.877
E	0.21	97.87	0	1.81	0.11	937	1.833
M	25.61	1.81	47.09	25.23	0.26	773	0.352
Position: 48
Aln	A	G	C	U	gap	Seq	Con
T	5.41	0.33	42.89	51.15	0.22	6270	0.702
3	1.44	0.32	48.14	49.91	0.19	5330	0.856
B	1.69	0.41	50.89	46.79	0.21	4191	0.836
A	2.97	0	59.9	37.13	0	202	0.876
C	5.66	0	17.61	76.73	0	159	1.031
E	0	0	33.3	66.6	0.11	937	1.068
M	33.29	0.51	12.03	53.8	0.38	790	0.546
Position: 49
Aln	A	G	C	U	gap	Seq	Con
T	0.3	0.21	0.45	98.87	0.18	6274	1.886
3	0.22	0.06	0.06	99.53	0.13	5334	1.946
B	0.21	0	0.07	99.57	0.14	4193	1.951
A	0	0	0	100	0	202	2
C	0.63	0	0	98.74	0.63	159	1.877
E	0.32	0.32	0	99.25	0.11	939	1.924
M	0.76	1.27	3.16	94.56	0.25	790	1.606
Position: 50
Aln	A	G	C	U	gap	Seq	Con
T	88.52	1.23	0.33	8.82	1.1	6339	1.336
3	88.98	0.58	0.32	9.97	0.15	5356	1.432
B	87.5	0.71	0.26	11.36	0.17	4215	1.383
A	79.7	0	1.49	18.81	0	202	1.196
C	91.19	2.52	0	6.29	0	159	1.494
E	97.66	0.11	0.32	1.81	0.11	939	1.812
M	84.03	5.16	0.48	1.8	8.52	833	0.954
Position: 51
Aln	A	G	C	U	gap	Seq	Con
T	87.14	0.05	0.08	0.14	12.6	6486	1.172
3	99.65	0.06	0.09	0.15	0.06	5415	1.959
B	99.6	0.05	0.12	0.19	0.05	4271	1.955
A	100	0	0	0	0	202	2
C	100	0	0	0	0	160	2
E	99.79	0.11	0	0	0.11	942	1.974
M	10.43	0	0	0.11	89.46	920	-0.284
Position: 52
Aln	A	G	C	U	gap	Seq	Con
T	2.59	19.49	61.73	16.05	0.14	6379	0.534
3	2.98	22.79	59.13	15.05	0.06	5437	0.496
B	3.77	3.26	73.91	19.02	0.05	4296	0.877
A	0	98.01	1.99	0	0	201	1.859
C	0	0	97.5	2.5	0	160	1.831
E	0	95.96	3.83	0.11	0.11	940	1.739
M	0.38	0.51	71.68	26.8	0.63	791	1.019
Position: 53
Aln	A	G	C	U	gap	Seq	Con
T	77.98	3.6	18.11	0.14	0.16	6354	1.07
3	74.45	4.1	21.26	0.11	0.07	5409	0.999
B	94.37	5.21	0.23	0.12	0.07	4263	1.658
A	0.99	0	99.01	0	0	202	1.92
C	100	0	0	0	0	161	2
E	0.21	0	99.58	0.11	0.11	944	1.952
M	97.98	0.88	0.13	0.38	0.63	793	1.81
Position: 54
Aln	A	G	C	U	gap	Seq	Con
T	0.16	0	99.16	0.56	0.12	6417	1.917
3	0.13	0	99.45	0.38	0.04	5473	1.944
B	0.16	0	99.38	0.44	0.02	4325	1.938
A	0	0	100	0	0	202	2
C	0	0	100	0	0	161	2
E	0	0	99.68	0.21	0.11	946	1.964
M	0.38	0	96.72	2.27	0.63	792	1.74
Position: 55
Aln	A	G	C	U	gap	Seq	Con
T	99.5	0.09	0.08	0.16	0.17	6421	1.942
3	99.62	0.09	0.07	0.16	0.05	5475	1.955
B	99.63	0.07	0.09	0.16	0.05	4315	1.957
A	100	0	0	0	0	202	2
C	100	0	0	0	0	161	2
E	99.48	0.21	0	0.21	0.1	958	1.943
M	98.74	0.13	0.13	0.13	0.88	794	1.868
Position: 56
Aln	A	G	C	U	gap	Seq	Con
T	0.03	0.08	0.09	99.67	0.12	6454	1.96
3	0.04	0.09	0.04	99.8	0.04	5508	1.975
B	0	0.09	0.05	99.84	0.02	4348	1.98
A	0	0	0	100	0	202	2
C	0	0	0	100	0	161	2
E	0.21	0.1	0	99.58	0.1	958	1.953
M	0	0	0.5	98.87	0.63	794	1.887
Position: 57
Aln	A	G	C	U	gap	Seq	Con
T	0.34	99.1	0.26	0.15	0.15	6522	1.905
3	0.22	99.24	0.31	0.18	0.05	5545	1.921
B	0.27	99.09	0.39	0.21	0.05	4384	1.908
A	0	100	0	0	0	202	2
C	0.62	99.38	0	0	0	161	1.946
E	0	99.79	0	0.1	0.1	959	1.974
M	1.21	98.06	0	0	0.73	825	1.829
Position: 58
Aln	A	G	C	U	gap	Seq	Con
T	0.15	0.75	98.61	0.34	0.15	6554	1.868
3	0.07	0.81	98.94	0.11	0.07	5574	1.902
B	0.07	0.09	99.68	0.09	0.07	4411	1.961
A	0	19.7	79.8	0.49	0	203	1.241
C	0	0	100	0	0	161	2
E	0.1	0.1	99.58	0.1	0.1	960	1.951
M	0.72	0.48	96.14	2.05	0.6	828	1.685
Position: 59
Aln	A	G	C	U	gap	Seq	Con
T	95.45	2.62	0.09	1.55	0.29	6523	1.665
3	96.34	2.6	0.07	0.9	0.09	5542	1.732
B	99.57	0.11	0.09	0.14	0.09	4379	1.949
A	10.84	67.98	0	21.18	0	203	0.8
C	97.53	0.62	0	1.85	0	162	1.813
E	99.69	0.1	0	0.1	0.1	960	1.962
M	89.25	3.14	0.24	5.8	1.57	828	1.312
Position: 60
Aln	A	G	C	U	gap	Seq	Con
T	87.56	0.14	0.18	11.97	0.15	6575	1.419
3	85.67	0.13	0.2	13.98	0.04	5595	1.377
B	98.62	0.09	0.05	1.22	0.02	4431	1.885
A	100	0	0	0	0	203	2
C	100	0	0	0	0	162	2
E	22.89	0.31	0.94	75.75	0.1	961	1.108
M	97.34	0.24	0.12	1.45	0.85	827	1.766
Position: 61
Aln	A	G	C	U	gap	Seq	Con
T	2.16	97.32	0.2	0.09	0.23	6579	1.791
3	0.39	99.2	0.2	0.07	0.14	5597	1.916
B	0.43	99.16	0.23	0.02	0.16	4431	1.914
A	0	100	0	0	0	203	2
C	2.47	97.53	0	0	0	162	1.833
E	0.31	99.17	0.1	0.31	0.1	963	1.914
M	14.84	83.96	0.24	0.24	0.72	829	1.272
Position: 62
Aln	A	G	C	U	gap	Seq	Con
T	0.62	0.23	2.79	95.4	0.97	6627	1.642
3	0.02	0.11	0.98	98.84	0.05	5611	1.898
B	0	0.09	0.41	99.46	0.05	4443	1.945
A	0	0	0	100	0	203	2
C	0	0	0	100	0	162	2
E	0.1	0.21	3.83	95.75	0.1	965	1.719
M	4.63	1.04	15.06	71.15	8.11	863	0.509
Position: 63
Aln	A	G	C	U	gap	Seq	Con
T	0.45	3.74	80.91	1.79	13.12	6709	0.79
3	0.37	4.45	92.79	1.44	0.94	5616	1.499
B	0.34	0.23	98.47	0.92	0.05	4437	1.862
A	0	0.99	82.27	16.75	0	203	1.271
C	0	0	86.42	13.58	0	162	1.427
E	0.61	24.39	69.16	0.61	5.23	976	0.718
M	0.96	0.11	8.19	1.81	88.94	940	-0.404
Position: 64
Aln	A	G	C	U	gap	Seq	Con
T	2.79	69.51	1.01	13.31	13.37	6707	0.381
3	3.01	79.03	1.19	15.7	1.07	5613	0.993
B	2.28	96.96	0.27	0.32	0.18	4437	1.763
A	22.77	62.38	0.5	14.36	0	202	0.649
C	1.84	96.93	0	1.23	0	163	1.772
E	2.26	0.82	5.54	86.04	5.34	974	1.069
M	1.6	7.23	0.11	1.06	90	940	-0.386
Position: 65
Aln	A	G	C	U	gap	Seq	Con
T	76.46	2.62	3.47	3.9	13.56	6690	0.554
3	88.87	2.31	4.09	3.63	1.11	5596	1.267
B	93.49	2.53	1.31	2.13	0.54	4422	1.523
A	35.96	0.49	18.23	31.53	13.79	203	-0.211
C	44.17	27.61	1.84	25.15	1.23	163	0.257
E	78.89	1.65	13.8	4.63	1.03	971	0.944
M	7.45	0.11	0	1.81	90.64	940	-0.336
Position: 66
Aln	A	G	C	U	gap	Seq	Con
T	55.19	30.83	0.28	1.18	12.51	6704	0.278
3	61.5	36.83	0.27	1.21	0.2	5610	0.916
B	54.41	44.81	0.11	0.52	0.16	4437	0.935
A	61.5	32	0.5	4.5	1.5	200	0.682
C	100	0	0	0	0	163	2
E	93.83	1.44	0.92	3.7	0.1	973	1.575
M	9.26	0.11	0.43	1.17	89.04	940	-0.367
Position: 67
Aln	A	G	C	U	gap	Seq	Con
T	0.92	16.69	68.28	1.67	12.44	6747	0.409
3	0.96	19.85	77.45	1.57	0.18	5653	1.073
B	0.2	3.84	95.42	0.34	0.2	4476	1.687
A	11.82	11.33	51.72	25.12	0	203	0.287
C	0.61	0	96.93	2.45	0	163	1.78
E	2.16	95.17	0.21	2.36	0.1	974	1.655
M	0.74	0.43	7.55	2.13	89.15	940	-0.417
Position: 68
Aln	A	G	C	U	gap	Seq	Con
T	0.88	71.64	0.53	14.17	12.77	6732	0.521
3	0.9	81.34	0.64	16.76	0.35	5637	1.182
B	0.22	98.61	0.4	0.4	0.36	4461	1.86
A	6	91.5	0	1	1.5	200	1.452
C	0.61	96.95	0	2.44	0	164	1.781
E	2.97	0.31	1.84	94.77	0.1	976	1.632
M	0.74	8.4	0	0.53	90.32	940	-0.332
Position: 69
Aln	A	G	C	U	gap	Seq	Con
T	15.85	39.74	7.07	1.27	36.07	6789	-0.552
3	16.88	46.03	8.2	0.6	28.29	5694	-0.37
B	21.47	58.62	10.45	0.74	8.72	4471	0.198
A	0	0	0	0	100	203	--
C	46.34	46.34	3.66	3.05	0.61	164	0.586
E	0.1	0	0	0.1	99.8	1020	-0.019
M	4.15	0.11	0.74	5	90	940	-0.407
Position: 70
Aln	A	G	C	U	gap	Seq	Con
T	21.96	12.17	11.33	17.38	37.16	6785	-0.919
3	24.96	12.95	13.01	19.67	29.42	5690	-0.834
B	31.79	16.5	16.54	25.05	10.12	4467	-0.421
A	0	0	0	0	100	203	--
C	37.8	52.44	0.61	7.32	1.83	164	0.518
E	0	0	0.1	0	99.9	1020	-0.009
M	0.85	0.32	2.98	5.11	90.74	940	-0.397
Position: 71
Aln	A	G	C	U	gap	Seq	Con
T	23.87	5.09	0.26	1.16	69.61	6795	-0.565
3	28.28	5.65	0.28	0.33	65.46	5700	-0.51
B	36.01	7.19	0.36	0.4	56.04	4477	-0.454
A	0	0	0	0	100	203	--
C	1.83	1.22	0.61	4.27	92.07	164	-0.373
E	0	0	0	0.1	99.9	1020	-0.009
M	0.74	2.34	0.11	5.64	91.17	940	-0.369
Position: 72
Aln	A	G	C	U	gap	Seq	Con
T	15.34	8.76	0.37	0.74	74.8	6773	-0.614
3	17.32	10.29	0.33	0.3	71.75	5703	-0.607
B	22.03	13.1	0.42	0.38	64.06	4480	-0.622
A	0	0	0	0	100	203	--
C	3.66	3.66	0	1.83	90.85	164	-0.398
E	0.1	0	0	0	99.9	1020	-0.009
M	4.92	0	0.66	3.28	91.15	915	-0.368
Position: 73
Aln	A	G	C	U	gap	Seq	Con
T	1.71	8.56	19.5	2.36	67.87	6776	-0.728
3	1.26	10.11	23.1	1.86	63.67	5706	-0.697
B	1.61	12.85	29.4	2.36	53.78	4483	-0.68
A	0	0	0	0	100	203	--
C	3.05	1.83	0.61	7.93	86.59	164	-0.506
E	0	0.1	0	0	99.9	1020	-0.009
M	4.26	0	0.22	4.48	91.04	915	-0.358
Position: 74
Aln	A	G	C	U	gap	Seq	Con
T	11.1	6.05	1.58	3.54	77.73	6759	-0.699
3	13.01	7.03	1.78	2.81	75.37	5689	-0.715
B	16.57	8.96	2.24	3.58	68.65	4466	-0.782
A	0	0	0	0	100	203	--
C	3.05	5.49	0	6.1	85.37	164	-0.532
E	0	0	0.1	0	99.9	1020	-0.009
M	0.55	0	0.66	7.54	91.26	915	-0.315
Position: 75
Aln	A	G	C	U	gap	Seq	Con
T	2.83	13.73	5.4	4.48	73.57	6760	-0.764
3	2.88	16.27	6.29	4.11	70.44	5690	-0.779
B	3.67	20.73	7.99	5.24	62.37	4467	-0.832
A	0	0	0	0	100	203	--
C	6.71	0.61	3.66	8.54	80.49	164	-0.646
E	0	0	0.1	0	99.9	1020	-0.009
M	1.75	0.11	0.11	6.01	92.02	915	-0.318
Position: 76
Aln	A	G	C	U	gap	Seq	Con
T	9.96	7.69	3.46	5.11	73.78	6788	-0.803
3	10.74	9.06	3.62	5.49	71.09	5718	-0.835
B	13.64	11.32	4.61	6.99	63.45	4495	-0.906
A	0	4.43	0	0	95.57	203	-0.173
C	18.29	1.83	4.27	10.98	64.63	164	-0.798
E	0.1	0	0	0	99.9	1020	-0.009
M	3.5	0.11	2.3	1.64	92.46	915	-0.356
Position: 77
Aln	A	G	C	U	gap	Seq	Con
T	11.15	10.77	3.79	8.57	65.71	6778	-0.894
3	12.54	11.81	4.45	9.65	61.55	5708	-0.927
B	15.88	14.85	5.15	12.13	52	4485	-0.95
A	1.48	3.94	11.33	3.45	79.8	203	-0.653
C	18.9	4.27	1.83	12.8	62.2	164	-0.804
E	0.1	0	0	0	99.9	1020	-0.009
M	0.98	5.36	0	0.98	92.68	915	-0.313
Position: 78
Aln	A	G	C	U	gap	Seq	Con
T	13.06	12.78	6.7	9.44	58.02	6792	-0.962
3	15.1	14.54	7.87	10.14	52.35	5721	-0.976
B	19.1	18.19	8.92	12.76	41.04	4498	-0.941
A	2.46	6.9	24.14	2.46	64.04	203	-0.717
C	6.67	12.12	2.42	19.39	59.39	165	-0.853
E	0	0	0	0.1	99.9	1020	-0.009
M	1.31	1.75	0.11	3.17	93.66	915	-0.314
Position: 79
Aln	A	G	C	U	gap	Seq	Con
T	10.53	21.91	12.46	9.25	45.85	6781	-0.947
3	11.49	25.48	14.47	10.18	38.39	5710	-0.898
B	14.53	32.12	17.68	12.19	23.47	4486	-0.703
A	1.47	6.86	16.18	16.67	58.82	204	-0.838
C	31.52	7.27	10.91	10.91	39.39	165	-0.815
E	0.1	0	0	0	99.9	1020	-0.009
M	0.66	2.08	0.11	3.06	94.1	915	-0.293
Position: 80
Aln	A	G	C	U	gap	Seq	Con
T	11.13	26.33	14.38	13.98	34.18	6782	-0.872
3	11.64	30.41	16.76	15.92	25.27	5711	-0.744
B	14.05	37.93	19.75	19.75	8.53	4492	-0.326
A	16.58	16.58	35.18	11.06	20.6	199	-0.623
C	52.12	18.79	8.48	15.15	5.45	165	0.004
E	0.1	0	0	0	99.9	1020	-0.009
M	0.44	1.97	0.44	1.53	95.63	915	-0.247
Position: 81
Aln	A	G	C	U	gap	Seq	Con
T	24.71	9.71	18.12	18.11	29.36	6788	-0.824
3	28.23	10.76	21.2	20.24	19.57	5717	-0.654
B	35.53	11.65	25.97	24.68	2.18	4498	-0.059
A	8.04	45.73	22.11	23.12	1.01	199	0.135
C	23.64	24.85	9.09	40.61	1.82	165	0.025
E	0	0	0	0.1	99.9	1020	-0.009
M	2.62	0.33	0.33	0.55	96.17	915	-0.211
Position: 82
Aln	A	G	C	U	gap	Seq	Con
T	9.03	29.4	26.52	6.31	28.74	6799	-0.684
3	10.18	34.1	30.83	6.02	18.87	5728	-0.464
B	12.48	42.82	37.07	6.26	1.38	4505	0.208
A	10.34	11.82	47.29	30.54	0	203	0.264
C	14.55	18.18	21.21	44.85	1.21	165	0.053
E	0	0	0	0.1	99.9	1020	-0.009
M	0.77	1.75	0.22	1.09	96.17	915	-0.224
Position: 83
Aln	A	G	C	U	gap	Seq	Con
T	7.91	14.21	29.66	30.96	17.26	6722	-0.516
3	0.87	15.67	31.88	33.13	18.46	5738	-0.351
B	1.06	18.25	40.01	39.81	0.86	4514	0.348
A	0.99	36.95	11.33	50.74	0	203	0.551
C	2.42	26.06	16.97	52.73	1.82	165	0.302
E	0	0	0	0.1	99.9	1021	-0.009
M	57.73	1.57	16.55	11.23	12.92	828	0.025
Position: 84
Aln	A	G	C	U	gap	Seq	Con
T	1.19	1.77	13.41	66.75	16.89	6727	0.272
3	0.71	1.31	15.18	64.7	18.1	5739	0.24
B	0.78	0.62	18.34	79.88	0.38	4514	1.155
A	2.94	23.04	21.08	51.96	0.98	204	0.313
C	10.71	23.81	13.1	52.38	0	168	0.289
E	0	0	0	0.1	99.9	1021	-0.009
M	2.53	0.48	1.09	83.11	12.79	829	0.901
Position: 85
Aln	A	G	C	U	gap	Seq	Con
T	14.99	1.64	35.09	31.21	17.07	6697	-0.339
3	16.61	1.66	28.8	34.65	18.29	5709	-0.389
B	18.82	1.29	35.5	43.86	0.54	4485	0.362
A	51.23	18.23	25.62	4.93	0	203	0.341
C	23.21	6.55	16.07	52.98	1.19	168	0.244
E	0	0	0	0.1	99.9	1021	-0.009
M	2.05	0.48	81.91	2.77	12.79	829	0.833
Position: 86
Aln	A	G	C	U	gap	Seq	Con
T	15.39	52.29	9.46	3.6	19.26	6713	-0.242
3	16.45	60.35	0.65	2.74	19.81	5725	0.084
B	19.89	74.64	0.6	2.49	2.38	4500	0.869
A	23.04	47.06	4.9	21.57	3.43	204	0.074
C	19.05	30.95	2.38	17.26	30.36	168	-0.674
E	0	0	0	0.1	99.9	1021	-0.009
M	7.12	0.36	71.65	6.76	14.11	829	0.411
Position: 87
Aln	A	G	C	U	gap	Seq	Con
T	3.37	30.4	29.08	9.62	27.54	6744	-0.593
3	2.76	34.47	33.87	10.39	18.51	5755	-0.362
B	2.21	41.61	42.49	12.74	0.95	4530	0.366
A	29.06	48.77	11.82	10.34	0	203	0.274
C	29.17	36.9	7.14	25	1.79	168	0.039
E	0	0	0	0	100	1022	--
M	2.29	0.48	0	1.08	96.14	830	-0.21
Position: 88
Aln	A	G	C	U	gap	Seq	Con
T	17.4	20.07	7.44	27.1	27.99	6720	-0.767
3	19.26	22.95	8.34	30.47	18.98	5731	-0.601
B	23.5	28.21	8.52	38.35	1.42	4506	0.045
A	22.17	21.67	46.31	8.87	0.99	203	0.13
C	34.52	17.86	8.93	36.9	1.79	168	0.045
E	0	0	0	0	100	1022	--
M	0.84	0.48	0.84	1.57	96.27	830	-0.225
Position: 89
Aln	A	G	C	U	gap	Seq	Con
T	13.42	16.25	23.03	13.72	33.58	6700	-0.896
3	14.97	18.79	26.37	14.46	25.41	5711	-0.784
B	18.61	22.3	32.89	17.69	8.51	4488	-0.377
A	9.95	35.82	14.93	15.92	23.38	201	-0.651
C	12.5	9.52	20.24	50.6	7.14	168	-0.077
E	0	0	0	0	100	1022	--
M	2.77	0	0.36	0.96	95.9	830	-0.213
Position: 90
Aln	A	G	C	U	gap	Seq	Con
T	7.69	15.74	14.5	16.74	45.33	6739	-0.964
3	8.26	17.7	16.89	18.43	38.71	5750	-0.927
B	9.97	21.55	21.26	23.36	23.87	4525	-0.744
A	11.82	21.18	4.43	1.48	61.08	203	-0.784
C	9.52	13.69	3.57	36.31	36.9	168	-0.687
E	0	0	0	0	100	1022	--
M	3.25	2.41	0	0.84	93.49	830	-0.309
Position: 91
Aln	A	G	C	U	gap	Seq	Con
T	8.58	10.87	7.74	15.08	57.72	6722	-0.961
3	9.02	12.47	8.97	16.83	52.71	5733	-0.973
B	11.4	14.69	11.18	21.3	41.42	4507	-0.948
A	1.48	26.11	4.93	2.46	65.02	203	-0.646
C	17.86	3.57	3.57	14.88	60.12	168	-0.84
E	0	0	0	0	100	1022	--
M	3.61	1.2	0	2.89	92.29	830	-0.35
Position: 92
Aln	A	G	C	U	gap	Seq	Con
T	6.3	8.37	5.68	13.97	65.68	6728	-0.894
3	6.8	9.69	6.24	15.32	61.96	5739	-0.921
B	8.64	11.74	7.75	19.41	52.46	4514	-0.951
A	0	12.87	3.96	1.49	81.68	202	-0.527
C	12.5	3.57	0.6	19.64	63.69	168	-0.74
E	0	0	0	0	100	1022	--
M	1.57	0.12	2.77	3.37	92.17	830	-0.366
Position: 93
Aln	A	G	C	U	gap	Seq	Con
T	4.63	8.05	2.9	11.13	73.28	6756	-0.793
3	5.08	8.84	3.28	11.95	70.85	5767	-0.825
B	6.45	11.21	3.99	15.17	63.19	4542	-0.889
A	0	0.5	3.96	0	95.54	202	-0.196
C	7.74	8.93	1.79	15.48	66.07	168	-0.834
E	0	0	0	0	100	1022	--
M	0.84	2.29	0.48	4.46	91.93	830	-0.37
Position: 94
Aln	A	G	C	U	gap	Seq	Con
T	2.83	15.93	0.15	0.87	80.22	6775	-0.501
3	2.02	18.39	0.17	0.69	78.72	5786	-0.475
B	2.57	23.33	0.22	0.88	73	4560	-0.496
A	0	0	0	0	100	203	--
C	7.14	8.33	0	5.95	78.57	168	-0.658
E	0	0	0	0	100	1022	--
M	7.59	0.12	0	1.08	91.2	830	-0.31
Position: 95
Aln	A	G	C	U	gap	Seq	Con
T	4.55	7.06	8.55	6.72	73.13	6773	-0.83
3	4.29	7.88	9.92	7.54	70.37	5784	-0.86
B	5.44	10	12.59	9.57	62.4	4558	-0.934
A	0	0	0	0	100	203	--
C	5.36	0.6	2.38	7.14	84.52	168	-0.566
E	0	0	0	0	100	1022	--
M	6.14	2.53	0.12	0.84	90.36	830	-0.391
Position: 96
Aln	A	G	C	U	gap	Seq	Con
T	8.07	2.89	5.46	12.16	71.42	6778	-0.815
3	8.79	2.78	6.39	13.7	68.34	5789	-0.841
B	11.15	3.53	8.11	17.38	59.84	4564	-0.896
A	0	0	0	0	100	203	--
C	5.36	2.38	0	6.55	85.71	168	-0.517
E	0	0	0	0	100	1022	--
M	3.49	3.73	0	2.41	90.36	830	-0.415
Position: 97
Aln	A	G	C	U	gap	Seq	Con
T	1.74	20.89	8.13	1.96	67.28	6779	-0.71
3	1.19	24.37	9.5	1.45	63.49	5790	-0.67
B	1.51	30.92	12.05	1.84	53.68	4564	-0.644
A	0	0	0	0	100	203	--
C	4.76	0.6	0.6	7.74	86.31	168	-0.492
E	0	0	0	0	100	1022	--
M	4.94	0.48	0	4.34	90.24	830	-0.386
Position: 98
Aln	A	G	C	U	gap	Seq	Con
T	17.03	11.99	7.01	27.23	36.75	6765	-0.847
3	18.92	13.92	6.82	30.19	30.15	5777	-0.761
B	24.01	17.66	8.66	38.31	11.36	4552	-0.355
A	0	0	0	0	100	203	--
C	5.99	2.99	35.93	52.69	2.4	167	0.411
E	0	0	0	0	100	1022	--
M	5.9	0.24	2.41	1.2	90.24	830	-0.407
Position: 99
Aln	A	G	C	U	gap	Seq	Con
T	1.99	8.47	30.3	23.8	35.44	6743	-0.668
3	1.32	9.19	34.27	26.56	28.66	5754	-0.526
B	1.63	11.68	43.54	33.74	9.41	4529	-0.019
A	0	0	0	0	100	203	--
C	8.33	7.74	41.67	41.67	0.6	168	0.307
E	0.2	0	0	0	99.8	1022	-0.017
M	5.3	3.49	0.12	0.84	90.24	830	-0.402
Position: 100
Aln	A	G	C	U	gap	Seq	Con
T	1.34	24.53	0.97	6.36	66.8	6808	-0.623
3	1.05	28.61	1.12	6.93	62.3	5819	-0.596
B	1.33	36.22	1.37	8.77	52.31	4594	-0.541
A	0	0.49	0	0	99.51	203	-0.035
C	0.6	0	0	0	99.4	168	-0.041
E	0	0	0.2	0	99.8	1022	-0.017
M	3.49	0.6	0.12	3.61	92.17	830	-0.35
Position: 101
Aln	A	G	C	U	gap	Seq	Con
T	83.42	1.2	3.1	1.17	11.1	6829	0.901
3	93.77	1.32	3.41	1.04	0.46	5839	1.551
B	97.32	1.14	0.84	0.19	0.5	4631	1.765
A	11.39	1.49	79.21	6.44	1.49	202	0.912
C	95.24	1.79	1.79	1.19	0	168	1.649
E	93.94	2.09	0	3.88	0.1	1006	1.605
M	7.46	0.24	1.2	2.05	89.05	831	-0.422
Position: 102
Aln	A	G	C	U	gap	Seq	Con
T	1.83	69.48	16.96	0.97	10.77	6834	0.469
3	1.8	77.23	19.76	0.98	0.24	5845	1.055
B	0.76	95.08	3.56	0.35	0.26	4634	1.651
A	25.74	50.5	11.39	11.88	0.5	202	0.228
C	1.79	95.83	1.19	1.19	0	168	1.685
E	1.78	0.59	95.84	1.68	0.1	1009	1.682
M	2.05	8.8	0.24	0.84	88.07	830	-0.425
Position: 103
Aln	A	G	C	U	gap	Seq	Con
T	0.83	0.67	32.44	55.38	10.68	6846	0.337
3	0.82	0.72	37.9	60.39	0.17	5857	0.903
B	0.41	0.13	43.32	55.95	0.19	4647	0.942
A	4.93	0	33	62.07	0	203	0.831
C	0	0	0	100	0	168	2
E	1.89	3.57	13.9	80.54	0.1	1007	1.061
M	1.08	0.48	0.12	10.36	87.95	830	-0.38
Position: 104
Aln	A	G	C	U	gap	Seq	Con
T	1.29	72.2	0.15	0.57	25.8	6896	0.504
3	1.02	80.85	0.14	0.36	17.64	5868	0.848
B	0.78	98.34	0.17	0.43	0.28	4642	1.843
A	11.82	87.68	0	0.49	0	203	1.432
C	6.55	92.86	0	0.6	0	168	1.599
E	2.98	96.43	0.3	0.2	0.1	1008	1.744
M	2.88	8.98	0.23	2.3	85.62	869	-0.509
Position: 105
Aln	A	G	C	U	gap	Seq	Con
T	1.94	95.78	1.23	0.63	0.42	6846	1.664
3	0.68	98.65	0.34	0.19	0.14	5855	1.871
B	0.22	99.07	0.37	0.19	0.15	4644	1.903
A	0	100	0	0	0	203	2
C	0	99.4	0	0	0.6	168	1.936
E	0	0.1	0	0	99.9	1023	-0.009
M	11.18	73.92	8.53	4.21	2.16	832	0.666
Position: 106
Aln	A	G	C	U	gap	Seq	Con
T	0.12	0.29	96.76	2.49	0.34	6854	1.751
3	0.07	0.29	98.6	0.87	0.17	5864	1.87
B	0.04	0.32	98.97	0.47	0.19	4653	1.896
A	0	0.49	99.51	0	0	204	1.955
C	0	0	97.62	2.38	0	168	1.838
E	0.2	0.1	96.72	2.88	0.1	1007	1.766
M	0.48	0.36	82.55	15.16	1.44	831	1.175
Position: 107
Aln	A	G	C	U	gap	Seq	Con
T	15.12	81.81	1.81	0.88	0.38	6905	1.148
3	11.46	88.17	0.15	0.05	0.17	5915	1.443
B	12.92	86.72	0.13	0.04	0.19	4699	1.402
A	23.41	76.59	0	0	0	205	1.215
C	1.19	98.81	0	0	0	168	1.907
E	2.27	97.23	0.3	0.1	0.1	1011	1.79
M	43.8	32.25	13.96	8.18	1.81	831	0.119
Position: 108
Aln	A	G	C	U	gap	Seq	Con
T	43.62	37.89	14.02	4.02	0.45	6914	0.32
3	47.35	40.99	9.66	1.87	0.14	5924	0.513
B	39.72	47.68	11.34	1.1	0.15	4708	0.517
A	17.56	47.8	8.78	25.85	0	205	0.238
C	22.62	70.24	4.17	2.98	0	168	0.815
E	88.92	8.41	1.98	0.59	0.1	1011	1.381
M	20.82	8.9	46.93	19.49	3.85	831	-0.012
Position: 109
Aln	A	G	C	U	gap	Seq	Con
T	90.63	0.75	6.21	1.94	0.46	6919	1.414
3	99.63	0.1	0.12	0.03	0.12	5928	1.955
B	99.6	0.11	0.13	0.04	0.13	4710	1.952
A	100	0	0	0	0	205	2
C	99.4	0.6	0	0	0	168	1.947
E	99.7	0.1	0.1	0	0.1	1013	1.964
M	23.8	5.41	50.84	15.87	4.09	832	0.092
Position: 110
Aln	A	G	C	U	gap	Seq	Con
T	2.47	0.07	83.33	13.63	0.5	6935	1.201
3	2.46	0.03	81.56	15.78	0.17	5944	1.186
B	1.29	0.04	96.66	1.86	0.15	4726	1.743
A	5.37	0	80.98	13.66	0	205	1.135
C	1.19	0.6	97.62	0.6	0	168	1.802
E	7.31	0	11.25	81.15	0.3	1013	1.094
M	2.76	0.24	92.19	0.72	4.09	832	1.406
Position: 111
Aln	A	G	C	U	gap	Seq	Con
T	1.79	85.32	10.05	2.28	0.56	6967	1.19
3	1.07	96.1	0.15	2.46	0.22	5976	1.706
B	0.15	97.75	0.06	1.79	0.25	4757	1.817
A	20.49	54.63	1.95	22.93	0	205	0.457
C	1.19	97.62	0	1.19	0	168	1.814
E	1.48	96.75	0.2	1.48	0.1	1014	1.744
M	7.09	4.45	83.05	1.2	4.21	832	0.954
Position: 112
Aln	A	G	C	U	gap	Seq	Con
T	5.43	90.67	0.83	2.64	0.43	6981	1.406
3	0.1	99.55	0.15	0.05	0.15	5990	1.947
B	0.13	99.56	0.1	0.04	0.17	4771	1.948
A	0	99.51	0.49	0	0	205	1.956
C	1.19	98.81	0	0	0	168	1.907
E	0	99.51	0.3	0.1	0.1	1014	1.946
M	44.59	24.28	5.89	22.84	2.4	832	0.08
Position: 113
Aln	A	G	C	U	gap	Seq	Con
T	0.07	81.51	17.95	0.13	0.34	6976	1.26
3	0.03	78.9	20.88	0.05	0.13	5986	1.234
B	0.04	98.99	0.76	0.06	0.15	4768	1.904
A	0	0	100	0	0	204	2
C	0	99.4	0.6	0	0	168	1.947
E	0	0.3	99.61	0	0.1	1014	1.958
M	1.2	95.79	0.12	1.08	1.81	831	1.641
Position: 114
Aln	A	G	C	U	gap	Seq	Con
T	0.44	0.46	0.24	98.54	0.32	6976	1.855
3	0.42	0.5	0.2	98.75	0.13	5986	1.877
B	0.5	0.61	0.23	98.51	0.15	4767	1.858
A	0	0	0	100	0	205	2
C	0.6	0	0	99.4	0	168	1.947
E	0.1	0.1	0.1	99.61	0.1	1014	1.953
M	1.44	0.24	0.6	96.15	1.56	831	1.667
Position: 115
Aln	A	G	C	U	gap	Seq	Con
T	0.1	81.64	17.11	0.81	0.35	6955	1.224
3	0.08	78.96	19.93	0.85	0.17	5965	1.181
B	0.11	98.34	0.36	1.01	0.19	4750	1.849
A	0	18.54	81.46	0	0	205	1.308
C	0	99.4	0.6	0	0	168	1.947
E	0	0.1	99.5	0.3	0.1	1010	1.946
M	1.44	96.39	0	0.6	1.56	831	1.691
Position: 116
Aln	A	G	C	U	gap	Seq	Con
T	89.42	2.75	4.92	2.56	0.36	6993	1.328
3	91.76	3.15	4.81	0.15	0.13	6007	1.489
B	93.76	0.19	5.84	0.06	0.15	4793	1.633
A	97.56	0.49	1.95	0	0	205	1.817
C	86.83	0	11.98	0.6	0.6	167	1.356
E	81.07	17.74	0.5	0.59	0.1	1009	1.218
M	71.98	0.72	4.23	20.41	2.66	828	0.754
Position: 117
Aln	A	G	C	U	gap	Seq	Con
T	5.71	82.32	0.44	11.01	0.51	7001	1.098
3	0.42	86.68	0.07	12.66	0.18	6012	1.384
B	0.04	99.62	0.06	0.1	0.17	4795	1.954
A	0	94.63	0	5.37	0	205	1.698
C	1.19	98.81	0	0	0	168	1.907
E	2.27	23.72	0.1	73.62	0.3	1012	1.018
M	45.3	46.51	3.25	2.05	2.89	830	0.488
Position: 118
Aln	A	G	C	U	gap	Seq	Con
T	7.8	2.26	0.16	89.31	0.47	7000	1.383
3	0.05	1.83	0.13	97.82	0.17	6010	1.826
B	0.02	2.19	0.15	97.45	0.19	4791	1.806
A	0	0	0	100	0	205	2
C	0.6	5.36	0	93.45	0.6	168	1.583
E	0.2	0.49	0.1	99.11	0.1	1014	1.91
M	65.22	4.69	0.72	26.84	2.53	831	0.645
Position: 119
Aln	A	G	C	U	gap	Seq	Con
T	98.36	0.39	0.13	0.39	0.73	6949	1.835
3	99.43	0.25	0.03	0.03	0.25	5958	1.936
B	99.62	0.02	0.02	0.04	0.3	4737	1.954
A	99.52	0.48	0	0	0	207	1.956
C	98.21	1.19	0	0.6	0	168	1.854
E	98.52	1.28	0.1	0	0.1	1014	1.877
M	89.66	2.04	0.84	3.25	4.21	832	1.249
Position: 120
Aln	A	G	C	U	gap	Seq	Con
T	83.46	0.47	0.99	2.13	12.95	7242	0.921
3	95.93	0.45	1.15	2.26	0.22	6025	1.687
B	99	0.27	0.12	0.37	0.23	4805	1.896
A	97.58	0.97	0	1.45	0	207	1.812
C	98.81	0.6	0.6	0	0	168	1.895
E	81.05	1.18	6.22	11.35	0.2	1013	1.051
M	9.55	0.95	0.19	1.7	87.62	1058	-0.424
Position: 121
Aln	A	G	C	U	gap	Seq	Con
T	15.73	0.8	59.27	23.52	0.67	7010	0.524
3	16.53	0.86	63.11	19.27	0.23	6020	0.61
B	0.56	1.04	74.66	23.46	0.27	4799	1.055
A	0	0	99.03	0.97	0	207	1.921
C	0.6	0	83.23	16.17	0	167	1.31
E	95.46	0.2	1.08	3.16	0.1	1014	1.678
M	12.86	0.48	26.08	55.53	5.05	832	0.287
Position: 122
Aln	A	G	C	U	gap	Seq	Con
T	44.84	45.07	0.72	8.8	0.56	6964	0.55
3	49.92	39.9	0.8	9.16	0.22	5973	0.575
B	49.84	49.65	0.19	0.06	0.25	4755	0.947
A	97.55	2.45	0	0	0	204	1.834
C	43.45	56.55	0	0	0	168	1.012
E	40.73	1.68	3.85	53.65	0.1	1014	0.699
M	8.17	79.45	0.24	7.93	4.21	832	0.854
Position: 123
Aln	A	G	C	U	gap	Seq	Con
T	0.86	0.61	92.45	5.53	0.56	7017	1.508
3	0.22	0.55	93.16	5.86	0.22	6027	1.581
B	0.1	0.33	92.07	7.26	0.23	4807	1.553
A	0	0	99.51	0.49	0	206	1.956
C	1.19	0	92.86	5.95	0	168	1.582
E	0.79	1.68	97.04	0.3	0.2	1014	1.757
M	5.42	1.2	86.16	3.01	4.21	831	1.082
Position: 124
Aln	A	G	C	U	gap	Seq	Con
T	22.99	57.74	15.16	3.56	0.56	7026	0.418
3	26.01	64.11	6.2	3.46	0.22	6035	0.643
B	12.73	75.72	7.64	3.66	0.25	4814	0.833
A	0.48	99.52	0	0	0	207	1.956
C	5.95	93.45	0	0.6	0	168	1.622
E	94.28	1.78	0.59	3.25	0.1	1014	1.6
M	4.21	3.73	83.05	4.81	4.21	832	0.921
Position: 125
Aln	A	G	C	U	gap	Seq	Con
T	0.88	14.05	10.13	74.39	0.55	7040	0.837
3	0.36	16.12	0.58	82.74	0.2	6049	1.255
B	0.19	0	0.29	99.29	0.23	4819	1.924
A	0	0	1.38	98.62	0	217	1.895
C	0	0	0	100	0	168	2
E	1.28	96.25	1.78	0.59	0.1	1013	1.707
M	4.81	1.68	81.49	7.69	4.33	832	0.882
Position: 126
Aln	A	G	C	U	gap	Seq	Con
T	22.43	48.36	9.01	19.43	0.77	7045	0.168
3	23.11	54.86	9.32	12.45	0.26	6054	0.315
B	27.82	64.7	6.72	0.46	0.31	4824	0.751
A	5.07	89.86	5.07	0	0	217	1.425
C	68.45	31.55	0	0	0	168	1.101
E	4.54	0.49	22.61	72.26	0.1	1013	0.924
M	7.93	3.97	8.53	73.92	5.65	832	0.553
Position: 127
Aln	A	G	C	U	gap	Seq	Con
T	14.12	58.32	5.06	21.68	0.82	7049	0.378
3	12.23	66.95	2.15	18.41	0.26	6058	0.645
B	13.9	79.18	1.49	5.14	0.29	4827	0.997
A	0	96.31	3.69	0	0	217	1.772
C	98.21	1.79	0	0	0	168	1.871
E	6.9	2.47	4.93	85.5	0.2	1014	1.173
M	10.7	6.25	27.28	49.64	6.13	832	0.023
Position: 128
Aln	A	G	C	U	gap	Seq	Con
T	23.81	63.47	5.54	6.24	0.94	7038	0.528
3	22.54	69.59	4.99	2.51	0.36	6048	0.765
B	7.64	86.14	4.21	1.58	0.44	4818	1.201
A	31.94	7.41	43.98	16.67	0	216	0.244
C	1.79	98.21	0	0	0	168	1.871
E	91.32	4.24	0.39	3.94	0.1	1014	1.46
M	37.3	11.19	10.59	34.54	6.38	831	-0.138
Position: 129
Aln	A	G	C	U	gap	Seq	Con
T	37.12	4.01	14.64	43.12	1.11	7036	0.26
3	31.25	3.69	16.21	48.47	0.38	6045	0.33
B	39.14	4.55	18.45	37.4	0.46	4813	0.242
A	0	0	38.71	61.29	0	217	1.037
C	96.43	1.19	0	2.38	0	168	1.745
E	0.49	0.39	0.79	98.23	0.1	1015	1.839
M	67.43	6.85	6.01	12.02	7.69	832	0.302
Position: 130
Aln	A	G	C	U	gap	Seq	Con
T	82.55	11.95	1.51	1.26	2.72	7085	1.039
3	86.8	12.74	0.13	0.12	0.21	6068	1.397
B	99.65	0.08	0	0.04	0.23	4836	1.957
A	100	0	0	0	0	217	2
C	98.81	0	0.6	0.6	0	168	1.895
E	22.76	75.76	0.79	0.49	0.2	1015	1.096
M	48.48	8.62	11.42	9.44	22.03	858	-0.412
Position: 131
Aln	A	G	C	U	gap	Seq	Con
T	6.93	2.1	41.29	48.81	0.88	7058	0.507
3	3.69	0.28	43.33	52.51	0.18	6069	0.77
B	3.8	0.19	50.8	45.01	0.21	4839	0.766
A	14.81	2.78	74.54	7.87	0	216	0.844
C	0	0.6	51.5	47.9	0	167	0.954
E	0.79	0.2	1.08	97.83	0.1	1014	1.814
M	31.89	15.64	23.83	21.42	7.22	831	-0.332
Position: 132
Aln	A	G	C	U	gap	Seq	Con
T	3.68	10.02	64.1	21.35	0.85	7044	0.53
3	3.75	11.4	65.86	18.85	0.15	6054	0.598
B	4.44	14.24	76.96	4.19	0.17	4823	0.899
A	3.7	0	93.52	2.78	0	216	1.59
C	1.19	0.6	83.93	14.29	0	168	1.267
E	0.49	0.3	7.19	91.92	0.1	1015	1.541
M	3.61	1.81	46.57	40.79	7.22	831	0.263
Position: 133
Aln	A	G	C	U	gap	Seq	Con
T	0.4	0.31	3.52	85.64	10.14	7052	1.043
3	0.23	0.12	3.86	95.63	0.17	6060	1.707
B	0.25	0.12	0.25	99.21	0.17	4830	1.915
A	0	0	0	100	0	217	2
C	2.38	0	1.79	95.83	0	168	1.709
E	0.2	0.1	21.92	77.59	0.2	1013	1.187
M	1.2	1.8	1.32	9.96	85.71	833	-0.5
Position: 134
Aln	A	G	C	U	gap	Seq	Con
T	31.45	49.67	6.88	1.3	10.7	6992	0.068
3	34.62	55.78	7.98	1.35	0.27	6002	0.597
B	30.15	67.16	1.03	1.34	0.31	4769	0.909
A	67.28	32.72	0	0	0	217	1.088
C	37.5	58.93	0.6	1.19	1.79	168	0.76
E	48.62	7.28	42.32	1.67	0.1	1016	0.583
M	6.98	3.13	0.12	0.96	88.81	831	-0.429
Position: 135
Aln	A	G	C	U	gap	Seq	Con
T	1.39	1.77	71.43	14.77	10.64	7068	0.501
3	1.22	2.04	79.35	16.98	0.41	6077	1.068
B	0.29	2.29	93.7	3.28	0.43	4845	1.558
A	9.22	0	90.32	0.46	0	217	1.515
C	4.76	0	92.86	2.38	0	168	1.563
E	3.94	1.28	8.47	85.91	0.39	1015	1.206
M	1.92	0.12	8.53	0.96	88.46	832	-0.414
Position: 136
Aln	A	G	C	U	gap	Seq	Con
T	0.24	0.28	74.65	14.3	10.53	7064	0.686
3	0.16	0.18	82.92	16.5	0.23	6073	1.291
B	0.02	0	99.03	0.76	0.19	4842	1.909
A	0	0	99.54	0	0.46	217	1.948
C	2.38	3.57	89.29	4.76	0	168	1.345
E	0.89	1.08	2.47	95.17	0.39	1014	1.63
M	0.36	0.36	10.46	0	88.82	832	-0.327
Position: 137
Aln	A	G	C	U	gap	Seq	Con
T	2.39	3.08	45.04	38.73	10.77	7021	0.107
3	2.7	3.2	50.65	43.02	0.43	6030	0.637
B	0.69	2.49	54.49	41.87	0.46	4812	0.77
A	0	0	99.53	0.47	0	213	1.957
C	0.6	0.6	58.93	39.88	0	168	0.933
E	12.94	7.26	21.89	57.51	0.4	1005	0.365
M	0.48	2.64	1.08	6.97	88.82	832	-0.442
Position: 138
Aln	A	G	C	U	gap	Seq	Con
T	13.11	20.95	12.54	42.81	10.58	7001	-0.311
3	14.49	24.36	14.33	46.64	0.18	6010	0.165
B	17.95	11.04	17.49	53.3	0.21	4790	0.257
A	0	0	0	100	0	214	2
C	2.98	0	8.33	88.69	0	168	1.397
E	1.09	92.94	2.29	3.58	0.1	1006	1.522
M	5.05	0.36	0.36	5.41	88.82	832	-0.432
Position: 139
Aln	A	G	C	U	gap	Seq	Con
T	28.84	22.43	6.89	31.27	10.58	7043	-0.346
3	32.39	25.96	7.9	33.51	0.25	6052	0.124
B	22.12	28.93	7.78	40.9	0.27	4819	0.158
A	28.11	9.22	37.33	25.35	0	217	0.136
C	3.57	1.79	3.57	91.07	0	168	1.43
E	81.99	15.45	2.17	0.2	0.2	1016	1.19
M	7.81	0.72	0.12	2.52	88.82	832	-0.413
Position: 140
Aln	A	G	C	U	gap	Seq	Con
T	19.55	14.22	14.73	40.95	10.55	7060	-0.348
3	20.83	15.36	16.58	47.03	0.21	6069	0.149
B	23.4	15.65	18.98	41.76	0.21	4837	0.087
A	25.93	47.22	10.65	16.2	0	216	0.214
C	40.48	38.69	6.55	13.1	1.19	168	0.2
E	7.48	7.19	6.4	78.64	0.3	1016	0.89
M	5.77	0.84	2.76	1.8	88.82	832	-0.471
Position: 141
Aln	A	G	C	U	gap	Seq	Con
T	49.54	27.1	6.37	6.5	10.5	7049	-0.073
3	56.39	28.66	7.35	7.43	0.18	6058	0.442
B	63.91	22.58	4.74	8.56	0.21	4827	0.568
A	10.23	89.3	0	0.47	0	215	1.482
C	3.57	94.64	0.6	1.19	0	168	1.633
E	30.41	44.69	21.26	3.54	0.1	1016	0.301
M	8.41	1.8	0.36	0.72	88.7	832	-0.413
Position: 142
Aln	A	G	C	U	gap	Seq	Con
T	4.92	59.99	22.3	2.26	10.52	7071	0.185
3	5.25	66.12	25.89	2.5	0.25	6080	0.718
B	2.37	65.06	31.7	0.68	0.19	4848	0.873
A	0.46	97.22	2.31	0	0	216	1.799
C	4.17	92.86	0.6	2.38	0	168	1.537
E	19.98	64.57	3.15	11.71	0.59	1016	0.553
M	2.64	7.93	0.24	0.48	88.7	832	-0.414
Position: 143
Aln	A	G	C	U	gap	Seq	Con
T	39.4	0.52	3.87	45.55	10.66	7063	0.175
3	43.4	0.49	4.31	51.47	0.33	6072	0.717
B	31.76	0.35	4.94	62.76	0.19	4842	0.789
A	72.69	0	1.39	25.93	0	216	1.075
C	78.57	2.38	4.76	13.69	0.6	168	0.94
E	92.7	1.28	1.97	2.96	1.08	1014	1.464
M	1.92	0.36	0.36	8.29	89.06	832	-0.396
Position: 144
Aln	A	G	C	U	gap	Seq	Con
T	8.94	31.58	30.52	18.24	10.73	7062	-0.367
3	9.49	34.44	35.25	20.46	0.36	6071	0.113
B	11.07	40.72	24.07	23.76	0.37	4840	0.096
A	5.14	40.65	46.26	7.94	0	214	0.447
C	10.12	80.36	4.17	2.98	2.38	168	0.894
E	2.85	3.24	86.14	7.37	0.39	1017	1.191
M	4.57	0.48	0.96	4.93	89.06	832	-0.449
Position: 145
Aln	A	G	C	U	gap	Seq	Con
T	7.68	36.74	18.23	26.6	10.76	7072	-0.332
3	7.65	40.54	20.74	30.67	0.41	6081	0.154
B	3.36	47.89	24.13	24.29	0.33	4849	0.302
A	6.54	55.14	29.91	8.41	0	214	0.448
C	19.05	78.57	0	0	2.38	168	1.095
E	28.29	2.46	2.65	65.72	0.88	1018	0.738
M	5.53	0.12	3.37	1.92	89.06	832	-0.447
Position: 146
Aln	A	G	C	U	gap	Seq	Con
T	3.84	70.83	4.39	10.36	10.58	7087	0.376
3	3.71	79.12	5.02	11.89	0.26	6096	0.947
B	3.02	95.46	0.45	0.82	0.25	4863	1.665
A	15.28	75.93	4.17	4.63	0	216	0.888
C	14.88	82.14	0.6	1.19	1.19	168	1.138
E	4.52	1.67	27.04	66.37	0.39	1017	0.757
M	2.52	7.09	0.48	0.84	89.06	832	-0.43
Position: 147
Aln	A	G	C	U	gap	Seq	Con
T	0.97	87.61	0.61	0.25	10.55	7080	1.148
3	0.95	98	0.66	0.16	0.23	6089	1.82
B	0.6	99.05	0.1	0.02	0.23	4853	1.905
A	5.09	82.87	10.65	1.39	0	216	1.127
C	3.57	95.24	0	0.6	0.6	168	1.661
E	1.76	96.18	1.18	0.59	0.29	1020	1.694
M	0.6	9.13	0.36	0.84	89.06	832	-0.377
Position: 148
Aln	A	G	C	U	gap	Seq	Con
T	16.77	70.7	1.07	0.68	10.78	7085	0.533
3	18.35	79.67	0.97	0.57	0.44	6094	1.139
B	22.04	76.62	0.64	0.35	0.35	4855	1.114
A	15.21	70.05	11.98	2.76	0	217	0.717
C	35.71	58.33	2.38	2.98	0.6	168	0.681
E	1.47	96.18	0.2	1.17	0.98	1022	1.679
M	1.2	6.73	1.56	0.96	89.54	832	-0.43
Position: 149
Aln	A	G	C	U	gap	Seq	Con
T	87.78	0.65	0.27	0.15	11.15	7105	1.175
3	99.17	0.25	0.28	0.1	0.21	6114	1.91
B	99.69	0.02	0	0.06	0.23	4876	1.962
A	98.16	0.46	1.38	0	0	217	1.852
C	96.43	1.79	0.6	0.6	0.6	168	1.702
E	96.87	1.27	1.37	0.29	0.2	1021	1.744
M	1.44	3.37	0.12	0.48	94.59	832	-0.269
Position: 150
Aln	A	G	C	U	gap	Seq	Con
T	0.21	0.06	11.67	76.5	11.56	7103	0.727
3	0.1	0.03	12.19	87.48	0.2	6112	1.426
B	0.06	0.04	14.85	84.82	0.23	4874	1.354
A	0	0	5.99	94.01	0	217	1.673
C	2.38	0	49.4	47.62	0.6	168	0.803
E	0.29	0	0.78	98.82	0.1	1021	1.892
M	0.6	0.24	0.12	0.84	98.2	832	-0.125
Position: 151
Aln	A	G	C	U	gap	Seq	Con
T	88.14	0.1	0.08	0.06	11.62	7100	1.222
3	99.57	0.11	0.08	0	0.23	6109	1.95
B	99.61	0.08	0.04	0	0.27	4871	1.953
A	99.54	0.46	0	0	0	217	1.958
C	97.02	0	0	1.79	1.19	168	1.754
E	99.41	0.2	0.29	0	0.1	1021	1.937
M	1.44	0	0.12	0.12	98.32	832	-0.102
Position: 152
Aln	A	G	C	U	gap	Seq	Con
T	73.26	11.81	2.69	0.65	11.59	7102	0.528
3	82.34	13.68	3.11	0.64	0.23	6111	1.15
B	81.39	16.89	1.13	0.37	0.23	4874	1.198
A	85.19	0	13.43	1.39	0	216	1.328
C	97.02	0.6	0.6	0.6	1.19	168	1.726
E	86.29	1.27	10.38	1.76	0.29	1021	1.264
M	0.96	0.24	0	0.72	98.08	832	-0.126
Position: 153
Aln	A	G	C	U	gap	Seq	Con
T	0.2	9.11	77.31	1.72	11.66	7100	0.685
3	0.13	10.57	87.26	1.87	0.16	6109	1.348
B	0.04	13.2	84.75	1.81	0.21	4873	1.281
A	1.38	0.46	89.86	8.29	0	217	1.442
C	2.38	0	94.05	2.38	1.19	168	1.56
E	0.29	0.2	98.72	0.79	0	1019	1.884
M	0.24	0.12	0	0.48	99.16	832	-0.065
Position: 154
Aln	A	G	C	U	gap	Seq	Con
T	14.7	8.07	40.17	25.37	11.7	7088	-0.326
3	14.96	9.32	46.5	29.06	0.16	6097	0.221
B	18.54	11.54	40.03	29.73	0.16	4861	0.122
A	2.31	0	89.81	7.41	0.46	216	1.412
C	76.19	2.38	5.95	14.29	1.19	168	0.829
E	0.59	0.69	68.14	30.49	0.1	1020	0.996
M	0.24	0	0.24	0.24	99.28	832	-0.059
Position: 155
Aln	A	G	C	U	gap	Seq	Con
T	14.72	24.5	30.51	18.55	11.72	7066	-0.474
3	16.26	26.96	35.44	21.12	0.21	6075	0.037
B	19.4	14.87	41.21	24.28	0.25	4836	0.083
A	0	0	62.67	37.33	0	217	1.047
C	29.17	54.76	1.19	13.69	1.19	168	0.437
E	4.9	90.01	2.35	2.74	0	1021	1.381
M	0.36	0.12	0.12	0.6	98.8	832	-0.09
Position: 156
Aln	A	G	C	U	gap	Seq	Con
T	11.58	8.56	27.29	40.56	12.01	7083	-0.311
3	13.15	9.9	30.11	46.19	0.66	6092	0.188
B	16.13	12.03	31.91	39.1	0.82	4854	0.079
A	0	0	92.17	7.83	0	217	1.604
C	7.14	1.79	58.93	31.55	0.6	168	0.594
E	1.76	1.86	8.33	88.05	0	1021	1.33
M	0.84	0	0	0.72	98.44	832	-0.1
Position: 157
Aln	A	G	C	U	gap	Seq	Con
T	8.99	42.35	7.27	29.87	11.5	7093	-0.222
3	10.23	48.9	8.37	32.32	0.18	6102	0.313
B	2.53	46.42	10.48	40.38	0.18	4866	0.462
A	0	99.54	0	0	0.46	216	1.948
C	1.19	10.71	2.98	84.52	0.6	168	1.167
E	49.12	50	0.1	0.69	0.1	1020	0.925
M	1.44	0.24	0	0.6	97.72	832	-0.14
Position: 158
Aln	A	G	C	U	gap	Seq	Con
T	7.38	66.43	13.36	1.58	11.25	7086	0.268
3	8.43	74.59	15.16	1.64	0.18	6095	0.854
B	10.46	70.23	17.74	1.34	0.23	4858	0.751
A	0	99.54	0.46	0	0	216	1.957
C	3.57	91.07	1.19	3.57	0.6	168	1.402
E	0.59	90.01	5.97	3.43	0	1021	1.41
M	0.36	0.96	2.52	0.72	95.43	832	-0.252
Position: 159
Aln	A	G	C	U	gap	Seq	Con
T	1	74.04	1.23	13.25	10.48	7093	0.598
3	0.61	83.31	1.02	14.9	0.16	6101	1.241
B	0.08	99.16	0.43	0.16	0.16	4868	1.912
A	0	100	0	0	0	212	2
C	0	96.45	0	2.96	0.59	169	1.744
E	3.23	4.31	4.02	88.25	0.2	1021	1.277
M	4.09	0.72	3	3.12	89.06	832	-0.478
Position: 160
Aln	A	G	C	U	gap	Seq	Con
T	89.25	0.14	0.08	0.11	10.41	7107	1.273
3	99.74	0.07	0.03	0.03	0.13	6115	1.967
B	99.82	0.02	0	0	0.16	4880	1.976
A	100	0	0	0	0	216	2
C	98.22	1.18	0	0	0.59	169	1.843
E	99.31	0.29	0.2	0.2	0	1019	1.93
M	9.38	0.48	0.48	0.72	88.94	832	-0.375
Position: 161
Aln	A	G	C	U	gap	Seq	Con
T	76.66	0.21	0.31	12.39	10.43	7117	0.74
3	85.04	0.21	0.29	14.27	0.18	6125	1.337
B	99.63	0.2	0.02	0	0.14	4886	1.958
A	100	0	0	0	0	217	2
C	98.82	0	0	0.59	0.59	169	1.884
E	12.14	0.29	1.67	85.6	0.29	1021	1.285
M	9.62	0.24	0.48	0.84	88.82	832	-0.369
Position: 162
Aln	A	G	C	U	gap	Seq	Con
T	75.22	0.65	0.69	12.97	10.48	7110	0.662
3	83.46	0.64	0.8	14.87	0.23	6118	1.246
B	99.22	0.14	0.39	0.04	0.2	4880	1.917
A	100	0	0	0	0	217	2
C	97.04	0.59	0	1.78	0.59	169	1.755
E	4.6	3.13	2.94	88.93	0.39	1021	1.3
M	9.38	0.72	0	1.08	88.82	832	-0.37
Position: 163
Aln	A	G	C	U	gap	Seq	Con
T	0.72	13.69	66.36	8	11.24	7116	0.293
3	0.64	15.82	74.53	8.75	0.26	6124	0.881
B	0.53	18.22	70.22	10.74	0.29	4886	0.778
A	0	0.46	99.54	0	0	217	1.958
C	3.55	1.18	90.53	4.14	0.59	169	1.377
E	1.27	7.64	89.81	1.08	0.2	1021	1.405
M	0.72	0.36	0.6	3.12	95.19	832	-0.253
Position: 164
Aln	A	G	C	U	gap	Seq	Con
T	8.11	29.17	9.6	41.55	11.57	7116	-0.255
3	9.11	31.65	11.02	47.93	0.29	6124	0.27
B	11.4	39.57	13.24	35.48	0.31	4887	0.165
A	0	0	0	100	0	217	2
C	7.1	81.07	4.73	6.51	0.59	169	0.963
E	0.1	0.39	2.75	96.47	0.29	1020	1.736
M	0.84	0.12	0	1.32	97.72	832	-0.139
Position: 165
Aln	A	G	C	U	gap	Seq	Con
T	27.47	40.58	6.74	13.51	11.7	7077	-0.289
3	31.14	45.4	7.82	15.36	0.28	6086	0.227
B	20.74	50.59	9.48	18.86	0.33	4851	0.222
A	0	100	0	0	0	216	2
C	26.19	64.29	0	8.93	0.6	168	0.717
E	87.24	9.13	1.57	1.96	0.1	1019	1.296
M	0.6	0.12	0.12	0.72	98.44	832	-0.11
Position: 166
Aln	A	G	C	U	gap	Seq	Con
T	14.06	46.9	10.39	17.04	11.61	7091	-0.277
3	16.13	54.35	10.79	18.59	0.15	6101	0.283
B	18.01	47.05	13.2	21.56	0.18	4865	0.16
A	36.57	62.5	0	0.93	0	216	0.983
C	5.39	4.79	46.71	42.51	0.6	167	0.469
E	2.84	87.45	1.57	8.14	0	1020	1.296
M	0.48	0.24	0.12	0.36	98.8	832	-0.092
Position: 167
Aln	A	G	C	U	gap	Seq	Con
T	29.42	34.46	5.57	18.82	11.72	7071	-0.332
3	33.89	39.89	6.42	19.64	0.16	6079	0.208
B	23.34	44.19	7.87	24.4	0.21	4841	0.182
A	5.53	89.86	0	4.61	0	217	1.426
C	10.65	6.51	1.78	80.47	0.59	169	0.988
E	89.91	8.91	0.88	0.29	0	1021	1.466
M	0.24	0.12	0.12	0.12	99.4	832	-0.053
Position: 168
Aln	A	G	C	U	gap	Seq	Con
T	10.94	67.54	0.28	9.41	11.83	7101	0.323
3	12.57	75.9	0.31	10.93	0.28	6109	0.918
B	15.33	70.44	0.29	13.59	0.35	4879	0.778
A	6.22	90.91	1.44	1.44	0	209	1.45
C	2.96	93.49	0.59	0	2.96	169	1.506
E	0.69	98.92	0.2	0.2	0	1021	1.9
M	0.48	0.12	0	0	99.4	832	-0.045
Position: 169
Aln	A	G	C	U	gap	Seq	Con
T	3.29	4.37	72.51	8.12	11.7	7134	0.414
3	3.71	4.95	81.73	9.33	0.28	6142	1.023
B	1.98	5.91	80.39	11.44	0.29	4905	1.006
A	47.69	0.93	47.22	4.17	0	216	0.726
C	2.37	2.37	90.53	2.96	1.78	169	1.325
E	2.74	1.18	95.49	0.29	0.29	1021	1.664
M	0.36	0.48	0	0.12	99.04	832	-0.073
Position: 170
Aln	A	G	C	U	gap	Seq	Con
T	0.25	0.04	1.04	87.03	11.64	7137	1.137
3	0.13	0.05	1.2	98.44	0.18	6145	1.863
B	0.12	0.04	0.77	98.84	0.22	4906	1.888
A	0	0.46	9.68	89.86	0	217	1.5
C	2.37	0	0	95.86	1.78	169	1.675
E	0.2	0	1.47	98.34	0	1022	1.869
M	0.72	0	0	0	99.28	832	-0.047
Position: 171
Aln	A	G	C	U	gap	Seq	Con
T	87.98	0.11	0.04	0.09	11.78	7044	1.214
3	99.59	0.12	0.05	0.08	0.17	6052	1.95
B	99.63	0.06	0.06	0.04	0.21	4817	1.954
A	98.15	1.85	0	0	0	216	1.867
C	97.63	0.59	0	0	1.78	169	1.784
E	99.71	0	0	0.29	0	1019	1.971
M	0.6	0	0	0.12	99.28	832	-0.052
Position: 172
Aln	A	G	C	U	gap	Seq	Con
T	88.16	0.17	0.03	0.1	11.54	7138	1.221
3	99.56	0.18	0.02	0.05	0.2	6146	1.948
B	99.74	0.02	0.02	0.02	0.2	4906	1.966
A	100	0	0	0	0	217	2
C	98.22	0	0	1.18	0.59	169	1.843
E	98.63	0.98	0	0.2	0.2	1023	1.876
M	0.96	0.12	0.12	0.24	98.56	832	-0.1
Position: 173
Aln	A	G	C	U	gap	Seq	Con
T	1.19	1.54	0.92	85.31	11.03	7141	1.002
3	1.09	1.68	0.99	96.08	0.16	6148	1.69
B	0.71	1.49	1	96.62	0.18	4910	1.724
A	8.29	0.46	0.46	90.78	0	217	1.504
C	7.65	2.35	1.18	88.24	0.59	170	1.299
E	1.37	2.84	1.08	94.61	0.1	1021	1.611
M	0.6	0.36	0.36	4.21	94.47	832	-0.262
Position: 174
Aln	A	G	C	U	gap	Seq	Con
T	81.9	2.87	3.58	1.1	10.56	7115	0.82
3	92.57	3.06	3.2	0.98	0.2	6121	1.497
B	94.03	3.27	1.84	0.65	0.2	4888	1.579
A	34.11	6.07	49.07	10.75	0	214	0.375
C	84.71	8.24	1.76	4.71	0.59	170	1.135
E	97.75	1.37	0.1	0.49	0.29	1020	1.805
M	2.04	0.36	6.73	1.2	89.66	832	-0.417
Position: 175
Aln	A	G	C	U	gap	Seq	Con
T	0.28	0.62	87.4	1.12	10.58	7143	1.134
3	0.13	0.68	97.82	1.04	0.33	6149	1.805
B	0.06	0.08	98.88	0.73	0.24	4911	1.891
A	1.39	10.65	82.41	5.56	0	216	1.109
C	2.35	0	94.12	2.94	0.59	170	1.585
E	0.2	1.47	95.89	1.56	0.88	1023	1.664
M	0.96	0.24	8.17	1.32	89.3	832	-0.395
Position: 176
Aln	A	G	C	U	gap	Seq	Con
T	10.01	4.9	67.71	6.61	10.77	7122	0.253
3	11.44	5.58	75.85	6.59	0.54	6128	0.797
B	0.55	0.94	91.74	6.52	0.25	4889	1.498
A	2.79	6.05	71.63	19.53	0	215	0.806
C	1.76	0	82.35	15.29	0.59	170	1.197
E	65.17	27.61	0.88	4.2	2.15	1025	0.671
M	1.08	0.84	4.09	4.93	89.06	832	-0.461
Position: 177
Aln	A	G	C	U	gap	Seq	Con
T	2.31	61.24	8.48	16.96	11.01	7110	0.134
3	2.5	70.55	7.78	18.36	0.8	6116	0.704
B	2.67	86.87	7.08	3.14	0.25	4874	1.231
A	3.7	35.19	54.63	6.48	0	216	0.561
C	1.18	4.12	74.71	19.41	0.59	170	0.906
E	1.46	0.49	1.27	93.09	3.7	1027	1.448
M	1.08	3.85	0	6.01	89.06	832	-0.425
Position: 178
Aln	A	G	C	U	gap	Seq	Con
T	7.38	41.39	31.07	8.8	11.36	7059	-0.22
3	7.77	47.95	33.9	9.3	1.09	6065	0.265
B	9.19	38.3	40.83	11.32	0.37	4823	0.232
A	6.48	47.69	39.35	5.56	0.93	216	0.392
C	4.71	5.29	78.24	11.18	0.59	170	0.882
E	1.36	93.28	0.19	0.58	4.58	1027	1.466
M	5.05	0.6	0.48	4.57	89.3	832	-0.434
Position: 179
Aln	A	G	C	U	gap	Seq	Con
T	71.97	2.83	0.11	0.21	24.87	7136	0.486
3	80.38	2.57	0.1	0.13	16.82	6142	0.82
B	96.53	3.04	0.12	0.16	0.14	4898	1.754
A	96.31	3.69	0	0	0	217	1.772
C	70.59	25.88	1.18	1.76	0.59	170	0.907
E	0	0.1	0	0	99.9	1028	-0.009
M	9.5	0	0	0.48	90.02	832	-0.297
Position: 180
Aln	A	G	C	U	gap	Seq	Con
T	0.35	0.38	0.34	73.98	24.95	7141	0.593
3	0.21	0.15	0.37	82.38	16.89	6147	0.936
B	0.27	0.18	0.31	99.02	0.22	4903	1.897
A	0	0	3.69	96.31	0	217	1.772
C	1.76	0.59	0	95.88	1.76	170	1.657
E	0	0	0	0	100	1028	--
M	1.08	2.04	0.12	6.73	90.02	832	-0.396
Position: 181
Aln	A	G	C	U	gap	Seq	Con
T	62.17	12.41	0.08	0.14	25.19	7101	0.173
3	68.43	14.3	0.08	0.11	17.08	6107	0.428
B	81.64	17.83	0.06	0.14	0.33	4863	1.264
A	96.31	2.76	0.92	0	0	217	1.742
C	93.53	3.53	0	1.18	1.76	170	1.526
E	0	0	0	0	100	1028	--
M	9.25	0.24	0.12	0.12	90.26	832	-0.301
Position: 182
Aln	A	G	C	U	gap	Seq	Con
T	27.44	9.47	19.46	15.54	28.1	7129	-0.787
3	30.25	10.19	22.49	16.53	20.54	6135	-0.651
B	37.95	12.78	28.22	20.73	0.33	4891	0.071
A	0	0	0	0	100	217	--
C	16.47	29.41	2.35	49.41	2.35	170	0.248
E	0	0	0	0	100	1028	--
M	8.65	0	0.36	2.04	88.94	832	-0.379
Position: 183
Aln	A	G	C	U	gap	Seq	Con
T	5.52	34.95	7.77	20.3	31.46	7102	-0.668
3	5.11	40.56	8.95	23.13	22.26	6110	-0.475
B	6.41	50.94	11.24	29.04	2.36	4865	0.203
A	0	0	0	0	100	217	--
C	5.92	1.78	1.78	7.1	83.43	169	-0.605
E	0	0	0	0	100	1028	--
M	9.25	0.12	0.24	2.04	88.34	832	-0.39
Position: 184
Aln	A	G	C	U	gap	Seq	Con
T	21.92	18.39	20.62	13.3	25.77	7100	-0.806
3	24.64	18.18	23.91	15.29	17.98	6107	-0.658
B	30.49	21.36	29.69	17	1.46	4864	-0.071
A	10.19	32.87	7.41	49.54	0	216	0.357
C	7.1	86.39	1.78	3.55	1.18	169	1.173
E	0	0	0	0	100	1028	--
M	5.53	6.01	0.12	0.48	87.86	832	-0.445
Position: 185
Aln	A	G	C	U	gap	Seq	Con
T	8.82	5.48	33.59	25.97	26.15	7140	-0.601
3	9.77	5.92	36.41	30.08	17.82	6111	-0.421
B	11.54	6.24	43.78	37.16	1.27	4868	0.232
A	16.2	26.85	43.52	13.43	0	216	0.154
C	3.55	0	90.53	4.73	1.18	169	1.391
E	0	0	0	0	100	1028	--
M	3.11	3.34	2.3	0.92	90.32	868	-0.446
Position: 186
Aln	A	G	C	U	gap	Seq	Con
T	2.5	8.05	54.21	9.48	25.76	7120	-0.246
3	1.94	9.24	62.5	8.36	17.97	6128	0.045
B	2.44	11.59	74.16	10.3	1.52	4884	0.73
A	0	0	95.85	4.15	0	217	1.751
C	1.79	0.6	15.48	80.95	1.19	168	1.089
E	0	0	0	0	100	1028	--
M	6.73	0.72	0.48	3.25	88.82	832	-0.439
Position: 187
Aln	A	G	C	U	gap	Seq	Con
T	5.94	38.42	1.68	28.63	25.33	7139	-0.396
3	5.63	42.35	1.77	32.79	17.46	6146	-0.178
B	7.06	48.71	2.22	41.06	0.94	4902	0.493
A	0	99.08	0	0.92	0	217	1.924
C	2.96	81.66	0.59	13.61	1.18	169	1.076
E	0	0	0	0	100	1028	--
M	8.89	0.48	1.2	1.2	88.22	832	-0.425
Position: 188
Aln	A	G	C	U	gap	Seq	Con
T	17.38	9.51	33.74	14.49	24.87	7128	-0.691
3	17.18	10.9	39.07	15.89	16.95	6135	-0.51
B	21.51	9.3	49.01	19.91	0.27	4891	0.208
A	0.92	98.62	0	0.46	0	217	1.882
C	69.82	2.96	4.73	21.3	1.18	169	0.705
E	0	0	0	0	100	1028	--
M	8.05	0.48	0	3.49	87.98	832	-0.421
Position: 189
Aln	A	G	C	U	gap	Seq	Con
T	47.63	5.31	16.5	5.64	24.92	7123	-0.395
3	54.23	4.24	18.91	5.64	16.98	6130	-0.135
B	63.59	5.32	23.72	7.08	0.29	4886	0.567
A	100	0	0	0	0	217	2
C	16.57	68.05	8.88	4.73	1.78	169	0.535
E	0	0	0	0	100	1028	--
M	5.77	0.36	0.12	5.77	87.98	832	-0.438
Position: 190
Aln	A	G	C	U	gap	Seq	Con
T	13.37	26.67	1.97	32.63	25.36	7144	-0.545
3	13.61	29.17	2.28	37.57	17.38	6151	-0.351
B	12.92	36.3	2.83	47.1	0.86	4907	0.355
A	93.55	5.99	0.46	0	0	217	1.631
C	30.18	62.72	0.59	3.55	2.96	169	0.632
E	0	0	0	0	100	1028	--
M	8.05	0.6	0	2.52	88.82	832	-0.399
Position: 191
Aln	A	G	C	U	gap	Seq	Con
T	3.89	60.23	7.71	2.81	25.36	7093	-0.062
3	1.9	69.34	8.92	2.52	17.31	6100	0.296
B	2.2	82.87	11.2	3.13	0.6	4858	1.088
A	4.19	94.88	0	0.93	0	215	1.674
C	76.33	19.53	0	2.96	1.18	169	0.993
E	0	0	0	0	100	1028	--
M	3.73	1.92	0.36	4.81	89.18	832	-0.457
Position: 192
Aln	A	G	C	U	gap	Seq	Con
T	20.67	38.87	4.27	11.04	25.15	7137	-0.549
3	23.7	42.27	4.52	12.39	17.12	6144	-0.371
B	29	51.1	4.55	14.83	0.51	4896	0.327
A	16.29	42.99	24.89	15.84	0	221	0.13
C	4.73	90.53	0	3.55	1.18	169	1.391
E	0	0	0	0	100	1028	--
M	1.32	2.88	4.09	2.52	89.18	832	-0.484
Position: 193
Aln	A	G	C	U	gap	Seq	Con
T	9.98	24.17	12.6	27.72	25.53	7113	-0.73
3	11.32	27.97	12.92	30.25	17.53	6120	-0.564
B	14.03	34.69	15.1	35.25	0.92	4874	0.05
A	4.11	9.59	25.11	60.73	0.46	219	0.504
C	3.55	1.18	33.73	60.36	1.18	169	0.685
E	0	0	0	0	100	1028	--
M	1.32	0.6	5.77	2.28	90.02	832	-0.426
Position: 194
Aln	A	G	C	U	gap	Seq	Con
T	6.58	48.27	10.11	9.13	25.92	7123	-0.438
3	6.39	54.61	11.68	10.15	17.18	6131	-0.207
B	7.69	65.76	13.93	12.09	0.53	4889	0.502
A	7.44	61.86	16.28	14.42	0	215	0.463
C	34.52	52.38	0.6	11.31	1.19	168	0.482
E	0	0	0	0	100	1028	--
M	2.28	0.24	0.36	1.08	96.03	832	-0.222
Position: 195
Aln	A	G	C	U	gap	Seq	Con
T	73.76	0.31	0.07	0.35	25.52	7160	0.601
3	82.77	0.34	0.03	0.11	16.75	6168	0.965
B	99.31	0.39	0.04	0.14	0.12	4920	1.927
A	99.1	0.9	0	0	0	221	1.926
C	95.24	0.6	0.6	2.38	1.19	168	1.617
E	0	0	0	0	100	1028	--
M	1.92	0	0.24	1.68	96.15	832	-0.207
Position: 196
Aln	A	G	C	U	gap	Seq	Con
T	74.04	0.22	0.04	0.17	25.53	7169	0.626
3	82.92	0.23	0.03	0.05	16.77	6176	0.979
B	99.49	0.26	0	0.06	0.18	4928	1.943
A	98.64	0.45	0.9	0	0	221	1.884
C	95.86	0	0	2.96	1.18	169	1.692
E	0	0	0	0	100	1028	--
M	3	0.24	0.12	0.48	96.15	832	-0.199
Position: 197
Aln	A	G	C	U	gap	Seq	Con
T	73.83	0.21	0.07	0.32	25.57	7176	0.61
3	82.82	0.24	0.05	0.11	16.77	6183	0.97
B	99.35	0.28	0.04	0.14	0.18	4935	1.928
A	98.64	0.45	0.45	0	0.45	221	1.866
C	97.04	0	0.59	0.59	1.78	169	1.732
E	0	0	0	0	100	1028	--
M	1.56	0	0.12	1.8	96.51	832	-0.19
Position: 198
Aln	A	G	C	U	gap	Seq	Con
T	3.92	68.9	0.63	0.8	25.76	7167	0.326
3	3.79	77.97	0.6	0.73	16.91	6174	0.673
B	4.4	93.65	0.75	0.87	0.32	4927	1.567
A	7.73	90.91	0	0.91	0.45	220	1.483
C	20.12	69.82	4.14	3.55	2.37	169	0.636
E	0	0	0	0	100	1028	--
M	1.56	0.72	0.12	0.72	96.88	832	-0.19
Position: 199
Aln	A	G	C	U	gap	Seq	Con
T	26.31	18.4	18.45	5.6	31.24	7164	-0.788
3	29.57	19.45	21.33	6.42	23.24	6171	-0.663
B	36.62	22.83	24.96	7.45	8.14	4924	-0.254
A	10	34.55	39.55	13.18	2.73	220	0.027
C	24.85	69.23	2.37	0.59	2.96	169	0.752
E	0	0	0	0	100	1028	--
M	2.16	0.12	0.24	0.48	97	832	-0.172
Position: 200
Aln	A	G	C	U	gap	Seq	Con
T	12.79	12.49	5.66	8.08	60.98	7168	-0.937
3	13.08	14.33	6.48	8.69	57.42	6176	-0.956
B	15.87	17.49	7.22	10.63	48.78	4928	-0.96
A	11.82	10.45	20	5.91	51.82	220	-0.938
C	60.95	3.55	2.37	16.57	16.57	169	0.075
E	0	0	0	0	100	1028	--
M	0.72	0.48	0.24	1.68	96.88	832	-0.19
Position: 201
Aln	A	G	C	U	gap	Seq	Con
T	1.12	25.6	3.08	2.62	67.58	7171	-0.602
3	0.89	29.54	3.53	2.8	63.25	6179	-0.578
B	1.1	36.75	3.63	3.04	55.48	4930	-0.51
A	0.45	5.88	17.65	10.41	65.61	221	-0.768
C	6.51	4.14	0.59	6.51	82.25	169	-0.624
E	0	0	0	0	100	1028	--
M	1.68	0.48	0.24	0.48	97.12	832	-0.177
Position: 202
Aln	A	G	C	U	gap	Seq	Con
T	0.93	23.39	6.1	0.57	69	7175	-0.591
3	0.82	27.09	7.08	0.36	64.64	6183	-0.567
B	0.65	33.85	8.23	0.39	56.89	4934	-0.504
A	8.6	2.26	14.48	1.36	73.3	221	-0.71
C	0.59	0.59	0	8.88	89.94	169	-0.334
E	0	0	0	0	100	1028	--
M	1.8	0.24	0	0.48	97.48	832	-0.148
Position: 203
Aln	A	G	C	U	gap	Seq	Con
T	1.03	15.51	6.23	3.6	73.63	7176	-0.705
3	0.84	17.88	7.2	4.12	69.95	6184	-0.725
B	1.01	22.07	8.79	4.6	63.53	4935	-0.747
A	0.9	7.69	4.98	12.67	73.76	221	-0.738
C	2.37	3.55	0.59	1.18	92.31	169	-0.371
E	0	0	0	0	100	1028	--
M	2.16	0.12	0.12	0.12	97.48	832	-0.14
Position: 204
Aln	A	G	C	U	gap	Seq	Con
T	0.25	14.53	2.48	0.46	82.28	7172	-0.471
3	0.03	16.83	2.85	0.39	79.9	6180	-0.47
B	0.04	21.09	3.57	0.49	74.81	4931	-0.497
A	0	0	0	0	100	221	--
C	0.59	0.59	0	3.55	95.27	169	-0.231
E	0	0	0	0	100	1028	--
M	1.8	0.12	0.24	0.36	97.48	832	-0.152
Position: 205
Aln	A	G	C	U	gap	Seq	Con
T	14.34	0.22	0.56	2.26	82.62	7168	-0.467
3	16.4	0.19	0.62	2.49	80.29	6176	-0.483
B	20.56	0.24	0.77	3.13	75.3	4927	-0.515
A	0	0	0	0	100	221	--
C	1.18	0.59	0	0.59	97.63	169	-0.15
E	0	0	0	0	100	1028	--
M	1.56	0.36	0.24	0.84	97	832	-0.185
Position: 206
Aln	A	G	C	U	gap	Seq	Con
T	0.63	0.68	10.46	7.28	80.96	7183	-0.577
3	0.58	0.71	12.08	8.35	78.27	6191	-0.604
B	0.53	0.45	14.67	10.42	73.94	4942	-0.622
A	4.52	9.95	10.41	0.9	74.21	221	-0.738
C	2.96	0	0.59	0	96.45	169	-0.173
E	0	0	0	0	100	1028	--
M	0.48	0.6	0.24	0.72	97.96	832	-0.142
Position: 207
Aln	A	G	C	U	gap	Seq	Con
T	0.95	1.77	14.34	1.99	80.96	7183	-0.547
3	0.95	2.04	16.62	2.12	78.27	6191	-0.568
B	1.17	1.54	20.74	2.63	73.92	4942	-0.577
A	0.45	22.62	1.81	0.45	74.66	221	-0.468
C	1.78	0	0	1.78	96.45	169	-0.186
E	0	0	0	0	100	1028	--
M	0.72	0.12	0.12	1.08	97.96	832	-0.134
Position: 208
Aln	A	G	C	U	gap	Seq	Con
T	3.68	14.57	2.69	50.48	28.58	7167	-0.306
3	3.69	15.47	3.06	57.76	20.02	6174	-0.069
B	4.04	18.59	3.75	69.7	3.92	4927	0.56
A	13.18	17.73	1.82	60	7.27	220	0.204
C	15.98	51.48	2.37	26.63	3.55	169	0.206
E	0	0	0	0	100	1028	--
M	1.08	0.24	0	0.84	97.84	832	-0.137
Position: 209
Aln	A	G	C	U	gap	Seq	Con
T	7.07	1.78	12.12	53.03	26	7128	-0.253
3	7.07	1.34	13.97	60.64	16.98	6135	0.038
B	8.49	1.62	15.71	73.9	0.29	4889	0.83
A	8.68	1.37	40.64	48.86	0.46	219	0.532
C	37.87	25.44	2.96	29.59	4.14	169	0.024
E	0	0	0	0	100	1028	--
M	0.72	0.24	0.24	1.2	97.6	832	-0.156
Position: 210
Aln	A	G	C	U	gap	Seq	Con
T	15.64	1.67	20.03	36.72	25.94	7143	-0.536
3	15.96	1.85	23.17	42.14	16.88	6151	-0.314
B	19.25	2.26	26.64	51.64	0.2	4903	0.396
A	17.19	1.36	53.85	27.15	0.45	221	0.443
C	73.81	2.38	1.79	15.48	6.55	168	0.639
E	0	0	0	0	100	1028	--
M	1.32	0.12	0.36	0.6	97.6	832	-0.154
Position: 211
Aln	A	G	C	U	gap	Seq	Con
T	31.97	21.88	1.47	16.43	28.24	7156	-0.603
3	35.36	25.34	1.67	18.61	19.02	6163	-0.418
B	43.76	29.52	1.28	22.52	2.93	4916	0.186
A	12.73	50.45	18.18	18.18	0.45	220	0.185
C	59.76	1.78	1.18	13.02	24.26	169	0.013
E	0	0	0	0	100	1028	--
M	0.96	0.12	0	0.84	98.08	832	-0.123
Position: 212
Aln	A	G	C	U	gap	Seq	Con
T	1.18	15.23	1.33	1.51	80.74	7198	-0.528
3	1.24	17.6	1.51	1.56	78.09	6206	-0.545
B	1.55	21.91	1.27	1.55	73.71	4957	-0.545
A	0	2.71	14.03	9.05	74.21	221	-0.656
C	2.37	0	0	2.96	94.67	169	-0.246
E	0	0	0	0	100	1028	--
M	0.48	0.48	0.24	0.84	97.96	832	-0.141
Position: 213
Aln	A	G	C	U	gap	Seq	Con
T	7.16	10.64	0.63	0.75	80.83	7197	-0.58
3	8.14	12.3	0.69	0.73	78.15	6205	-0.609
B	10.13	14.93	0.42	0.73	73.79	4956	-0.629
A	1.36	10.41	9.95	4.07	74.21	221	-0.747
C	1.78	0.59	0.59	2.37	94.67	169	-0.287
E	0	0	0	0	100	1028	--
M	0.84	0.24	0.12	0.6	98.2	832	-0.125
Position: 214
Aln	A	G	C	U	gap	Seq	Con
T	1.22	8.38	15.59	0.97	73.84	7197	-0.66
3	1.27	9.69	18.02	0.98	70.04	6205	-0.678
B	1.17	11.83	22.18	1.17	63.65	4955	-0.684
A	9.5	6.33	8.6	1.36	74.21	221	-0.767
C	1.78	1.18	1.18	2.96	92.9	169	-0.362
E	0	0	0	0	100	1028	--
M	0.72	0	0.24	0.48	98.56	832	-0.101
Position: 215
Aln	A	G	C	U	gap	Seq	Con
T	0.79	5.95	23.2	1.06	69	7181	-0.605
3	0.63	6.85	26.87	1.15	64.5	6189	-0.592
B	0.69	7.98	33.49	1.05	56.79	4939	-0.538
A	2.26	13.57	3.62	8.6	71.95	221	-0.773
C	7.69	0.59	1.78	0.59	89.35	169	-0.408
E	0	0	0	0	100	1028	--
M	0.6	0.24	0	0.48	98.68	832	-0.095
Position: 216
Aln	A	G	C	U	gap	Seq	Con
T	2.1	3.69	4.19	22.57	67.45	7182	-0.701
3	2.21	4.05	4.7	25.93	63.1	6190	-0.703
B	2.39	4.11	5.75	32.4	55.35	4941	-0.661
A	8.64	21.82	3.18	1.36	65	220	-0.731
C	5.33	2.37	4.14	7.1	81.07	169	-0.681
E	0	0	0	0	100	1028	--
M	0.6	1.2	0.36	0.48	97.36	832	-0.172
Position: 217
Aln	A	G	C	U	gap	Seq	Con
T	6.88	6.88	11.22	13.85	61.17	7136	-0.938
3	7.45	7.71	12.96	14.24	57.63	6144	-0.958
B	9.09	8.72	15.85	17.32	49.01	4895	-0.965
A	5.45	21.36	9.09	12.27	51.82	220	-0.918
C	16.57	2.37	2.96	63.31	14.79	169	0.171
E	0	0	0	0	100	1028	--
M	0.6	1.56	0	0.72	97.12	832	-0.173
Position: 218
Aln	A	G	C	U	gap	Seq	Con
T	5.27	19.26	12.27	31.84	31.36	7166	-0.73
3	5.93	22.31	12.36	36.08	23.33	6173	-0.584
B	7.27	25.78	14.05	44.65	8.26	4927	-0.159
A	3.67	49.08	32.11	12.39	2.75	218	0.224
C	0.59	1.78	65.68	28.4	3.55	169	0.697
E	0	0	0	0	100	1028	--
M	1.32	0	0.6	0.84	97.24	832	-0.169
Position: 219
Aln	A	G	C	U	gap	Seq	Con
T	0.67	0.89	60.28	12.35	25.81	7180	0.058
3	0.66	0.89	68.21	13.35	16.89	6187	0.356
B	0.77	1.03	81.76	16.08	0.36	4939	1.18
A	0.91	1.82	82.27	14.55	0.45	220	1.153
C	2.37	5.33	62.72	26.04	3.55	169	0.477
E	0.1	0	0	0	99.9	1028	-0.009
M	0.36	0	0.24	2.04	97.36	832	-0.15
Position: 220
Aln	A	G	C	U	gap	Seq	Con
T	7.97	64.97	0.3	0.3	26.46	7369	0.218
3	9.09	73.81	0.24	0.32	16.54	6185	0.554
B	11.22	87.99	0.22	0.36	0.2	4936	1.412
A	0.45	98.64	0.45	0	0.45	220	1.865
C	8.33	89.29	0.6	0.6	1.19	168	1.367
E	0.68	0.39	0.29	0.19	98.45	1029	-0.113
M	1.07	7.13	0.59	0.1	91.11	1024	-0.34
Position: 221
Aln	A	G	C	U	gap	Seq	Con
T	2.3	32.13	49.38	3.35	12.84	7404	0.045
3	2.64	38.17	55.23	3.52	0.43	6219	0.646
B	0.7	31.67	64.17	3.12	0.34	4973	0.823
A	0	3.15	95.95	0.45	0.45	222	1.706
C	1.18	1.18	93.49	4.14	0	169	1.567
E	12.5	77.34	3.03	6.15	0.98	1024	0.853
M	0.39	0.29	6.15	2.15	91.02	1024	-0.366
Position: 222
Aln	A	G	C	U	gap	Seq	Con
T	5.03	8.63	25.68	48	12.66	7394	-0.165
3	5.89	10.23	27.83	55.85	0.21	6210	0.417
B	4.67	7.69	22.21	65.27	0.16	4967	0.607
A	0	0	87.61	9.63	2.75	218	1.31
C	0.59	0.59	94.08	4.73	0	169	1.621
E	13.07	24.68	42.34	19.9	0	1025	0.13
M	0.49	0.2	1.17	7.14	91.01	1023	-0.346
Position: 223
Aln	A	G	C	U	gap	Seq	Con
[truncated: 11,878 more rows]

## Sheet: 23S
Position: 1
Aln	A	G	C	U	gap	Seq	Con
T	9.64	42.17	2.61	5.02	40.56	498	-0.544
3	8.52	55.97	3.69	3.12	28.69	352	-0.194
B	10.04	76.31	1.2	3.61	8.84	249	0.633
A	8.33	19.44	25	0	47.22	36	-0.714
C	7.07	9.09	0	1.01	82.83	99	-0.533
E	2.99	0	1.49	2.99	92.54	67	-0.347
M	23.4	8.51	0	27.66	40.43	47	-0.642
Position: 2
Aln	A	G	C	U	gap	Seq	Con
T	23.42	30.35	3.87	8.15	34.22	491	-0.703
3	27.56	38.92	4.83	4.83	23.86	352	-0.435
B	37.75	53.41	0.8	5.62	2.41	249	0.519
A	0	8.33	41.67	2.78	47.22	36	-0.424
C	9.78	3.26	0	16.3	70.65	92	-0.683
E	4.48	1.49	0	2.99	91.04	67	-0.387
M	19.15	19.15	4.26	17.02	40.43	47	-0.879
Position: 3
Aln	A	G	C	U	gap	Seq	Con
T	8.97	4.71	16.59	47.53	22.2	446	-0.386
3	5.67	5.95	20.4	45.33	22.66	353	-0.401
B	5.22	7.63	24.5	60.24	2.41	249	0.379
A	2.78	5.56	30.56	25	36.11	36	-0.651
C	6.52	0	0	93.48	0	46	1.652
E	8.82	0	0	1.47	89.71	68	-0.333
M	36.17	0	4.26	19.15	40.43	47	-0.518
Position: 4
Aln	A	G	C	U	gap	Seq	Con
T	8.72	3.8	37.58	29.53	20.36	447	-0.411
3	7.06	3.11	36.44	33.05	20.34	354	-0.358
B	3.21	0.8	50.2	43.78	2.01	249	0.611
A	38.89	16.67	11.11	16.67	16.67	36	-0.508
C	8.7	2.17	82.61	6.52	0	46	1.089
E	4.35	4.35	0	2.9	88.41	69	-0.467
M	21.28	10.64	2.13	25.53	40.43	47	-0.777
Position: 5
Aln	A	G	C	U	gap	Seq	Con
T	67.19	6.47	2.23	4.24	19.87	448	0.183
3	68.73	7.04	1.97	2.54	19.72	355	0.256
B	95.98	1.61	0.4	0.4	1.61	249	1.656
A	11.11	55.56	13.89	5.56	13.89	36	-0.124
C	95.65	0	2.17	2.17	0	46	1.699
E	1.43	1.43	1.43	8.57	87.14	70	-0.482
M	27.66	8.51	4.26	19.15	40.43	47	-0.803
Position: 6
Aln	A	G	C	U	gap	Seq	Con
T	68.08	7.37	0.45	4.91	19.2	448	0.256
3	70.42	8.17	0.56	1.97	18.87	355	0.363
B	98.39	0.8	0	0	0.8	249	1.849
A	2.78	72.22	2.78	8.33	13.89	36	0.402
C	95.65	0	0	4.35	0	46	1.742
E	5.71	1.43	1.43	5.71	85.71	70	-0.552
M	23.4	8.51	0	27.66	40.43	47	-0.642
Position: 7
Aln	A	G	C	U	gap	Seq	Con
T	15.11	59.33	4.67	4.22	16.67	450	-0.022
3	4.48	71.15	5.32	3.36	15.69	357	0.327
B	3.23	95.16	0.4	0.4	0.81	248	1.636
A	2.78	50	44.44	2.78	0	36	0.693
C	80.43	15.22	0	4.35	0	46	1.137
E	9.59	0	2.74	13.7	73.97	73	-0.661
M	31.91	12.77	4.26	10.64	40.43	47	-0.779
Position: 8
Aln	A	G	C	U	gap	Seq	Con
T	8.1	6.35	22.32	48.58	14.66	457	-0.234
3	5.77	6.87	24.18	50.27	12.91	364	-0.136
B	1.2	3.21	29.72	65.06	0.8	249	0.768
A	2.78	30.56	25	38.89	2.78	36	0.105
C	10.87	2.17	28.26	58.7	0	46	0.566
E	21.52	7.59	6.33	8.86	55.7	79	-0.905
M	23.4	6.38	2.13	25.53	42.55	47	-0.74
Position: 9
Aln	A	G	C	U	gap	Seq	Con
T	10.65	30.43	1.96	37.17	19.78	460	-0.366
3	11.23	26.03	2.19	43.84	16.71	365	-0.268
B	4.84	35.48	0	59.27	0.4	248	0.771
A	16.67	0	16.67	8.33	58.33	36	-0.781
C	0	86.96	0	13.04	0	46	1.441
E	28.4	8.64	2.47	12.35	48.15	81	-0.796
M	16.33	10.2	2.04	10.2	61.22	49	-0.871
Position: 10
Aln	A	G	C	U	gap	Seq	Con
T	55.97	7.16	4.99	10.63	21.26	461	-0.201
3	54.64	8.74	5.19	11.2	20.22	366	-0.23
B	74.3	9.64	6.02	9.64	0.4	249	0.747
A	8.33	0	0	8.33	83.33	36	-0.483
C	100	0	0	0	0	46	2
E	14.81	9.88	4.94	17.28	53.09	81	-0.937
M	24.49	2.04	8.16	16.33	48.98	49	-0.818
Position: 11
Aln	A	G	C	U	gap	Seq	Con
T	32.29	14.87	24.85	16.63	11.35	511	-0.448
3	29.73	17.3	25.41	16.49	11.08	370	-0.462
B	24.1	22.89	30.92	20.88	1.2	249	-0.078
A	55.56	8.33	25	11.11	0	36	0.378
C	67.39	21.74	2.17	8.7	0	46	0.711
E	35.29	4.71	9.41	5.88	44.71	85	-0.712
M	26.04	2.08	33.33	20.83	17.71	96	-0.418
Position: 12
Aln	A	G	C	U	gap	Seq	Con
T	24.27	5.11	16.97	47.63	6.02	548	-0.023
3	21.84	3.72	19.85	49.63	4.96	403	0.065
B	17.67	5.62	4.82	71.08	0.8	249	0.692
A	11.11	0	72.22	16.67	0	36	0.878
C	6.52	28.26	23.91	41.3	0	46	0.207
E	33.9	0.85	35.59	14.41	15.25	118	-0.239
M	42.42	0	2.02	42.42	13.13	99	0.189
Position: 13
Aln	A	G	C	U	gap	Seq	Con
T	69.53	11.5	4.56	11.68	2.74	548	0.515
3	79.85	6.97	4.23	8.46	0.5	402	0.931
B	99.6	0	0.4	0	0	248	1.962
A	0	16.67	22.22	61.11	0	36	0.653
C	52.17	2.17	4.35	41.3	0	46	0.667
E	62.71	18.64	6.78	10.17	1.69	118	0.394
M	36	34	6	11	13	100	-0.296
Position: 14
Aln	A	G	C	U	gap	Seq	Con
T	88.75	1.58	2.64	4.57	2.46	569	1.23
3	94.04	1.49	1.49	2.73	0.25	403	1.568
B	98.79	0.81	0.4	0	0	248	1.894
A	91.67	8.33	0	0	0	36	1.586
C	100	0	0	0	0	46	2
E	84.87	0.84	4.2	9.24	0.84	119	1.157
M	66.67	2.5	7.5	12.5	10.83	120	0.258
Position: 15
Aln	A	G	C	U	gap	Seq	Con
T	20.24	58.2	14.62	5.32	1.62	677	0.319
3	4.44	64.94	24.2	6.17	0.25	405	0.626
B	0	99.2	0	0.8	0	250	1.933
A	33.33	5.56	13.89	47.22	0	36	0.333
C	67.39	26.09	0	6.52	0	46	0.854
E	5.04	10.92	78.15	5.04	0.84	119	0.864
M	38.94	52.65	0.44	3.54	4.42	226	0.49
Position: 16
Aln	A	G	C	U	gap	Seq	Con
T	16.1	30.87	32.05	19.35	1.62	677	-0.061
3	17.62	41.19	14.39	26.55	0.25	403	0.095
B	27.82	49.19	14.52	8.47	0	248	0.277
A	0	83.33	13.89	2.78	0	36	1.242
C	30.43	69.57	0	0	0	46	1.113
E	1.68	11.76	14.29	71.43	0.84	119	0.715
M	10.53	4.82	69.74	10.53	4.39	228	0.457
Position: 17
Aln	A	G	C	U	gap	Seq	Con
T	2.36	48.16	12.81	10.01	26.66	679	-0.389
3	0.49	62.72	20.49	16.05	0.25	405	0.621
B	0	100	0	0	0	250	2
A	0	5.56	94.44	0	0	36	1.69
C	2.17	93.48	4.35	0	0	46	1.592
E	1.68	1.68	41.18	54.62	0.84	119	0.723
M	5.7	13.16	0.88	1.32	78.95	228	-0.611
Position: 18
Aln	A	G	C	U	gap	Seq	Con
T	2.35	3.24	44.56	22.79	27.06	680	-0.345
3	0.99	3.45	60.59	34.73	0.25	406	0.773
B	0.4	0	80.88	18.73	0	251	1.268
A	0	0	94.44	5.56	0	36	1.69
C	2.17	8.7	84.78	4.35	0	46	1.175
E	2.52	11.76	7.56	77.31	0.84	119	0.859
M	4.82	1.75	7.89	5.26	80.26	228	-0.686
Position: 19
Aln	A	G	C	U	gap	Seq	Con
T	21.32	19.26	11.03	21.18	27.21	680	-0.813
3	28.82	29.06	16.5	25.37	0.25	406	0.007
B	33.07	39.04	3.19	24.7	0	251	0.286
A	47.22	41.67	0	11.11	0	36	0.61
C	10.87	23.91	0	65.22	0	46	0.756
E	14.29	4.2	49.58	31.09	0.84	119	0.306
M	10.09	0.88	3.51	4.82	80.7	228	-0.638
Position: 20
Aln	A	G	C	U	gap	Seq	Con
T	21.76	5.44	22.65	22.79	27.35	680	-0.737
3	33	8.87	36.7	20.94	0.49	406	0.112
B	22.71	1.99	46.22	28.69	0.4	251	0.331
A	8.33	30.56	47.22	13.89	0	36	0.272
C	4.35	0	0	95.65	0	46	1.742
E	62.18	16.81	13.45	6.72	0.84	119	0.416
M	5.26	0.44	2.19	11.4	80.7	228	-0.6
Position: 21
Aln	A	G	C	U	gap	Seq	Con
T	36.18	14.12	6.91	15.29	27.5	680	-0.672
3	46.55	22.66	10.84	19.7	0.25	406	0.166
B	59.36	9.96	1.99	28.69	0	251	0.593
A	0	0	88.89	11.11	0	36	1.497
C	91.3	6.52	0	2.17	0	46	1.503
E	33.61	56.3	5.88	3.36	0.84	119	0.525
M	6.58	0.44	1.32	10.09	81.58	228	-0.58
Position: 22
Aln	A	G	C	U	gap	Seq	Con
T	3.83	1.91	41.38	25.04	27.84	679	-0.387
3	2.47	0.49	60.49	36.05	0.49	405	0.813
B	3.2	0.8	44.4	51.2	0.4	250	0.731
A	5.56	0	52.78	41.67	0	36	0.755
C	10.87	6.52	63.04	19.57	0	46	0.515
E	0	0	96.64	2.52	0.84	119	1.744
M	4.82	3.51	3.07	6.58	82.02	228	-0.668
Position: 23
Aln	A	G	C	U	gap	Seq	Con
T	13.09	57.35	0.44	1.47	27.65	680	-0.034
3	16.75	82.76	0	0.25	0.25	406	1.295
B	0.4	99.6	0	0	0	251	1.963
A	5.56	94.44	0	0	0	36	1.69
C	6.52	93.48	0	0	0	46	1.652
E	54.62	43.7	0	0.84	0.84	119	0.869
M	7.89	4.82	1.32	3.95	82.02	228	-0.641
Position: 24
Aln	A	G	C	U	gap	Seq	Con
T	16.79	52.87	0.59	1.91	27.84	679	-0.142
3	19.26	77.53	0.74	2.22	0.25	405	1.057
B	1.6	98.4	0	0	0	250	1.882
A	0	100	0	0	0	36	2
C	8.7	80.43	2.17	8.7	0	46	1.014
E	62.18	26.89	2.52	7.56	0.84	119	0.574
M	14.04	3.51	0	0	82.46	228	-0.446
Position: 25
Aln	A	G	C	U	gap	Seq	Con
T	2.79	5	19.85	56.62	15.74	680	-0.023
3	0.74	6.4	15.02	77.59	0.25	406	0.973
B	0	1.59	6.77	91.63	0	251	1.526
A	8.33	22.22	0	69.44	0	36	0.854
C	6.52	8.7	23.91	60.87	0	46	0.507
E	0	11.76	36.97	50.42	0.84	119	0.533
M	5.7	1.75	27.63	18.42	46.49	228	-0.744
Position: 26
Aln	A	G	C	U	gap	Seq	Con
T	8.38	73.68	2.21	1.76	13.97	680	0.475
3	0	99.75	0	0	0.25	406	1.97
B	0	100	0	0	0	251	2
A	0	100	0	0	0	36	2
C	0	100	0	0	0	46	2
E	0	99.16	0	0	0.84	119	1.913
M	25	21.93	6.58	5.26	41.23	228	-0.813
Position: 27
Aln	A	G	C	U	gap	Seq	Con
T	14.12	68.24	5.15	8.97	3.53	680	0.452
3	4.19	95.32	0	0	0.49	406	1.695
B	5.58	94.42	0	0	0	251	1.69
A	5.56	94.44	0	0	0	36	1.69
C	4.35	95.65	0	0	0	46	1.742
E	0.84	97.48	0	0	1.68	119	1.773
M	33.77	14.47	15.35	26.75	9.65	228	-0.375
Position: 28
Aln	A	G	C	U	gap	Seq	Con
T	91.18	0.59	4.26	1.91	2.06	680	1.375
3	99.75	0	0	0	0.25	406	1.97
B	100	0	0	0	0	251	2
A	100	0	0	0	0	36	2
C	100	0	0	0	0	46	2
E	99.16	0	0	0	0.84	119	1.913
M	74.12	1.75	12.72	5.7	5.7	228	0.614
Position: 29
Aln	A	G	C	U	gap	Seq	Con
T	11.89	3.82	8.81	72.83	2.64	681	0.622
3	0	0.25	0	99.26	0.49	406	1.92
B	0	0	0	100	0	251	2
A	0	0	0	100	0	36	2
C	0	34.78	0	65.22	0	46	1.068
E	0	0.84	0	97.48	1.68	119	1.773
M	35.37	3.93	26.2	27.51	6.99	229	-0.14
Position: 30
Aln	A	G	C	U	gap	Seq	Con
T	27.75	51.1	12.92	6.17	2.06	681	0.206
3	6.4	77.09	13.05	2.96	0.49	406	0.876
B	1.2	98.8	0	0	0	250	1.906
A	8.33	75	2.78	13.89	0	36	0.851
C	86.96	6.52	0	6.52	0	46	1.311
E	16.67	32.5	43.33	5.83	1.67	120	0.148
M	53.71	13.97	15.28	11.79	5.24	229	0.016
Position: 31
Aln	A	G	C	U	gap	Seq	Con
T	9.21	18.27	51.75	19.15	1.61	684	0.159
3	8.37	11.08	62.81	17.49	0.25	406	0.461
B	0	0	98.8	1.2	0	251	1.907
A	0	100	0	0	0	36	2
C	0	6.52	86.96	6.52	0	46	1.311
E	28.57	7.56	5.88	57.14	0.84	119	0.425
M	12.5	33.19	25.43	24.57	4.31	232	-0.185
Position: 32
Aln	A	G	C	U	gap	Seq	Con
T	2.63	0.29	92.84	2.63	1.61	684	1.472
3	2.71	0.25	96.31	0.49	0.25	406	1.721
B	0	0	100	0	0	251	2
A	0	0	100	0	0	36	2
C	0	0	100	0	0	46	2
E	9.24	0.84	87.39	1.68	0.84	119	1.281
M	3.02	0.43	85.34	6.9	4.31	232	1.071
Position: 33
Aln	A	G	C	U	gap	Seq	Con
T	2.2	0	3.52	92.67	1.61	682	1.479
3	0.25	0	3.96	95.54	0.25	404	1.705
B	0	0	6.4	93.6	0	250	1.657
A	0	0	0	100	0	36	2
C	0	0	0	100	0	46	2
E	0.85	0	0	98.31	0.85	118	1.842
M	6.03	0	3.45	86.21	4.31	232	1.122
Position: 34
Aln	A	G	C	U	gap	Seq	Con
T	39.88	1.61	9.53	47.36	1.61	682	0.413
3	9.65	1.24	15.59	73.27	0.25	404	0.823
B	9.2	1.2	1.2	88.4	0	250	1.373
A	5.56	0	80.56	13.89	0	36	1.121
C	80.43	0	0	19.57	0	46	1.287
E	11.86	1.69	26.27	59.32	0.85	118	0.507
M	84.48	2.59	0.86	7.76	4.31	232	1.031
Position: 35
Aln	A	G	C	U	gap	Seq	Con
T	2.05	94.74	0.15	1.17	1.9	684	1.576
3	0.25	99.01	0	0	0.74	405	1.897
B	0	100	0	0	0	251	2
A	0	100	0	0	0	36	2
C	2.17	97.83	0	0	0	46	1.849
E	0.85	96.61	0	0	2.54	118	1.708
M	5.15	86.7	0.43	3.43	4.29	233	1.119
Position: 36
Aln	A	G	C	U	gap	Seq	Con
T	3.94	66.72	25.99	1.17	2.19	685	0.682
3	2.46	95.81	1.23	0	0.49	406	1.684
B	3.59	94.82	1.59	0	0	251	1.66
A	0	100	0	0	0	36	2
C	2.17	97.83	0	0	0	46	1.849
E	0.84	96.64	0.84	0	1.68	119	1.704
M	6.87	9.87	74.25	3.43	5.58	233	0.575
Position: 37
Aln	A	G	C	U	gap	Seq	Con
T	3.66	1.76	75.84	16.69	2.05	683	0.833
3	2.48	1.98	88.86	6.44	0.25	404	1.323
B	2.4	1.6	94.8	1.2	0	250	1.626
A	0	0	94.44	5.56	0	36	1.69
C	0	0	89.13	10.87	0	46	1.504
E	3.39	3.39	74.58	17.8	0.85	118	0.835
M	6.44	1.72	50.64	35.62	5.58	233	0.273
Position: 38
Aln	A	G	C	U	gap	Seq	Con
T	42.02	6.88	15.81	32.94	2.34	683	0.086
3	50.99	10.15	0.99	37.62	0.25	404	0.547
B	79.6	16	0	4.4	0	250	1.117
A	0	0	0	100	0	36	2
C	95.65	2.17	0	2.17	0	46	1.699
E	5.93	0.85	3.39	88.98	0.85	118	1.309
M	15.88	2.15	44.64	30.9	6.44	233	0.033
Position: 39
Aln	A	G	C	U	gap	Seq	Con
T	19.47	7.7	42.02	23.11	7.7	714	-0.197
3	9.9	10.4	55.2	24.26	0.25	404	0.335
B	13.6	16.8	40.8	28.8	0	250	0.131
A	0	0	80.56	19.44	0	36	1.289
C	0	0	74.03	25.97	0	77	1.174
E	5.08	0	77.97	16.1	0.85	118	1.002
M	42.49	5.58	8.58	20.17	23.18	233	-0.479
Position: 40
Aln	A	G	C	U	gap	Seq	Con
T	6.44	10.36	18.63	38.8	25.77	714	-0.595
3	6.68	17.08	23.02	52.97	0.25	404	0.304
B	4	3.6	22	70.4	0	250	0.805
A	8.33	91.67	0	0	0	36	1.586
C	0	0	50.65	49.35	0	77	1
E	11.86	22.88	32.2	32.2	0.85	118	0.02
M	8.15	2.15	0.43	10.73	78.54	233	-0.638
Position: 41
Aln	A	G	C	U	gap	Seq	Con
T	18.49	16.53	28.29	10.22	26.47	714	-0.768
3	28.22	27.72	33.91	9.9	0.25	404	0.086
B	39.2	30.8	25.2	4.8	0	250	0.236
A	25	75	0	0	0	36	1.189
C	0	0	79.22	20.78	0	77	1.263
E	5.93	6.78	62.71	23.73	0.85	118	0.505
M	7.73	2.58	1.72	7.3	80.69	233	-0.661
Position: 42
Aln	A	G	C	U	gap	Seq	Con
T	41.32	28.01	0.7	3.5	26.47	714	-0.298
3	47.28	47.77	0.25	4.46	0.25	404	0.732
B	63.2	34.4	0	2.4	0	250	0.923
A	5.56	94.44	0	0	0	36	1.69
C	97.4	0	0	2.6	0	77	1.826
E	26.27	61.86	0.85	10.17	0.85	118	0.596
M	12.45	3	1.72	2.15	80.69	233	-0.609
Position: 43
Aln	A	G	C	U	gap	Seq	Con
T	9.76	33.47	21.2	4.74	30.82	717	-0.679
3	10.37	38.77	37.28	5.43	8.15	405	-0.086
B	12.4	58	27.2	1.6	0.8	250	0.493
A	2.78	11.11	0	8.33	77.78	36	-0.632
C	10.13	88.61	0	1.27	0	79	1.431
E	8.4	6.72	69.75	12.61	2.52	119	0.514
M	8.58	5.58	0.43	4.72	80.69	233	-0.642
Position: 44
Aln	A	G	C	U	gap	Seq	Con
T	58.24	5.59	4.33	5.31	26.54	716	-0.146
3	80.69	7.67	7.43	3.96	0.25	404	0.977
B	99.6	0.4	0	0	0	250	1.962
A	5.56	5.56	80.56	8.33	0	36	0.987
C	96.2	2.53	0	1.27	0	79	1.732
E	63.56	23.73	0.85	11.02	0.85	118	0.608
M	6.44	3	0.43	9.01	81.12	233	-0.621
Position: 45
Aln	A	G	C	U	gap	Seq	Con
T	10.47	49.86	0.56	12.15	26.96	716	-0.302
3	10.4	71.04	0.74	17.08	0.74	404	0.755
B	2.41	97.19	0.4	0	0	249	1.799
A	13.89	86.11	0	0	0	36	1.419
C	13.92	86.08	0	0	0	79	1.418
E	26.05	11.76	1.68	57.98	2.52	119	0.392
M	9.44	0.86	0.43	7.73	81.55	233	-0.57
Position: 46
Aln	A	G	C	U	gap	Seq	Con
T	11.02	25.24	16.88	4.6	42.26	717	-0.86
3	0	40.49	28.4	4.2	26.91	405	-0.284
B	0	64.8	32.4	2.8	0	250	0.923
A	0	5.56	94.44	0	0	36	1.69
C	82.28	10.13	2.53	5.06	0	79	1.082
E	0	0	0	8.4	91.6	119	-0.248
M	6.01	3.86	1.72	5.15	83.26	233	-0.631
Position: 47
Aln	A	G	C	U	gap	Seq	Con
T	3.63	0.98	64.94	2.79	27.65	716	0.147
3	0.5	0	96.04	3.22	0.25	404	1.72
B	0	0	98.8	1.2	0	250	1.906
A	5.56	0	69.44	25	0	36	0.903
C	1.27	0	97.47	1.27	0	79	1.804
E	0	0	98.31	0.85	0.85	118	1.842
M	9.87	3	0	2.58	84.55	233	-0.513
Position: 48
Aln	A	G	C	U	gap	Seq	Con
T	1.82	68.02	0.14	0.84	29.19	716	0.343
3	0	99.26	0.25	0.25	0.25	404	1.92
B	0	99.2	0.4	0.4	0	250	1.925
A	0	100	0	0	0	36	2
C	0	98.73	0	1.27	0	79	1.902
E	0	99.15	0	0	0.85	118	1.913
M	5.58	3.43	0	1.72	89.27	233	-0.432
Position: 49
Aln	A	G	C	U	gap	Seq	Con
T	66.9	0.98	0	1.68	30.45	716	0.317
3	97.28	0.25	0	2.23	0.25	404	1.791
B	99.6	0.4	0	0	0	250	1.962
A	100	0	0	0	0	36	2
C	100	0	0	0	0	79	2
E	91.53	0	0	7.63	0.85	118	1.525
M	3	2.58	0	1.29	93.13	233	-0.327
Position: 50
Aln	A	G	C	U	gap	Seq	Con
T	10.45	4.74	3.76	50.56	30.5	718	-0.357
3	12.35	4.2	5.68	77.53	0.25	405	0.889
B	16.27	0.4	3.17	80.16	0	252	1.128
A	22.86	28.57	22.86	25.71	0	35	0.006
C	25	13.75	1.25	60	0	80	0.585
E	0.85	5.08	5.93	87.29	0.85	118	1.235
M	2.15	2.58	1.29	0.43	93.56	233	-0.331
Position: 51
Aln	A	G	C	U	gap	Seq	Con
T	0.56	67.78	0.42	0.56	30.69	720	0.367
3	0	99.51	0	0	0.49	407	1.945
B	0	99.6	0	0	0.4	253	1.955
A	0	100	0	0	0	36	2
C	0	100	0	0	0	80	2
E	0	99.15	0	0	0.85	118	1.913
M	1.72	1.29	1.29	1.72	93.99	233	-0.327
Position: 52
Aln	A	G	C	U	gap	Seq	Con
T	67.92	0.28	0.14	0.83	30.83	720	0.387
3	99.26	0.25	0.25	0	0.25	406	1.92
B	99.21	0.4	0.4	0	0	252	1.925
A	100	0	0	0	0	36	2
C	100	0	0	0	0	81	2
E	99.15	0	0	0	0.85	118	1.913
M	2.15	0.43	0	2.58	94.85	233	-0.258
Position: 53
Aln	A	G	C	U	gap	Seq	Con
T	70.14	0.14	0.42	2.22	27.08	720	0.421
3	99.01	0.25	0.49	0	0.25	406	1.9
B	100	0	0	0	0	252	2
A	94.44	0	5.56	0	0	36	1.69
C	100	0	0	0	0	81	2
E	98.31	0.85	0	0	0.85	118	1.842
M	9.44	0	0.43	6.87	83.26	233	-0.506
Position: 54
Aln	A	G	C	U	gap	Seq	Con
T	3.19	68.79	0.14	0.83	27.05	721	0.348
3	2.46	97.3	0	0	0.25	407	1.804
B	3.95	96.05	0	0	0	253	1.76
A	0	100	0	0	0	36	2
C	1.23	98.77	0	0	0	81	1.904
E	0	99.15	0	0	0.85	118	1.913
M	5.15	8.58	0.43	2.58	83.26	233	-0.579
Position: 55
Aln	A	G	C	U	gap	Seq	Con
T	13.09	59.64	0.55	0	26.72	726	0.087
3	21.38	78.13	0.25	0	0.25	407	1.199
B	0	100	0	0	0	253	2
A	0	100	0	0	0	36	2
C	0	100	0	0	0	86	2
E	73.73	24.58	0.85	0	0.85	118	1.045
M	3.43	12.45	1.29	0	82.83	233	-0.504
Position: 56
Aln	A	G	C	U	gap	Seq	Con
T	51.03	16.64	2.2	3.16	26.96	727	-0.254
3	83.82	9.07	3.68	2.94	0.49	408	1.1
B	94.07	3.56	0	2.37	0	253	1.618
A	30.56	55.56	13.89	0	0	36	0.611
C	5.81	94.19	0	0	0	86	1.68
E	78.15	6.72	8.4	5.04	1.68	119	0.81
M	10.3	1.29	0.43	4.72	83.26	233	-0.546
Position: 57
Aln	A	G	C	U	gap	Seq	Con
T	1.65	0.28	65.98	5.23	26.86	726	0.214
3	0	0	91.63	8.13	0.25	406	1.564
B	0	0	86.9	13.1	0	252	1.44
A	0	0	100	0	0	36	2
C	0	0	97.7	2.3	0	87	1.842
E	0	0	99.15	0	0.85	118	1.913
M	5.15	0.86	9.44	1.29	83.26	233	-0.567
Position: 58
Aln	A	G	C	U	gap	Seq	Con
T	1.22	71.29	0	1.09	26.39	735	0.468
3	0.49	99.26	0	0.25	0	408	1.931
B	0	100	0	0	0	254	2
A	0	100	0	0	0	36	2
C	0	100	0	0	0	94	2
E	1.69	97.46	0	0.85	0	118	1.806
M	3	10.73	0	3	83.26	233	-0.535
Position: 59
Aln	A	G	C	U	gap	Seq	Con
T	1.63	4.63	29.8	37.55	26.39	735	-0.388
3	0	8.33	40.93	50.74	0	408	0.677
B	0	13.39	27.17	59.45	0	254	0.655
A	0	0	19.44	80.56	0	36	1.289
C	0	0	45.74	54.26	0	94	1.005
E	0	0	77.12	22.88	0	118	1.224
M	5.15	0	3.86	7.73	83.26	233	-0.572
Position: 60
Aln	A	G	C	U	gap	Seq	Con
T	28.12	40.35	1.09	3.4	27.04	736	-0.331
3	33.25	64.06	0.24	1.96	0.49	409	0.881
B	12.6	84.25	0.39	2.36	0.39	254	1.217
A	0	100	0	0	0	36	2
C	63.83	29.79	2.13	2.13	2.13	94	0.669
E	87.39	10.08	0	1.68	0.84	119	1.323
M	4.72	3	2.15	6.44	83.69	233	-0.622
Position: 61
Aln	A	G	C	U	gap	Seq	Con
T	15.1	40.82	9.25	7.35	27.48	735	-0.596
3	22.79	52.45	15.2	9.56	0	408	0.289
B	34.25	32.68	18.5	14.57	0	254	0.088
A	0	69.44	30.56	0	0	36	1.112
C	8.51	85.11	3.19	2.13	1.06	94	1.132
E	5.08	89.83	3.39	1.69	0	118	1.377
M	4.29	2.58	1.29	5.58	86.27	233	-0.553
Position: 62
Aln	A	G	C	U	gap	Seq	Con
T	14.61	4.6	30.45	23.68	26.66	739	-0.666
3	8.03	7.06	50.12	34.79	0	411	0.409
B	10.51	10.89	27.24	51.36	0	257	0.305
A	0	0	97.22	2.78	0	36	1.817
C	64.21	1.05	14.74	20	0	95	0.649
E	5.08	0.85	85.59	8.47	0	118	1.229
M	6.01	1.72	2.15	5.58	84.55	233	-0.591
Position: 63
Aln	A	G	C	U	gap	Seq	Con
T	35.22	14.04	2.16	22.13	26.45	741	-0.565
3	49.51	23.54	0.73	25.97	0.24	412	0.424
B	55.64	8.56	0.39	35.41	0	257	0.664
A	100	0	0	0	0	36	2
C	44.79	1.04	1.04	53.12	0	96	0.859
E	21.01	63.03	1.68	13.45	0.84	119	0.544
M	6.01	2.58	5.15	2.58	83.69	233	-0.625
Position: 64
Aln	A	G	C	U	gap	Seq	Con
T	55.87	11.2	4.18	1.48	27.26	741	-0.161
3	74.03	18.93	5.58	1.21	0.24	412	0.889
B	67.7	22.96	8.17	1.17	0	257	0.761
A	100	0	0	0	0	36	2
C	94.79	1.04	0	1.04	3.12	96	1.571
E	79.83	15.97	1.68	1.68	0.84	119	1.045
M	7.73	1.72	3.43	2.15	84.98	233	-0.571
Position: 65
Aln	A	G	C	U	gap	Seq	Con
T	24.29	17	24.7	5.8	28.21	741	-0.746
3	40.29	26.7	25	7.52	0.49	412	0.135
B	24.12	24.51	39.69	11.67	0	257	0.117
A	0	100	0	0	0	36	2
C	2.08	8.33	81.25	7.29	1.04	96	0.977
E	87.39	9.24	0.84	0.84	1.68	119	1.264
M	5.15	3.43	0.86	2.15	88.41	233	-0.491
Position: 66
Aln	A	G	C	U	gap	Seq	Con
T	11.05	4.31	52.83	3.91	27.9	742	-0.288
3	16.22	6.05	72.88	4.36	0.48	413	0.753
B	0.78	0.78	94.55	3.89	0	257	1.632
A	0	0	94.44	5.56	0	36	1.69
C	0	0	93.75	6.25	0	96	1.663
E	54.17	19.17	20	5	1.67	120	0.252
M	6.44	3	0.43	2.15	87.98	233	-0.482
Position: 67
Aln	A	G	C	U	gap	Seq	Con
T	7.83	17.41	2.97	44.8	26.99	741	-0.446
3	8.5	8.74	3.88	77.91	0.97	412	0.844
B	10.55	9.77	3.12	76.17	0.39	256	0.836
A	8.33	13.89	0	75	2.78	36	0.795
C	10.42	84.38	2.08	3.12	0	96	1.181
E	4.17	5	6.67	82.5	1.67	120	0.972
M	5.58	5.15	1.72	3.43	84.12	233	-0.613
Position: 68
Aln	A	G	C	U	gap	Seq	Con
T	14.4	53.03	4.71	1.48	26.38	743	-0.22
3	9.9	81.16	8.21	0.24	0.48	414	1.061
B	11.24	75.58	13.18	0	0	258	0.955
A	0	100	0	0	0	36	2
C	53.12	46.88	0	0	0	96	1.003
E	10	87.5	0	0.83	1.67	120	1.31
M	6.44	5.58	0.43	4.29	83.26	233	-0.601
Position: 69
Aln	A	G	C	U	gap	Seq	Con
T	1.08	0.13	71.33	1.08	26.38	743	0.464
3	0	0.24	98.3	0.97	0.49	412	1.843
B	0	0	100	0	0	256	2
A	0	0	100	0	0	36	2
C	0	0	100	0	0	98	2
E	0	0.83	94.17	3.33	1.67	120	1.565
M	3.43	0	11.59	1.72	83.26	233	-0.513
Position: 70
Aln	A	G	C	U	gap	Seq	Con
T	4.97	66.85	0.27	1.48	26.44	745	0.247
3	7.73	91.55	0	0	0.72	414	1.532
B	12.4	87.6	0	0	0	258	1.459
A	0	100	0	0	0	36	2
C	0	100	0	0	0	98	2
E	0	97.5	0	0	2.5	120	1.781
M	2.15	9.01	0.86	4.72	83.26	233	-0.584
Position: 71
Aln	A	G	C	U	gap	Seq	Con
T	66.22	4.16	0.8	2.01	26.81	746	0.201
3	89.13	6.28	1.21	2.9	0.48	414	1.329
B	85.66	10.08	0	4.26	0	258	1.281
A	100	0	0	0	0	36	2
C	98.98	0	0	1.02	0	98	1.918
E	93.33	0	4.17	0.83	1.67	120	1.527
M	11.97	2.14	0.43	0.85	84.62	234	-0.474
Position: 72
Aln	A	G	C	U	gap	Seq	Con
T	27.75	2.82	0.27	42.9	26.27	746	-0.237
3	26.81	5.07	0.24	67.39	0.48	414	0.821
B	34.5	0	0	65.5	0	258	1.071
A	25	0	0	75	0	36	1.189
C	67.35	0	0	32.65	0	98	1.089
E	10.83	17.5	0.83	69.17	1.67	120	0.655
M	12.82	0	0.43	3.85	82.91	234	-0.477
Position: 73
Aln	A	G	C	U	gap	Seq	Con
T	71.98	0	0.27	1.47	26.27	746	0.514
3	98.07	0	0	1.45	0.48	414	1.837
B	100	0	0	0	0	258	2
A	100	0	0	0	0	36	2
C	98.98	0	1.02	0	0	98	1.918
E	93.33	0	0	5	1.67	120	1.559
M	14.53	0	0.43	2.14	82.91	234	-0.439
Position: 74
Aln	A	G	C	U	gap	Seq	Con
T	36.86	3.08	17.83	15.55	26.68	746	-0.589
3	61.59	3.62	16.18	17.63	0.97	414	0.445
B	73.26	2.71	3.1	20.93	0	258	0.902
A	75	0	2.78	22.22	0	36	1.063
C	5.1	2.04	63.27	29.59	0	98	0.729
E	32.5	6.67	48.33	9.17	3.33	120	0.159
M	6.41	2.56	1.71	5.98	83.33	234	-0.619
Position: 75
Aln	A	G	C	U	gap	Seq	Con
T	3.08	59.12	1.34	9.12	27.35	746	-0.06
3	1.69	80.68	1.45	14.25	1.93	414	1.013
B	0	84.88	0.39	14.73	0	258	1.361
A	0	100	0	0	0	36	2
C	5.1	92.86	1.02	0	1.02	98	1.526
E	5.83	65.83	4.17	17.5	6.67	120	0.339
M	4.7	6.84	1.28	3.85	83.33	234	-0.619
Position: 76
Aln	A	G	C	U	gap	Seq	Con
T	1.07	1.61	56.03	13.94	27.35	746	-0.089
3	0.24	1.45	76.33	20.05	1.93	414	0.98
B	0.39	1.16	96.9	1.55	0	258	1.757
A	0	0	100	0	0	36	2
C	0	1.02	94.9	4.08	0	98	1.672
E	0	6.67	20.83	65.83	6.67	120	0.477
M	2.99	2.14	3.85	7.26	83.76	234	-0.615
Position: 77
Aln	A	G	C	U	gap	Seq	Con
T	10.86	7.51	14.88	38.34	28.42	746	-0.652
3	17.15	12.56	23.43	43	3.86	414	-0.085
B	1.16	9.69	24.03	65.12	0	258	0.702
A	0	0	77.78	22.22	0	36	1.236
C	0	1.02	2.04	96.94	0	98	1.774
E	57.5	25	8.33	1.67	7.5	120	0.213
M	4.27	1.28	5.13	5.56	83.76	234	-0.616
Position: 78
Aln	A	G	C	U	gap	Seq	Con
T	10.46	6.17	11.66	33.51	38.2	746	-0.773
3	12.32	10.14	18.84	37.2	21.5	414	-0.598
B	15.5	8.91	18.6	56.98	0	258	0.358
A	5.56	2.78	75	16.67	0	36	0.883
C	0	0	9.18	90.82	0	98	1.557
E	49.17	26.67	1.67	15	7.5	120	0.049
M	11.54	1.71	0	2.99	83.76	234	-0.501
Position: 79
Aln	A	G	C	U	gap	Seq	Con
T	9.65	10.46	37.8	14.88	27.21	746	-0.661
3	14.73	16.67	47.1	19.57	1.93	414	0.041
B	1.94	9.69	72.09	16.28	0	258	0.797
A	13.89	58.33	16.67	11.11	0	36	0.368
C	2.04	2.04	86.73	9.18	0	98	1.276
E	0	6.67	2.5	84.17	6.67	120	1.003
M	3.85	2.99	0.85	8.97	83.33	234	-0.589
Position: 80
Aln	A	G	C	U	gap	Seq	Con
T	4.42	55.36	0.67	12.33	27.21	746	-0.147
3	2.9	74.4	0.48	20.29	1.93	414	0.882
B	0	100	0	0	0	258	2
A	8.33	91.67	0	0	0	36	1.586
C	2.04	95.92	0	2.04	0	98	1.713
E	13.33	72.5	3.33	4.17	6.67	120	0.528
M	8.12	4.7	1.28	2.56	83.33	234	-0.603
Position: 81
Aln	A	G	C	U	gap	Seq	Con
T	5.76	59.79	1.21	5.36	27.88	746	-0.056
3	5.56	84.06	1.93	6.52	1.93	414	1.042
B	5.81	90.31	1.55	2.33	0	258	1.409
A	0	100	0	0	0	36	2
C	10.2	85.71	0	4.08	0	98	1.285
E	5.83	2.5	10	65.83	15.83	120	0.161
M	4.27	5.98	0.43	3.85	85.47	234	-0.555
Position: 82
Aln	A	G	C	U	gap	Seq	Con
T	2.54	40.03	8.43	16.73	32.26	747	-0.568
3	1.69	47.71	14.22	26.75	9.64	415	-0.036
B	0.39	65.12	17.44	16.67	0.39	258	0.657
A	0	80.56	8.33	11.11	0	36	1.098
C	2.04	93.88	2.04	2.04	0	98	1.571
E	0	0	0	1.65	98.35	121	-0.088
M	4.27	3.85	0.85	5.13	85.9	234	-0.56
Position: 83
Aln	A	G	C	U	gap	Seq	Con
T	4.83	47.25	0.54	4.16	43.22	745	-0.341
3	4.84	59.81	0.48	6.05	28.81	413	-0.031
B	7.39	87.16	0.78	4.67	0	257	1.288
A	0	63.89	0	36.11	0	36	1.056
C	7.14	92.86	0	0	0	98	1.629
E	0.83	0	0	0	99.17	120	-0.053
M	3.85	5.98	0.85	2.56	86.75	234	-0.531
Position: 84
Aln	A	G	C	U	gap	Seq	Con
T	53.15	0.13	0	0.94	45.77	745	0.008
3	70.46	0	0	0.48	29.06	413	0.508
B	99.22	0	0	0.39	0.39	257	1.919
A	100	0	0	0	0	36	2
C	96.94	0	0	1.02	2.04	98	1.734
E	0	0	0	0.83	99.17	120	-0.053
M	4.27	0.43	0	1.71	93.59	234	-0.29
Position: 85
Aln	A	G	C	U	gap	Seq	Con
T	4.15	50.87	0.54	1.74	42.7	747	-0.207
3	0.72	69.57	0.48	0.48	28.74	414	0.418
B	1.16	98.06	0	0.78	0	258	1.843
A	0	94.44	5.56	0	0	36	1.69
C	6.06	91.92	0	2.02	0	99	1.529
E	0	0.83	0	0	99.17	120	-0.053
M	9.4	0.43	0.85	3.85	85.47	234	-0.497
Position: 86
Aln	A	G	C	U	gap	Seq	Con
T	3.21	9.64	36.68	7.76	42.7	747	-0.68
3	2.9	14.25	47.34	6.76	28.74	414	-0.414
B	4.26	12.4	72.48	10.85	0	258	0.748
A	2.78	72.22	25	0	0	36	1.017
C	3.03	0	72.73	24.24	0	99	1.017
E	0	0.83	0	0	99.17	120	-0.053
M	3.85	5.56	2.56	2.56	85.47	234	-0.586
Position: 87
Aln	A	G	C	U	gap	Seq	Con
T	3.88	2.01	10.71	40.29	43.11	747	-0.554
3	3.14	1.93	18.6	47.34	28.99	414	-0.326
B	3.88	2.71	17.83	75.19	0.39	258	0.885
A	8.33	0	86.11	5.56	0	36	1.284
C	2.02	2.02	1.01	94.95	0	99	1.635
E	0	0.83	0	0	99.17	120	-0.053
M	5.98	2.14	0.85	4.7	86.32	234	-0.537
Position: 88
Aln	A	G	C	U	gap	Seq	Con
T	2.14	51.67	0.94	1.07	44.18	747	-0.148
3	1.93	69.32	0	0	28.74	414	0.432
B	1.94	98.06	0	0	0	258	1.862
A	5.56	94.44	0	0	0	36	1.69
C	3.03	92.93	3.03	0	1.01	99	1.509
E	0.83	0	0	0	99.17	120	-0.053
M	2.14	2.99	1.71	3.42	89.74	234	-0.472
Position: 89
Aln	A	G	C	U	gap	Seq	Con
T	7.63	25.44	10.84	12.18	43.91	747	-0.903
3	7	25.12	18.6	20.53	28.74	414	-0.782
B	11.24	40.31	15.5	32.95	0	258	0.173
A	0	0	100	0	0	36	2
C	14.14	82.83	1.01	2.02	0	99	1.195
E	0	0	0.83	0	99.17	120	-0.053
M	5.98	1.71	1.28	1.71	89.32	234	-0.456
Position: 90
Aln	A	G	C	U	gap	Seq	Con
T	25.17	4.02	12.58	14.59	43.64	747	-0.864
3	29.71	5.56	14.01	21.98	28.74	414	-0.721
B	33.33	8.91	22.48	35.27	0	258	0.146
A	100	0	0	0	0	36	2
C	58.59	2.02	33.33	6.06	0	99	0.661
E	0.83	0	0	0	99.17	120	-0.053
M	2.99	2.14	1.28	5.13	88.46	234	-0.496
Position: 91
Aln	A	G	C	U	gap	Seq	Con
T	46.38	3.35	3.35	3.75	43.16	746	-0.407
3	57.87	5.57	4.84	2.91	28.81	413	-0.142
B	89.11	5.45	3.89	1.56	0	257	1.347
A	25	25	27.78	22.22	0	36	0.004
C	91.92	2.02	2.02	4.04	0	99	1.474
E	0.83	0	0	0	99.17	120	-0.053
M	6.84	0	1.28	5.13	86.75	234	-0.478
Position: 92
Aln	A	G	C	U	gap	Seq	Con
T	25.7	17.4	3.48	10.04	43.37	747	-0.835
3	24.88	27.05	5.8	13.29	28.99	414	-0.732
B	39.53	29.84	8.91	21.32	0.39	258	0.125
A	2.78	94.44	2.78	0	0	36	1.635
C	79.8	13.13	0	6.06	1.01	99	1.023
E	0	0.83	0	0	99.17	120	-0.053
M	4.27	2.14	0.85	5.98	86.75	234	-0.528
Position: 93
Aln	A	G	C	U	gap	Seq	Con
T	6.56	9.1	26.91	13.79	43.64	747	-0.871
3	8.94	14.73	31.16	16.43	28.74	414	-0.763
B	13.95	18.6	41.09	26.36	0	258	0.118
A	2.78	33.33	63.89	0	0	36	0.915
C	2.02	3.03	70.71	23.23	1.01	99	0.803
E	0	0.83	0	0	99.17	120	-0.053
M	4.27	1.71	0.85	5.13	88.03	234	-0.496
Position: 94
Aln	A	G	C	U	gap	Seq	Con
T	45.13	8.68	0.27	1.07	44.86	749	-0.333
3	57.93	12.26	0.48	0.48	28.85	416	0.004
B	80.38	18.46	0.77	0	0.38	260	1.204
A	88.89	5.56	0	5.56	0	36	1.386
C	87.88	11.11	0	1.01	0	99	1.417
E	0	0.83	0	0	99.17	120	-0.053
M	4.27	1.28	0	2.14	92.31	234	-0.346
Position: 95
Aln	A	G	C	U	gap	Seq	Con
T	38.9	10.7	3.34	3.21	43.85	748	-0.596
3	46.75	18.07	3.86	2.65	28.67	415	-0.369
B	74.9	17.37	4.63	3.09	0	259	0.889
A	0	83.33	8.33	8.33	0	36	1.183
C	90.91	2.02	4.04	3.03	0	99	1.421
E	0	0	0.83	0	99.17	120	-0.053
M	2.99	1.28	2.14	4.27	89.32	234	-0.477
Position: 96
Aln	A	G	C	U	gap	Seq	Con
T	4.28	40.24	9.22	2.81	43.45	748	-0.576
3	4.34	50.12	13.98	2.89	28.67	415	-0.331
B	6.95	76.83	11.97	4.25	0	259	0.88
A	0	25	72.22	2.78	0	36	1.017
C	8.08	89.9	0	2.02	0	99	1.455
E	0	0	0.83	0	99.17	120	-0.053
M	2.56	1.71	4.7	2.99	88.03	234	-0.517
Position: 97
Aln	A	G	C	U	gap	Seq	Con
T	1.47	0.4	49.73	4.95	43.45	748	-0.229
3	0.72	0.48	68.43	1.69	28.67	415	0.347
B	0.77	0	96.53	2.7	0	259	1.756
A	0	5.56	94.44	0	0	36	1.69
C	1.01	0	87.88	11.11	0	99	1.417
E	0.83	0	0	0	99.17	120	-0.053
M	2.99	0.43	0.43	8.12	88.03	234	-0.435
Position: 98
Aln	A	G	C	U	gap	Seq	Con
T	11.62	13.08	0.8	30.44	44.06	749	-0.725
3	12.5	19.47	0.96	38.22	28.85	416	-0.524
B	18.85	23.08	1.15	56.54	0.38	260	0.48
A	8.33	58.33	0	33.33	0	36	0.719
C	28.28	6.06	1.01	62.63	2.02	99	0.596
E	0	0	0.83	0	99.17	120	-0.053
M	2.99	4.7	0.43	2.99	88.89	234	-0.473
Position: 99
Aln	A	G	C	U	gap	Seq	Con
T	12.3	2.94	1.34	38.5	44.92	748	-0.552
3	17.11	4.82	1.93	47.47	28.67	415	-0.357
B	24.32	7.72	3.09	64.86	0	259	0.659
A	19.44	0	0	80.56	0	36	1.289
C	17.17	1.01	2.02	77.78	2.02	99	0.947
E	0.83	0	0	0	99.17	120	-0.053
M	1.71	0.43	0	5.98	91.88	234	-0.327
Position: 100
Aln	A	G	C	U	gap	Seq	Con
T	7.62	3.21	2.67	41.44	45.05	748	-0.528
3	8.19	2.65	3.86	56.39	28.92	415	-0.178
B	8.49	2.32	3.47	85.33	0.39	259	1.17
A	30.56	13.89	19.44	36.11	0	36	0.092
C	19.19	2.02	4.04	72.73	2.02	99	0.754
E	0.83	0	0	0	99.17	120	-0.053
M	1.71	4.7	0	1.71	91.88	234	-0.358
Position: 101
Aln	A	G	C	U	gap	Seq	Con
T	5.21	41.52	0	2.4	50.87	749	-0.391
3	5.29	52.16	0	3.61	38.94	416	-0.196
B	8.46	83.46	0	5.38	2.69	260	1.06
A	0	0	0	0	100	36	--
C	2.02	94.95	0	1.01	2.02	99	1.594
E	0	0	0	0.83	99.17	120	-0.053
M	6.41	0	0	0.85	92.74	234	-0.268
Position: 102
Aln	A	G	C	U	gap	Seq	Con
T	0.53	7.14	0.26	2.51	89.55	756	-0.402
3	0.24	11.58	0.47	4.26	83.45	423	-0.498
B	0.37	4.87	0.75	6.37	87.64	267	-0.468
A	0	100	0	0	0	36	2
C	1.01	0	0	0	98.99	99	-0.061
E	0	0	0	0.83	99.17	120	-0.053
M	0.85	2.14	0	0.43	96.58	234	-0.191
Position: 103
Aln	A	G	C	U	gap	Seq	Con
T	52.87	0.53	0	0.4	46.19	749	0.003
3	70.67	0.72	0	0	28.61	416	0.506
B	99.23	0.77	0	0	0	260	1.935
A	100	0	0	0	0	36	2
C	96.97	0	0	3.03	0	99	1.804
E	0	0.83	0	0	99.17	120	-0.053
M	2.56	0.43	0	0	97.01	234	-0.152
Position: 104
Aln	A	G	C	U	gap	Seq	Con
T	8.68	2.27	8.81	36.98	43.26	749	-0.658
3	12.26	3.37	15.38	40.38	28.61	416	-0.568
B	10.77	5	23.08	61.15	0	260	0.516
A	63.89	0	11.11	25	0	36	0.735
C	3.03	1.01	2.02	93.94	0	99	1.582
E	0	0.83	0	0	99.17	120	-0.053
M	4.7	0.85	0	6.84	87.61	234	-0.45
Position: 105
Aln	A	G	C	U	gap	Seq	Con
T	2.14	1.2	49.73	4.55	42.38	748	-0.272
3	1.45	1.2	65.78	3.61	27.95	415	0.191
B	1.93	1.93	91.51	4.63	0	259	1.458
A	0	0	100	0	0	36	2
C	3.03	0	88.89	8.08	0	99	1.403
E	0.83	0	0	2.5	96.67	120	-0.171
M	2.99	1.71	4.7	4.7	85.9	234	-0.573
Position: 106
Aln	A	G	C	U	gap	Seq	Con
T	1.74	1.2	64.09	5.47	27.5	749	0.119
3	1.92	0.96	90.38	5.29	1.44	416	1.353
B	0	0	99.62	0.38	0	260	1.964
A	0	0	91.67	8.33	0	36	1.586
C	1.01	1.01	95.96	2.02	0	99	1.695
E	6.67	3.33	70	15	5	120	0.489
M	1.71	1.71	3.85	7.26	85.47	234	-0.559
Position: 107
Aln	A	G	C	U	gap	Seq	Con
T	20.56	41.39	7.34	3.2	27.5	749	-0.494
3	31.25	52.16	12.02	3.37	1.2	416	0.353
B	12.31	76.54	9.23	1.92	0	260	0.906
A	11.11	16.67	58.33	13.89	0	36	0.368
C	8.08	87.88	2.02	2.02	0	99	1.315
E	78.33	10	4.17	3.33	4.17	120	0.763
M	6.84	2.56	1.28	3.42	85.9	234	-0.554
Position: 108
Aln	A	G	C	U	gap	Seq	Con
T	18.16	29.64	5.07	20.16	26.97	749	-0.7
3	18.27	42.79	8.41	30.29	0.24	416	0.18
B	19.62	55.77	6.54	18.08	0	260	0.366
A	16.67	75	2.78	5.56	0	36	0.883
C	53.54	44.44	0	2.02	0	99	0.884
E	15.83	5	14.17	64.17	0.83	120	0.479
M	2.99	0	1.28	9.83	85.9	234	-0.467
Position: 109
Aln	A	G	C	U	gap	Seq	Con
T	37.68	14.51	17.18	3.6	27.03	751	-0.595
3	43.3	22.49	29.67	4.07	0.48	418	0.239
B	65.65	24.05	9.54	0.76	0	262	0.73
A	22.22	77.78	0	0	0	36	1.236
C	93.94	3.03	2.02	1.01	0	99	1.582
E	0.83	2.5	82.5	12.5	1.67	120	1.074
M	3.85	5.13	1.28	3.85	85.9	234	-0.568
Position: 110
Aln	A	G	C	U	gap	Seq	Con
T	5.98	61.75	2.92	1.73	27.62	753	0.012
3	6.43	85.24	4.05	2.62	1.67	420	1.092
B	0.76	97.72	1.14	0.38	0	263	1.81
A	0	100	0	0	0	36	2
C	4.04	95.96	0	0	0	99	1.756
E	20.66	53.72	11.57	8.26	5.79	121	0.038
M	5.98	5.13	2.14	0.85	85.9	234	-0.546
Position: 111
Aln	A	G	C	U	gap	Seq	Con
T	54.65	13.83	2.39	1.6	27.53	752	-0.158
3	72.08	21.72	4.3	1.67	0.24	419	0.862
B	74.52	25.48	0	0	0	263	1.181
A	91.67	8.33	0	0	0	36	1.586
C	93.94	6.06	0	0	0	99	1.67
E	60.83	17.5	15	5.83	0.83	120	0.4
M	6.84	2.99	0	2.14	88.03	234	-0.457
Position: 112
Aln	A	G	C	U	gap	Seq	Con
T	5.31	0.53	1.19	65.25	27.72	754	0.19
3	7.6	0.48	2.14	89.31	0.48	421	1.37
B	0.38	0	0	99.62	0	265	1.964
A	0	0	0	100	0	36	2
C	1.01	0	0	98.99	0	99	1.919
E	25.83	1.67	7.5	63.33	1.67	120	0.568
M	2.99	0.85	0	7.69	88.46	234	-0.421
Position: 113
Aln	A	G	C	U	gap	Seq	Con
T	8.1	10.23	20.72	33.33	27.62	753	-0.694
3	11.43	17.86	28.1	42.38	0.24	420	0.134
B	16.98	25.28	9.81	47.92	0	265	0.227
A	0	0	45.71	54.29	0	35	1.005
C	7.07	1.01	30.3	61.62	0	99	0.71
E	2.5	6.67	63.33	26.67	0.83	120	0.606
M	2.56	0.43	3.42	5.13	88.46	234	-0.481
Position: 114
Aln	A	G	C	U	gap	Seq	Con
T	2.52	2.52	18.3	49.87	26.79	754	-0.261
3	3.09	3.56	9.26	83.85	0.24	421	1.117
B	2.26	0	4.15	93.58	0	265	1.596
A	0	13.89	55.56	30.56	0	36	0.611
C	0	0	95.96	4.04	0	99	1.756
E	5.83	8.33	6.67	78.33	0.83	120	0.851
M	2.56	1.71	1.71	8.12	85.9	234	-0.537
Position: 115
Aln	A	G	C	U	gap	Seq	Con
T	0.27	0.53	59.23	13.15	26.83	753	0.059
3	0.24	0.24	77.14	22.14	0.24	420	1.163
B	0	0	99.62	0.38	0	264	1.964
A	0	0	100	0	0	36	2
C	0	0	100	0	0	99	2
E	0.83	0.83	20.83	76.67	0.83	120	1.045
M	0.43	1.28	9.83	2.56	85.9	234	-0.485
Position: 116
Aln	A	G	C	U	gap	Seq	Con
T	0.8	0.27	57.43	14.85	26.66	754	0.012
3	0.48	0	75.77	23.52	0.24	421	1.144
B	0	0	95.85	4.15	0	265	1.751
A	0	0	100	0	0	36	2
C	0	0	97.98	2.02	0	99	1.857
E	1.67	0	24.17	73.33	0.83	120	1.004
M	1.71	0.85	7.26	4.7	85.47	234	-0.544
Position: 117
Aln	A	G	C	U	gap	Seq	Con
T	2.39	68.17	0.4	2.25	26.79	754	0.295
3	0	98.34	0	1.43	0.24	421	1.863
B	0	100	0	0	0	265	2
A	0	88.89	0	11.11	0	36	1.497
C	5.05	94.95	0	0	0	99	1.711
E	0	97.5	0	1.67	0.83	120	1.792
M	5.56	2.56	1.28	4.7	85.9	234	-0.561
Position: 118
Aln	A	G	C	U	gap	Seq	Con
T	69.76	0.66	0.53	0.53	28.51	754	0.423
3	99.05	0.48	0.24	0	0.24	421	1.904
B	99.62	0.38	0	0	0	265	1.964
A	100	0	0	0	0	36	2
C	100	0	0	0	0	99	2
E	97.5	0.83	0.83	0	0.83	120	1.775
M	4.27	1.28	1.28	1.71	91.45	234	-0.403
Position: 119
Aln	A	G	C	U	gap	Seq	Con
T	70.82	0.4	0	1.06	27.72	754	0.479
3	99.29	0.48	0	0	0.24	421	1.928
B	99.62	0.38	0	0	0	265	1.964
A	100	0	0	0	0	36	2
C	97.98	0	0	1.01	1.01	99	1.817
E	98.33	0.83	0	0	0.83	120	1.844
M	8.12	0.43	0	2.99	88.46	234	-0.405
Position: 120
Aln	A	G	C	U	gap	Seq	Con
T	2.39	0.4	13.13	56.5	27.59	754	-0.075
3	0.24	0	23.04	76.25	0.48	421	1.147
B	0	0	0	99.62	0.38	265	1.957
A	0	0	0	100	0	36	2
C	1.01	0	0	98.99	0	99	1.919
E	0.83	0	80.83	17.5	0.83	120	1.18
M	6.84	1.28	0.85	2.99	88.03	234	-0.478
Position: 121
Aln	A	G	C	U	gap	Seq	Con
T	12.75	56.97	1.46	0.66	28.15	753	-0.056
3	2.62	94.29	0	0.95	2.14	420	1.557
B	1.14	98.48	0	0	0.38	264	1.867
A	8.33	91.67	0	0	0	36	1.586
C	75.76	24.24	0	0	0	99	1.201
E	4.17	85.83	0	3.33	6.67	120	1.062
M	4.27	3.85	4.7	0.43	86.75	234	-0.529
Position: 122
Aln	A	G	C	U	gap	Seq	Con
T	4.11	53.05	12.2	1.86	28.78	754	-0.244
3	2.14	69.6	21.85	2.85	3.56	421	0.649
B	1.89	97.74	0	0	0.38	265	1.822
A	8.33	91.67	0	0	0	36	1.586
C	13.13	86.87	0	0	0	99	1.439
E	0.83	0.83	76.67	10	11.67	120	0.664
M	3.85	8.97	0	0.85	86.32	234	-0.461
Position: 123
Aln	A	G	C	U	gap	Seq	Con
T	2.39	53.85	0.27	0.66	42.84	754	-0.061
3	1.66	69.83	0.24	0.48	27.79	421	0.413
B	2.27	97.35	0	0	0.38	264	1.8
A	0	100	0	0	0	36	2
C	2.02	97.98	0	0	0	99	1.857
E	0.83	0.83	0.83	1.65	95.87	121	-0.245
M	3.85	6.41	0.43	1.28	88.03	234	-0.472
Position: 124
Aln	A	G	C	U	gap	Seq	Con
T	13.53	47.48	5.04	4.38	29.58	754	-0.427
3	20.67	61.76	9.03	4.75	3.8	421	0.323
B	3.02	96.6	0	0	0.38	265	1.761
A	91.67	2.78	0	0	5.56	36	1.399
C	6.06	84.85	0	9.09	0	99	1.239
E	38.33	2.5	31.67	16.67	10.83	120	-0.184
M	3.85	5.98	0	1.71	88.46	234	-0.45
Position: 125
Aln	A	G	C	U	gap	Seq	Con
T	34.26	7.67	23.94	4.89	29.23	756	-0.624
3	52.25	13	24.35	6.38	4.02	423	0.112
B	61.13	14.34	21.13	3.02	0.38	265	0.5
A	25	0	52.78	16.67	5.56	36	0.24
C	13.13	1.01	78.79	7.07	0	99	1.007
E	40.98	13.93	22.95	10.66	11.48	122	-0.343
M	10.68	0.85	0	1.28	87.18	234	-0.4
Position: 126
Aln	A	G	C	U	gap	Seq	Con
T	53.57	0.4	3.04	13.76	29.23	756	-0.164
3	66.67	0.71	5.44	23.4	3.78	423	0.586
B	99.62	0	0	0	0.38	265	1.957
A	25	0	11.11	58.33	5.56	36	0.351
C	97.98	0	0	1.01	1.01	99	1.817
E	7.38	2.46	15.57	63.93	10.66	122	0.203
M	11.11	0	0	1.71	87.18	234	-0.369
Position: 127
Aln	A	G	C	U	gap	Seq	Con
T	51.59	3.04	1.32	12.17	31.88	756	-0.262
3	62.88	5.2	2.36	21.04	8.51	423	0.284
B	99.62	0	0	0	0.38	264	1.956
A	0	0	19.44	75	5.56	36	0.887
C	98.99	0	0	1.01	0	99	1.919
E	2.44	17.89	2.44	50.41	26.83	123	-0.249
M	11.11	0.43	0	0.85	87.61	234	-0.364
Position: 128
Aln	A	G	C	U	gap	Seq	Con
T	0.53	0.53	53.7	1.85	43.39	756	-0.059
3	0.47	0.47	69.27	1.65	28.13	423	0.385
B	0.38	0	96.6	2.64	0.38	265	1.745
A	0	0	100	0	0	36	2
C	0	0	97.98	2.02	0	99	1.857
E	0.82	1.64	0.82	0	96.72	122	-0.192
M	0.85	0.85	6.84	2.14	89.32	234	-0.433
Position: 129
Aln	A	G	C	U	gap	Seq	Con
T	1.32	12.95	52.97	3.96	28.8	757	-0.228
3	2.12	22.88	69.34	2.36	3.3	424	0.673
B	0	0	97.37	2.26	0.38	266	1.801
A	0	0	91.67	8.33	0	36	1.586
C	0	0	86.87	13.13	0	99	1.439
E	7.38	79.51	1.64	0.82	10.66	122	0.748
M	0.43	0.43	8.97	2.99	87.18	234	-0.447
Position: 130
Aln	A	G	C	U	gap	Seq	Con
T	0.92	1.06	51.98	16.75	29.29	758	-0.159
3	0.24	0.24	86.82	8.71	4	425	1.21
B	0	0	95.11	3.76	1.13	266	1.658
A	2.78	0	38.89	58.33	0	36	0.873
C	2.02	0	16.16	81.82	0	99	1.224
E	0	0.81	82.93	4.88	11.38	123	0.923
M	1.71	2.99	3.85	3.85	87.61	234	-0.533
Position: 131
Aln	A	G	C	U	gap	Seq	Con
T	25.82	25.16	0.79	0.53	47.69	759	-0.564
3	44.94	44.24	1.41	0.47	8.94	425	0.347
B	63.3	33.33	1.12	0.75	1.5	267	0.808
A	8.33	63.89	0	0	27.78	36	0.219
C	0	1	0	1	98	100	-0.121
E	15.57	62.3	2.46	0	19.67	122	0.17
M	2.14	0.85	0	0.43	96.58	234	-0.191
Position: 132
Aln	A	G	C	U	gap	Seq	Con
T	6.85	19.89	23.98	1.71	47.56	759	-0.784
3	11.53	35.29	42.59	1.88	8.71	425	-0.003
B	17.23	46.82	33.71	0.75	1.5	267	0.348
A	2.78	8.33	58.33	5.56	25	36	-0.128
C	1	0	0	1	98	100	-0.121
E	1.64	18.03	57.38	3.28	19.67	122	-0.019
M	0.85	0.43	0.43	1.71	96.58	234	-0.206
Position: 133
Aln	A	G	C	U	gap	Seq	Con
T	5.27	1.32	26.75	19.89	46.77	759	-0.727
3	9.18	2.12	47.06	34.59	7.06	425	0.113
B	3	1.87	50.94	42.7	1.5	267	0.6
A	0	5.56	52.78	13.89	27.78	36	-0.183
C	0	0	0	1	99	100	-0.061
E	25.41	1.64	36.89	22.95	13.11	122	-0.264
M	0.43	0.43	1.28	1.28	96.58	234	-0.209
Position: 134
Aln	A	G	C	U	gap	Seq	Con
T	18.68	7.63	15.92	10.53	47.24	760	-0.955
3	33.1	13.38	27.93	17.61	7.98	426	-0.322
B	50.75	14.55	13.06	19.03	2.61	268	0.07
A	2.78	36.11	30.56	0	30.56	36	-0.331
C	0	0	0	1	99	100	-0.061
E	3.28	4.1	59.84	19.67	13.11	122	0.098
M	0.43	0.43	0.85	1.71	96.58	234	-0.206
Position: 135
Aln	A	G	C	U	gap	Seq	Con
T	4.87	16.6	18.84	11.2	48.48	759	-0.926
3	7.76	29.41	33.41	19.53	9.88	425	-0.322
B	10.07	36.94	25.37	23.51	4.1	268	-0.129
A	2.86	20	40	2.86	34.29	35	-0.501
C	1	0	0	0	99	100	-0.061
E	4.1	15.57	49.18	15.57	15.57	122	-0.257
M	1.28	0.43	0.43	0.85	97.01	234	-0.189
Position: 136
Aln	A	G	C	U	gap	Seq	Con
T	14.61	14.08	6.18	9.08	56.05	760	-0.955
3	26.06	24.18	10.8	16.2	22.77	426	-0.714
B	32.84	28.73	8.21	12.69	17.54	268	-0.51
A	2.78	19.44	5.56	2.78	69.44	36	-0.732
C	0	1	0	0	99	100	-0.061
E	18.03	15.57	18.03	27.87	20.49	122	-0.701
M	0	1.28	0.43	0	98.29	234	-0.104
Position: 137
Aln	A	G	C	U	gap	Seq	Con
T	6.71	10.66	9.47	14.74	58.42	760	-0.956
3	11.97	19.01	16.9	25.35	26.76	426	-0.802
B	14.18	12.69	22.39	27.99	22.76	268	-0.716
A	0	19.44	8.33	0	72.22	36	-0.542
C	0	0	0	1	99	100	-0.061
E	10.66	32.79	7.38	27.05	22.13	122	-0.584
M	0	0	0	1.28	98.72	234	-0.073
Position: 138
Aln	A	G	C	U	gap	Seq	Con
T	22.34	10.25	6.18	17.21	44.02	761	-0.906
3	36.3	18.03	10.3	25.06	10.3	427	-0.358
B	49.44	23.05	8.18	14.13	5.2	269	-0.011
A	25	33.33	0	36.11	5.56	36	0.098
C	13	0	1	17	69	100	-0.633
E	10.66	2.46	18.03	45.9	22.95	122	-0.383
M	0.85	0.43	0.85	2.99	94.87	234	-0.272
Position: 139
Aln	A	G	C	U	gap	Seq	Con
T	33.95	4.08	6.84	22.5	32.63	760	-0.646
3	48.01	6.79	10.54	30.68	3.98	427	0.098
B	60.22	8.55	7.81	22.68	0.74	269	0.416
A	25	0	16.67	58.33	0	36	0.616
C	52.53	1.01	6.06	35.35	5.05	99	0.351
E	27.87	4.92	14.75	40.16	12.3	122	-0.281
M	0.43	0.43	0.43	2.14	96.58	234	-0.2
Position: 140
Aln	A	G	C	U	gap	Seq	Con
T	17.61	13.01	8.8	28.12	32.46	761	-0.823
3	23.36	9.81	15.19	47.43	4.21	428	-0.018
B	25.19	13.7	10	50.37	0.74	270	0.208
A	44.44	2.78	16.67	36.11	0	36	0.375
C	29.29	57.58	2.02	8.08	3.03	99	0.402
E	13.11	3.28	26.23	44.26	13.11	122	-0.22
M	2.14	0	0	1.28	96.58	234	-0.179
Position: 141
Aln	A	G	C	U	gap	Seq	Con
T	24.05	15.11	10.38	15.37	35.09	761	-0.893
3	28.04	25.47	17.52	20.79	8.18	428	-0.387
B	39.26	32.22	12.59	11.48	4.44	270	-0.08
A	13.89	25	13.89	38.89	8.33	36	-0.286
C	60.61	4.04	4.04	27.27	4.04	99	0.409
E	7.38	10.66	29.51	36.07	16.39	122	-0.427
M	1.28	0.85	0	0.43	97.44	234	-0.158
Position: 142
Aln	A	G	C	U	gap	Seq	Con
T	9.19	16.4	8.27	6.3	59.84	762	-0.933
3	16.36	29.21	14.49	10.75	29.21	428	-0.798
B	19.63	37.04	5.93	14.44	22.96	270	-0.583
A	0	8.33	19.44	0	72.22	36	-0.542
C	0	0	0	1	99	100	-0.061
E	13.93	18.03	31.97	5.74	30.33	122	-0.733
M	0	0	0.43	0.43	99.15	234	-0.062
Position: 143
Aln	A	G	C	U	gap	Seq	Con
T	8.27	9.45	13.12	12.2	56.96	762	-0.975
3	14.72	16.82	23.13	21.26	24.07	428	-0.779
B	12.96	11.48	27.78	30	17.78	270	-0.574
A	0	8.33	16.67	5.56	69.44	36	-0.715
C	0	0	0	1	99	100	-0.061
E	22.95	31.15	14.75	6.56	24.59	122	-0.666
M	0	0	0.43	0.43	99.15	234	-0.062
Position: 144
Aln	A	G	C	U	gap	Seq	Con
T	11.55	18.5	15.35	5.38	49.21	762	-0.94
3	19.86	32.71	27.1	9.58	10.75	428	-0.386
B	22.96	27.78	35.56	10.74	2.96	270	-0.087
A	2.78	38.89	19.44	2.78	36.11	36	-0.529
C	1	0	0	0	99	100	-0.061
E	18.03	41.8	10.66	9.02	20.49	122	-0.507
M	0.85	0.43	0.43	0	98.29	234	-0.116
Position: 145
Aln	A	G	C	U	gap	Seq	Con
T	8.14	15.22	8.66	20.08	47.9	762	-0.945
3	14.02	26.4	15.19	35.75	8.64	428	-0.326
B	18.52	12.96	16.3	50.37	1.85	270	0.099
A	0	25	36.11	8.33	30.56	36	-0.463
C	1	0	0	0	99	100	-0.061
E	8.2	56.56	6.56	11.48	17.21	122	-0.158
M	0.43	1.28	0.43	0	97.86	234	-0.136
Position: 146
Aln	A	G	C	U	gap	Seq	Con
T	19.69	29.4	0.79	3.02	47.11	762	-0.642
3	34.35	52.1	0.93	5.37	7.24	428	0.272
B	42.59	52.96	0.37	2.59	1.48	270	0.704
A	13.89	52.78	5.56	0	27.78	36	-0.183
C	0	0	0	0	100	100	--
E	22.13	50	0.82	13.11	13.93	122	-0.098
M	1.28	0.43	0.85	0	97.44	234	-0.158
Position: 147
Aln	A	G	C	U	gap	Seq	Con
T	1.18	25.89	11.56	15.11	46.25	761	-0.792
3	1.64	45.9	20.37	25.76	6.32	427	0.037
B	1.11	34.44	25.19	37.78	1.48	270	0.247
A	5.56	58.33	2.78	8.33	25	36	-0.128
C	0	0	0	3	97	100	-0.134
E	1.65	67.77	14.88	4.13	11.57	121	0.331
M	0.85	0.43	0.43	0.85	97.44	234	-0.17
Position: 148
Aln	A	G	C	U	gap	Seq	Con
T	0.66	1.05	23.52	28.52	46.25	761	-0.564
3	0.47	1.64	41.69	49.88	6.32	427	0.461
B	0.74	1.11	32.59	63.7	1.85	270	0.79
A	0	0	65.71	8.57	25.71	35	0.28
C	2	0	0	2	96	100	-0.202
E	0	3.28	54.92	31.15	10.66	122	0.282
M	0.43	0.43	0.43	0.85	97.86	234	-0.147
Position: 149
Aln	A	G	C	U	gap	Seq	Con
T	61.89	4.73	0.53	1.05	31.8	761	0.093
3	86.45	7.71	0.93	0.93	3.97	428	1.143
B	94.44	4.07	0.37	0.74	0.37	270	1.614
A	41.67	52.78	0	0	5.56	36	0.644
C	92.93	1.01	0	4.04	2.02	99	1.494
E	81.97	2.46	2.46	1.64	11.48	122	0.817
M	3.85	0.85	0	0	95.3	234	-0.212
Position: 150
Aln	A	G	C	U	gap	Seq	Con
T	2.37	0.66	30.49	35.61	30.88	761	-0.369
3	2.34	0.23	32.71	61.45	3.27	428	0.667
B	0.74	0.37	21.85	76.67	0.37	270	1.107
A	22.22	0	72.22	5.56	0	36	0.947
C	5.05	2.02	91.92	1.01	0	99	1.49
E	0	0	45.08	44.26	10.66	122	0.404
M	1.28	0.85	0.43	2.99	94.44	234	-0.291
Position: 151
Aln	A	G	C	U	gap	Seq	Con
T	3.42	12.35	25.49	27.99	30.75	761	-0.694
3	3.5	21.5	43.93	27.8	3.27	428	0.092
B	1.11	4.44	64.44	29.63	0.37	270	0.762
A	8.33	0	16.67	75	0	36	0.959
C	4.04	1.01	1.01	93.94	0	99	1.594
E	7.38	65.57	6.56	9.84	10.66	122	0.179
M	2.99	0.43	2.14	0.43	94.02	234	-0.301
Position: 152
Aln	A	G	C	U	gap	Seq	Con
T	15.24	9.86	28.91	14.72	31.27	761	-0.818
3	17.76	13.55	46.5	18.22	3.97	428	-0.059
B	27.78	19.63	37.78	13.7	1.11	270	0.008
A	0	0	80.56	19.44	0	36	1.289
C	35.35	15.15	15.15	34.34	0	99	0.115
E	0.82	4.1	55.74	27.87	11.48	122	0.183
M	2.14	0.85	2.56	0	94.44	234	-0.28
Position: 153
Aln	A	G	C	U	gap	Seq	Con
T	11.43	5.26	30.49	18.53	34.3	761	-0.77
3	17.52	8.88	37.15	29.67	6.78	428	-0.2
B	25.56	9.63	16.67	42.22	5.93	270	-0.144
A	0	22.22	77.78	0	0	36	1.236
C	4.04	1.01	73.74	12.12	9.09	99	0.557
E	4.92	3.28	70.49	10.66	10.66	122	0.367
M	3.42	0.43	0	0.85	95.3	234	-0.231
Position: 154
Aln	A	G	C	U	gap	Seq	Con
T	13.01	3.42	19.32	29.83	34.43	761	-0.746
3	20.56	6.07	19.39	45.33	8.64	428	-0.169
B	29.26	5.56	15.93	41.48	7.78	270	-0.141
A	0	19.44	72.22	0	8.33	36	0.736
C	4.04	0	62.63	33.33	0	99	0.862
E	7.38	3.28	11.48	67.21	10.66	122	0.26
M	2.99	0	0.85	0	96.15	234	-0.188
Position: 155
Aln	A	G	C	U	gap	Seq	Con
T	17.21	17.21	8.15	20.76	36.66	761	-0.903
3	27.1	28.74	12.15	19.39	12.62	428	-0.485
B	39.63	11.48	14.44	26.67	7.78	270	-0.242
A	0	25	11.11	5.56	58.33	36	-0.704
C	12.12	3.03	10.1	74.75	0	99	0.83
E	7.38	68.03	7.38	7.38	9.84	122	0.264
M	1.28	2.14	0	0.43	96.15	234	-0.21
Position: 156
Aln	A	G	C	U	gap	Seq	Con
T	19.69	14.83	8.4	19.55	37.53	762	-0.912
3	20.98	20.75	12.59	31.7	13.99	429	-0.522
B	27.78	26.67	13.33	24.07	8.15	270	-0.362
A	11.11	11.11	0	8.33	69.44	36	-0.757
C	59.6	23.23	5.05	11.11	1.01	99	0.409
E	8.94	10.57	14.63	55.28	10.57	123	-0.087
M	0.43	0.43	2.14	0.85	96.15	234	-0.222
Position: 157
Aln	A	G	C	U	gap	Seq	Con
T	3.02	7.23	30.88	19.71	39.16	761	-0.725
3	4.21	11.21	47.2	21.03	16.36	428	-0.285
B	2.96	15.93	62.22	11.11	7.78	270	0.207
A	5.56	2.78	2.78	8.33	80.56	36	-0.68
C	5.05	4.04	33.33	56.57	1.01	99	0.515
E	6.56	3.28	27.05	46.72	16.39	122	-0.198
M	0	1.28	0	1.71	97.01	234	-0.164
Position: 158
Aln	A	G	C	U	gap	Seq	Con
T	4.47	1.58	2.76	50.85	40.34	761	-0.269
3	1.4	2.34	2.57	77.57	16.12	428	0.62
B	0	0.37	2.59	87.41	9.63	270	1.146
A	5.56	0	2.78	11.11	80.56	36	-0.59
C	27.27	1.01	6.06	55.56	10.1	99	0.169
E	3.28	7.38	2.46	75.41	11.48	122	0.534
M	0.43	0.43	1.71	0	97.44	234	-0.153
Position: 159
Aln	A	G	C	U	gap	Seq	Con
T	1.45	48.49	6.44	3.42	40.21	761	-0.349
3	0.7	70.56	9.35	2.1	17.29	428	0.375
B	0	87.41	1.11	1.11	10.37	270	1.14
A	0	0	8.33	2.78	88.89	36	-0.371
C	6.06	67.68	5.05	16.16	5.05	99	0.413
E	2.46	54.1	27.87	4.1	11.48	122	0.099
M	0.85	0	1.71	0.43	97.01	234	-0.175
Position: 160
Aln	A	G	C	U	gap	Seq	Con
T	53.61	3.15	1.05	1.71	40.47	761	-0.146
3	73.36	4.21	1.4	2.8	18.22	428	0.437
B	86.67	1.11	0	0	12.22	270	1.134
A	0	0	8.33	0	91.67	36	-0.247
C	92.93	2.02	0	1.01	4.04	99	1.453
E	65.57	12.3	2.46	9.84	9.84	122	0.243
M	0.85	1.71	0.85	0	96.58	234	-0.198
Position: 161
Aln	A	G	C	U	gap	Seq	Con
T	46.06	5.77	4.07	8.27	35.83	762	-0.485
3	59.91	9.32	6.29	13.52	10.96	429	0.028
B	90	2.96	0.37	2.59	4.07	270	1.277
A	2.78	44.44	13.89	38.89	0	36	0.411
C	92.93	1.01	0	3.03	3.03	99	1.468
E	10.57	13.01	17.07	30.08	29.27	123	-0.786
M	0.85	1.28	1.71	0.85	95.3	234	-0.271
Position: 162
Aln	A	G	C	U	gap	Seq	Con
T	5	1.97	4.87	54.47	33.68	760	-0.22
3	7.73	3.04	7.96	72.83	8.43	427	0.468
B	2.22	0.37	7.41	90	0	270	1.433
A	17.65	2.94	17.65	61.76	0	34	0.538
C	3.03	0	2.02	94.95	0	99	1.662
E	17.07	8.94	6.5	38.21	29.27	123	-0.638
M	0.85	0.85	0.43	3.85	94.02	234	-0.296
Position: 163
Aln	A	G	C	U	gap	Seq	Con
T	31.32	1.97	7.63	22.11	36.97	760	-0.671
3	51.29	3.28	11.01	19.91	14.52	427	-0.164
B	67.41	2.59	11.11	18.89	0	270	0.673
A	35.29	2.94	17.65	44.12	0	34	0.358
C	9.09	1.01	10.1	79.8	0	99	1.025
E	20.33	4.88	8.94	15.45	50.41	123	-0.914
M	4.27	0	0.43	1.71	93.59	234	-0.29
Position: 164
Aln	A	G	C	U	gap	Seq	Con
T	6.47	2.72	43.86	12.03	34.93	773	-0.515
3	10.23	2.73	57.27	18.64	11.14	440	0.034
B	9.67	0	80.67	8.92	0.74	269	1.046
A	16.67	19.44	2.78	2.78	58.33	36	-0.798
C	4.04	3.03	85.86	6.06	1.01	99	1.139
E	9.63	3.7	25.19	42.22	19.26	135	-0.37
M	0.43	2.56	0.85	2.14	94.02	234	-0.31
Position: 165
Aln	A	G	C	U	gap	Seq	Con
T	46.94	4.85	3.95	7.91	36.35	784	-0.455
3	60	8	6.89	11.56	13.56	450	-0.021
B	89.26	0.37	0	0.74	9.63	270	1.254
A	19.44	0	27.78	13.89	38.89	36	-0.676
C	94	1	0	2	3	100	1.525
E	15.28	24.31	14.58	31.25	14.58	144	-0.536
M	1.71	0.43	0	3.42	94.44	234	-0.267
Position: 166
Aln	A	G	C	U	gap	Seq	Con
T	1.6	0.99	5.67	53.94	37.81	812	-0.163
3	2.72	1.46	8.37	71.97	15.48	478	0.402
B	0	0.74	0	87.04	12.22	270	1.158
A	0	5.56	0	0	94.44	36	-0.198
C	0	0	1	93	6	100	1.473
E	7.56	1.74	23.26	63.37	4.07	172	0.441
M	0	0.43	2.14	0.43	97.01	234	-0.169
Position: 167
Aln	A	G	C	U	gap	Seq	Con
T	40.15	8.13	12.07	1.72	37.93	812	-0.581
3	50.42	10.67	20.5	2.72	15.69	478	-0.186
B	88.52	0	0.37	0	11.11	270	1.24
A	0	8.33	0	0	91.67	36	-0.247
C	84	10	0	0	6	100	1.093
E	1.16	27.91	56.4	7.56	6.98	172	0.256
M	0.43	2.14	0	0.43	97.01	234	-0.169
Position: 168
Aln	A	G	C	U	gap	Seq	Con
T	20.81	37.81	2.34	2.09	36.95	812	-0.515
3	29.08	52.51	1.88	1.88	14.64	478	0.079
B	1.11	89.63	0	0	9.26	270	1.283
A	2.78	8.33	0	0	88.89	36	-0.371
C	29	56	5	7	3	100	0.317
E	78.49	3.49	5.23	5.23	7.56	172	0.679
M	0.43	0	2.14	0.43	97.01	234	-0.169
Position: 169
Aln	A	G	C	U	gap	Seq	Con
T	14.41	37.44	6.28	5.54	36.33	812	-0.673
3	17.36	54.81	10.04	4.39	13.39	478	-0.101
B	3.7	69.26	15.93	3.33	7.78	270	0.429
A	16.67	2.78	0	0	80.56	36	-0.437
C	34	41	3	19	3	100	0.125
E	38.95	43.02	2.91	6.98	8.14	172	0.073
M	0	0.43	0	2.14	97.44	234	-0.137
Position: 170
Aln	A	G	C	U	gap	Seq	Con
T	17.86	13.79	13.05	19.83	35.47	812	-0.924
3	27.62	21.97	16.32	21.34	12.76	478	-0.53
B	16.67	21.48	22.59	31.48	7.78	270	-0.359
A	8.33	8.33	2.78	2.78	77.78	36	-0.722
C	11	7	23	57	2	100	0.278
E	48.84	25.58	9.3	9.3	6.98	172	-0.053
M	0.85	0	2.14	0.85	96.15	234	-0.213
Position: 171
Aln	A	G	C	U	gap	Seq	Con
T	18.23	9.36	19.46	18.23	34.73	812	-0.899
3	15.06	13.81	32.64	26.78	11.72	478	-0.439
B	22.96	17.78	10.74	40.74	7.78	270	-0.246
A	8.33	13.89	11.11	8.33	58.33	36	-0.966
C	76	10	0	13	1	100	0.898
E	4.07	7.56	71.51	8.72	8.14	172	0.42
M	0	0	0.85	2.99	96.15	234	-0.188
Position: 172
Aln	A	G	C	U	gap	Seq	Con
T	30.54	19.33	3.08	14.53	32.51	812	-0.717
3	46.03	19.25	5.02	21.55	8.16	478	-0.125
B	35.19	19.63	4.07	32.96	8.15	270	-0.165
A	0	75	16.67	0	8.33	36	0.792
C	28	64	0	8	0	100	0.782
E	72.67	6.98	4.07	8.14	8.14	172	0.457
M	0	0.43	0.43	2.99	96.15	234	-0.196
Position: 173
Aln	A	G	C	U	gap	Seq	Con
T	17.86	33.74	3.82	13.3	31.28	812	-0.69
3	26.78	40.79	5.65	20.29	6.49	478	-0.123
B	40.37	16.67	4.44	32.22	6.3	270	-0.062
A	0	75	25	0	0	36	1.189
C	15	79	3	3	0	100	1.017
E	11.05	71.51	3.49	5.81	8.14	172	0.438
M	0.85	0	0.43	3.42	95.3	234	-0.231
Position: 174
Aln	A	G	C	U	gap	Seq	Con
T	13.67	33.5	6.53	17.12	29.19	812	-0.716
3	13.18	53.14	7.74	22.8	3.14	478	0.138
B	11.48	37.78	12.59	37.04	1.11	270	0.109
A	19.44	80.56	0	0	0	36	1.289
C	48	12	15	24	1	100	0.134
E	14.53	71.51	1.74	5.23	6.98	172	0.518
M	0	2.56	0.43	2.56	94.44	234	-0.271
Position: 175
Aln	A	G	C	U	gap	Seq	Con
T	25.99	24.88	12.68	7.88	28.57	812	-0.759
3	23.85	41	21.55	11.09	2.51	478	-0.033
B	28.15	66.3	4.44	1.11	0	270	0.82
A	75	16.67	0	8.33	0	36	0.959
C	95	1	0	4	0	100	1.678
E	6.4	6.4	52.91	27.33	6.98	172	0.088
M	0.85	2.14	0	2.99	94.02	234	-0.293
Position: 176
Aln	A	G	C	U	gap	Seq	Con
T	35.71	32.14	0.49	2.96	28.69	812	-0.335
3	58.58	35.15	0.21	3.35	2.72	478	0.639
B	76.3	22.96	0	0.37	0.37	270	1.148
A	5.56	72.22	0	22.22	0	36	0.947
C	2	91	2	5	0	100	1.434
E	41.86	46.51	0.58	4.07	6.98	172	0.322
M	3.42	0.85	0.43	1.28	94.02	234	-0.303
Position: 177
Aln	A	G	C	U	gap	Seq	Con
T	36.82	25	4.31	3.69	30.17	812	-0.527
3	42.26	41.42	5.86	6.07	4.39	478	0.177
B	57.41	35.56	2.96	1.11	2.96	270	0.578
A	5.56	38.89	38.89	16.67	0	36	0.278
C	94	4	0	0	2	100	1.577
E	26.16	51.16	3.49	11.63	7.56	172	0.037
M	1.28	0.43	2.99	0.43	94.87	234	-0.269
Position: 178
Aln	A	G	C	U	gap	Seq	Con
T	2.1	68.77	0.12	1.23	27.78	810	0.352
3	2.1	97.27	0	0.42	0.21	476	1.788
B	0.37	99.63	0	0	0	269	1.965
A	8.33	86.11	0	5.56	0	36	1.284
C	3	94	0	1	2	100	1.545
E	3.51	95.91	0	0	0.58	171	1.718
M	1.71	0	0.43	2.99	94.87	234	-0.255
Position: 179
Aln	A	G	C	U	gap	Seq	Con
T	22.53	25.42	22.65	2.05	27.35	830	-0.645
3	25.83	36.04	36.04	1.25	0.83	480	0.281
B	2.57	35.66	60.66	0	1.1	272	0.802
A	0	94.44	5.56	0	0	36	1.69
C	50	37	10	0	3	100	0.425
E	68.02	24.42	3.49	3.49	0.58	172	0.733
M	5.2	0.4	2	4.4	88	250	-0.487
Position: 180
Aln	A	G	C	U	gap	Seq	Con
T	24.4	21.01	18.48	10.14	25.97	828	-0.779
3	34.94	33.68	16.95	14.02	0.42	478	0.068
B	56.67	39.63	1.48	1.48	0.74	270	0.759
A	0	97.22	0	2.78	0	36	1.817
C	11	12	69	6	2	100	0.517
E	8.14	11.05	44.77	36.05	0	172	0.305
M	9.6	0.4	1.2	4.4	84.4	250	-0.526
Position: 181
Aln	A	G	C	U	gap	Seq	Con
T	39.14	9.48	9.24	16.33	25.81	833	-0.617
3	41.61	15.73	15.11	26.71	0.83	483	0.059
B	54.81	18.52	17.78	7.41	1.48	270	0.233
A	100	0	0	0	0	36	2
C	96	0	2	2	0	100	1.718
E	9.6	14.69	14.12	61.58	0	177	0.439
M	11.6	1.2	0.8	2	84.4	250	-0.5
Position: 182
Aln	A	G	C	U	gap	Seq	Con
T	73.86	0.36	0.12	0.36	25.3	834	0.599
3	99.17	0.41	0.21	0.21	0	484	1.919
B	99.63	0.37	0	0	0	270	1.965
A	100	0	0	0	0	36	2
C	100	0	0	0	0	100	2
E	98.31	0.56	0.56	0.56	0	178	1.85
M	14.4	0.4	0	0.8	84.4	250	-0.385
Position: 183
Aln	A	G	C	U	gap	Seq	Con
T	0.48	0.24	71.77	2.15	25.36	836	0.47
3	0.21	0.41	97.33	1.85	0.21	486	1.782
B	0	0.74	99.26	0	0	270	1.937
A	0	0	100	0	0	36	2
C	0	0	100	0	0	100	2
E	0.56	0	93.89	5	0.56	180	1.604
M	1.2	0	10.8	3.6	84.4	250	-0.491
Position: 184
Aln	A	G	C	U	gap	Seq	Con
T	0.96	12.57	55.45	6.35	24.67	835	-0.156
3	0	20	77.73	2.27	0	485	1.129
B	0	26.67	71.48	1.85	0	270	1.039
A	0	36.11	55.56	8.33	0	36	0.699
C	0	0	82	18	0	100	1.32
E	0	6.7	91.62	1.68	0	179	1.524
M	3.2	3.2	1.6	9.6	82.4	250	-0.616
Position: 185
Aln	A	G	C	U	gap	Seq	Con
T	4.19	6.95	48.38	15.81	24.67	835	-0.378
3	4.12	11.34	69.48	15.05	0	485	0.678
B	7.41	16.67	50	25.93	0	270	0.286
A	0	8.33	88.89	2.78	0	36	1.407
C	0	2	59	39	0	100	0.908
E	0	3.91	94.97	1.12	0	179	1.674
M	6	0.4	3.2	8	82.4	250	-0.604
Position: 186
Aln	A	G	C	U	gap	Seq	Con
T	16.29	49.82	4.19	5.03	24.67	835	-0.328
3	12.58	74.85	6.8	5.77	0	485	0.81
B	21.11	74.44	0	4.44	0	270	1.01
A	0	33.33	55.56	11.11	0	36	0.648
C	53	47	0	0	0	100	1.003
E	2.23	83.8	7.26	6.7	0	179	1.128
M	8.8	2.4	0.8	5.6	82.4	250	-0.604
Position: 187
Aln	A	G	C	U	gap	Seq	Con
T	2.16	42.04	28.38	2.99	24.43	835	-0.298
3	0.21	47.63	48.04	4.12	0	485	0.774
B	0.37	79.63	19.63	0.37	0	270	1.217
A	0	44.44	55.56	0	0	36	1.009
C	5	93	2	0	0	100	1.574
E	0	0	89.39	10.61	0	179	1.512
M	4.8	10.8	0.8	2	81.6	250	-0.597
Position: 188
Aln	A	G	C	U	gap	Seq	Con
T	4.55	18.9	11.6	40.55	24.4	836	-0.53
3	6.38	31.28	12.55	49.59	0.21	486	0.322
B	9.96	49.45	9.59	30.63	0.37	271	0.282
A	11.11	36.11	47.22	5.56	0	36	0.374
C	1	3	23	73	0	100	0.963
E	0	2.79	10.06	87.15	0	179	1.35
M	2.4	1.2	5.2	10	81.2	250	-0.628
Position: 189
Aln	A	G	C	U	gap	Seq	Con
T	11.24	72.13	1.32	5.62	9.69	836	0.47
3	2.88	94.86	0.62	1.03	0.62	486	1.609
B	0	99.63	0	0	0.37	271	1.957
A	0	97.22	2.78	0	0	36	1.817
C	0	100	0	0	0	100	2
E	7.82	87.15	1.12	2.79	1.12	179	1.228
M	32	16.8	3.2	16.8	31.2	250	-0.698
Position: 190
Aln	A	G	C	U	gap	Seq	Con
T	91.65	1.55	1.19	0.72	4.89	838	1.353
3	97.94	2.06	0	0	0	486	1.855
B	100	0	0	0	0	271	2
A	97.22	2.78	0	0	0	36	1.817
C	100	0	0	0	0	100	2
E	94.97	5.03	0	0	0	179	1.712
M	76.19	1.19	3.97	2.38	16.27	252	0.56
Position: 191
Aln	A	G	C	U	gap	Seq	Con
T	89.27	3.93	0.48	1.67	4.65	839	1.236
3	94.24	5.56	0.21	0	0	486	1.669
B	100	0	0	0	0	271	2
A	100	0	0	0	0	36	2
C	100	0	0	0	0	100	2
E	84.36	15.08	0.56	0	0	179	1.34
M	75.49	2.37	1.19	5.53	15.42	253	0.535
Position: 192
Aln	A	G	C	U	gap	Seq	Con
T	9.18	7.27	56.14	22.29	5.13	839	0.136
3	2.47	8.85	68.52	20.16	0	486	0.719
B	0	15.87	78.97	5.17	0	271	1.089
A	25	0	50	25	0	36	0.5
C	0	2	51	47	0	100	0.88
E	1.68	0	56.42	41.9	0	179	0.909
M	25.69	6.32	34.39	16.6	17	253	-0.49
Position: 193
Aln	A	G	C	U	gap	Seq	Con
T	1.19	2.26	8.45	82.74	5.36	840	0.939
3	0.82	3.49	0.41	95.07	0.21	487	1.65
B	0	0	0.74	99.26	0	271	1.937
A	5.56	47.22	0	47.22	0	36	0.746
C	0	0	0	98	2	100	1.819
E	1.11	0	0	98.33	0.56	180	1.851
M	2.37	0.79	27.27	52.96	16.6	253	0.058
Position: 194
Aln	A	G	C	U	gap	Seq	Con
T	21.31	53.33	0.48	22.74	2.14	840	0.357
3	0.41	63.17	0	36.21	0.21	486	0.996
B	0.74	99.26	0	0	0	271	1.937
A	0	100	0	0	0	36	2
C	0	100	0	0	0	100	2
E	0	1.12	0	98.32	0.56	179	1.851
M	69.69	16.14	1.57	5.91	6.69	254	0.482
Position: 195
Aln	A	G	C	U	gap	Seq	Con
T	96.44	0.12	0	1.19	2.26	842	1.693
3	99.39	0.2	0	0	0.41	488	1.932
B	100	0	0	0	0	271	2
A	100	0	0	0	0	36	2
C	100	0	0	0	0	100	2
E	98.34	0.55	0	0	1.1	181	1.841
M	89.37	0	0	3.94	6.69	254	1.276
Position: 196
Aln	A	G	C	U	gap	Seq	Con
T	96.79	0.36	0	0.83	2.02	841	1.714
3	99.18	0.41	0	0.41	0	487	1.923
B	99.26	0.74	0	0	0	271	1.937
A	100	0	0	0	0	36	2
C	100	0	0	0	0	100	2
E	98.89	0	0	1.11	0	180	1.912
M	90.94	0.39	0	1.97	6.69	254	1.337
Position: 197
Aln	A	G	C	U	gap	Seq	Con
T	62.66	23.19	9.39	2.73	2.02	841	0.472
3	59.75	38.4	1.85	0	0	487	0.919
B	96.68	0	3.32	0	0	271	1.79
A	66.67	33.33	0	0	0	36	1.082
C	97	0	0	3	0	100	1.806
E	2.78	97.22	0	0	0	180	1.817
M	54.72	3.15	27.56	7.87	6.69	254	0.171
Position: 198
Aln	A	G	C	U	gap	Seq	Con
T	1.43	0.12	94.05	2.38	2.02	841	1.535
3	0.21	0	98.77	1.03	0	487	1.896
B	0	0	98.52	1.48	0	271	1.889
A	0	0	100	0	0	36	2
C	0	0	100	0	0	100	2
E	0.56	0	98.89	0.56	0	180	1.901
M	4.33	0.39	82.68	5.91	6.69	254	0.909
Position: 199
Aln	A	G	C	U	gap	Seq	Con
T	96.08	0.24	0.59	0.95	2.14	842	1.655
3	98.98	0.2	0.61	0	0.2	488	1.899
B	99.26	0	0.74	0	0	271	1.937
A	100	0	0	0	0	36	2
C	100	0	0	0	0	100	2
E	98.34	0.55	0.55	0	0.55	181	1.841
M	88.98	0.39	0.79	3.15	6.69	254	1.212
Position: 200
Aln	A	G	C	U	gap	Seq	Con
T	1.66	0	0.24	95.97	2.14	843	1.663
3	0	0	0	99.8	0.2	489	1.975
B	0	0	0	100	0	271	2
A	0	0	0	100	0	36	2
C	0	0	0	100	0	100	2
E	0	0	0	99.45	0.55	182	1.94
M	5.51	0	0.79	87.01	6.69	254	1.145
Position: 201
Aln	A	G	C	U	gap	Seq	Con
T	22.16	0.47	53.08	22.16	2.13	844	0.354
3	36.73	0	62.65	0.41	0.2	490	0.992
B	0	0	99.26	0.74	0	271	1.937
A	0	0	100	0	0	36	2
C	0	0	100	0	0	100	2
E	98.36	0	1.09	0	0.55	183	1.853
M	2.76	1.57	16.14	72.83	6.69	254	0.61
Position: 202
Aln	A	G	C	U	gap	Seq	Con
T	2.25	0.71	4.73	89.23	3.08	845	1.255
3	0.2	0	0.61	99.19	0	491	1.925
B	0	0	0	100	0	271	2
A	0	0	5.56	94.44	0	36	1.69
C	0	0	0	100	0	100	2
E	0.54	0	0.54	98.91	0	184	1.903
M	7.09	2.36	14.57	65.75	10.24	254	0.258
Position: 203
Aln	A	G	C	U	gap	Seq	Con
T	34.12	2.13	21.33	39.1	3.32	844	0.118
3	33.88	1.63	33.06	31.22	0.2	490	0.299
B	52.22	0	20.37	27.41	0	270	0.531
A	0	22.22	16.67	61.11	0	36	0.653
C	19	0	5	76	0	100	1.028
E	13.59	0	54.89	30.98	0.54	184	0.558
M	40.55	3.94	5.12	39.76	10.63	254	-0.017
Position: 204
Aln	A	G	C	U	gap	Seq	Con
T	77.28	1.07	5.68	4.14	11.83	845	0.616
3	98.98	0.2	0	0.81	0	491	1.911
B	100	0	0	0	0	271	2
A	94.44	0	0	5.56	0	36	1.69
C	100	0	0	0	0	100	2
E	98.37	0.54	0	1.09	0	184	1.865
M	26.38	3.15	18.9	12.2	39.37	254	-0.806
Position: 205
Aln	A	G	C	U	gap	Seq	Con
T	12.07	54.44	11.36	9.47	12.66	845	-0.155
3	15.89	66.4	7.54	10.18	0	491	0.569
B	0	96.68	0	3.32	0	271	1.79
A	0	100	0	0	0	36	2
C	0	98	0	2	0	100	1.859
E	42.39	15.22	20.11	22.28	0	184	0.114
M	9.45	14.17	23.23	11.02	42.13	254	-0.929
Position: 206
Aln	A	G	C	U	gap	Seq	Con
T	1.66	0.47	4.97	78.34	14.56	845	0.678
3	0.2	0	0	99.8	0	491	1.979
B	0	0	0	100	0	271	2
A	0	0	0	100	0	36	2
C	0	0	0	100	0	100	2
E	0.54	0	0	99.46	0	184	1.951
M	5.12	1.57	16.54	28.35	48.43	254	-0.734
Position: 207
Aln	A	G	C	U	gap	Seq	Con
T	77.12	0.47	3.54	3.42	15.45	848	0.612
3	94.33	0	4.25	1.01	0.4	494	1.62
B	99.26	0	0	0	0.74	271	1.922
A	100	0	0	0	0	36	2
C	100	0	0	0	0	100	2
E	86.1	0	11.23	2.67	0	187	1.32
M	34.65	1.57	3.54	9.45	50.79	254	-0.629
Position: 208
Aln	A	G	C	U	gap	Seq	Con
T	33.45	19.08	22.26	1.77	23.44	849	-0.529
3	48.89	13.74	35.96	1.01	0.4	495	0.464
B	22.51	16.97	59.41	0.37	0.74	271	0.538
A	0	52.78	36.11	11.11	0	36	0.631
C	19	77	3	1	0	100	1.036
E	96.28	1.6	2.13	0	0	188	1.734
M	9.06	6.69	3.15	3.54	77.56	254	-0.738
Position: 209
Aln	A	G	C	U	gap	Seq	Con
T	2.83	29.28	41.56	2.72	23.61	847	-0.296
3	3.65	49.49	46.65	0.2	0	493	0.792
B	0	20.37	79.26	0.37	0	270	1.237
A	0	55.56	44.44	0	0	36	1.009
C	0	2	94	4	0	100	1.617
E	9.63	90.37	0	0	0	187	1.543
M	2.36	0.79	11.02	7.09	78.74	254	-0.65
Position: 210
Aln	A	G	C	U	gap	Seq	Con
T	4.95	4.12	48.76	17.79	24.38	849	-0.337
3	5.66	6.67	73.13	14.55	0	495	0.77
B	4.43	0	71.22	24.35	0	271	0.956
A	11.11	55.56	33.33	0	0	36	0.648
C	0	0	46	54	0	100	1.005
E	6.38	6.91	83.51	3.19	0	188	1.104
M	5.51	0.79	2.36	9.84	81.5	254	-0.613
Position: 211
Aln	A	G	C	U	gap	Seq	Con
T	14.94	49.29	6.71	4.59	24.47	850	-0.365
3	14.11	70.56	10.69	4.64	0	496	0.696
B	24.72	50.92	15.87	8.49	0	271	0.282
A	2.78	88.89	8.33	0	0	36	1.407
C	38	60	2	0	0	100	0.914
E	1.06	95.24	3.7	0	0	189	1.687
M	7.48	3.54	0.79	6.3	81.89	254	-0.631
Position: 212
Aln	A	G	C	U	gap	Seq	Con
T	5.77	56.18	10.48	3.06	24.5	849	-0.187
3	1.62	78.79	17.37	2.22	0	495	1.072
B	0.74	72.69	22.51	4.06	0	271	0.941
A	8.33	55.56	36.11	0	0	36	0.699
C	18	82	0	0	0	100	1.32
E	1.6	92.02	6.38	0	0	188	1.541
M	9.06	1.97	1.18	5.91	81.89	254	-0.616
Position: 213
Aln	A	G	C	U	gap	Seq	Con
T	69.47	0.94	1.75	1.64	26.2	855	0.342
3	95.41	1.4	1.8	0.8	0.6	501	1.633
B	99.26	0	0	0	0.74	271	1.922
A	100	0	0	0	0	36	2
C	91	0	4	5	0	100	1.474
E	89.18	3.61	4.64	2.06	0.52	194	1.309
M	9.84	0.39	0.79	1.97	87.01	254	-0.442
Position: 214
Aln	A	G	C	U	gap	Seq	Con
T	1.87	72.31	0.35	0.47	25	856	0.49
3	2.39	97.21	0	0	0.4	502	1.792
B	0.37	99.26	0	0	0.37	271	1.922
A	0	100	0	0	0	36	2
C	0	100	0	0	0	100	2
E	5.64	93.85	0	0	0.51	195	1.631
M	1.57	12.2	1.18	1.57	83.46	254	-0.522
Position: 215
Aln	A	G	C	U	gap	Seq	Con
T	1.05	71.96	0.7	1.05	25.23	856	0.464
3	0.2	97.61	0.2	0.6	1.39	502	1.772
B	0.37	97.05	0	0.37	2.21	271	1.732
A	0	100	0	0	0	36	2
C	0	100	0	0	0	100	2
E	0	97.95	0.51	1.03	0.51	195	1.815
M	3.15	10.24	1.97	2.36	82.28	254	-0.61
Position: 216
Aln	A	G	C	U	gap	Seq	Con
T	73.98	0.23	0.23	1.4	24.15	857	0.573
3	99.2	0.2	0.2	0	0.4	503	1.913
B	99.63	0	0	0	0.37	271	1.957
A	100	0	0	0	0	36	2
C	100	0	0	0	0	100	2
E	98.47	0.51	0.51	0	0.51	196	1.851
M	13.78	0.39	0.39	4.72	80.71	254	-0.529
Position: 217
Aln	A	G	C	U	gap	Seq	Con
T	67.44	7.35	0.23	0.93	24.04	857	0.281
3	87.08	12.13	0.4	0.2	0.2	503	1.386
B	91.14	8.86	0	0	0	271	1.568
A	72.22	27.78	0	0	0	36	1.148
C	99	1	0	0	0	100	1.919
E	84.18	13.78	1.02	0.51	0.51	196	1.242
M	16.14	0.39	0	2.76	80.71	254	-0.463
Position: 218
Aln	A	G	C	U	gap	Seq	Con
T	59.25	13.35	2.46	6.56	18.38	854	-0.041
3	75.6	21.2	2.4	0.8	0	500	1.036
B	66.79	30.22	2.24	0.75	0	268	0.914
A	58.33	33.33	8.33	0	0	36	0.719
C	90	4	0	6	0	100	1.434
E	90.82	6.63	1.53	1.02	0	196	1.454
M	14.96	1.57	3.94	18.11	61.42	254	-0.795
Position: 219
Aln	A	G	C	U	gap	Seq	Con
T	71.88	3.62	1.17	4.9	18.44	857	0.378
3	95.43	4.37	0	0	0.2	503	1.716
B	91.88	8.12	0	0	0	271	1.594
A	100	0	0	0	0	36	2
C	100	0	0	0	0	100	2
E	99.49	0	0	0	0.51	196	1.944
M	14.17	3.54	3.94	16.54	61.81	254	-0.849
Position: 220
Aln	A	G	C	U	gap	Seq	Con
T	2.22	69.78	1.05	3.5	23.45	857	0.318
3	0.4	95.83	0.2	3.58	0	503	1.72
B	0	93.73	0	6.27	0	271	1.662
A	0	100	0	0	0	36	2
C	2	95	0	3	0	100	1.665
E	1.02	97.96	0.51	0.51	0	196	1.826
M	5.91	8.27	3.15	3.54	79.13	254	-0.716
Position: 221
Aln	A	G	C	U	gap	Seq	Con
T	74.56	0.35	0.58	1.05	23.46	861	0.584
3	98.42	0.2	0.2	1.18	0	507	1.866
B	97.82	0	0	2.18	0	275	1.848
A	100	0	0	0	0	36	2
C	100	0	0	0	0	100	2
E	98.98	0.51	0.51	0	0	196	1.908
M	16.93	0.79	1.57	1.18	79.53	254	-0.512
Position: 222
Aln	A	G	C	U	gap	Seq	Con
T	73.4	0.23	2.32	0.23	23.81	861	0.537
3	96.25	0	3.55	0	0.2	507	1.754
B	94.18	0	5.82	0	0	275	1.68
A	100	0	0	0	0	36	2
C	99	1	0	0	0	100	1.919
E	98.47	0	1.02	0	0.51	196	1.862
M	17.72	0.39	0.79	0.79	80.31	254	-0.444
Position: 223
Aln	A	G	C	U	gap	Seq	Con
[truncated: 24,136 more rows]
