# Supplementary material
Source: HighWire-hosted journal article supplement (doi:10.1101/rna.079687.123)
Supplement: Supplemental_Data_2_.xlsx [file Supplemental_Data_2_.xlsx]

## Sheet: 5S
Helix 1	Base Pair (1:119)		BPC: cWW	AI: --	Strong
Frequency
Aln	GC	CG	UA	AU	GU	UG	AA	AC	AG	CA	CC	CU	GA	GG	UC	UU	gap	Seq
3	*5.2	*0.7	*8.7	*2.6	0.5	1.3	0.3	0.5	0.3	0.2	0.2	0.2	0.2	--	0.3	2.3	76.6	611
B	*18.8	--	*35.4	*9.7	0.7	5.6	1.4	2.1	1.4	1.4	0.7	0.7	--	--	1.4	11.8	9	144
A	*11.4	*6.8	*13.6	*4.5	4.5	--	--	--	--	--	--	--	2.3	--	--	2.3	54.5	44
E	--	--	--	--	--	--	--	--	--	--	--	--	--	--	--	--	100	1
Helix 1	Base Pair (2:118)		BPC: cWW	AI: --	Strong
Frequency
Aln	GC	CG	UA	AU	GU	UG	AA	AC	AG	CA	CC	CU	GA	GG	UC	UU	gap	Seq
3	*20.0	*1.8	*3.8	*3.8	0.5	1.3	0.5	1.8	0.2	--	0.2	0.2	0.3	--	0.7	0.7	64.4	610
B	*54.8	*2.7	*10.5	*10.0	1.4	4.1	1.4	5.5	--	--	0.5	0.5	0.9	--	1.8	1.8	4.1	219
A	*27.9	*16.3	--	*4.7	2.3	--	--	--	2.3	--	--	--	--	--	--	--	46.5	43
E	--	--	--	--	--	--	--	--	--	--	--	--	--	--	--	--	100	1
Helix 1	Base Pair (3:117)		BPC: cWW	AI: --	Strong
Frequency
Aln	GC	CG	UA	AU	GU	UG	AA	AC	AG	CA	CC	CU	GA	GG	UC	UU	gap	Seq
3	*27.2	*23.4	*9.0	*23.3	0.7	9.6	0.3	0.7	0.2	--	0.2	0.2	0.2	0.2	0.7	0.7	3.7	602
B	*2.1	*50.9	*18.6	*1.1	--	20.7	--	0.4	--	--	0.4	0.7	0.4	0.7	1.4	1.4	1.4	285
A	*36.4	*15.9	*4.5	*15.9	--	--	--	--	--	--	--	--	--	--	--	--	27.3	44
E	*49.7	*0.3	*0.7	*46.2	1.7	--	0.3	1	--	--	--	--	--	--	--	--	--	292
Helix 1	Base Pair (4:116)		BPC: cWW	AI: --	Strong
Frequency
Aln	GC	CG	UA	AU	GU	UG	AA	AC	AG	CA	CC	CU	GA	GG	UC	UU	gap	Seq
3	*9.1	*46.2	*13.0	*2.5	5.6	13.4	--	0.2	0.2	0.2	0.3	0.2	0.3	0.3	0.2	6.9	1.5	606
B	*2.3	*60.9	*14.7	*1.7	1	15.7	--	--	--	0.3	0.7	0.3	0.7	--	0.3	0.3	1	299
A	*9.1	*20.5	*20.5	*11.4	--	20.5	--	--	--	--	--	--	--	--	--	2.3	15.9	44
E	*15.1	*35.4	10	1.7	10.7	9.6	--	0.3	0.3	--	--	--	--	1.7	--	*14.4	0.7	291
Helix 1	Base Pair (5:115)		BPC: cWW	AI: --	Strong
Frequency
Aln	GC	CG	UA	AU	GU	UG	AA	AC	AG	CA	CC	CU	GA	GG	UC	UU	gap	Seq
3	*8.6	*31.1	*41.8	*11.0	0.3	3.8	0.2	--	1.2	0.7	--	--	--	--	--	0.2	1.3	608
B	*3.3	*18.4	*70.6	*0.3	--	3	0.3	--	2.3	0.3	--	--	--	--	--	--	1.3	299
A	*2.3	*13.6	*38.6	*31.8	--	6.8	--	--	--	2.3	--	--	--	--	--	--	4.5	44
E	*14.3	*46.8	*13.3	*18.1	0.7	4.4	0.3	--	--	0.7	--	--	--	0.3	--	0.3	0.7	293
Helix 1	Base Pair (6:114)		BPC: cWW	AI: --	Strong
Frequency
Aln	GC	CG	UA	AU	GU	UG	AA	AC	AG	CA	CC	CU	GA	GG	UC	UU	gap	Seq
3	*47.8	*7.1	*33.2	*9.4	1	0.7	0.2	0.3	--	--	--	0.2	--	--	--	--	0.3	609
B	*89.7	*1.3	*0.3	*4.7	1.7	1	--	--	--	--	0.3	0.3	--	--	--	--	0.7	300
A	*65.9	*15.9	--	*15.9	2.3	--	--	--	--	--	--	--	--	--	--	--	--	44
E	*4.1	*11.9	*69.0	*12.6	--	0.3	0.3	0.7	--	--	--	--	--	--	0.3	0.3	0.3	294
Helix 1	Base Pair (7:113)		BPC: cWW	AI: --	Strong
Frequency
Aln	GC	CG	UA	AU	GU	UG	AA	AC	AG	CA	CC	CU	GA	GG	UC	UU	gap	Seq
3	*59.0	*1.3	*4.4	*33.9	0.8	0.2	--	0.2	--	--	--	--	0.2	--	--	--	--	610
B	*89.4	--	*0.3	*7.6	1.3	--	--	0.3	--	--	--	--	--	--	0.3	--	0.7	301
A	*72.7	*15.9	--	*9.1	2.3	--	--	--	--	--	--	--	--	--	--	--	--	44
E	*25.9	*0.3	*8.8	*63.9	--	--	--	--	--	0.3	--	--	0.3	--	--	--	0.3	294
Helix 1	Base Pair (8:112)		BPC: cWW	AI: --	Strong
Frequency
Aln	GC	CG	UA	AU	GU	UG	AA	AC	AG	CA	CC	CU	GA	GG	UC	UU	gap	Seq
3	*2.5	*70.0	*0.5	*0.7	0.3	25.9	--	--	--	--	0.2	--	--	--	--	--	--	611
B	*2.0	39.5	1.3	*1.3	--	*55.1	--	--	--	--	--	--	--	0.3	--	--	0.3	301
A	--	97.7	--	--	--	2.3	--	--	--	--	--	--	--	--	--	--	--	44
E	*3.4	*94.9	--	--	0.3	0.7	--	--	--	--	0.3	--	--	0.3	--	--	--	295
Helix 1	Base Pair (9:111)		BPC: cWW	AI: --	Strong
Frequency
Aln	GC	CG	UA	AU	GU	UG	AA	AC	AG	CA	CC	CU	GA	GG	UC	UU	gap	Seq
3	42.5	*0.7	*0.3	2.5	*52.5	0.2	--	*0.2	--	--	--	--	0.5	--	--	--	0.8	610
B	*63.6	*0.7	*0.7	*3.6	28.8	0.7	--	--	--	--	--	--	--	--	--	--	2	302
A	38.6	--	--	2.3	59.1	--	--	--	--	--	--	--	--	--	--	--	--	44
E	24.1	*0.7	*0.3	1	*72.1	--	--	*0.3	--	--	--	--	1	--	0.3	--	--	294
Helix 1	Base Pair (10:110)		BPC: cWW	AI: --	Strong
Frequency
Aln	GC	CG	UA	AU	GU	UG	AA	AC	AG	CA	CC	CU	GA	GG	UC	UU	gap	Seq
3	*51.1	*2.5	*5.6	*32.6	5.2	0.3	0.7	1.1	0.2	0.2	--	--	--	--	0.2	0.2	0.3	611
B	*39.4	*4.3	*6.6	*43.7	2.6	0.7	1.3	0.7	0.3	--	--	--	--	--	--	--	0.3	302
A	*93.2	--	--	*2.3	--	--	--	--	--	--	--	--	--	--	--	--	4.5	44
E	*55.3	*1.0	*5.4	*26.8	8.5	--	--	2	--	0.3	--	--	--	--	0.3	0.3	--	295
Helix 2	Base Pair (16:68)		BPC: cWW	AI: --	Strong
Frequency
Aln	GC	CG	UA	AU	GU	UG	AA	AC	AG	CA	CC	CU	GA	GG	UC	UU	gap	Seq
3	*57.5	*32.5	*7.9	*0.7	0.7	0.7	--	0.2	--	--	--	--	--	--	--	--	--	610
B	*86.4	*3.3	*5.3	*1.0	1.7	1.3	--	0.3	--	--	0.3	--	0.3	--	--	--	--	302
A	*97.7	--	--	*2.3	--	--	--	--	--	--	--	--	--	--	--	--	--	44
E	*22.8	*65.3	*11.9	--	--	--	--	--	--	--	--	--	--	--	--	--	--	294
Helix 2	Base Pair (17:67)		BPC: cWW	AI: --	Strong
Frequency
Aln	GC	CG	UA	AU	GU	UG	AA	AC	AG	CA	CC	CU	GA	GG	UC	UU	gap	Seq
3	*9.0	*69.9	*7.7	*5.7	--	3.1	0.2	--	--	3.9	--	--	0.2	0.3	--	--	--	611
B	*2.0	*75.5	*3.0	*5.3	--	5.6	0.3	--	--	6.6	--	--	--	--	--	--	1.7	302
A	*2.3	*81.8	*13.6	--	--	--	--	--	--	2.3	--	--	--	--	--	--	--	44
E	*16.6	*61.0	*13.2	*6.8	--	1	--	--	--	0.7	--	--	--	0.7	--	--	--	295
Helix 2	Base Pair (18:65)		BPC: cWW	AI: --	Strong
Frequency
Aln	GC	CG	UA	AU	GU	UG	AA	AC	AG	CA	CC	CU	GA	GG	UC	UU	gap	Seq
3	*36.0	*3.9	*5.4	*42.7	9.7	0.2	0.5	0.8	--	0.2	0.2	0.2	0.3	--	--	--	--	611
B	*54.6	*2.0	*4.0	*16.9	20.2	--	0.3	1	--	--	0.3	0.3	0.3	--	--	--	--	302
A	*90.9	--	--	*4.5	4.5	--	--	--	--	--	--	--	--	--	--	--	--	44
E	*9.8	*7.1	*7.5	*73.2	0.3	0.3	0.7	0.7	--	--	0.3	--	--	--	--	--	--	295
Helix 2	Base Pair (19:64)		BPC: cWW	AI: --	Strong
Frequency
Aln	GC	CG	UA	AU	GU	UG	AA	AC	AG	CA	CC	CU	GA	GG	UC	UU	gap	Seq
3	*23.0	*30.2	*18.9	*23.0	1.3	0.8	0.2	0.5	0.3	0.7	0.5	--	--	0.3	0.2	0.2	--	609
B	*22.8	*14.9	*26.2	*31.1	2	0.7	0.3	0.3	--	0.3	--	--	0.3	0.3	0.3	0.3	--	302
A	*77.3	4.5	--	*9.1	--	*6.8	--	2.3	--	--	--	--	--	--	--	--	--	44
E	*15.0	*49.8	*14.7	*16.4	1	--	--	0.3	0.3	1	1	--	--	0.3	--	--	--	293
Helix 2	Base Pair (20:63)		BPC: cWW	AI: --	Strong
Frequency
Aln	GC	CG	UA	AU	GU	UG	AA	AC	AG	CA	CC	CU	GA	GG	UC	UU	gap	Seq
3	*36.1	*23.6	*14.9	*18.4	3	0.7	--	0.8	--	--	0.2	--	--	--	0.8	1.5	--	609
B	*30.1	*8.9	*23.8	*29.8	3.3	0.7	--	--	--	--	--	--	--	--	0.7	2.6	--	302
A	*18.2	*45.5	*6.8	*13.6	9.1	4.5	--	--	--	--	--	--	--	--	--	2.3	--	44
E	*45.1	*34.8	*8.9	*7.2	1.7	0.3	--	1.7	--	--	--	--	--	--	0.3	--	--	293
Helix 2	Base Pair (21:62)		BPC: cWW	AI: --	Strong
Frequency
Aln	GC	CG	UA	AU	GU	UG	AA	AC	AG	CA	CC	CU	GA	GG	UC	UU	gap	Seq
3	*37.2	*17.5	*19.0	*16.9	2.6	3.6	--	1.1	0.3	0.3	0.2	0.2	0.2	0.2	--	0.7	--	610
B	*57.6	*4.3	*14.6	*15.9	3.6	1.7	--	0.3	0.3	--	--	--	0.3	--	--	1.3	--	302
A	*63.6	*11.4	*2.3	*18.2	2.3	--	--	--	--	--	2.3	--	--	--	--	--	--	44
E	*15.0	*32.3	*25.9	*17.3	1.7	6.1	--	--	0.3	0.7	--	0.3	--	0.3	--	--	--	294
Helix 2	Base Pair (22:61)		BPC: cWW	AI: --	Strong
Frequency
Aln	GC	CG	UA	AU	GU	UG	AA	AC	AG	CA	CC	CU	GA	GG	UC	UU	gap	Seq
3	*25.7	*10.2	*29.2	*16.2	0.7	15.2	--	0.2	0.3	--	0.2	--	--	1.6	0.2	0.3	--	610
B	*29.1	5.3	11.6	*22.5	1	*29.8	--	--	--	--	--	--	--	--	--	0.7	--	302
A	*93.2	--	--	*4.5	2.3	--	--	--	--	--	--	--	--	--	--	--	--	44
E	*12.6	*18.7	*50.7	*11.9	0.7	3.7	--	0.3	0.7	--	0.3	--	--	--	0.3	--	--	294
Helix 2	Base Pair (23:60)		BPC: cWW	AI: --	Strong
Frequency
Aln	GC	CG	UA	AU	GU	UG	AA	AC	AG	CA	CC	CU	GA	GG	UC	UU	gap	Seq
3	*79.5	*0.8	0.2	1.1	1.6	0.5	--	1.6	0.2	--	0.3	1	2.1	0.5	8.9	*1.5	0.2	609
B	*82.1	*1.7	--	*3.0	0.3	0.3	--	0.3	--	--	--	--	4.3	1	4.7	2	0.3	301
A	*65.9	--	*2.3	--	15.9	2.3	--	2.3	--	--	--	--	--	--	11.4	--	--	44
E	*78.0	*0.3	--	*1.7	0.7	0.3	--	2.7	0.3	--	0.7	0.3	0.3	--	13.5	0.3	0.7	296
Helix 2	Base Pair (28:56)		BPC: cWW	AI: --	Strong
Frequency
Aln	GC	CG	UA	AU	GU	UG	AA	AC	AG	CA	CC	CU	GA	GG	UC	UU	gap	Seq
3	0.2	20.9	--	2.3	0.5	0.7	--	0.3	--	0.3	2.8	*62.2	--	*0.2	*7.7	2	--	611
B	--	*46.0	--	*4.3	0.3	--	--	--	--	--	1	46	--	--	*1.3	1	--	302
A	--	--	--	2.3	--	2.3	--	--	--	2.3	--	*77.3	--	*2.3	--	13.6	--	44
E	0.3	--	--	--	0.7	1	--	0.7	--	0.3	4.7	*75.5	--	--	*14.8	1.7	0.3	298
Helix 2	Base Pair (29:55)		BPC: cWW	AI: --	Strong
Frequency
Aln	GC	CG	UA	AU	GU	UG	AA	AC	AG	CA	CC	CU	GA	GG	UC	UU	gap	Seq
3	*10.5	--	*5.9	*83.3	0.2	--	--	0.2	--	--	--	--	--	--	--	--	--	611
B	*9.6	--	*0.3	*89.7	0.3	--	--	--	--	--	--	--	--	--	--	--	--	302
A	*2.3	--	*34.1	*63.6	--	--	--	--	--	--	--	--	--	--	--	--	--	44
E	*12.1	--	*6.7	*80.2	0.3	--	--	0.3	--	--	--	--	--	--	--	--	0.3	298
Helix 2	Base Pair (30:54)		BPC: cWW	AI: --	Strong
Frequency
Aln	GC	CG	UA	AU	GU	UG	AA	AC	AG	CA	CC	CU	GA	GG	UC	UU	gap	Seq
3	*2.8	*94.9	*1.6	*0.2	--	0.2	--	--	--	--	0.2	--	--	0.2	--	--	--	611
B	--	99.3	--	--	--	0.3	--	--	--	--	0.3	--	--	--	--	--	--	302
A	--	*88.6	*11.4	--	--	--	--	--	--	--	--	--	--	--	--	--	--	44
E	*5.7	*91.9	*1.7	*0.3	--	--	--	--	--	--	--	--	--	0.3	--	--	--	298
Helix 2	Base Pair (31:51)		BPC: cWW	AI: --	Strong
Frequency
Aln	GC	CG	UA	AU	GU	UG	AA	AC	AG	CA	CC	CU	GA	GG	UC	UU	gap	Seq
3	*5.2	*85.3	*4.1	*0.3	0.2	0.5	0.7	--	--	2	0.2	0.8	0.2	--	0.7	--	--	611
B	--	*88.1	*5.0	--	--	0.7	1	--	--	3.6	--	--	0.3	--	1.3	--	--	302
A	--	97.7	--	--	--	--	--	--	--	2.3	--	--	--	--	--	--	--	44
E	*10.7	*81.5	*4.0	*0.7	0.3	0.3	0.3	--	--	--	0.3	1.7	--	--	--	--	--	298
Helix 2	Base Pair (32:50)		BPC: cWW	AI: --	Strong
Frequency
Aln	GC	CG	UA	AU	GU	UG	AA	AC	AG	CA	CC	CU	GA	GG	UC	UU	gap	Seq
3	*33.8	*38.4	*22.0	*4.6	--	0.8	--	--	0.2	0.2	0.2	--	--	--	--	--	--	610
B	*0.3	*57.6	*40.1	--	--	1.3	--	--	--	0.3	0.3	--	--	--	--	--	--	302
A	--	*63.6	*34.1	--	--	--	--	--	2.3	--	--	--	--	--	--	--	--	44
E	*70.4	*16.5	*2.7	*10.1	--	0.3	--	--	--	--	--	--	--	--	--	--	--	297
Helix 2	Base Pair (33:49)		BPC: cWW	AI: --	Strong
Frequency
Aln	GC	CG	UA	AU	GU	UG	AA	AC	AG	CA	CC	CU	GA	GG	UC	UU	gap	Seq
3	*70.7	*21.1	*2.3	*4.3	0.2	1.1	--	--	--	--	--	--	--	0.3	--	--	--	611
B	*81.1	*10.6	*0.7	*6.6	0.3	0.3	--	--	--	--	--	--	--	0.3	--	--	--	302
A	100	--	--	--	--	--	--	--	--	--	--	--	--	--	--	--	--	44
E	*56.7	*33.6	*5.0	*2.3	--	2	--	--	--	--	--	--	--	0.3	--	--	--	298
Helix 2	Base Pair (34:48)		BPC: cWW	AI: --	Strong
Frequency
Aln	GC	CG	UA	AU	GU	UG	AA	AC	AG	CA	CC	CU	GA	GG	UC	UU	gap	Seq
3	*9.8	--	*32.9	*57.0	0.2	--	--	--	--	--	--	--	--	--	0.2	--	--	611
B	*13.2	--	*32.8	*53.6	0.3	--	--	--	--	--	--	--	--	--	--	--	--	302
A	*25.0	--	*47.7	*27.3	--	--	--	--	--	--	--	--	--	--	--	--	--	44
E	*4.4	--	*31.5	*63.4	--	--	--	--	--	--	--	--	--	--	0.3	--	0.3	298
Helix 3	Base Pair (70:106)		BPC: cWW	AI: --	Strong
Frequency
Aln	GC	CG	UA	AU	GU	UG	AA	AC	AG	CA	CC	CU	GA	GG	UC	UU	gap	Seq
3	*9.2	*78.2	*5.1	*1.6	--	0.5	1.1	--	--	0.2	--	--	--	--	0.3	3.8	--	610
B	*9.6	*84.1	*3.3	*1.3	--	0.3	--	--	0.3	0.3	--	--	--	--	0.3	--	0.3	302
A	--	*2.3	25	--	--	--	*18.2	--	--	--	--	--	--	--	2.3	*52.3	--	44
E	*9.4	*84.5	*3.4	*2.0	--	0.7	--	--	--	--	--	--	--	--	--	--	--	297
Helix 3	Base Pair (71:105)		BPC: cWW	AI: --	Strong
Frequency
Aln	GC	CG	UA	AU	GU	UG	AA	AC	AG	CA	CC	CU	GA	GG	UC	UU	gap	Seq
3	*8.9	*66.7	*9.7	*3.1	1	8.2	--	--	0.2	--	--	0.2	--	--	--	2.1	--	609
B	--	*85.8	*3.0	*1.0	--	9.3	--	--	--	0.3	--	--	--	--	--	0.3	0.3	302
A	*4.5	*2.3	*29.5	*11.4	--	20.5	--	--	2.3	--	--	2.3	--	--	--	27.3	--	44
E	*17.9	*56.4	*13.5	*3.7	2	6.4	--	--	--	--	--	--	--	--	--	--	--	296
Helix 3	Base Pair (72:104)		BPC: cWW	AI: --	Strong
Frequency
Aln	GC	CG	UA	AU	GU	UG	AA	AC	AG	CA	CC	CU	GA	GG	UC	UU	gap	Seq
3	7.7	*14.8	15.6	*10.0	1.1	4.8	7.4	0.3	--	0.5	0.8	--	*34.9	--	*0.5	1.1	0.5	610
B	0.3	--	1	*1.3	0.3	--	15.3	0.7	--	0.7	*1.3	--	*76.7	--	1	--	1.3	301
A	*27.3	*31.8	*13.6	*9.1	2.3	--	--	--	--	2.3	--	--	--	--	--	13.6	--	44
E	*12.1	*27.2	*30.2	*18.5	1.7	9.7	--	--	--	--	0.3	--	--	--	--	0.3	--	298
Helix 3	Base Pair (73:103)		BPC: cWW	AI: --	Strong
Frequency
Aln	GC	CG	UA	AU	GU	UG	AA	AC	AG	CA	CC	CU	GA	GG	UC	UU	gap	Seq
3	*31.0	*5.6	*3.6	*57.0	0.8	1.5	--	0.2	--	--	--	--	0.2	--	--	--	0.2	610
B	*0.3	--	*1.3	*95.7	0.3	1	0.3	0.3	--	--	--	--	0.3	--	--	--	0.3	302
A	*15.9	*40.9	*27.3	*2.3	--	11.4	--	--	--	--	--	--	--	--	--	--	2.3	44
E	*63.0	*5.7	*2.0	*26.9	2	0.3	--	--	--	--	--	--	--	--	--	--	--	297
Helix 3	Base Pair (74:102)		BPC: cWW	AI: --	Strong
Frequency
Aln	GC	CG	UA	AU	GU	UG	AA	AC	AG	CA	CC	CU	GA	GG	UC	UU	gap	Seq
3	*36.8	2.8	1.1	2.9	0.8	*37.5	*3.3	9.2	0.2	3.1	--	*0.5	0.2	0.3	0.3	1	--	611
B	--	0.3	0.7	1	--	*80.5	*7.3	1.3	0.7	6.3	--	--	0.3	0.7	0.7	--	0.3	302
A	*34.1	*18.2	*11.4	*15.9	6.8	2.3	--	2.3	--	--	--	--	--	--	--	9.1	--	44
E	*72.5	*4.0	*0.3	*3.0	0.7	0.3	--	17.4	--	--	--	1	--	--	--	0.7	--	298
Helix 3	Base Pair (75:101) Tertiary			AI: B	Strong
Frequency
Aln	GC	CG	UA	AU	GU	UG	AA	AC	AG	CA	CC	CU	GA	GG	UC	UU	gap	Seq
3	1.1	--	1.6	*27.3	--	*1.3	3.9	11.5	11.1	--	*0.2	--	*40.9	0.2	0.5	0.2	0.2	611
B	--	--	2.6	0.3	--	--	3	0.3	*5.0	--	*0.3	--	*88.1	0.3	--	--	--	302
A	*52.3	*6.8	*18.2	*4.5	2.3	2.3	--	--	--	--	--	--	--	--	9.1	4.5	--	44
E	--	--	--	57.7	--	--	2.7	20.8	18.8	--	--	--	--	--	--	--	--	298
Helix 3	Base Pair (76:100) Tertiary			AI: B	Strong
Frequency
Aln	GC	CG	UA	AU	GU	UG	AA	AC	AG	CA	CC	CU	GA	GG	UC	UU	gap	Seq
3	1	--	--	--	0.2	--	13.7	*0.2	0.2	0.2	--	--	*52.5	32.1	--	--	--	611
B	--	--	--	--	0.3	--	*29.8	0.3	0.7	0.3	--	--	1	*67.5	--	--	--	302
A	*31.8	*11.4	*11.4	*20.5	4.5	6.8	--	--	--	2.3	--	--	--	--	2.3	9.1	--	44
E	--	--	--	--	--	--	--	--	--	--	--	--	99.7	0.3	--	--	--	298
Helix 3	Base Pair (77:99) Tertiary			AI: B	Strong
Frequency
Aln	GC	CG	UA	AU	GU	UG	AA	AC	AG	CA	CC	CU	GA	GG	UC	UU	gap	Seq
3	--	*1.0	*98.7	--	--	0.2	0.2	--	--	--	--	--	--	--	--	--	--	611
B	--	--	98.7	--	--	0.3	0.3	--	--	--	--	--	--	--	--	--	0.7	302
A	--	*13.6	*86.4	--	--	--	--	--	--	--	--	--	--	--	--	--	--	44
E	--	--	99.7	--	--	0.3	--	--	--	--	--	--	--	--	--	--	--	298
Helix 3	Base Pair (78:98) Tertiary			AI: B	Significant
Frequency
Aln	GC	CG	UA	AU	GU	UG	AA	AC	AG	CA	CC	CU	GA	GG	UC	UU	gap	Seq
3	--	--	0.3	0.5	--	--	5.2	0.3	*92.3	*0.7	--	--	0.2	0.3	--	--	0.2	611
B	--	--	0.3	1.3	--	--	10.6	0.7	*85.8	--	--	--	*0.3	0.7	--	--	0.3	302
A	--	--	2.3	--	--	--	2.3	--	*86.4	*9.1	--	--	--	--	--	--	--	44
E	--	--	--	--	--	--	--	--	100	--	--	--	--	--	--	--	--	298
Helix 3	Base Pair (79:97)		BPC: cWW	AI: --	Strong
Frequency
Aln	GC	CG	UA	AU	GU	UG	AA	AC	AG	CA	CC	CU	GA	GG	UC	UU	gap	Seq
3	*15.9	*66.2	*2.0	*0.5	15.1	--	--	0.2	--	--	--	--	--	--	--	0.2	--	610
B	15.9	*48.2	*1.3	1	*33.2	--	--	--	--	--	--	--	--	--	--	0.3	--	301
A	*13.6	*86.4	--	--	--	--	--	--	--	--	--	--	--	--	--	--	--	44
E	*16.1	*80.9	*2.7	--	--	--	--	0.3	--	--	--	--	--	--	--	--	--	298
Helix 3	Base Pair (80:96)		BPC: cWW	AI: --	Significant
Frequency
Aln	GC	CG	UA	AU	GU	UG	AA	AC	AG	CA	CC	CU	GA	GG	UC	UU	gap	Seq
3	*0.3	8.5	0.2	--	0.2	*89.2	--	--	--	--	--	*0.2	--	0.2	0.2	1.1	--	611
B	*0.3	3.6	0.3	--	--	*94.7	--	--	--	--	--	--	--	0.7	--	0.3	--	302
A	--	--	--	--	--	100	--	--	--	--	--	--	--	--	--	--	--	44
E	*0.7	14.8	--	--	0.3	*80.9	--	--	--	--	--	*0.3	--	--	0.3	2.7	--	298
Helix 3	Base Pair (81:95)		BPC: cWW	AI: --	Strong
Frequency
Aln	GC	CG	UA	AU	GU	UG	AA	AC	AG	CA	CC	CU	GA	GG	UC	UU	gap	Seq
3	17.4	*2.0	*3.9	17.7	*28.7	--	--	*3.0	0.3	--	1	0.7	--	--	3.9	21.1	0.3	610
B	10	*1.0	2	9	*51.2	0.3	--	--	0.7	--	2	1.3	--	--	*8.6	13	1	301
A	36.4	--	--	11.4	52.3	--	--	--	--	--	--	--	--	--	--	--	--	44
E	*22.1	*3.0	6.4	26.8	4.4	--	--	6	--	--	--	--	--	--	--	*31.2	--	298
Helix 3	Base Pair (82:94)		BPC: cWW	AI: --	Strong
Frequency
Aln	GC	CG	UA	AU	GU	UG	AA	AC	AG	CA	CC	CU	GA	GG	UC	UU	gap	Seq
3	*34.7	*27.5	*22.5	*9.5	1.2	1.6	--	--	0.3	--	0.2	0.2	0.2	--	1.3	0.2	0.7	608
B	*19.0	*35.3	*32.7	*4.0	0.7	2.7	--	--	0.3	--	0.3	0.3	0.3	--	2.7	0.3	1.3	300
A	*40.9	*29.5	*6.8	*22.7	--	--	--	--	--	--	--	--	--	--	--	--	--	44
E	*47.1	*21.5	*15.2	*12.5	2.4	0.7	--	--	0.3	--	0.3	--	--	--	--	--	--	297
Helix 3	Base Pair (83:93)		BPC: cWW	AI: --	Strong
Frequency
Aln	GC	CG	UA	AU	GU	UG	AA	AC	AG	CA	CC	CU	GA	GG	UC	UU	gap	Seq
3	*71.5	*5.2	*1.0	*15.5	2.5	--	--	--	0.2	0.7	0.2	--	0.5	0.2	0.2	0.3	2.1	611
B	*64.2	*4.3	*1.7	*18.5	2.3	0.3	--	--	0.3	1.7	--	--	1	--	0.3	0.7	4.6	302
A	*13.6	*13.6	*4.5	*54.5	13.6	--	--	--	--	--	--	--	--	--	--	--	--	44
E	*86.6	*5.0	*0.3	*6.0	1	--	--	--	--	--	0.3	--	--	0.3	--	--	0.3	298
Helix 3	Base Pair (84:92)		BPC: cWW	AI: --	Strong
Frequency
Aln	GC	CG	UA	AU	GU	UG	AA	AC	AG	CA	CC	CU	GA	GG	UC	UU	gap	Seq
3	*24.5	7.5	*6.2	9.8	0.8	3.1	0.5	1	*14.6	0.2	--	*0.2	23.9	2	0.2	0.5	5.1	611
B	*43.0	*14.2	*10.3	*10.3	1.3	7.3	0.7	0.3	--	0.3	--	--	0.3	--	0.3	1	10.6	302
A	*68.2	*4.5	*6.8	*2.3	--	2.3	--	--	2.3	--	--	--	--	--	--	--	13.6	44
E	--	0.3	1.3	10.1	0.7	--	0.7	1.7	*29.9	--	--	*0.3	*51.0	4	--	--	--	298
Helix 3	Base Pair (85:91)		BPC: cWW	AI: --	Strong
Frequency
Aln	GC	CG	UA	AU	GU	UG	AA	AC	AG	CA	CC	CU	GA	GG	UC	UU	gap	Seq
3	*64.6	*17.8	*0.3	*2.1	2.9	2.3	--	1.3	--	0.2	--	--	--	--	0.8	0.2	7.4	611
B	*42.7	*27.5	*0.3	*1.7	3.6	3.3	--	2.6	--	0.3	--	--	--	--	1.3	0.3	16.2	302
A	*36.4	*25.0	--	*11.4	2.3	9.1	--	--	--	--	--	--	--	--	--	--	15.9	44
E	*88.9	*6.4	*0.7	*1.0	2	0.3	--	0.3	--	--	--	--	--	--	0.3	--	--	298
Helix 3	Base Pair (86:90)		BPC: cWW	AI: --	Strong
Frequency
Aln	GC	CG	UA	AU	GU	UG	AA	AC	AG	CA	CC	CU	GA	GG	UC	UU	gap	Seq
3	*65.6	*7.0	*0.2	*3.1	1	1.6	--	--	--	--	--	0.2	--	--	0.2	1	20.1	611
B	*44.0	*7.3	--	*0.7	2	1.3	--	--	--	--	--	0.3	--	--	0.3	0.7	43.4	302
A	*11.4	*40.9	2.3	6.8	--	13.6	--	--	--	--	--	--	--	--	--	*9.1	15.9	44
E	*94.0	*1.0	--	*5.0	--	--	--	--	--	--	--	--	--	--	--	--	--	298

## Sheet: 16S
Helix 1	Base Pair (9:25)		BPC: cWW	AI: --	Strong
Frequency
Aln	GC	CG	UA	AU	GU	UG	AA	AC	AG	CA	CC	CU	GA	GG	UC	UU	gap	Seq
T	56.7*	24.9*	0.2*	15.1*	0.9	0.1	0.1	1.1	0.1	--	0.2	--	--	0.1	0.1	--	0.5	3661
3	65.7*	31.5*	--	--	0.8	0.1	--	0.8	--	--	--	--	--	0.1	0.2	--	0.6	2878
B	97.2*	--	--	--	1.2	0.1*	--	1.2	--	--	--	--	--	0.1	0.3	--	0.1	1946
A	--	99.3	--	--	--	0.7	--	--	--	--	--	--	--	--	--	--	--	148
C	97.6	--	--	--	--	--	--	1.6	--	--	0.8	--	--	--	--	--	--	123
E	--	97.1*	0.1*	--	--	0.3	--	--	0.1	0.1	0.1	--	--	0.1	--	--	2	784
M	9.5*	0.5*	1.1*	83.8*	1.4	--	0.3	2.3	0.3	--	0.6	--	--	--	--	--	0.3	662
Collective Score
Aln	Xch	Ych	PE	PES	Cov1	Cov3	C1+C3	WC	WCGU	XCons	YCons	DfDel	PNuc	Seq
T	32	27	12	0.41	0.94	0.97	1.91	0.97	0.98	0.52	0.64	0	0.43	3661
3	16	9	3	0.24	0.94	0.98	1.92	0.98	0.99	0.93	1.03	0	0.4	2878
B	13	7	1	0.1	0.02	0	0.02	0.97	0.98	1.86	1.85	0	0.33	1946
A	0	0	0	0	0	0	0	0.99	1	1.94	2	0	0.56	148
C	2	0	0	0	0	0	0	0.98	0.98	1.81	2	0	0.68	123
E	3	2	2	0.8	0.14	0	0.14	0.99	0.99	1.73	1.95	0.02	0.73	784
M	14	18	9	0.56	0.69	0.95	1.65	0.95	0.96	1.3	1.28	0	0.57	662
Helix 1	Base Pair (10:24)		BPC: cWW	AI: --	Strong
Frequency
Aln	GC	CG	UA	AU	GU	UG	AA	AC	AG	CA	CC	CU	GA	GG	UC	UU	gap	Seq
T	14.6*	3.2*	20.7*	58.4*	1.9	--	--	0.2	0.1	0.1	--	0.4	--	--	--	0.2	0.3	3741
3	--	3.9*	26.1*	66.9*	1.9	--	--	--	0.1	0.1	--	0.5	--	--	--	0.1	0.3	2956
B	--	--	--	96.2	2.8	--	--	--	0.1	--	--	0.6	--	--	--	0.1	--	2016
A	--	73.5*	25.9*	--	--	0.7	--	--	--	--	--	--	--	--	--	--	--	147
C	--	--	--	100	--	--	--	--	--	--	--	--	--	--	--	--	--	124
E	--	0.8*	92.6*	5.0*	--	--	--	--	--	0.4	--	0.1	0.1	--	--	--	1	793
M	82.5*	0.8*	0.2*	12.5*	2.1	--	--	0.9	--	--	0.2	--	--	--	0.2	0.5	0.3	663
Collective Score
Aln	Xch	Ych	PE	PES	Cov1	Cov3	C1+C3	WC	WCGU	XCons	YCons	DfDel	PNuc	Seq
T	33	22	8	0.29	0.93	0.97	1.9	0.97	0.99	0.44	0.56	0	0.44	3741
3	20	12	5	0.31	0.92	0.97	1.89	0.97	0.99	0.76	0.96	0	0.41	2956
B	14	8	1	0.09	0.01	0	0.01	0.96	0.99	1.73	1.9	0	0.34	2016
A	3	2	2	0.8	0.97	0.99	1.97	0.99	1	1.17	1.21	0	0.56	147
C	0	0	0	0	0	0	0	1	1	2	2	0	0.68	124
E	3	2	2	0.8	0.9	0.99	1.9	0.99	0.99	1.5	1.63	0.01	0.74	793
M	13	10	3	0.26	0.78	0.96	1.74	0.96	0.98	1.26	1.26	0	0.57	663
Helix 1	Base Pair (11:23)		BPC: cWW	AI: --	Strong
Frequency
Aln	GC	CG	UA	AU	GU	UG	AA	AC	AG	CA	CC	CU	GA	GG	UC	UU	gap	Seq
T	93.8*	0.1*	0.4*	1.1*	0.1	--	--	4	--	--	0.1	--	--	--	0.1	--	0.3	3799
3	99.1*	--	--	0.1*	--	--	--	0.3	--	--	--	--	--	--	0.1	--	0.3	3010
B	99.1*	--	--	0.2*	--	--	--	0.4	--	--	--	--	--	--	--	--	0.1	2053
A	100	--	--	--	--	--	--	--	--	--	--	--	--	--	--	--	--	151
C	99.2	--	--	--	--	--	--	0.8	--	--	--	--	--	--	--	--	--	125
E	99	--	--	--	--	--	--	--	--	--	0.1	--	--	--	0.1	--	0.7	806
M	68.9*	0.5*	2.1*	5.4*	0.5	--	0.2	21.3	--	--	0.2	--	0.2	--	0.5	0.2	0.3	666
Collective Score
Aln	Xch	Ych	PE	PES	Cov1	Cov3	C1+C3	WC	WCGU	XCons	YCons	DfDel	PNuc	Seq
T	23	16	10	0.51	0.26	0.96	1.21	0.96	0.96	1.61	1.84	0	0.45	3799
3	7	4	1	0.18	0.23	1	1.23	1	1	1.91	1.95	0	0.42	3010
B	6	4	1	0.2	0.27	0.99	1.26	0.99	0.99	1.91	1.94	0	0.35	2053
A	0	0	0	0	0	0	0	1	1	2	2	0	0.57	151
C	1	0	0	0	0	0	0	0.99	0.99	1.93	2	0	0.69	125
E	1	0	0	0	0	0	0	1	1	1.89	1.99	0.01	0.76	806
M	15	12	9	0.67	0.26	0.77	1.03	0.77	0.78	0.91	1.45	0	0.57	666
Helix 1	Base Pair (12:22)		BPC: cWW	AI: --	Strong
Frequency
Aln	GC	CG	UA	AU	GU	UG	AA	AC	AG	CA	CC	CU	GA	GG	UC	UU	gap	Seq
T	23.1*	0.6	0.9	0.2*	--	68.2*	0.2	1	0.1	4.9*	0.1	--	--	0.2	0.1	0.2	0.4	3888
3	29.1*	0.3	0.1	0.2*	--	68.3*	--	1.3	0.1	--	0.1	--	--	0.2	0.1	0.1	0.3	3095
B	--	0.4	--	--	--	98.6	--	--	0.1	--	--	--	--	0.2	0.1	0.1	0.2	2131
A	90.6*	--	0.7	--	--	8.1*	--	--	--	--	--	--	--	0.7	--	--	--	149
C	--	--	--	--	--	99.2	--	--	--	--	--	--	--	0.8	--	--	--	126
E	93.9*	--	--	0.6*	0.1	--	--	4.8	--	--	0.1	--	--	--	--	--	0.4	815
M	--	1.9	5.1	--	--	62.0*	1	--	0.3	28.4*	--	0.1	--	0.1	--	0.6	0.3	669
Collective Score
Aln	Xch	Ych	PE	PES	Cov1	Cov3	C1+C3	WC	WCGU	XCons	YCons	DfDel	PNuc	Seq
T	35	31	9	0.27	0.89	0.97	1.86	0.25	0.93	0.79	0.88	0	0.46	3888
3	11	13	6	0.5	0.93	0.98	1.91	0.3	0.98	0.95	1.07	0	0.43	3095
B	6	6	1	0.17	0.08	0	0.08	0.01	0.99	1.88	1.91	0	0.36	2131
A	2	3	2	0.8	0.86	0.99	1.84	0.91	0.99	1.57	1.53	0	0.56	149
C	1	0	0	0	0	0	0	0	0.99	1.93	2	0	0.69	126
E	3	4	3	0.86	0.11	0	0.11	0.95	0.95	1.63	1.91	0	0.77	815
M	23	18	3	0.15	0.75	0.91	1.66	0.07	0.69	0.97	0.99	0	0.57	669
Helix 1	Base Pair (13:21)		BPC: No BP	AI: --	Weak
Frequency
Aln	GC	CG	UA	AU	GU	UG	AA	AC	AG	CA	CC	CU	GA	GG	UC	UU	gap	Seq
T	--	0.1	8.8	0.1	--	88.5*	0.1*	--	1.5	0.1	--	--	0.1	0.1	--	0.3	0.5	3890
3	--	0.1	0.2	--	--	99	--	--	0.1	--	--	--	--	0.1	--	0.1	0.4	3097
B	--	--	0.2	--	--	98.9	--	--	0.2	--	--	--	--	0.1	--	0.1	0.1	2128
A	--	--	--	--	--	100	--	--	--	--	--	--	--	--	--	--	--	154
C	--	--	0.8	--	--	94.4	--	--	--	--	--	--	--	--	--	4.8	--	126
E	--	0.1	0.1	--	--	98.9	--	--	--	--	--	--	--	--	--	--	0.8	815
M	--	--	50.2*	0.1	--	38.6	0.4	--	8.1*	0.7	--	--	0.4	0.1	--	0.6	0.6	669
Collective Score
Aln	Xch	Ych	PE	PES	Cov1	Cov3	C1+C3	WC	WCGU	XCons	YCons	DfDel	PNuc	Seq
T	14	68	3	0.07	0.02	0	0.02	0.09	0.98	1.8	1.5	0	0.46	3890
3	4	7	1	0.18	0.05	0	0.05	0	1	1.93	1.91	0	0.43	3097
B	4	6	1	0.2	0.05	0	0.05	0	0.99	1.94	1.89	0	0.36	2128
A	0	0	0	0	0	0	0	0	1	2	2	0	0.58	154
C	0	2	0	0	0	0	0	0.01	0.95	2	1.66	0	0.69	126
E	0	1	0	0	0	0	0	0	1	1.9	1.97	0.01	0.77	815
M	10	59	2	0.06	0.16	0	0.16	0.51	0.9	1.4	0.89	0	0.57	669
Helix 2	Base Pair (17:918)		BPC: cWW	AI: K	Strong
Frequency
Aln	GC	CG	UA	AU	GU	UG	AA	AC	AG	CA	CC	CU	GA	GG	UC	UU	gap	Seq
T	--	0.1*	98.3*	0.1*	--	0.4	0.1	--	--	0.1	--	--	0.1	--	0.2	0.2	0.4	3912
3	--	--	98.5	--	--	0.5	--	--	--	0.1	--	--	0.1	--	0.2	0.2	0.3	3123
B	--	--	99.1	--	--	0.1	--	--	--	--	--	--	0.1	--	--	0.2	0.2	2163
A	--	--	98.6	--	--	1.4	--	--	--	--	--	--	--	--	--	--	--	148
C	--	--	100	--	--	--	--	--	--	--	--	--	--	--	--	--	--	117
E	--	--	96.8*	0.1*	--	1.4	--	--	--	0.4	--	--	--	--	0.7	0.1	0.5	812
M	--	0.4*	97.3*	0.4*	--	0.1	0.3	--	--	0.1	--	--	0.1	0.1	0.3	0.3	0.3	672
Collective Score
Aln	Xch	Ych	PE	PES	Cov1	Cov3	C1+C3	WC	WCGU	XCons	YCons	DfDel	PNuc	Seq
T	13	16	7	0.48	0.15	0	0.15	0.99	0.99	1.92	1.9	0	0.46	3912
3	3	6	1	0.22	0.05	0	0.05	0.99	0.99	1.94	1.92	0	0.43	3123
B	1	3	0	0	0.07	0	0.07	0.99	0.99	1.95	1.96	0	0.37	2163
A	0	1	0	0	0	0	0	0.99	1	2	1.93	0	0.56	148
C	0	0	0	0	0	0	0	1	1	2	1.93	0.01	0.64	117
E	2	2	1	0.5	0.04	0	0.04	0.97	0.99	1.91	1.81	0	0.77	812
M	10	10	6	0.6	0.38	0.98	1.36	0.98	0.99	1.82	1.83	0	0.58	672
Helix 2	Base Pair (18:917)		BPC: cWW	AI: K	Strong
Frequency
Aln	GC	CG	UA	AU	GU	UG	AA	AC	AG	CA	CC	CU	GA	GG	UC	UU	gap	Seq
T	0.6*	92.5*	3.9*	--	--	0.6	--	--	0.3	1.7	--	0.1	0.1	--	--	--	0.2	3930
3	--	92.8*	3.9*	--	--	0.7	--	--	0.2	2.1	--	0.1	--	--	--	--	0.2	3137
B	--	95.2*	3.0*	--	--	0.7	--	--	0.2	0.5	--	0.1	--	--	--	--	0.1	2163
A	--	99.3	--	--	--	0.7	--	--	--	--	--	--	--	--	--	--	--	149
C	--	99.2	--	--	--	--	--	--	0.8	--	--	--	--	--	--	--	--	118
E	--	85.5*	7.2*	--	--	0.6	--	--	--	6.5	--	--	--	--	--	--	0.2	825
M	3.4*	90.1*	4.7*	0.1*	--	0.1	0.1	--	0.6	0.1	--	--	0.1	--	--	0.1	0.3	675
Collective Score
Aln	Xch	Ych	PE	PES	Cov1	Cov3	C1+C3	WC	WCGU	XCons	YCons	DfDel	PNuc	Seq
T	44	41	21	0.49	0.62	0.97	1.6	0.97	0.98	1.62	1.59	0	0.46	3930
3	27	23	11	0.44	0.56	0.97	1.53	0.97	0.98	1.68	1.66	0	0.44	3137
B	24	18	10	0.48	0.64	0.98	1.62	0.98	0.99	1.7	1.75	0	0.37	2163
A	1	0	0	0	0	0	0	0.99	1	1.94	1.96	0	0.56	149
C	1	1	0	0	0	0	0	0.99	0.99	1.94	1.93	0.01	0.65	118
E	2	5	1	0.29	0.5	0.93	1.43	0.93	0.93	1.58	1.34	0	0.78	825
M	16	17	10	0.61	0.86	0.99	1.85	0.99	0.99	1.39	1.35	0	0.58	675
Helix 2	Base Pair (19:916)		BPC: cWW	AI: K	Strong
Frequency
Aln	GC	CG	UA	AU	GU	UG	AA	AC	AG	CA	CC	CU	GA	GG	UC	UU	gap	Seq
T	0.1*	86.3*	1.4*	8.0*	--	0.2	0.1	--	1.3	0.4	0.1	1.8	--	0.1	--	--	0.4	3959
3	--	85.3*	0.9*	9.6*	--	0.3	--	--	1.2	0.3	0.1	2.2	--	0.1	--	--	0.2	3166
B	--	79.9*	0.3*	13.9*	--	0.4	--	--	1.7	0.2	0.1	3.2	--	0.1	--	--	0.2	2190
A	--	100	--	--	--	--	--	--	--	--	--	--	--	--	--	--	--	150
C	--	91.5	--	--	--	--	--	--	8.5	--	--	--	--	--	--	--	--	117
E	--	97.0*	2.4*	--	--	--	--	--	--	0.5	--	--	--	--	--	--	0.1	826
M	0.4*	90.7*	4.4*	1.9*	--	0.1	0.3	--	0.4	0.9	--	0.1	--	0.3	--	--	0.3	676
Collective Score
Aln	Xch	Ych	PE	PES	Cov1	Cov3	C1+C3	WC	WCGU	XCons	YCons	DfDel	PNuc	Seq
T	49	31	7	0.17	0.71	0.96	1.67	0.96	0.96	1.38	1.41	0	0.46	3959
3	32	16	1	0.04	0.72	0.96	1.68	0.96	0.96	1.39	1.41	0	0.44	3166
B	32	13	1	0.04	0.72	0.94	1.66	0.94	0.95	1.29	1.34	0	0.37	2190
A	0	0	0	0	0	0	0	1	1	2	1.96	0	0.57	150
C	5	2	1	0.29	0	0	0	0.92	0.92	1.4	1.93	0	0.64	117
E	0	3	0	0	0.83	0.99	1.83	0.99	0.99	1.82	1.79	0	0.78	826
M	12	13	5	0.4	0.75	0.98	1.73	0.98	0.98	1.46	1.52	0	0.58	676
Helix 3	Base Pair (27:556)		BPC: cWW	AI: --	Strong
Frequency
Aln	GC	CG	UA	AU	GU	UG	AA	AC	AG	CA	CC	CU	GA	GG	UC	UU	gap	Seq
T	71.0*	3.4*	2.3*	18.6*	0.3	0.1	2	0.8	0.2	--	0.2	0.1	--	--	0.1	0.5	0.4	4476
3	78.8*	2.4*	0.1*	17.2*	0.1	--	0.1	0.3	--	--	0.1	--	--	--	0.1	0.4	0.2	3638
B	99.3	--	--	--	--	--	--	0.2	--	--	0.1	--	--	--	0.1	--	0.2	2600
A	63.9*	29.7*	--	1.3*	--	--	--	3.2	--	--	1.3	--	--	--	--	--	0.6	155
C	97.7*	--	--	1.5*	0.8	--	--	--	--	--	--	--	--	--	--	--	--	132
E	21.0*	4.9*	0.2*	70.8*	0.5	--	0.6	0.1	--	--	--	0.1	--	--	--	1.8	0.1	883
M	26.1*	9.0*	14.5*	29.0*	0.8	0.4	12.1	3.2	1.3	0.1	0.3	0.3	0.1	0.1	0.1	0.8	1.4	708
Collective Score
Aln	Xch	Ych	PE	PES	Cov1	Cov3	C1+C3	WC	WCGU	XCons	YCons	DfDel	PNuc	Seq
T	50	80	26	0.4	0.85	0.96	1.81	0.96	0.96	0.83	0.96	0	0.52	4476
3	16	13	8	0.55	0.94	0.99	1.93	0.99	0.99	1.09	1.28	0	0.51	3638
B	3	1	1	0.5	0	0	0	0.99	0.99	1.92	1.98	0	0.44	2600
A	5	3	2	0.5	0.87	0.95	1.83	0.95	0.95	0.84	1	0	0.58	155
C	0	1	0	0	0.67	0.99	1.66	0.99	1	1.89	1.87	0	0.72	132
E	8	9	5	0.59	0.9	0.97	1.86	0.97	0.97	0.83	0.98	0	0.84	883
M	34	66	18	0.36	0.71	0.8	1.51	0.8	0.81	0.2	0.04	0.01	0.6	708
Helix 3	Base Pair (28:555)		BPC: cWW	AI: --	Strong
Frequency
Aln	GC	CG	UA	AU	GU	UG	AA	AC	AG	CA	CC	CU	GA	GG	UC	UU	gap	Seq
T	40.4*	7.5*	2.1*	32.1*	14.2	0.5	0.1	1.2	--	0.4	0.1	0.5	--	--	0.1	0.4	0.2	4977
3	45.4*	1.4*	--	35.5*	16.8	--	--	0.1	--	--	0.1	0.2	--	--	--	0.1	0.2	4137
B	51.4*	0.2*	--	46.9*	1	--	--	0.1	--	--	0.1	--	--	--	--	--	0.1	3080
A	56.5*	28.0*	--	1.2*	11.3	--	--	--	--	--	1.2	--	--	--	--	--	1.8	168
C	94.0*	--	--	3.8*	1.5	--	--	0.8	--	--	--	--	--	--	--	--	--	133
E	22.4	0.4*	0.1*	2.5	72.6*	0.1	--	0.1*	--	--	--	0.9	0.1	--	--	0.6	0.2	889
M	1.6*	44.3*	14.5*	17.5*	1	3.5	0.8	7.9	--	3.1	0.1	2.1	0.1	--	0.4	2.7	0.3	709
Collective Score
Aln	Xch	Ych	PE	PES	Cov1	Cov3	C1+C3	WC	WCGU	XCons	YCons	DfDel	PNuc	Seq
T	69	103	33	0.38	0.7	0.82	1.53	0.82	0.97	0.51	0.55	0	0.58	4977
3	25	29	8	0.3	0.68	0.82	1.5	0.82	0.99	0.89	0.9	0	0.57	4137
B	12	12	5	0.42	0.97	0.99	1.96	0.99	1	0.95	0.97	0	0.53	3080
A	4	5	2	0.44	0.7	0.87	1.57	0.87	0.99	0.9	0.61	0.01	0.62	168
C	5	6	2	0.36	0.62	0.98	1.6	0.98	0.99	1.68	1.61	0	0.73	133
E	9	12	1	0.1	0.03	0	0.03	0.26	0.98	1.63	1.19	0	0.84	889
M	39	68	23	0.43	0.61	0.78	1.39	0.78	0.83	0.36	0.21	0	0.61	709
Helix 3	Base Pair (29:554)		BPC: cWW	AI: --	Strong
Frequency
Aln	GC	CG	UA	AU	GU	UG	AA	AC	AG	CA	CC	CU	GA	GG	UC	UU	gap	Seq
T	7.5*	2.4*	36.6*	46.9*	0.5	1.1	0.2	1.1	--	0.4	0.4	0.7	0.1	0.1	0.2	0.6	1.1	5079
3	7.7*	2.4*	36.3*	51.0*	0.2	0.5	--	0.1	--	--	--	0.1	--	0.1	--	0.3	1.2	4239
B	10.0*	--	21.2*	67.7*	0.3	--	--	0.1	--	--	--	0.2	0.1	--	--	0.3	--	3182
A	1.1*	56.5*	26.0*	1.7*	--	10.2	--	--	--	--	--	--	--	2.8	--	--	1.7	177
C	1.5*	--	--	93.3*	3.7	--	--	--	--	--	--	--	--	--	--	1.5	--	134
E	0.5*	--	92.7*	0.2*	0.2	0.6	--	--	--	0.1	0.1	--	--	--	--	0.2	5.3	880
M	7.8*	3.4*	45.9*	13.6*	1.4	4.9	1	7.8	0.1	2.3	2.8	4.2	0.3	--	1.4	2.7	0.4	708
Collective Score
Aln	Xch	Ych	PE	PES	Cov1	Cov3	C1+C3	WC	WCGU	XCons	YCons	DfDel	PNuc	Seq
T	103	125	48	0.42	0.9	0.94	1.84	0.94	0.96	0.39	0.48	0.01	0.59	5079
3	43	48	27	0.59	0.97	0.98	1.95	0.98	0.99	0.43	0.55	0.01	0.58	4239
B	28	31	19	0.64	0.97	0.99	1.96	0.99	0.99	0.76	0.79	0	0.54	3182
A	13	11	6	0.5	0.69	0.87	1.56	0.87	0.97	0.62	1.06	0.01	0.66	177
C	3	1	1	0.5	0.22	0.95	1.17	0.95	0.98	1.61	1.91	0	0.74	134
E	2	6	2	0.5	0.35	0.99	1.34	0.99	0.99	1.5	1.82	0.04	0.79	880
M	57	76	20	0.3	0.46	0.71	1.17	0.71	0.77	0.32	0.25	0	0.61	708
Helix 3	Base Pair (30:553)		BPC: cWW	AI: --	Strong
Frequency
Aln	GC	CG	UA	AU	GU	UG	AA	AC	AG	CA	CC	CU	GA	GG	UC	UU	gap	Seq
T	7.3*	33.6*	34.0*	22.1*	0.6	1.2	0.2	0.2	--	0.2	--	0.1	0.2	0.1	--	0.1	0.2	5157
3	1.4*	40.1*	35.8*	20.0*	0.3	1.4	0.2	--	--	0.2	--	0.1	0.1	--	--	--	0.1	4314
B	0.1*	50.4*	47.0*	--	--	1.6	0.1	--	0.1	0.3	--	0.1	0.1	--	--	0.1	--	3238
A	28.1*	50.6*	14.0*	1.1*	--	5.6	--	--	--	--	--	--	0.6	--	--	--	--	178
C	--	2.2*	92.5*	1.5*	--	0.7	--	--	--	--	--	--	3	--	--	--	--	134
E	0.7*	0.7*	--	95.8*	1.7	--	0.4	0.1	--	--	--	--	--	0.1	--	--	0.6	898
M	44.6*	0.3*	11.5*	39.2*	2.1	0.1	0.1	1	--	0.3	--	0.1	--	0.1	--	0.1	0.3	711
Collective Score
Aln	Xch	Ych	PE	PES	Cov1	Cov3	C1+C3	WC	WCGU	XCons	YCons	DfDel	PNuc	Seq
T	98	108	65	0.63	0.96	0.97	1.93	0.97	0.99	0.14	0.21	0	0.6	5157
3	55	60	37	0.64	0.96	0.97	1.93	0.97	0.99	0.35	0.41	0	0.6	4314
B	41	47	27	0.61	0.95	0.98	1.93	0.98	0.99	0.94	0.96	0	0.55	3238
A	8	8	6	0.75	0.88	0.94	1.81	0.94	0.99	0.45	0.48	0	0.67	178
C	4	3	1	0.29	0.5	0.96	1.46	0.96	0.97	1.49	1.68	0	0.74	134
E	6	5	4	0.73	0.36	0.98	1.34	0.98	0.99	1.72	1.85	0.01	0.85	898
M	39	45	27	0.64	0.93	0.96	1.89	0.96	0.98	0.52	0.58	0	0.61	711
Helix 3	Base Pair (32:552)		BPC: cWW	AI: --	Strong
Frequency
Aln	GC	CG	UA	AU	GU	UG	AA	AC	AG	CA	CC	CU	GA	GG	UC	UU	gap	Seq
T	0.5*	0.2*	27.4*	70.3*	0.2	--	0.1	--	0.1	0.1	--	0.1	--	0.5	--	0.2	0.4	5253
3	0.6*	--	19.1*	78.7*	0.3	--	0.1	--	--	--	--	0.1	--	0.5	--	0.2	0.3	4408
B	--	--	0.2*	98.8*	0.4	--	0.1	0.1	--	--	--	0.1	--	--	--	0.2	0.1	3333
A	1.1*	--	--	98.3*	--	--	--	--	--	--	--	0.6	--	--	--	--	--	178
C	--	--	--	100	--	--	--	--	--	--	--	--	--	--	--	--	--	135
E	2.6	0.1	93.1*	--	--	--	0.1	--	--	0.1	--	0.1*	--	2.7*	0.1	0.1	1	897
M	--	1.1*	84.3*	12.5*	0.1	--	0.3	--	0.3	0.3	--	--	0.1	--	0.1	0.4	0.4	712
Collective Score
Aln	Xch	Ych	PE	PES	Cov1	Cov3	C1+C3	WC	WCGU	XCons	YCons	DfDel	PNuc	Seq
T	23	28	12	0.47	0.95	0.99	1.94	0.99	0.99	1	1.09	0	0.61	5253
3	13	14	5	0.37	0.94	0.99	1.92	0.99	0.99	1.15	1.25	0	0.61	4408
B	6	7	1	0.15	0.14	0	0.14	0.99	0.99	1.89	1.92	0	0.57	3333
A	1	1	1	1	0.67	0.99	1.66	0.99	0.99	1.87	1.93	0	0.67	178
C	0	0	0	0	0	0	0	1	1	2	2	0	0.74	135
E	6	6	3	0.5	0.47	0.97	1.44	0.97	0.97	1.56	1.61	0.01	0.84	897
M	10	14	7	0.58	0.89	0.98	1.87	0.98	0.98	1.27	1.33	0	0.61	712
Helix 3	Base Pair (33:551)		BPC: cWW	AI: --	Strong
Frequency
Aln	GC	CG	UA	AU	GU	UG	AA	AC	AG	CA	CC	CU	GA	GG	UC	UU	gap	Seq
T	0.1*	5.5*	9.3*	84.1*	0.4	--	--	--	--	--	--	--	--	--	--	0.1	0.5	5282
3	--	3.0*	1.1*	95.2*	0.2	--	--	--	--	--	--	--	--	--	--	--	0.2	4439
B	--	--	--	99.6	0.2	--	--	--	--	--	--	--	--	--	--	--	--	3361
A	--	71.6*	27.3*	--	--	--	--	--	--	0.5	--	--	--	--	--	--	0.5	183
C	--	--	1.5*	97.8*	--	--	--	--	--	--	--	0.7	--	--	--	--	--	135
E	0.2*	--	--	98.3*	0.1	--	--	0.1	0.1	--	--	--	--	--	--	--	1.1	895
M	0.4*	22.2*	62.2*	11.5*	1.4	--	0.3	--	--	0.1	--	--	0.1	--	--	0.3	1.3	712
Collective Score
Aln	Xch	Ych	PE	PES	Cov1	Cov3	C1+C3	WC	WCGU	XCons	YCons	DfDel	PNuc	Seq
T	20	22	11	0.52	0.96	0.99	1.96	0.99	1	1.17	1.25	0	0.62	5282
3	11	10	5	0.48	0.92	1	1.92	1	1	1.65	1.72	0	0.62	4439
B	4	1	0	0	0	0	0	1	1	1.96	1.97	0	0.57	3361
A	5	6	3	0.55	0.98	0.99	1.98	0.99	0.99	1.16	1.17	0	0.69	183
C	1	0	0	0	0.67	0.99	1.66	0.99	0.99	1.83	1.91	0	0.74	135
E	2	3	2	0.8	0.4	1	1.4	1	1	1.87	1.94	0.01	0.84	895
M	8	12	6	0.6	0.94	0.98	1.92	0.98	0.99	0.55	0.62	0	0.6	712
Helix 3	Base Pair (34:550)		BPC: cWW	AI: --	Strong
Frequency
Aln	GC	CG	UA	AU	GU	UG	AA	AC	AG	CA	CC	CU	GA	GG	UC	UU	gap	Seq
T	0.9*	69.8*	0.9*	9.4*	0.4	17	--	0.3	0.2	--	0.1	0.1	--	0.3	--	0.1	0.3	5366
3	--	78.2*	0.6*	--	--	20	--	--	0.2	--	0.1	0.1	--	0.4	--	--	0.3	4520
B	--	98.6*	0.3*	--	--	0.1	--	--	0.3	--	0.1	0.1	--	0.3	--	--	0.2	3444
A	--	29	--	--	--	71	--	--	--	--	--	--	--	--	--	--	--	183
C	--	98.5	--	--	--	0.7	--	--	--	0.7	--	--	--	--	--	--	--	136
E	--	9.6	1.8	0.2	0.1	86.5*	--	--	--	--	--	0.2*	--	0.7	--	--	0.9	893
M	6.7*	11.3*	2.9*	71.0*	3.2	0.6	0.3	2.4	--	--	--	0.1	0.1	--	--	0.7	0.6	714
Collective Score
Aln	Xch	Ych	PE	PES	Cov1	Cov3	C1+C3	WC	WCGU	XCons	YCons	DfDel	PNuc	Seq
T	68	55	28	0.46	0.38	0.81	1.19	0.81	0.99	0.74	1.37	0	0.63	5366
3	22	12	5	0.29	0.03	0	0.03	0.79	0.99	1.18	1.9	0	0.63	4520
B	8	8	3	0.38	0.29	0.99	1.28	0.99	0.99	1.89	1.92	0	0.59	3444
A	4	0	0	0	0	0	0	0.29	1	1.13	2	0	0.69	183
C	1	1	0	0	0	0	0	0.98	0.99	1.94	1.95	0	0.75	136
E	10	4	2	0.29	0.02	0	0.02	0.12	0.99	1.36	1.78	0.01	0.84	893
M	45	42	23	0.53	0.74	0.93	1.66	0.93	0.96	0.76	0.91	0	0.61	714
Helix 3	Base Pair (35:549)		BPC: cWW	AI: --	Weak
Frequency
Aln	GC	CG	UA	AU	GU	UG	AA	AC	AG	CA	CC	CU	GA	GG	UC	UU	gap	Seq
T	82.3*	0.1*	0.3*	4.1*	10.8	--	--	1.2	--	0.1	0.3	--	0.1	--	0.2	0.1	0.3	5420
3	93.4*	0.1*	--	--	5.3	--	--	0.2	--	--	0.3	--	0.1	--	0.2	--	0.4	4555
B	98.8*	0.1*	--	--	0.1	--	--	0.2	--	--	0.4	--	--	--	0.1	--	0.2	3467
A	3.8	1.1*	--	--	94.0*	--	--	--	--	--	--	0.5	--	--	--	--	0.5	184
C	86.8	--	--	--	13.2	--	--	--	--	--	--	--	--	--	--	--	--	136
E	90.8*	--	--	0.1	7.1	--	--	--	--	--	0.1	--	0.2	--	0.3	0.2*	1.1	904
M	12.1	0.4*	1.8*	31	44.2*	--	0.3	8.2*	--	0.4	0.1	--	--	0.1	0.5	0.5	0.3	733
Collective Score
Aln	Xch	Ych	PE	PES	Cov1	Cov3	C1+C3	WC	WCGU	XCons	YCons	DfDel	PNuc	Seq
T	75	71	20	0.27	0.26	0.87	1.13	0.87	0.98	1.57	1.35	0	0.63	5420
3	14	10	4	0.33	0.03	0	0.03	0.94	0.99	1.89	1.68	0	0.63	4555
B	10	2	2	0.33	0.11	0	0.11	0.99	0.99	1.91	1.94	0	0.59	3467
A	2	3	1	0.4	0.2	0	0.2	0.05	0.99	1.89	1.65	0	0.69	184
C	0	6	0	0	0	0	0	0.87	1	2	1.43	0	0.75	136
E	2	5	1	0.29	0.03	0	0.03	0.92	0.99	1.84	1.58	0.01	0.85	904
M	61	55	16	0.28	0.19	0	0.19	0.45	0.9	0.77	1.11	0	0.63	733
Helix 3	Base Pair (36:548)		BPC: cWW	AI: --	Strong
Frequency
Aln	GC	CG	UA	AU	GU	UG	AA	AC	AG	CA	CC	CU	GA	GG	UC	UU	gap	Seq
T	--	88.7*	9.2*	--	--	0.7	0.1	--	0.1	0.3	0.1	0.1	--	0.2	--	--	0.4	5516
3	--	96.8*	1.8*	--	--	0.2	--	--	0.1	0.2	0.2	0.1	--	0.2	--	--	0.4	4632
B	--	96.2*	2.4*	--	--	0.2	--	--	0.1	0.2	0.1	0.1	--	0.3	--	--	0.3	3539
A	--	99.5	--	--	--	--	--	--	--	--	--	--	--	--	--	--	0.5	184
C	--	99.3	--	--	--	--	--	--	--	--	--	--	--	0.7	--	--	--	152
E	--	98.3	--	--	--	0.1	--	--	--	0.1	0.2	--	--	--	--	--	1.2	909
M	--	35.6*	57.1*	0.4*	0.1	4.6	0.4	0.1	0.1	1	--	--	--	--	0.1	0.1	0.3	736
Collective Score
Aln	Xch	Ych	PE	PES	Cov1	Cov3	C1+C3	WC	WCGU	XCons	YCons	DfDel	PNuc	Seq
T	55	59	30	0.53	0.85	0.98	1.83	0.98	0.99	1.45	1.52	0	0.65	5516
3	13	15	6	0.43	0.67	0.99	1.66	0.99	0.99	1.78	1.82	0	0.64	4632
B	13	14	6	0.44	0.69	0.99	1.68	0.99	0.99	1.75	1.79	0	0.6	3539
A	0	0	0	0	0	0	0	1	1	2	1.95	0	0.69	184
C	1	0	0	0	0	0	0	0.99	0.99	1.95	2	0	0.83	152
E	0	1	0	0	0	0	0	1	1	1.89	1.95	0.01	0.85	909
M	41	44	24	0.56	0.84	0.93	1.78	0.93	0.98	0.94	0.91	0	0.63	736
Helix 3	Base Pair (37:547)		BPC: tWS	AI: --	Weak
Frequency
Aln	GC	CG	UA	AU	GU	UG	AA	AC	AG	CA	CC	CU	GA	GG	UC	UU	gap	Seq
T	--	--	97.5*	0.1*	--	0.7	0.2	--	--	0.9	--	--	0.2	--	0.1	0.1	0.3	5551
3	--	--	98.6	--	--	0.7	0.1	--	--	0.2	--	--	0.1	--	--	0.1	0.2	4665
B	--	--	98.7	--	--	0.7	0.1	--	--	0.2	--	--	0.1	--	--	0.1	0.1	3570
A	--	--	100	--	--	--	--	--	--	--	--	--	--	--	--	--	--	183
C	--	--	96.7	--	--	--	1.3	--	--	0.7	--	--	0.7	--	--	--	0.7	152
E	--	--	98	--	--	0.8	--	--	--	0.1	--	--	--	--	0.1	0.1	0.9	912
M	0.1*	0.1*	90.8*	0.5*	--	0.5	0.5	--	0.3	5.3	--	0.1	0.5	--	0.1	0.4	0.5	738
Collective Score
Aln	Xch	Ych	PE	PES	Cov1	Cov3	C1+C3	WC	WCGU	XCons	YCons	DfDel	PNuc	Seq
T	34	24	5	0.17	0.06	0	0.06	0.98	0.99	1.85	1.89	0	0.65	5551
3	4	9	0	0	0.02	0	0.02	0.99	1	1.93	1.92	0	0.65	4665
B	4	5	0	0	0.02	0	0.02	0.99	0.99	1.94	1.91	0	0.61	3570
A	0	0	0	0	0	0	0	1	1	2	2	0	0.69	183
C	3	0	0	0	0	0	0	0.97	0.97	1.79	1.94	0.01	0.83	152
E	0	4	0	0	0	0	0	0.99	1	1.9	1.91	0.01	0.86	912
M	27	15	5	0.24	0.09	0	0.09	0.92	0.93	1.48	1.78	0	0.63	738
Helix 4	Base Pair (39:403)		BPC: cWW	AI: --	Weak
Frequency
Aln	GC	CG	UA	AU	GU	UG	AA	AC	AG	CA	CC	CU	GA	GG	UC	UU	gap	Seq
T	67.3*	0.2*	13.1*	1.2*	1	0.2	0.3	0.3	--	0.6	0.3	0.1	14.2	0.1	0.3	0.6	0.5	5839
3	75.2*	--	5.4*	0.4*	1.1	--	0.1	0.2	--	--	0.2	--	16.7	0.1	0.3	--	0.3	4942
B	96.4*	--	1.0*	0.5*	1	--	--	0.2	--	--	0.2	--	0.1	0.1	0.3	--	0.1	3830
A	--	--	99	--	--	1	--	--	--	--	--	--	--	--	--	--	--	193
C	98.1*	--	--	0.6*	0.6	--	--	--	--	--	--	--	--	--	0.6	--	--	154
E	2.4	--	4	--	1.5	--	0.8	0.4*	--	0.1	0.1	--	89.7*	--	--	--	1	919
M	8.0*	1.3*	67.2*	6.3*	0.8	1.1	1.1	0.4	0.1	4.6	0.8	0.8	0.1	0.1	0.7	5.5	1.1	747
Collective Score
Aln	Xch	Ych	PE	PES	Cov1	Cov3	C1+C3	WC	WCGU	XCons	YCons	DfDel	PNuc	Seq
T	95	98	28	0.29	0.45	0.82	1.27	0.82	0.83	1.17	0.93	0	0.68	5839
3	24	35	6	0.2	0.24	0.81	1.05	0.81	0.82	1.57	1.12	0	0.69	4942
B	18	24	5	0.24	0.44	0.98	1.42	0.98	0.99	1.8	1.75	0	0.65	3830
A	0	1	0	0	0	0	0	0.99	1	2	1.93	0	0.73	193
C	1	3	1	0.5	0.33	0.99	1.32	0.99	0.99	1.89	1.81	0	0.85	154
E	6	10	1	0.12	0.05	0	0.05	0.07	0.08	1.54	1.69	0.01	0.86	919
M	70	60	21	0.32	0.49	0.84	1.33	0.84	0.86	0.76	0.62	0	0.64	747
Helix 4	Base Pair (40:402)		BPC: cWW	AI: --	Strong
Frequency
Aln	GC	CG	UA	AU	GU	UG	AA	AC	AG	CA	CC	CU	GA	GG	UC	UU	gap	Seq
T	0.5*	71.5*	23.1*	2.9*	0.1	0.4	0.3	0.1	0.2	0.3	0.1	0.1	0.1	0.1	0.1	0.1	0.2	5927
3	0.4*	79.3*	18.9*	0.2*	--	0.3	--	--	0.1	0.1	0.1	--	0.1	0.1	0.1	--	0.2	5027
B	--	98.5*	0.7*	--	--	0.2	--	--	0.2	--	0.1	--	--	0.2	--	--	--	3915
A	8.7*	62.1*	25.1*	2.6*	--	1	--	--	--	--	--	--	--	--	--	--	0.5	195
C	--	96.1*	1.3*	0.6*	--	--	1.3	--	0.6	--	--	--	--	--	--	--	--	155
E	0.2*	0.9*	95.3*	0.4*	--	0.7	0.1	--	--	0.2	--	0.1	0.7	--	0.4	0.1	0.9	917
M	1.3*	13.6*	56.3*	21.1*	0.4	1.1	2.3	0.5	0.3	1.6	--	0.1	0.1	--	--	0.9	0.3	749
Collective Score
Aln	Xch	Ych	PE	PES	Cov1	Cov3	C1+C3	WC	WCGU	XCons	YCons	DfDel	PNuc	Seq
T	87	84	53	0.62	0.94	0.98	1.92	0.98	0.99	0.93	0.99	0	0.69	5927
3	30	26	20	0.71	0.95	0.99	1.94	0.99	0.99	1.19	1.24	0	0.7	5027
B	12	6	4	0.44	0.5	0.99	1.49	0.99	0.99	1.89	1.88	0	0.67	3915
A	10	11	10	0.95	0.97	0.99	1.96	0.99	1	0.61	0.56	0	0.73	195
C	3	5	2	0.5	0.33	0.97	1.31	0.98	0.98	1.73	1.74	0	0.85	155
E	8	9	6	0.71	0.4	0.98	1.38	0.98	0.98	1.7	1.75	0.01	0.86	917
M	54	53	31	0.58	0.83	0.93	1.76	0.93	0.94	0.5	0.51	0	0.64	749
Helix 4	Base Pair (41:401)		BPC: cWW	AI: --	Strong
Frequency
Aln	GC	CG	UA	AU	GU	UG	AA	AC	AG	CA	CC	CU	GA	GG	UC	UU	gap	Seq
T	71.2*	7.2*	2.3*	9.0*	0.4	0.6	0.2	0.2	--	3.5	0.1	4.6	0.1	0.1	0.3	--	0.3	5909
3	77.2*	7.6*	1.9*	2.0*	0.3	0.6	--	0.1	--	4.1	0.1	5.5	--	--	0.1	--	0.2	5009
B	94.6*	--	2.3*	2.1*	0.3	--	--	0.1	--	--	0.1	--	--	0.1	0.1	--	0.3	3896
A	90.7*	1.6*	--	7.3*	0.5	--	--	--	--	--	--	--	--	--	--	--	--	193
C	92.9*	--	--	4.5*	0.6	--	--	0.6	--	--	--	--	--	--	1.3	--	--	154
E	0.9*	41.2*	0.7*	0.4*	0.1	3.2	0.2	--	--	22.5	--	29.7	0.1	--	--	--	1.1	920
M	26.0*	5.9*	5.9*	56.4*	1.3	0.5	1.1	0.4	0.1	0.1	--	--	0.3	0.1	1.3	0.3	0.3	750
Collective Score
Aln	Xch	Ych	PE	PES	Cov1	Cov3	C1+C3	WC	WCGU	XCons	YCons	DfDel	PNuc	Seq
T	83	97	58	0.64	0.65	0.9	1.55	0.9	0.91	0.74	0.77	0	0.69	5909
3	30	44	19	0.51	0.52	0.89	1.41	0.89	0.9	1	0.93	0	0.69	5009
B	16	18	12	0.71	0.86	0.99	1.85	0.99	1	1.65	1.66	0	0.66	3896
A	5	5	5	1	0.94	0.99	1.94	0.99	1	1.52	1.54	0	0.73	193
C	5	5	4	0.8	0.64	0.97	1.61	0.97	0.98	1.61	1.67	0	0.85	154
E	9	21	2	0.13	0.03	0	0.03	0.44	0.47	1.53	0.37	0.01	0.86	920
M	48	48	35	0.73	0.87	0.94	1.81	0.94	0.96	0.47	0.45	0	0.65	750
Helix 4	Base Pair (42:400)		BPC: cWW	AI: --	Strong
Frequency
Aln	GC	CG	UA	AU	GU	UG	AA	AC	AG	CA	CC	CU	GA	GG	UC	UU	gap	Seq
T	72.2*	5.8*	16.4*	4.1*	0.4	0.3	--	0.1	--	0.1	0.2	--	--	--	0.1	--	0.4	5987
3	79.1*	0.4*	17.5*	1.9*	0.3	0.1	--	0.1	--	0.1	0.2	--	--	--	0.1	--	0.4	5078
B	96.7*	--	--	2.4*	0.3	--	--	0.1	--	--	0.2	--	--	--	0.1	--	0.3	3959
A	94.9*	--	--	2.0*	2.5	--	--	--	--	--	--	--	--	--	--	--	0.5	197
C	94.8*	--	--	3.2*	0.6	--	--	0.6	--	--	--	--	--	--	--	0.6	--	155
E	--	2.3*	96.3*	--	--	0.4	--	--	--	0.3	--	--	--	--	--	--	0.7	922
M	21.4*	43.1*	12.5*	19.1*	1.1	1.5	0.1	--	--	0.1	0.1	0.1	0.3	--	--	--	0.5	758
Collective Score
Aln	Xch	Ych	PE	PES	Cov1	Cov3	C1+C3	WC	WCGU	XCons	YCons	DfDel	PNuc	Seq
T	62	67	42	0.65	0.96	0.99	1.95	0.99	0.99	0.77	0.84	0	0.7	5987
3	22	21	10	0.47	0.96	0.99	1.96	0.99	1	1.11	1.17	0	0.7	5078
B	15	12	6	0.44	0.78	0.99	1.77	0.99	1	1.78	1.82	0	0.67	3959
A	2	3	1	0.4	0.44	0.97	1.42	0.97	1	1.86	1.58	0	0.74	197
C	3	4	2	0.57	0.62	0.98	1.61	0.98	0.99	1.71	1.7	0	0.85	155
E	5	6	3	0.55	0.75	0.99	1.74	0.99	1	1.76	1.81	0.01	0.87	922
M	37	42	30	0.76	0.94	0.97	1.91	0.97	0.99	0.1	0.1	0	0.65	758
Helix 4	Base Pair (43:399)		BPC: cWW	AI: --	Strong
Frequency
Aln	GC	CG	UA	AU	GU	UG	AA	AC	AG	CA	CC	CU	GA	GG	UC	UU	gap	Seq
T	3.1*	65.4*	15.0*	2.4*	0.1	1.3	0.6	--	0.1	10.7	0.5	0.1	--	0.2	0.1	0.2	0.4	5974
3	3.3*	72.2*	7.3*	1.8*	--	1.1	0.6	--	0.1	12.4	0.5	0.1	--	0.2	--	0.1	0.3	5063
B	0.8*	88.1*	7.1*	1.2*	--	0.9	--	--	0.1	0.4	0.6	0.2	--	0.3	0.1	--	0.2	3943
A	69.7*	--	10.1*	20.2*	--	--	--	--	--	--	--	--	--	--	--	--	--	198
C	--	58.3*	39.1*	0.6*	--	0.6	--	--	--	0.6	--	--	--	0.6	--	--	--	156
E	--	19.4	7.4	0.1*	--	2.2*	3.4	--	--	66.4*	0.1	--	--	--	--	0.4	0.6	922
M	2.1*	21.5*	61.8*	7.5*	0.5	2.9	0.4	0.3	--	1.1	0.1	--	0.3	--	0.3	0.9	0.4	759
Collective Score
Aln	Xch	Ych	PE	PES	Cov1	Cov3	C1+C3	WC	WCGU	XCons	YCons	DfDel	PNuc	Seq
T	135	146	92	0.66	0.6	0.86	1.46	0.86	0.88	0.94	0.81	0	0.7	5974
3	68	73	42	0.6	0.45	0.85	1.29	0.85	0.86	1.18	0.93	0	0.7	5063
B	48	57	31	0.59	0.78	0.97	1.75	0.97	0.98	1.4	1.38	0	0.67	3943
A	7	7	7	1	1	1	2	1	1	0.84	0.92	0	0.75	198
C	9	9	7	0.78	0.95	0.98	1.94	0.98	0.99	0.93	0.98	0	0.86	156
E	13	9	4	0.36	0.07	0	0.07	0.27	0.29	1.25	1.14	0.01	0.87	922
M	58	64	43	0.7	0.82	0.93	1.75	0.93	0.97	0.65	0.59	0	0.65	759
Helix 4	Base Pair (44:398)		BPC: cWW	AI: --	Strong
Frequency
Aln	GC	CG	UA	AU	GU	UG	AA	AC	AG	CA	CC	CU	GA	GG	UC	UU	gap	Seq
T	38.9*	1.1*	2.3*	39.8*	0.3	0.1	1.3	14.4	--	0.1	0.2	--	0.1	--	0.2	0.8	0.2	6046
3	44.3*	0.2*	0.2*	35.3*	0.3	0.1	1.3	16.7	--	--	0.2	--	0.1	--	0.3	0.8	0.4	5134
B	53.1*	0.1*	--	44.4*	0.4	--	1.2	0.3	--	--	--	--	--	--	--	--	0.2	4002
A	75.4*	2.0*	5.5*	14.6*	--	1.5	--	0.5	--	--	--	--	0.5	--	--	--	--	199
C	7.1*	--	--	91.0*	--	--	--	0.6	--	--	--	0.6	--	--	--	0.6	--	156
E	--	--	--	0.5	--	--	1.8	90.2*	0.2	--	0.8	--	--	--	1.3	4.3*	0.9	933
M	8.4*	7.2*	17.8*	59.9*	--	0.1	1.6	1.6	0.1	0.5	0.3	0.1	0.8	0.3	0.3	0.8	0.3	760
Collective Score
Aln	Xch	Ych	PE	PES	Cov1	Cov3	C1+C3	WC	WCGU	XCons	YCons	DfDel	PNuc	Seq
T	106	113	69	0.63	0.71	0.82	1.53	0.82	0.83	0.73	0.74	0	0.71	6046
3	56	56	41	0.73	0.64	0.8	1.45	0.8	0.81	0.86	0.91	0	0.71	5134
B	34	39	29	0.8	0.95	0.98	1.93	0.98	0.98	0.96	0.9	0	0.68	4002
A	15	15	12	0.8	0.9	0.97	1.87	0.97	0.99	0.91	0.92	0	0.75	199
C	5	4	2	0.44	0.79	0.98	1.77	0.98	0.98	1.53	1.58	0	0.86	156
E	7	2	0	0	0.48	0.95	1.44	0.01	0.01	1.55	1.57	0.01	0.88	933
M	45	53	27	0.55	0.84	0.94	1.77	0.94	0.94	0.48	0.47	0	0.65	760
Helix 4	Base Pair (45:396)		BPC: cWW	AI: --	Strong
Frequency
Aln	GC	CG	UA	AU	GU	UG	AA	AC	AG	CA	CC	CU	GA	GG	UC	UU	gap	Seq
T	21.4*	4.7	29.0*	7.6	1.4	17.3	0.1	0.8	14.4*	0.1	--	--	0.1	0.4	2.4	0.1	0.2	6007
3	21.5*	5.4	29.8*	1.7	0.7	20.2	0.1	--	16.9*	0.1	--	--	0.2	0.4	2.8	--	0.2	5092
B	27.0*	5.3*	37.2*	0.8*	0.2	25.2	--	--	--	0.1	--	--	0.2	0.1	3.6	--	0.2	3969
A	11.7*	31.4*	19.1*	16.0*	6.4	14.9	--	--	--	0.5	--	--	--	--	--	--	--	188
C	0.6*	--	93.6*	--	--	5.8	--	--	--	--	--	--	--	--	--	--	--	156
E	0.2	0.3	0.3*	2.5	1.7*	--	0.4	--	92.3*	--	--	--	--	2.1	--	--	0.1	935
M	24.8*	1.3*	10.9*	48.6*	6.2	0.3	0.7	6.2	--	--	--	--	--	0.1	0.1	0.5	0.4	763
Collective Score
Aln	Xch	Ych	PE	PES	Cov1	Cov3	C1+C3	WC	WCGU	XCons	YCons	DfDel	PNuc	Seq
T	134	168	78	0.52	0.51	0.65	1.15	0.63	0.81	0.29	0.14	0	0.7	6007
3	59	79	28	0.41	0.55	0.68	1.23	0.58	0.79	0.33	0.32	0	0.71	5092
B	37	65	19	0.37	0.53	0.7	1.24	0.7	0.96	0.78	0.34	0	0.68	3969
A	13	9	5	0.46	0.68	0.78	1.46	0.78	0.99	0.1	0.18	0	0.71	188
C	2	5	2	0.57	0.1	0	0.1	0.94	1	1.95	1.62	0	0.86	156
E	9	5	4	0.57	0.27	0.94	1.21	0.03	0.05	1.68	1.67	0	0.89	935
M	73	84	48	0.61	0.72	0.86	1.58	0.86	0.92	0.52	0.52	0	0.66	763
Helix 4	Base Pair (46:395)		BPC: cWW	AI: --	Strong
Frequency
Aln	GC	CG	UA	AU	GU	UG	AA	AC	AG	CA	CC	CU	GA	GG	UC	UU	gap	Seq
T	71.9*	2.2*	0.2*	20.4*	3.7	--	--	0.8	--	--	0.1	0.1	0.1	0.1	0.1	0.1	0.1	6074
3	78.5*	2.5*	0.1*	14.7*	3.6	--	--	0.1	--	--	0.1	--	--	0.1	0.1	--	0.2	5159
B	99.2*	--	--	0.1*	--	--	--	0.1	--	--	0.1	--	--	0.1	0.1	--	0.1	4020
A	17.9*	63.7*	3.0*	6.0*	8.5	--	--	0.5	--	--	--	--	--	--	0.5	--	--	201
C	97.4*	--	--	1.9*	--	--	--	--	--	--	--	--	--	0.6	--	--	--	156
E	2.9*	--	--	78.9*	17.9	--	--	--	--	--	--	--	--	--	--	--	0.3	938
M	21.6*	0.4*	0.9*	63.8*	4.7	0.3	0.1	5.7	0.3	--	0.3	0.7	0.3	--	0.1	0.5	0.4	768
Collective Score
Aln	Xch	Ych	PE	PES	Cov1	Cov3	C1+C3	WC	WCGU	XCons	YCons	DfDel	PNuc	Seq
T	86	90	50	0.57	0.82	0.95	1.77	0.95	0.99	1.05	1.04	0	0.71	6074
3	26	17	10	0.47	0.81	0.96	1.77	0.96	1	1.19	1.17	0	0.72	5159
B	8	3	1	0.18	0.19	0	0.19	0.99	0.99	1.93	1.96	0	0.69	4020
A	8	10	6	0.67	0.74	0.91	1.65	0.91	0.99	0.65	0.68	0	0.76	201
C	2	4	2	0.67	0.75	0.99	1.74	0.99	0.99	1.86	1.78	0	0.86	156
E	10	4	3	0.43	0.14	0	0.14	0.82	1	1.23	1.82	0	0.89	938
M	58	69	38	0.6	0.64	0.87	1.51	0.87	0.92	0.92	0.96	0	0.66	768
Helix 5	Base Pair (47:361)		BPC: cWW	AI: B	Strong
Frequency
Aln	GC	CG	UA	AU	GU	UG	AA	AC	AG	CA	CC	CU	GA	GG	UC	UU	gap	Seq
T	18.0*	65.2*	3.2*	2.5*	0.2	0.4	--	0.7	--	0.1	1.4	3.3	1.1	0.5	0.1	2.7	0.4	6093
3	21.2*	72.3*	3.5*	--	--	0.4	--	--	--	--	0.1	--	1.2	0.6	--	--	0.4	5173
B	--	92.6*	3.9*	--	--	0.5	--	--	--	--	--	--	1.6	0.7	--	--	0.3	4038
A	91.0*	0.5*	4.5*	--	--	--	--	--	--	--	0.5	--	--	1	--	--	2.5	199
C	--	96.8	--	--	--	--	--	--	--	0.6	1.3	--	--	0.6	--	--	0.6	156
E	97.6*	--	1.7*	0.1*	--	--	--	0.1	--	--	--	--	0.1	--	0.1	--	0.2	936
M	--	10.2	1.4*	19.9	1.3	0.1	0.1	5.6*	--	0.3	10.6	26.0*	0.5	--	0.9	22.4	0.7	773
Collective Score
Aln	Xch	Ych	PE	PES	Cov1	Cov3	C1+C3	WC	WCGU	XCons	YCons	DfDel	PNuc	Seq
T	85	51	22	0.32	0.69	0.89	1.58	0.89	0.9	0.75	0.66	0	0.71	6093
3	12	9	9	0.86	0.91	0.97	1.89	0.97	0.98	0.97	1	0	0.72	5173
B	6	3	3	0.67	0.57	0.97	1.54	0.97	0.97	1.55	1.67	0	0.69	4038
A	4	4	4	1	0.77	0.98	1.75	0.98	0.98	1.64	1.47	0.02	0.73	199
C	1	1	0	0	0	0	0	0.97	0.97	1.88	1.85	0.01	0.85	156
E	2	2	2	1	0.85	1	1.85	1	1	1.83	1.85	0	0.89	936
M	72	41	13	0.23	0.1	0	0.1	0.32	0.33	0.35	0.71	0	0.66	773
Helix 5	Base Pair (52:359)		BPC: cWW	AI: --	Strong
Frequency
Aln	GC	CG	UA	AU	GU	UG	AA	AC	AG	CA	CC	CU	GA	GG	UC	UU	gap	Seq
T	19.1*	60.4*	16.0*	2.5*	0.7	0.2	--	--	0.1	0.2	0.2	0.1	--	0.1	--	--	0.2	6188
3	22.4*	57.7*	15.0*	2.8*	0.8	0.2	--	0.1	0.2	0.1	0.2	0.1	--	0.1	--	--	0.1	5252
B	2.2*	72.8*	19.1*	3.6*	1	0.2	--	0.1	0.2	0.1	0.2	0.2	--	0.1	--	--	--	4113
A	95.5*	1.0*	--	--	--	--	--	--	--	--	1	--	--	--	--	--	2.5	199
C	--	96.2*	2.6*	--	--	--	--	--	--	0.6	--	--	--	--	--	--	0.6	156
E	95.6*	3.7*	0.1*	--	0.1	--	--	--	--	--	0.1	--	--	0.2	--	--	0.1	940
M	0.4*	70.8*	26.0*	0.4*	--	0.9	--	--	--	0.6	0.1	--	--	0.1	--	--	0.7	789
Collective Score
Aln	Xch	Ych	PE	PES	Cov1	Cov3	C1+C3	WC	WCGU	XCons	YCons	DfDel	PNuc	Seq
T	73	73	55	0.75	0.95	0.98	1.94	0.98	0.99	0.53	0.52	0	0.72	6188
3	43	39	31	0.76	0.95	0.98	1.94	0.98	0.99	0.5	0.48	0	0.73	5252
B	37	32	25	0.72	0.92	0.98	1.89	0.98	0.99	0.88	0.89	0	0.7	4113
A	1	1	1	1	0.5	0.99	1.49	0.99	0.99	1.86	1.73	0.02	0.73	199
C	2	3	2	0.8	0.8	0.99	1.79	0.99	0.99	1.83	1.74	0.01	0.85	156
E	5	6	5	0.91	0.9	1	1.9	1	1	1.74	1.75	0	0.89	940
M	28	31	22	0.75	0.94	0.98	1.92	0.98	0.99	1.02	1.04	0	0.68	789
Helix 5	Base Pair (53:358)		BPC: cWW	AI: --	Strong
Frequency
Aln	GC	CG	UA	AU	GU	UG	AA	AC	AG	CA	CC	CU	GA	GG	UC	UU	gap	Seq
T	2.5*	18.4*	--	77.2*	1.2	--	--	0.1	--	--	0.1	0.1	--	--	--	0.1	0.1	6181
3	3.0*	21.7*	--	73.5*	1.3	--	--	0.1	--	--	0.1	0.1	--	--	--	0.1	0.1	5240
B	3.8*	0.1*	--	94.0*	1.6	--	--	0.1	--	--	--	0.1	--	--	--	0.1	0.1	4095
A	--	96.5*	--	1.0*	--	--	--	--	--	--	2.5	--	--	--	--	--	--	201
C	--	--	--	100	--	--	--	--	--	--	--	--	--	--	--	--	--	158
E	--	99.6*	--	0.1*	--	0.1	--	--	0.1	--	--	--	--	--	--	--	0.1	944
M	--	0.1	--	97.7*	0.9	0.1*	0.1	0.1	--	--	--	--	--	--	--	0.3	0.7	792
Collective Score
Aln	Xch	Ych	PE	PES	Cov1	Cov3	C1+C3	WC	WCGU	XCons	YCons	DfDel	PNuc	Seq
T	22	16	9	0.47	0.93	0.98	1.91	0.98	0.99	1.07	1.15	0	0.72	6181
3	19	12	8	0.52	0.93	0.98	1.92	0.98	0.99	1	1.08	0	0.73	5240
B	16	9	6	0.48	0.65	0.98	1.63	0.98	1	1.66	1.75	0	0.7	4095
A	0	1	0	0	0.29	0.97	1.26	0.97	0.97	1.92	1.71	0	0.76	201
C	0	0	0	0	0	0	0	1	1	2	2	0	0.87	158
E	3	2	2	0.8	0.33	1	1.33	1	1	1.95	1.99	0	0.9	944
M	3	4	1	0.29	0.08	0	0.08	0.98	0.99	1.81	1.89	0	0.68	792
Helix 5	Base Pair (54:357)		BPC: cWW	AI: --	Weak
Frequency
Aln	GC	CG	UA	AU	GU	UG	AA	AC	AG	CA	CC	CU	GA	GG	UC	UU	gap	Seq
T	--	99.0*	0.3*	--	--	0.3	--	--	0.1	0.1	--	--	--	--	--	--	--	6225
3	--	99.3*	0.3*	--	--	0.1	--	--	0.1	0.1	--	--	--	--	--	--	--	5285
B	--	99.3*	0.4*	--	--	0.1	--	--	0.1	--	--	--	--	--	--	--	--	4138
A	--	97.5	--	--	--	--	--	--	--	2.5	--	--	--	--	--	--	--	201
C	--	100	--	--	--	--	--	--	--	--	--	--	--	--	--	--	--	158
E	--	99.6	--	--	--	0.2	--	--	--	--	--	0.1	--	--	--	--	0.1	946
M	--	96.6*	0.1	--	--	2.1	0.1*	--	0.3	--	--	0.1	--	--	--	--	0.6	791
Collective Score
Aln	Xch	Ych	PE	PES	Cov1	Cov3	C1+C3	WC	WCGU	XCons	YCons	DfDel	PNuc	Seq
T	12	6	2	0.22	0.29	0.99	1.28	0.99	1	1.92	1.94	0	0.73	6225
3	6	2	1	0.25	0.41	1	1.4	1	1	1.94	1.94	0	0.74	5285
B	5	2	1	0.29	0.52	1	1.51	1	1	1.94	1.94	0	0.71	4138
A	0	0	0	0	0	0	0	0.97	0.97	2	1.85	0	0.76	201
C	0	0	0	0	0	0	0	1	1	2	2	0	0.87	158
E	1	0	0	0	0	0	0	1	1	1.96	1.98	0	0.9	946
M	6	4	1	0.2	0.04	0	0.04	0.97	0.99	1.74	1.91	0	0.68	791
Helix 5	Base Pair (56:356)		BPC: cWW	AI: --	Weak
Frequency
Aln	GC	CG	UA	AU	GU	UG	AA	AC	AG	CA	CC	CU	GA	GG	UC	UU	gap	Seq
T	--	--	99.5	--	--	--	--	--	--	0.1	--	--	0.1	--	--	--	0.2	6225
3	--	--	99.6	--	--	--	--	--	--	--	--	--	0.1	--	--	0.1	0.1	5283
B	--	--	99.8	--	--	--	--	--	--	--	--	--	0.1	--	--	0.1	--	4124
A	--	--	97.5	--	--	--	--	--	--	--	--	--	--	--	--	--	2.5	201
C	--	--	100	--	--	--	--	--	--	--	--	--	--	--	--	--	--	158
E	--	--	99.5	--	--	--	0.2	--	--	--	--	--	0.1	--	0.1	--	0.1	958
M	--	--	98.6	--	--	0.3	--	--	--	0.5	--	--	--	--	--	--	0.6	793
Collective Score
Aln	Xch	Ych	PE	PES	Cov1	Cov3	C1+C3	WC	WCGU	XCons	YCons	DfDel	PNuc	Seq
T	4	4	1	0.25	0	0	0	1	1	1.96	1.97	0	0.73	6225
3	2	2	0	0	0	0	0	1	1	1.98	1.98	0	0.73	5283
B	1	1	0	0	0	0	0	1	1	1.98	1.99	0	0.7	4124
A	0	0	0	0	0	0	0	1	1	2	1.8	0.02	0.74	201
C	0	0	0	0	0	0	0	1	1	2	2	0	0.87	158
E	1	1	0	0	0	0	0	1	1	1.95	1.99	0	0.91	958
M	2	2	1	0.5	0	0	0	0.99	0.99	1.89	1.91	0	0.68	793
Helix 5	Base Pair (57:355)		BPC: cWW	AI: --	Strong
Frequency
Aln	GC	CG	UA	AU	GU	UG	AA	AC	AG	CA	CC	CU	GA	GG	UC	UU	gap	Seq
T	98.7	--	--	--	--	--	--	0.3	--	--	0.3	--	0.1	0.1	0.2	--	0.3	6323
3	98.8	--	--	--	0.1	--	--	0.2	--	--	0.3	--	0.1	0.1	0.2	--	0.2	5351
B	98.8	--	--	--	0.1	--	--	0.3	--	--	0.4	--	0.1	0.1	0.2	--	--	4194
A	95.5	--	--	--	--	--	--	--	--	--	--	--	--	1.5	--	--	3	200
C	99.4	--	--	--	--	--	--	0.6	--	--	--	--	--	--	--	--	--	157
E	99.7	--	--	--	--	--	--	--	--	--	--	--	--	0.1	0.1	--	0.1	957
M	97.5*	--	--	0.5*	--	--	--	0.7	--	--	--	--	0.5	0.1	--	--	0.7	824
Collective Score
Aln	Xch	Ych	PE	PES	Cov1	Cov3	C1+C3	WC	WCGU	XCons	YCons	DfDel	PNuc	Seq
T	15	9	2	0.17	0.04	0	0.04	0.99	0.99	1.91	1.94	0	0.74	6323
3	11	4	0	0	0	0	0	0.99	0.99	1.92	1.96	0	0.74	5351
B	11	3	0	0	0	0	0	0.99	0.99	1.91	1.97	0	0.71	4194
A	0	1	0	0	0	0	0	0.98	0.98	2	1.67	0.02	0.73	200
C	1	0	0	0	0	0	0	0.99	0.99	1.95	2	0	0.86	157
E	0	0	0	0	0	0	0	1	1	1.97	1.99	0	0.91	957
M	3	5	2	0.5	0.27	0.99	1.25	0.99	0.99	1.83	1.84	0	0.7	824
Helix 5	Base Pair (58:354)		BPC: cWW	AI: --	Weak
Frequency
Aln	GC	CG	UA	AU	GU	UG	AA	AC	AG	CA	CC	CU	GA	GG	UC	UU	gap	Seq
T	0.6*	98.2*	--	--	--	0.3	--	--	0.1	0.1	0.2	--	--	0.1	--	--	0.3	6357
3	0.7*	98.5*	--	--	--	0.1	--	--	0.1	0.1	0.2	--	--	0.1	--	--	0.2	5381
B	--	99.3	--	--	--	0.1	--	--	0.1	0.1	0.2	--	--	0.1	--	--	0.1	4221
A	19.0*	76.5*	--	--	--	0.5	--	--	--	--	1.5	--	--	--	--	--	2.5	200
C	--	100	--	--	--	--	--	--	--	--	--	--	--	--	--	--	--	158
E	--	99.6	--	--	--	0.1	--	--	0.1	--	--	--	--	0.1	--	--	0.1	960
M	0.4*	96.1*	0.2*	0.2*	--	1.6	0.1	--	0.4	--	--	--	--	0.1	--	0.2	0.6	827
Collective Score
Aln	Xch	Ych	PE	PES	Cov1	Cov3	C1+C3	WC	WCGU	XCons	YCons	DfDel	PNuc	Seq
T	16	11	3	0.22	0.46	0.99	1.45	0.99	0.99	1.87	1.88	0	0.74	6357
3	9	6	2	0.27	0.54	0.99	1.54	0.99	0.99	1.9	1.89	0	0.75	5381
B	5	3	0	0	0	0	0	0.99	0.99	1.96	1.94	0	0.72	4221
A	4	3	2	0.57	0.91	0.98	1.88	0.98	0.98	1.24	1.11	0.02	0.74	200
C	0	0	0	0	0	0	0	1	1	2	2	0	0.87	158
E	0	0	0	0	0	0	0	1	1	1.95	1.99	0	0.91	960
M	7	5	1	0.17	0.26	0.98	1.24	0.98	0.99	1.69	1.82	0	0.71	827
Helix 6	Base Pair (61:106)		BPC: cWW	AI: --	Strong
Frequency
Aln	GC	CG	UA	AU	GU	UG	AA	AC	AG	CA	CC	CU	GA	GG	UC	UU	gap	Seq
T	96.2*	--	--	2.0*	0.6	--	--	0.1	--	--	0.2	--	0.1	0.3	--	--	0.4	6539
3	98.1*	--	--	0.3*	0.6	--	--	0.1	--	--	0.2	--	0.1	0.3	0.1	--	0.2	5558
B	98.5*	--	--	0.3*	0.2	--	--	0.1	--	--	0.2	--	--	0.3	--	--	0.3	4392
A	99.5	--	--	--	--	--	--	--	--	--	--	--	--	0.5	--	--	--	203
C	97.5*	--	--	2.5*	--	--	--	--	--	--	--	--	--	--	--	--	--	162
E	96.3*	--	--	0.3*	2.6	--	--	--	--	--	0.1	--	0.2	0.1	0.2	0.1	0.1	963
M	81.9*	--	--	13.8*	1.4	0.1*	0.2	0.6	--	0.1*	--	--	0.1	0.2	--	--	1.3	828
Collective Score
Aln	Xch	Ych	PE	PES	Cov1	Cov3	C1+C3	WC	WCGU	XCons	YCons	DfDel	PNuc	Seq
T	23	39	13	0.42	0.6	0.99	1.58	0.99	0.99	1.79	1.75	0	0.77	6539
3	10	21	3	0.19	0.21	0.99	1.19	0.99	0.99	1.92	1.87	0	0.77	5558
B	9	10	2	0.21	0.29	0.99	1.29	0.99	0.99	1.91	1.9	0	0.75	4392
A	0	1	0	0	0	0	0	0.99	0.99	2	1.96	0	0.77	203
C	1	1	1	1	1	1	2	1	1	1.83	1.84	0	0.89	162
E	1	10	1	0.18	0.09	0	0.09	0.97	0.99	1.91	1.77	0	0.91	963
M	12	17	9	0.62	0.84	0.97	1.81	0.97	0.99	1.27	1.18	0.01	0.7	828
Helix 6	Base Pair (62:105)		BPC: cWW	AI: --	Weak
Frequency
Aln	GC	CG	UA	AU	GU	UG	AA	AC	AG	CA	CC	CU	GA	GG	UC	UU	gap	Seq
T	0.1	1.4	1.1	0.2	--	94.0*	0.1	0.2*	0.1	0.9*	0.5	--	--	0.1	0.4	0.2	0.6	6551
3	--	1	0.7	--	--	97.6	--	--	--	--	--	--	--	0.1	0.3	0.1	0.1	5571
B	--	0.4	0.2	--	--	98.6	--	--	--	--	--	--	--	--	0.4	0.2	0.1	4404
A	--	--	--	--	--	100	--	--	--	--	--	--	--	--	--	--	--	202
C	--	--	--	--	--	99.4	--	--	--	--	--	--	--	--	--	--	0.6	162
E	--	--	--	--	--	--	--	--	--	--	--	--	--	--	--	--	100	965
M	1	4.7	4	1.3	--	68.2*	0.5	1.8*	1	6.8*	3.9	0.1	--	--	0.8	1	4.7	827
Collective Score
Aln	Xch	Ych	PE	PES	Cov1	Cov3	C1+C3	WC	WCGU	XCons	YCons	DfDel	PNuc	Seq
T	65	65	17	0.26	0.21	0.96	1.16	0.03	0.97	1.64	1.66	0	0.76	6551
3	9	18	1	0.07	0.01	0	0.01	0.02	0.99	1.9	1.87	0	0.78	5571
B	4	12	1	0.12	0.02	0	0.02	0.01	0.99	1.95	1.9	0	0.75	4404
A	0	0	0	0	0	0	0	0	1	2	2	0	0.77	202
C	0	0	0	0	0	0	0	0	1	2	1.94	0.01	0.89	162
E	5	6	0	0	0	0	0	0	0	1.72	-0.01	0	0	965
M	56	47	16	0.31	0.32	0.81	1.13	0.12	0.83	0.51	0.67	0.04	0.68	827
Helix 6	Base Pair (63:104)		BPC: cWW	AI: --	Strong
Frequency
Aln	GC	CG	UA	AU	GU	UG	AA	AC	AG	CA	CC	CU	GA	GG	UC	UU	gap	Seq
T	0.1*	71.2*	1.2*	0.3*	--	0.5	--	--	--	0.1	--	--	--	0.1	--	--	26.4	6600
3	0.1*	80.3*	1.0*	0.2*	--	0.3	--	--	--	0.1	0.1	--	--	0.1	--	--	17.7	5580
B	0.1*	98.0*	0.7*	0.3*	--	0.2	--	--	--	0.1	0.1	--	--	0.1	--	--	0.2	4402
A	--	82.2*	11.9*	--	--	5	--	--	--	--	--	--	--	1	--	--	--	202
C	--	85.8*	6.8*	--	--	6.8	--	--	--	--	--	0.6	--	--	--	--	--	162
E	0.1	69.3*	--	--	0.1*	0.6	--	--	0.6	--	0.1	--	--	24.3	--	--	4.8	971
M	--	8.9*	1.7*	0.7*	--	0.1	--	--	--	--	--	--	0.1	--	--	--	88.4	867
Collective Score
Aln	Xch	Ych	PE	PES	Cov1	Cov3	C1+C3	WC	WCGU	XCons	YCons	DfDel	PNuc	Seq
T	57	41	27	0.55	0.67	0.99	1.66	0.99	1	0.79	0.5	0.11	0.57	6600
3	34	21	13	0.47	0.07	0	0.07	0.82	0.82	1.5	0.85	0	0	5580
B	14	12	8	0.61	0.65	0.99	1.64	0.99	1	1.86	1.84	0	0.75	4402
A	10	9	5	0.53	0.67	0.94	1.61	0.94	0.99	1.27	1.43	0	0.77	202
C	9	8	4	0.47	0.48	0.93	1.4	0.93	0.99	1.43	1.6	0	0.89	162
E	10	0	0	0	0	0	0	0.73	0.74	0.72	1.74	0.05	0.88	971
M	14	12	10	0.77	0.03	0	0.03	0.11	0.11	-0.4	-0.51	0	0	867
Helix 6	Base Pair (66:103)		BPC: cWW	AI: --	Strong
Frequency
Aln	GC	CG	UA	AU	GU	UG	AA	AC	AG	CA	CC	CU	GA	GG	UC	UU	gap	Seq
T	30.3*	0.1*	0.7*	53.9*	0.7	0.3	--	2	0.1	--	--	0.1	--	0.1	0.1	0.1	11.3	6563
3	35.7*	0.1*	0.8*	58.9*	0.9	0.3	0.1	2.4	0.1	--	0.1	0.1	0.1	0.2	0.1	0.1	0.2	5579
B	43.8*	--	0.4*	53.9*	0.9	--	--	0.4	--	--	--	0.1	--	0.1	0.1	--	0.2	4409
A	30.7*	--	4.5*	61.8*	0.5	--	--	--	--	--	0.5	--	0.5	--	--	--	1.5	199
C	--	--	--	100	--	--	--	--	--	--	--	--	--	--	--	--	--	163
E	--	0.7	1.8	81.2*	0.8	1.8*	0.1	11.9	0.6	--	0.1*	0.1	0.1*	0.5	--	0.2	0.1	971
M	0.1*	0.2*	0.7*	10.2*	--	0.2	--	--	--	0.2	--	--	--	--	--	0.1	88	830
Collective Score
Aln	Xch	Ych	PE	PES	Cov1	Cov3	C1+C3	WC	WCGU	XCons	YCons	DfDel	PNuc	Seq
T	112	108	77	0.7	0.9	0.96	1.85	0.96	0.97	0.28	0.34	0.01	0.68	6563
3	102	100	69	0.68	0.9	0.96	1.85	0.96	0.97	0.92	0.9	0	0.78	5579
B	85	80	61	0.74	0.96	0.98	1.95	0.98	0.99	0.94	0.94	0	0.75	4409
A	10	11	9	0.86	0.96	0.98	1.94	0.98	0.99	0.68	0.83	0.01	0.74	199
C	1	1	1	1	0	0	0	1	1	2	2	0	0.9	163
E	7	9	0	0	0.13	0	0.13	0.84	0.86	1.57	1.06	0	0.92	971
M	9	7	7	0.88	0.01	0	0.01	0.11	0.12	-0.37	-0.38	0	0	830
Helix 6	Base Pair (67:102)		BPC: cWW	AI: --	Strong
Frequency
Aln	GC	CG	UA	AU	GU	UG	AA	AC	AG	CA	CC	CU	GA	GG	UC	UU	gap	Seq
T	16.6*	68.6*	1.5*	0.7*	0.2	0.1	0.1	0.1	0.1	0.3	0.2	0.1	--	0.2	0.1	--	11.1	6597
3	19.5*	76.6*	1.4*	0.7*	0.2	--	0.1	0.1	0.1	0.4	0.1	0.1	--	0.3	0.1	--	0.3	5613
B	3.4*	94.5*	0.3*	0.1*	0.1	--	--	--	0.1	0.5	0.2	0.1	--	0.3	--	--	0.3	4438
A	11.4*	50.7*	25.4*	11.9*	--	--	--	--	--	--	--	--	--	--	--	--	0.5	201
C	--	95.7*	1.8*	0.6*	--	--	--	--	--	--	1.2	--	--	--	--	0.6	--	163
E	94.6*	0.2*	1.4*	1.0*	0.5	--	0.4	0.4	0.3	--	--	--	--	0.1	0.8	0.1	0.1	974
M	0.2*	8.6*	1.9*	0.6*	--	0.2	0.1	--	--	--	--	--	--	--	--	0.1	88.1	830
Collective Score
Aln	Xch	Ych	PE	PES	Cov1	Cov3	C1+C3	WC	WCGU	XCons	YCons	DfDel	PNuc	Seq
T	58	66	40	0.65	0.93	0.98	1.91	0.98	0.99	0.41	0.47	0.01	0.69	6597
3	46	54	32	0.64	0.93	0.98	1.92	0.98	0.99	1.07	1.05	0	0.78	5613
B	28	35	18	0.57	0.73	0.99	1.71	0.99	0.99	1.69	1.65	0	0.76	4438
A	11	11	11	1	1	1	2	1	1	0.29	0.23	0	0.76	201
C	2	4	1	0.33	0.57	0.98	1.55	0.98	0.98	1.78	1.69	0	0.9	163
E	7	8	3	0.4	0.5	0.97	1.47	0.97	0.98	1.66	1.68	0	0.92	974
M	10	8	7	0.78	0.03	0	0.03	0.11	0.12	-0.42	-0.42	0	0	830
Helix 6	Base Pair (68:101)		BPC: cWW	AI: B	Weak
Frequency
Aln	GC	CG	UA	AU	GU	UG	AA	AC	AG	CA	CC	CU	GA	GG	UC	UU	gap	Seq
T	3.1	0.3	13.9	0.7*	0.3	0.3*	0.2	--	0.1	0.2	--	--	68.8*	0.4	--	0.2	11.6	6584
3	3.4	0.3*	16.3	0.7*	0.2	0.3	0.2	--	0.1	0.3	--	--	77.1*	0.4	--	0.2	0.6	5599
B	0.7	--	0.1	--	0.2	0.3*	0.2	--	--	0.3	--	--	97.0*	0.5	--	--	0.6	4427
A	78.9*	--	--	6.0*	0.5	1.0*	--	--	--	--	--	--	11.6	0.5	--	--	1.5	199
C	1.8	--	2.4	0.6*	0.6	--	--	--	--	--	--	--	92.7*	1.8	--	--	--	164
E	--	1.5*	93.1*	2.6*	--	0.3	0.2	--	0.2	0.2	--	0.1	0.2	0.1	--	1.3	0.1	973
M	1.2	--	0.4	0.7*	1.2	--	--	--	0.1	--	--	--	6.9*	0.1	--	0.1	89.2	830
Collective Score
Aln	Xch	Ych	PE	PES	Cov1	Cov3	C1+C3	WC	WCGU	XCons	YCons	DfDel	PNuc	Seq
T	39	50	15	0.34	0.05	0	0.05	0.2	0.21	0.52	0.9	0.01	0.68	6584
3	27	32	7	0.24	0.04	0	0.04	0.21	0.21	1.18	1.55	0	0.78	5599
B	15	18	1	0.06	0.13	0	0.13	0.01	0.01	1.86	1.76	0	0.75	4427
A	4	8	3	0.5	0.36	0.87	1.23	0.86	0.88	1.45	0.91	0	0.74	199
C	4	5	1	0.22	0.08	0	0.08	0.05	0.06	1.78	1.65	0	0.9	164
E	8	6	3	0.43	0.61	0.97	1.58	0.97	0.98	1.63	1.6	0	0.92	973
M	8	13	7	0.67	0.01	0	0.01	0.02	0.04	-0.33	-0.42	0	0	830
Helix 6	Base Pair (69:99)		BPC: cWW	AI: --	Strong
Frequency
Aln	GC	CG	UA	AU	GU	UG	AA	AC	AG	CA	CC	CU	GA	GG	UC	UU	gap	Seq
T	29.7*	6.2*	0.9*	13.4*	9.3	0.1	0.4	0.4	1.6	0.1	0.1	0.4	0.4	0.6	--	0.1	36.3	6585
3	34.0*	7.2*	0.4*	14.8*	10.6	0.2	0.3	0.2	1.2	0.1	0.1	0.5	0.4	0.7	--	--	29.4	5600
B	43.5*	9.2*	0.5*	19.0*	13.6	0.2	0.4	0.3	1.5	0.1	0.1	0.6	0.5	0.8	--	--	9.5	4378
A	--	--	--	--	--	--	--	--	--	--	--	--	--	--	--	--	100	202
C	31.7*	1.8*	1.2*	28.0*	11.6	--	4.9	7.9	5.5	--	1.8	--	2.4	0.6	--	1.8	0.6	164
E	--	--	--	--	--	--	--	--	--	--	--	--	--	--	--	--	100	1020
M	--	0.2	4.6*	0.5	--	--	0.5	--	3.3*	0.1	0.1*	--	0.1	--	--	0.4	90.3	830
Collective Score
Aln	Xch	Ych	PE	PES	Cov1	Cov3	C1+C3	WC	WCGU	XCons	YCons	DfDel	PNuc	Seq
T	132	139	48	0.35	0.6	0.79	1.39	0.79	0.94	-0.55	-0.67	0.01	0.49	6585
3	99	116	40	0.37	0.61	0.8	1.41	0.8	0.95	-0.37	-0.53	0.01	0.55	5600
B	99	116	40	0.37	0.61	0.8	1.41	0.8	0.95	0.2	-0.02	0.01	0.68	4378
A	0	0	0	0	0	0	0	0	0	0	0	0	0	202
C	20	20	5	0.25	0.46	0.63	1.09	0.63	0.75	0.59	0.31	0	0.9	164
E	0	0	0	0	0	0	0	0	0	-0.02	-0.02	0	0	1020
M	13	3	3	0.38	0.04	0	0.04	0.05	0.05	-0.41	-0.4	0	0	830
Helix 6	Base Pair (70:98)		BPC: cWW	AI: --	Strong
Frequency
Aln	GC	CG	UA	AU	GU	UG	AA	AC	AG	CA	CC	CU	GA	GG	UC	UU	gap	Seq
T	6.3*	10.6*	15.7*	21.4*	5	0.9	0.2	0.2	0.2	0.5	0.2	--	0.6	0.2	0.3	0.3	37.3	6610
3	6.4*	12.5*	17.9*	24.0*	5.4	1	0.2	0.2	0.2	0.1	0.2	--	0.6	0.2	--	0.3	30.7	5626
B	8.2*	15.9*	22.9*	30.7*	6.9	1.2	0.3	0.2	0.2	0.1	0.2	--	0.7	0.3	--	0.3	11.5	4404
A	--	--	--	--	--	--	--	--	--	--	--	--	--	--	--	--	100	202
C	34.4*	--	3.1*	36.2*	13.5	1.2	--	1.8	--	--	0.6	--	2.5	1.8	--	2.5	2.4	163
E	--	--	--	--	--	--	--	--	--	--	--	--	--	--	--	--	100	1020
M	0.1	0.1	2.7	0.6*	0.2	--	--	--	0.1	3.1*	--	--	--	--	2.3*	0.4	90.3	830
Collective Score
Aln	Xch	Ych	PE	PES	Cov1	Cov3	C1+C3	WC	WCGU	XCons	YCons	DfDel	PNuc	Seq
T	186	181	107	0.58	0.79	0.86	1.66	0.86	0.96	-0.92	-0.85	0	0.48	6610
3	158	157	96	0.61	0.81	0.88	1.69	0.88	0.97	-0.83	-0.76	0.01	0.54	5626
B	158	157	96	0.61	0.81	0.88	1.69	0.88	0.97	-0.42	-0.35	0.01	0.67	4404
A	0	0	0	0	0	0	0	0	0	0	0	0	0	202
C	18	18	7	0.39	0.61	0.76	1.36	0.76	0.91	0.52	0.41	0.01	0.87	163
E	0	0	0	0	0	0	0	0	0	-0.01	0	0	0	1020
M	10	6	4	0.5	0.03	0	0.03	0.04	0.04	-0.4	-0.41	0	0	830
Helix 6	Base Pair (73:97)		BPC: cWW	AI: --	Strong
Frequency
Aln	GC	CG	UA	AU	GU	UG	AA	AC	AG	CA	CC	CU	GA	GG	UC	UU	gap	Seq
T	7.9*	19.4*	1.4*	1.2*	0.3	0.7	0.2	0.1	0.2	--	--	0.1	0.1	0.1	--	0.2	68.2	6642
3	9.2*	22.7*	1.0*	0.8*	0.3	0.8	0.1	0.1	0.3	--	--	0.1	0.1	0.1	--	0.1	64.3	5657
B	11.8*	29.0*	1.2*	1.0*	0.4	1	0.1	0.1	0.3	--	--	0.1	0.1	0.2	--	0.1	54.7	4435
A	--	--	--	--	--	--	--	--	--	--	--	--	--	--	--	--	100	202
C	--	0.6*	3.0*	1.8*	1.2	--	1.2	--	--	--	--	--	0.6	--	0.6	3	87.8	164
E	--	--	--	--	--	--	--	--	--	--	--	--	--	--	--	--	100	1020
M	--	0.1*	4.2*	3.6*	--	--	0.7	--	0.1	--	--	0.1	--	--	--	0.5	90.5	830
Collective Score
Aln	Xch	Ych	PE	PES	Cov1	Cov3	C1+C3	WC	WCGU	XCons	YCons	DfDel	PNuc	Seq
T	60	53	23	0.41	0.84	0.94	1.78	0.94	0.97	-0.73	-0.71	0	0.25	6642
3	54	46	23	0.46	0.85	0.95	1.8	0.95	0.98	-0.7	-0.67	0.01	0.28	5657
B	54	46	23	0.46	0.85	0.95	1.8	0.95	0.98	-0.68	-0.64	0.01	0.34	4435
A	0	0	0	0	0	0	0	0	0	0	0	0	0	202
C	2	2	0	0	0.27	0.45	0.72	0.45	0.55	-0.51	-0.49	0.02	0.11	164
E	0	0	0	0	0	0	0	0	0	-0.01	0	0	0	1020
M	4	5	0	0	0.04	0	0.04	0.08	0.08	-0.36	-0.39	0	0	830
Helix 6	Base Pair (74:96)		BPC: cWW	AI: --	Strong
Frequency
Aln	GC	CG	UA	AU	GU	UG	AA	AC	AG	CA	CC	CU	GA	GG	UC	UU	gap	Seq
T	5.1*	1.4*	2.4*	11.0*	0.4	0.7	0.1	--	--	--	--	--	0.3	0.1	--	0.4	78	6634
3	6.0*	1.6*	2.3*	12.8*	0.5	0.3	--	--	--	--	--	--	0.4	0.1	--	0.1	75.7	5649
B	7.7*	2.0*	3.0*	16.4*	0.6	0.4	--	--	--	--	--	--	0.5	0.1	--	0.1	69	4427
A	--	--	--	--	--	--	--	--	--	--	--	--	--	--	--	--	100	202
C	--	--	2.4	1.2	0.6	--	1.8*	--	--	--	--	--	1.2	2.4*	--	3.0*	87.2	164
E	--	--	--	--	--	--	--	--	--	--	--	--	--	--	--	--	100	1020
M	--	0.6	2.9	0.4*	--	3.1*	0.2	--	--	0.1*	--	--	--	--	--	1.9	90.7	830
Collective Score
Aln	Xch	Ych	PE	PES	Cov1	Cov3	C1+C3	WC	WCGU	XCons	YCons	DfDel	PNuc	Seq
T	75	74	38	0.51	0.8	0.9	1.7	0.9	0.95	-0.7	-0.81	0.05	0.17	6634
3	65	69	36	0.54	0.87	0.94	1.8	0.94	0.97	-0.71	-0.84	0.05	0.19	5649
B	65	69	36	0.54	0.15	0	0.15	0.29	0.3	-0.78	-0.9	0	0	4427
A	0	0	0	0	0	0	0	0	0	0	0	0	0	202
C	4	1	0	0	0.44	0.57	1.01	0.29	0.33	-0.53	-0.52	0.02	0.12	164
E	0	0	0	0	0	0	0	0	0	-0.01	0	0	0	1020
M	6	4	2	0.4	0.01	0	0.01	0.04	0.07	-0.32	-0.41	0	0	830
Helix 6	Base Pair (75:95)		BPC: cWW	AI: --	Strong
Frequency
Aln	GC	CG	UA	AU	GU	UG	AA	AC	AG	CA	CC	CU	GA	GG	UC	UU	gap	Seq
T	8.3*	5.0*	3.7*	1.0*	4.9	0.6	0.3	--	1.4	--	0.1	0.3	0.3	0.1	--	0.1	74	6635
3	9.7*	5.9*	3.6*	1.1*	5.7	0.4	0.1	--	1.6	--	0.1	0.3	0.4	0.1	--	0.1	70.9	5650
B	12.4*	7.5*	4.6*	1.4*	7.3	0.5	0.1	--	2	--	0.1	0.4	0.5	0.1	--	0.1	63	4428
A	--	--	--	--	--	--	--	--	--	--	--	--	--	--	--	--	100	202
C	--	0.6	4.3*	3.0*	0.6	--	1.2	--	--	--	1.8*	0.6	--	--	0.6	1.2	85.9	164
E	--	--	--	--	--	--	--	--	--	--	--	--	--	--	--	--	100	1020
M	--	0.1*	4.1*	0.1*	--	2	1.4	0.1	0.1	--	--	--	0.1	--	--	0.5	91.2	830
Collective Score
Aln	Xch	Ych	PE	PES	Cov1	Cov3	C1+C3	WC	WCGU	XCons	YCons	DfDel	PNuc	Seq
T	93	93	54	0.58	0.55	0.69	1.23	0.69	0.9	-0.76	-0.83	0	0.2	6635
3	87	83	54	0.64	0.55	0.7	1.25	0.7	0.91	-0.78	-0.86	0.01	0.23	5650
B	87	83	54	0.64	0.55	0.7	1.25	0.7	0.91	-0.83	-0.93	0.01	0.28	4428
A	0	0	0	0	0	0	0	0	0	0	0	0	0	202
C	4	3	0	0	0.5	0.65	1.15	0.56	0.61	-0.65	-0.57	0.06	0.13	164
E	0	0	0	0	0	0	0	0	0	-0.01	0	0	0	1020
M	2	7	0	0	0	0	0	0.04	0.06	-0.32	-0.39	0	0	830
Helix 6	Base Pair (76:93)		BPC: cWW	AI: --	Strong
Frequency
Aln	GC	CG	UA	AU	GU	UG	AA	AC	AG	CA	CC	CU	GA	GG	UC	UU	gap	Seq
T	2.5*	3.3*	3.6*	5.9*	4	0.8	0.4	0.2	3.4	--	--	--	0.6	0.5	0.1	0.6	74	6662
3	2.9*	3.5*	3.9*	6.0*	4.7	0.8	0.4	0.2	3.9	--	--	--	0.7	0.6	0.1	0.5	71.9	5677
B	3.6*	4.4*	5.0*	7.7*	5.9	1.1	0.5	0.2	4.9	--	--	--	0.9	0.7	0.1	0.7	64.2	4456
A	4	--	--	--	--	--	--	--	--	--	--	--	--	--	--	--	96	201
C	1.2*	4.3*	7.9*	14.6*	0.6	1.8	--	0.6	3	--	--	--	--	--	--	0.6	65.2	164
E	--	--	--	--	--	--	--	--	--	--	--	--	--	--	--	--	100	1020
M	--	2.3*	0.2*	3.0*	0.1	--	0.2	0.5	--	--	--	0.1	--	--	--	1.2	92.3	830
Collective Score
Aln	Xch	Ych	PE	PES	Cov1	Cov3	C1+C3	WC	WCGU	XCons	YCons	DfDel	PNuc	Seq
T	124	130	47	0.37	0.47	0.59	1.06	0.59	0.78	-0.8	-0.79	0.01	0.2	6662
3	114	119	41	0.35	0.47	0.58	1.04	0.58	0.77	-0.83	-0.82	0	0.22	5677
B	114	119	41	0.35	0.46	0.58	1.04	0.58	0.77	-0.91	-0.89	0	0.27	4456
A	0	0	0	0	0	0	0	0.04	0.04	-0.17	-0.2	0	0	201
C	9	9	5	0.56	0.67	0.81	1.47	0.81	0.88	-0.8	-0.83	0.03	0.31	164
E	0	0	0	0	0	0	0	0	0	-0.01	0	0	0	1020
M	1	2	1	0.67	0.03	0	0.03	0.06	0.06	-0.36	-0.37	0	0	830
Helix 6	Base Pair (77:92)		BPC: cWW	AI: --	Strong
Frequency
Aln	GC	CG	UA	AU	GU	UG	AA	AC	AG	CA	CC	CU	GA	GG	UC	UU	gap	Seq
T	4.9*	3.4*	5.4*	8.4*	5	2.2	0.2	0.1	2.4	--	--	0.1	0.6	0.1	0.4	0.5	66.5	6626
3	5.3*	3.9*	5.8*	9.3*	5.3	2.6	0.2	0.1	2.8	0.1	--	0.1	0.7	0.1	0.5	0.5	62.7	5641
B	6.6*	4.6*	7.4*	11.8*	6.8	3.1	0.2	0.2	3.5	0.1	--	0.1	0.8	0.1	0.6	0.7	53.1	4420
A	3.5*	9.5*	--	1.0*	0.5	3	--	--	0.5	--	--	--	--	--	--	--	82.1	201
C	0.6*	1.8*	12.8*	17.7*	2.4	--	--	--	1.2	--	--	--	--	0.6	--	--	62.8	164
E	--	--	--	--	--	--	--	--	--	--	--	--	--	--	--	--	100	1020
M	2.8*	--	1.1*	0.6*	2.8	--	0.4	--	--	--	--	--	--	0.1	--	--	92.2	830
Collective Score
Aln	Xch	Ych	PE	PES	Cov1	Cov3	C1+C3	WC	WCGU	XCons	YCons	DfDel	PNuc	Seq
T	159	163	53	0.33	0.54	0.66	1.2	0.66	0.87	-0.89	-0.89	0	0.26	6626
3	149	152	47	0.31	0.54	0.65	1.19	0.65	0.86	-0.93	-0.92	0.01	0.29	5641
B	146	151	47	0.32	0.53	0.65	1.18	0.65	0.86	-0.95	-0.95	0.01	0.35	4420
A	3	1	0	0	0.53	0.78	1.31	0.78	0.97	-0.65	-0.53	0.01	0.14	201
C	9	9	6	0.67	0.78	0.89	1.67	0.89	0.95	-0.8	-0.74	0.03	0.34	164
E	0	0	0	0	0	0	0	0	0	-0.01	0	0	0	1020
M	1	2	0	0	0.02	0	0.02	0.04	0.07	-0.31	-0.37	0	0	830
Helix 6	Base Pair (78:91)		BPC: cWW	AI: --	Strong
Frequency
Aln	GC	CG	UA	AU	GU	UG	AA	AC	AG	CA	CC	CU	GA	GG	UC	UU	gap	Seq
T	7.4*	6.4*	7.2*	10.9*	3.8	2	0.2	0.2	1.6	--	--	0.1	1.1	0.2	0.1	0.2	58.6	6638
3	8.6*	7.4*	7.5*	12.5*	3.9	2.4	0.1	0.2	1.9	--	0.1	0.1	1.3	0.2	0.1	0.2	53.6	5652
B	10.7*	8.4*	9.5*	15.9*	5	2.9	0.2	0.2	2.4	--	0.1	0.1	1.6	0.3	0.1	0.3	42.3	4430
A	5.0*	23.8*	1.0*	2.5*	--	1.5	--	--	--	--	--	--	0.5	1	--	--	64.9	202
C	3	1.8*	17.6*	5.5	9.1*	1.2	0.6	--	0.6	--	--	0.6	--	--	0.6	--	59.4	165
E	--	--	--	--	--	--	--	--	--	--	--	--	--	--	--	--	100	1020
M	--	--	3.1*	0.8	1.8*	--	0.5	--	--	--	--	--	--	0.1	--	0.1	93.4	830
Collective Score
Aln	Xch	Ych	PE	PES	Cov1	Cov3	C1+C3	WC	WCGU	XCons	YCons	DfDel	PNuc	Seq
T	197	184	87	0.46	0.69	0.77	1.46	0.77	0.91	-0.96	-0.96	0.01	0.32	6638
3	188	175	83	0.46	0.69	0.78	1.47	0.78	0.91	-0.98	-0.97	0	0.37	5652
B	184	170	79	0.45	0.68	0.77	1.46	0.77	0.91	-0.94	-0.95	0	0.44	4430
A	4	5	4	0.89	0.74	0.92	1.66	0.92	0.96	-0.72	-0.65	0.01	0.27	202
C	7	8	4	0.53	0.47	0.7	1.18	0.69	0.94	-0.85	-0.84	0.02	0.37	165
E	0	0	0	0	0	0	0	0	0	-0.01	0	0	0	1020
M	2	1	0	0	0.02	0	0.02	0.04	0.06	-0.31	-0.35	0	0	830
Helix 6	Base Pair (79:90)		BPC: cWW	AI: --	Strong
Frequency
Aln	GC	CG	UA	AU	GU	UG	AA	AC	AG	CA	CC	CU	GA	GG	UC	UU	gap	Seq
T	14.1*	12.0*	6.9*	9.0*	7	2.1	0.5	0.2	0.8	0.1	0.1	0.1	0.2	0.3	--	0.3	46.3	6648
3	16.5*	13.8*	7.4*	9.7*	8.2	2.4	0.6	0.2	0.9	0.1	0.1	0.1	0.2	0.1	--	0.3	39.5	5662
B	20.8*	16.9*	8.9*	12.3*	10.4	2.8	0.8	0.3	1.2	0.1	0.1	0.1	0.2	0.1	--	0.4	24.5	4439
A	3.9*	15.8*	11.3*	1.5*	--	5.4	--	--	--	--	--	--	--	--	--	--	62.1	203
C	3.6*	10.3*	7.9*	30.9*	2.4	3	0.6	--	--	0.6	--	--	0.6	0.6	--	--	39.4	165
E	--	--	--	--	--	--	--	--	--	--	--	--	--	--	--	--	100	1020
M	--	0.1	3.0*	0.4*	--	--	--	--	0.4	--	--	--	0.1	1.8*	--	0.1	94.1	830
Collective Score
Aln	Xch	Ych	PE	PES	Cov1	Cov3	C1+C3	WC	WCGU	XCons	YCons	DfDel	PNuc	Seq
T	243	240	128	0.53	0.7	0.78	1.49	0.78	0.95	-0.95	-0.96	0.01	0.42	6648
3	226	225	120	0.53	0.7	0.78	1.48	0.78	0.96	-0.9	-0.93	0.01	0.48	5662
B	218	220	116	0.53	0.7	0.78	1.48	0.78	0.96	-0.7	-0.74	0.01	0.57	4439
A	8	5	4	0.61	0.76	0.86	1.61	0.86	1	-0.84	-0.78	0.01	0.29	203
C	15	14	7	0.48	0.73	0.87	1.6	0.87	0.96	-0.81	-0.69	0.02	0.55	165
E	0	0	0	0	0	0	0	0	0	-0.01	0	0	0	1020
M	2	1	1	0.67	0.02	0	0.02	0.04	0.04	-0.29	-0.31	0	0	830
Helix 6	Base Pair (80:89)		BPC: cWW	AI: --	Strong
Frequency
Aln	GC	CG	UA	AU	GU	UG	AA	AC	AG	CA	CC	CU	GA	GG	UC	UU	gap	Seq
T	22.6*	13.8*	12.7*	9.8*	3.5	0.9	0.1	0.2	0.8	0.1	--	0.1	0.3	0.2	--	0.2	34.7	6611
3	26.0*	16.0*	14.5*	10.0*	4.1	1	0.1	0.2	1	0.1	--	0.1	--	0.2	--	0.2	26.5	5625
B	32.5*	18.9*	18.1*	12.1*	5.2	1.2	0.1	0.3	1.2	0.1	--	0.1	--	0.2	--	0.2	9.7	4409
A	15.3*	35.2*	9.7*	16.3*	--	1.5	--	--	--	--	--	--	--	--	--	--	21.9	196
C	18.2*	8.5*	12.7*	50.3*	0.6	1.2	--	1.8	--	--	--	--	--	--	0.6	0.6	5.5	165
E	--	--	--	--	--	--	--	--	--	--	--	--	--	--	--	--	100	1020
M	0.1	--	0.4	0.1	--	--	0.2	0.1	--	0.4	0.1*	--	1.8*	--	--	0.4*	96.4	830
Collective Score
Aln	Xch	Ych	PE	PES	Cov1	Cov3	C1+C3	WC	WCGU	XCons	YCons	DfDel	PNuc	Seq
T	281	291	195	0.68	0.85	0.9	1.75	0.9	0.97	-0.87	-0.9	0.01	0.51	6611
3	263	272	179	0.67	0.85	0.91	1.76	0.91	0.97	-0.74	-0.78	0	0.58	5625
B	254	264	172	0.66	0.85	0.9	1.75	0.9	0.97	-0.33	-0.38	0	0.68	4409
A	9	8	7	0.82	0.96	0.98	1.95	0.98	1	-0.62	-0.65	0.02	0.58	196
C	17	18	16	0.91	0.89	0.95	1.84	0.95	0.97	0	-0.08	0.02	0.86	165
E	0	0	0	0	0	0	0	0	0	-0.01	0	0	0	1020
M	1	1	0	0	0.01	0	0.01	0.01	0.01	-0.25	-0.21	0	0	830
Helix 6	Base Pair (81:88)		BPC: cWW	AI: --	Strong
Frequency
Aln	GC	CG	UA	AU	GU	UG	AA	AC	AG	CA	CC	CU	GA	GG	UC	UU	gap	Seq
T	7.1*	18.1*	17.2*	24.3*	2.5	1	0.1	0.2	0.2	0.1	0.1	--	0.1	--	--	0.1	28.8	6644
3	8.1*	20.9*	19.2*	27.7*	2.5	0.9	--	0.1	0.1	0.1	0.1	--	0.1	0.1	--	0.1	19.9	5658
B	8.3*	25.7*	23.5*	34.9*	3.2	1.2	--	0.1	0.2	0.1	0.1	--	0.1	0.1	--	0.1	2.3	4440
A	44.4*	22.2*	22.7*	8.1*	1	--	--	--	--	--	--	--	--	--	0.5	--	1	198
C	9.1*	9.1*	33.3*	23.6*	13.9	7.3	--	--	--	--	--	--	1.8	--	--	--	1.8	165
E	--	--	--	--	--	--	--	--	--	--	--	--	--	--	--	--	100	1020
M	0.1*	--	0.1	1.1*	0.1	--	0.4	0.6	0.5	0.4*	--	--	--	--	--	0.4	96.4	830
Collective Score
Aln	Xch	Ych	PE	PES	Cov1	Cov3	C1+C3	WC	WCGU	XCons	YCons	DfDel	PNuc	Seq
T	264	263	201	0.76	0.91	0.94	1.85	0.94	0.99	-0.82	-0.77	0.01	0.55	6644
3	242	244	192	0.79	0.92	0.95	1.87	0.95	0.99	-0.65	-0.6	0	0.63	5658
B	230	231	182	0.79	0.92	0.95	1.87	0.95	0.99	-0.06	0.04	0.01	0.74	4440
A	12	13	10	0.8	0.97	0.98	1.96	0.98	0.99	0.14	0.13	0	0.74	198
C	20	17	9	0.49	0.65	0.77	1.41	0.77	0.98	0.03	0.04	0	0.89	165
E	0	0	0	0	0	0	0	0	0	-0.01	0	0	0	1020
M	2	2	0	0	0.01	0	0.01	0.01	0.01	-0.21	-0.23	0	0	830
Helix 6	Base Pair (82:87)		BPC: cWW	AI: --	Strong
Frequency
Aln	GC	CG	UA	AU	GU	UG	AA	AC	AG	CA	CC	CU	GA	GG	UC	UU	gap	Seq
T	28.8*	26.5*	2.8*	9.0*	0.5	3.3	0.1	--	0.1	0.1	0.1	--	0.4	--	--	0.2	28.1	6676
3	33.6*	30.5*	2.4*	10.0*	0.2	3.4	0.1	--	0.1	0.1	0.1	--	0.2	--	--	0.1	19.1	5690
B	42.2*	36.8*	1.9*	12.3*	0.3	4.2	0.1	--	0.1	--	0.1	--	0.2	--	--	0.1	1.4	4468
A	11.9*	45.0*	26.7*	10.4*	--	4	--	--	--	2	--	--	--	--	--	--	--	202
C	7.3*	21.2*	29.1*	13.3*	10.9	14.5	0.6	--	--	--	--	--	--	--	--	1.2	1.8	165
E	--	--	--	--	--	--	--	--	--	--	--	--	--	--	--	--	100	1020
M	--	0.1*	0.5	0.6*	--	0.1	--	--	0.1	0.1	--	--	1.7*	0.1	--	0.4	96.2	830
Collective Score
Aln	Xch	Ych	PE	PES	Cov1	Cov3	C1+C3	WC	WCGU	XCons	YCons	DfDel	PNuc	Seq
T	232	196	152	0.71	0.89	0.94	1.83	0.94	0.99	-0.68	-0.59	0.01	0.56	6676
3	209	173	136	0.71	0.91	0.95	1.85	0.95	0.99	-0.46	-0.36	0	0.64	5690
B	193	158	122	0.69	0.91	0.95	1.85	0.95	0.99	0.21	0.37	0	0.75	4468
A	16	15	14	0.9	0.89	0.94	1.83	0.94	0.98	0.26	0.27	0	0.77	202
C	20	21	15	0.73	0.6	0.72	1.33	0.72	0.98	0.05	0.04	0.01	0.89	165
E	0	0	0	0	0	0	0	0	0	-0.01	0	0	0	1020
M	3	2	1	0.4	0.01	0	0.01	0.01	0.01	-0.22	-0.21	0	0	830
Helix 6.1	Base Pair (113:314)		BPC: cWW	AI: --	Strong
Frequency
Aln	GC	CG	UA	AU	GU	UG	AA	AC	AG	CA	CC	CU	GA	GG	UC	UU	gap	Seq
T	81.3*	17.9*	--	--	--	--	--	--	--	--	--	0.1	--	0.1	--	--	0.3	6916
3	78.8*	20.9*	--	--	--	--	--	--	--	--	--	0.1	--	0.1	--	--	0.1	5931
B	99.0*	0.7*	--	--	--	--	--	--	--	--	--	--	--	--	--	--	0.1	4720
A	--	97.5	--	--	--	--	--	--	--	--	--	2.5	--	--	--	--	--	203
C	99.4*	0.6*	--	--	--	--	--	--	--	--	--	--	--	--	--	--	--	164
E	--	99.6	--	--	--	--	--	--	--	--	--	--	--	0.3	--	--	0.1	1008
M	95.2*	0.1*	0.1	--	0.2	--	0.1*	0.1	0.1	--	--	--	0.1	--	--	0.6*	3.2	830
Collective Score
Aln	Xch	Ych	PE	PES	Cov1	Cov3	C1+C3	WC	WCGU	XCons	YCons	DfDel	PNuc	Seq
T	11	8	7	0.74	0.98	1	1.98	1	1	1.26	1.27	0	0.81	6916
3	9	6	6	0.8	0.99	1	1.99	1	1	1.23	1.26	0	0.82	5931
B	5	4	4	0.89	0.83	1	1.83	1	1	1.9	1.92	0	0.81	4720
A	0	0	0	0	0	0	0	0.97	0.97	2	1.85	0	0.77	203
C	1	1	1	1	1	1	2	1	1	1.95	1.95	0	0.9	164
E	4	2	2	0.67	0	0	0	1	1	1.96	2	0	0.95	1008
M	1	1	0	0	0.54	0.99	1.53	0.99	0.99	1.64	1.6	0.01	0.69	830
Helix 6.1	Base Pair (114:313)		BPC: cWW	AI: --	Strong
Frequency
Aln	GC	CG	UA	AU	GU	UG	AA	AC	AG	CA	CC	CU	GA	GG	UC	UU	gap	Seq
T	0.4*	0.1*	98.3*	0.3*	--	--	0.1	--	--	0.1	--	--	--	--	--	0.2	0.3	6906
3	0.5*	0.1*	98.6*	0.3*	--	0.1	--	--	--	0.1	--	--	--	--	--	0.1	0.1	5921
B	0.6*	0.1*	98.5*	0.4*	--	0.1	--	--	--	0.1	--	--	--	--	--	--	0.1	4704
A	--	--	97.5	--	--	--	--	--	--	--	--	--	--	--	--	2.5	--	204
C	--	--	99.4	--	--	--	0.6	--	--	--	--	--	--	--	--	--	--	164
E	--	--	99.6	--	--	--	0.1	--	--	0.1	--	--	0.1	--	--	--	0.1	1013
M	--	0.5*	94.7*	0.2*	0.1	--	0.2	--	--	0.1	--	--	0.1	--	--	1.2	2.7	830
Collective Score
Aln	Xch	Ych	PE	PES	Cov1	Cov3	C1+C3	WC	WCGU	XCons	YCons	DfDel	PNuc	Seq
T	11	9	9	0.9	0.65	0.99	1.64	0.99	1	1.85	1.86	0	0.81	6906
3	6	6	6	1	0.74	1	1.74	1	1	1.88	1.9	0	0.82	5921
B	5	6	6	1	0.83	1	1.83	1	1	1.86	1.88	0	0.8	4704
A	0	0	0	0	0	0	0	0.97	0.97	2	1.85	0	0.77	204
C	1	0	0	0	0	0	0	0.99	0.99	1.95	2	0	0.9	164
E	1	0	0	0	0	0	0	1	1	1.95	2	0	0.96	1013
M	4	3	3	0.86	0.29	0.98	1.27	0.98	0.98	1.67	1.6	0.01	0.7	830
Helix 6.1	Base Pair (115:312)		BPC: cWW	AI: --	Strong
Frequency
Aln	GC	CG	UA	AU	GU	UG	AA	AC	AG	CA	CC	CU	GA	GG	UC	UU	gap	Seq
T	81.1*	17.2*	0.7*	--	0.1	0.1	--	0.1	--	0.1	--	--	0.1	--	--	--	0.3	6856
3	78.5*	20.1*	0.8*	--	0.1	0.1	--	0.1	--	0.1	--	--	--	--	--	--	0.1	5871
B	98.1*	0.3*	1.0*	--	0.2	--	--	0.1	--	--	--	--	--	--	--	--	0.2	4659
A	18.2*	79.3*	--	--	--	--	--	--	--	2.5	--	--	--	--	--	--	--	203
C	99.4	--	--	--	--	--	--	--	--	--	0.6	--	--	--	--	--	--	164
E	--	99.3	--	--	--	0.3	--	--	--	--	--	0.2	--	0.1	--	--	0.1	1009
M	94.9*	--	0.4*	0.2	0.2	0.1	--	0.1	0.2*	--	--	--	1	--	--	0.1	2.6	830
Collective Score
Aln	Xch	Ych	PE	PES	Cov1	Cov3	C1+C3	WC	WCGU	XCons	YCons	DfDel	PNuc	Seq
T	19	18	12	0.65	0.97	0.99	1.96	0.99	1	1.22	1.21	0	0.8	6856
3	16	17	12	0.73	0.98	0.99	1.97	0.99	1	1.18	1.19	0	0.82	5871
B	8	11	7	0.74	0.79	1	1.78	1	1	1.85	1.84	0	0.79	4659
A	3	3	3	1	0.88	0.97	1.86	0.97	0.97	1.31	1.2	0	0.77	203
C	1	0	0	0	0	0	0	0.99	0.99	1.95	2	0	0.9	164
E	5	3	2	0.5	0	0	0	0.99	1	1.95	1.98	0	0.96	1009
M	2	1	0	0	0.25	0.98	1.23	0.98	0.98	1.69	1.58	0.01	0.7	830
Helix 7	Base Pair (122:239)		BPC: cWW	AI: --	Strong
Frequency
Aln	GC	CG	UA	AU	GU	UG	AA	AC	AG	CA	CC	CU	GA	GG	UC	UU	gap	Seq
T	8.9	--	1.2	8.9	35.7*	0.1	4.7	5	26.2*	0.1*	0.5	0.1	0.1	0.2	7.6*	--	0.5	6923
3	0.3	--	0.3	9.3	39.0*	--	5.4	5.2	30.1*	0.1*	0.5	0.2	0.2	0.2	8.9*	--	0.2	5935
B	0.3	--	--	11.5	49.1*	--	0.7	4.1	33.6*	--	--	0.2	0.1	0.1	--	--	0.2	4717
A	--	--	--	4.4	--	--	--	5.4	87.7*	--	--	--	0.5*	2	--	--	--	204
C	0.6	--	--	18.5	56.0*	--	--	11.3	13.1*	--	--	--	--	--	--	--	0.6	168
E	0.8	--	1.9	--	0.2*	--	28.0*	10.6	2.2	0.7	3.2	--	0.6	0.1	51.8*	--	0.1	1014
M	71.9*	--	7.4*	4.2*	7.5	0.4	1.2	2.2	0.5	0.1	--	0.1	--	0.1	--	0.1	4.3	829
Collective Score
Aln	Xch	Ych	PE	PES	Cov1	Cov3	C1+C3	WC	WCGU	XCons	YCons	DfDel	PNuc	Seq
T	144	141	37	0.26	0.53	0.7	1.23	0.19	0.55	0.55	0.21	0	0.81	6923
3	105	89	20	0.21	0.64	0.78	1.43	0.1	0.49	0.57	0.32	0	0.82	5935
B	85	75	16	0.2	0.67	0.83	1.49	0.12	0.61	0.95	0.76	0	0.8	4717
A	1	5	0	0	0.04	0	0.04	0.04	0.04	1.83	1.4	0	0.77	204
C	12	11	3	0.26	0.3	0.69	1	0.19	0.75	1.01	0.87	0.01	0.92	168
E	19	9	4	0.29	0.59	0.8	1.39	0.03	0.03	0.7	0.94	0	0.96	1014
M	27	41	14	0.41	0.49	0.87	1.36	0.87	0.95	0.85	0.66	0	0.68	829
Helix 7	Base Pair (123:238)		BPC: cWW	AI: --	Strong
Frequency
Aln	GC	CG	UA	AU	GU	UG	AA	AC	AG	CA	CC	CU	GA	GG	UC	UU	gap	Seq
T	0.1*	92.0*	5.4*	0.7*	0.2	0.1	0.1	--	--	0.3	--	0.1	0.1	0.2	--	--	0.5	6977
3	0.1	93.0*	5.7*	0.1	0.2*	0.2	0.1	--	--	--	0.1	0.1	--	0.3	--	--	0.2	5989
B	0.1	91.9*	7.1*	--	0.2*	0.2	--	--	--	--	0.1	--	--	0.1	--	--	0.2	4769
A	--	99.5*	0.5*	--	--	--	--	--	--	--	--	--	--	--	--	--	--	206
C	--	92.8*	6.0*	0.6*	--	--	--	--	--	--	--	--	--	--	--	--	0.6	167
E	0.2*	96.6*	0.3*	0.5*	--	--	0.3	--	--	--	--	0.4	0.2	1.3	--	--	0.2	1014
M	0.5*	84.0*	2.8*	4.7*	0.5	0.1	0.5	0.1	--	2.2	--	--	0.2	--	--	0.1	4.3	830
Collective Score
Aln	Xch	Ych	PE	PES	Cov1	Cov3	C1+C3	WC	WCGU	XCons	YCons	DfDel	PNuc	Seq
T	63	65	54	0.84	0.84	0.99	1.82	0.99	0.99	1.51	1.53	0	0.81	6977
3	35	38	32	0.88	0.86	0.99	1.85	0.99	0.99	1.58	1.62	0	0.83	5989
B	29	33	27	0.87	0.93	0.99	1.92	0.99	1	1.55	1.58	0	0.81	4769
A	0	0	0	0	1	1	2	1	1	1.96	1.96	0	0.78	206
C	5	4	4	0.89	1	1	2	1	1	1.58	1.56	0.01	0.91	167
E	6	5	5	0.91	0.31	0.98	1.29	0.98	0.98	1.76	1.83	0	0.96	1014
M	23	23	18	0.78	0.68	0.96	1.64	0.96	0.97	1.08	1	0	0.68	830
Helix 7	Base Pair (124:237)		BPC: cWW	AI: B,R	Strong
Frequency
Aln	GC	CG	UA	AU	GU	UG	AA	AC	AG	CA	CC	CU	GA	GG	UC	UU	gap	Seq
T	57.3*	14.9*	3.1*	23.0*	0.2	0.1	--	0.1	--	--	--	0.1	0.1	--	--	0.4	0.5	6975
3	63.8*	5.8*	3.4*	26.2*	0.2	0.1	--	0.1	--	--	--	0.1	0.1	--	--	0.1	0.2	5987
B	75.6*	7.2*	3.5*	12.8*	0.2	0.1	--	--	--	--	--	0.1	0.1	--	--	0.1	0.2	4767
A	99.0*	--	--	0.5*	0.5	--	--	--	--	--	--	--	--	--	--	--	--	206
C	92.8*	--	--	6.0*	--	--	--	--	--	--	--	--	--	--	--	--	1.2	167
E	1.3*	0.5*	3.3*	94.1*	0.5	--	--	0.2	--	--	--	0.1	--	--	--	--	0.1	1014
M	3.0*	82.8*	1.6*	3.5*	0.2	0.4	0.2	0.2	0.1	0.1	0.1	--	0.4	0.1	--	2.9	4.3	830
Collective Score
Aln	Xch	Ych	PE	PES	Cov1	Cov3	C1+C3	WC	WCGU	XCons	YCons	DfDel	PNuc	Seq
T	65	67	52	0.79	0.97	0.99	1.96	0.99	0.99	0.42	0.44	0	0.81	6975
3	40	44	37	0.88	0.98	0.99	1.98	0.99	1	0.64	0.66	0	0.83	5987
B	32	38	33	0.94	0.98	0.99	1.97	0.99	1	0.83	0.84	0	0.81	4767
A	1	1	0	0	0.5	0.99	1.5	0.99	1	1.96	1.93	0	0.78	206
C	7	6	6	0.92	1	1	2	1	1	1.62	1.56	0.01	0.91	167
E	7	5	4	0.67	0.86	0.99	1.86	0.99	1	1.6	1.64	0	0.96	1014
M	18	17	9	0.51	0.63	0.95	1.58	0.95	0.96	0.92	0.95	0	0.68	830
Helix 7	Base Pair (125:236)		BPC: cWW	AI: B,R	Strong
Frequency
Aln	GC	CG	UA	AU	GU	UG	AA	AC	AG	CA	CC	CU	GA	GG	UC	UU	gap	Seq
T	14.2*	10.2	18.4	0.5*	0.1	55.2*	0.1	0.3	--	0.1*	--	--	--	--	0.1	0.1	0.6	6897
3	16.4*	0.5	20.5	0.3*	--	61.6*	--	--	--	0.1*	--	--	--	--	0.1	0.1	0.3	5909
B	--	0.2	25.4	0.1*	--	73.6*	--	--	--	0.1*	--	--	--	--	0.1	0.1	0.2	4679
A	--	1.4	7.8	--	--	89.9	--	--	--	--	--	--	--	--	--	0.5	0.5	217
C	--	--	11.4	--	--	87.3	--	--	--	--	--	--	--	--	--	--	1.2	166
E	96.0*	1.6*	0.5*	1.3*	0.2	--	--	--	--	--	0.2	--	--	--	0.1	--	0.2	1013
M	0.8	81.2*	4.6*	1.7	0.5*	2.9	0.4	2.6*	0.1	0.2	--	--	0.1	0.2	--	0.1	4.4	831
Collective Score
Aln	Xch	Ych	PE	PES	Cov1	Cov3	C1+C3	WC	WCGU	XCons	YCons	DfDel	PNuc	Seq
T	35	82	20	0.34	0.33	0.7	1.04	0.44	0.99	0.84	0.65	0	0.81	6897
3	15	51	8	0.24	0.44	0.79	1.23	0.38	1	1.25	0.63	0	0.82	5909
B	6	42	3	0.12	0.01	0	0.01	0.26	1	1.92	1.12	0	0.8	4679
A	2	3	0	0	0	0	0	0.09	0.99	1.9	1.52	0	0.82	217
C	0	8	0	0	0	0	0	0.12	1	2	1.38	0.01	0.9	166
E	7	6	5	0.77	0.87	0.99	1.87	0.99	1	1.71	1.72	0	0.96	1013
M	20	23	12	0.56	0.54	0.93	1.47	0.92	0.96	0.88	1	0	0.68	831
Helix 7	Base Pair (126:235)		BPC: cWW	AI: --	Strong
Frequency
Aln	GC	CG	UA	AU	GU	UG	AA	AC	AG	CA	CC	CU	GA	GG	UC	UU	gap	Seq
T	42.7*	5.5*	8.6*	21.4*	5.2	0.3	0.5	0.5	--	0.6	--	3	0.1	0.1	0.2	10.5	1	6969
3	48.8*	5.9*	0.2*	22.8*	5.6	0.1	0.3	--	--	--	--	3.5	0.1	0.1	0.1	12.1	0.4	5980
B	61.2*	6.7*	0.2*	27.8*	3.2	0.1	--	--	--	--	--	0.1	0.1	0.1	--	0.1	0.3	4751
A	5.5	5.1*	--	5.1	83.9*	--	--	--	--	--	--	--	--	--	--	--	0.5	217
C	29.3*	--	--	49.1*	2.4	--	--	18.6	--	--	--	--	--	--	--	--	0.6	167
E	0.1*	2.3*	0.5	2.9	0.1	--	1.7*	--	--	--	--	20.4	--	0.2	0.5	71.1*	0.3	1012
M	0.8*	3.4*	70.0*	5.9*	2.6	2.2	1.8	0.1	--	4.9	0.2	--	0.5	--	0.5	1.1	5.8	831
Collective Score
Aln	Xch	Ych	PE	PES	Cov1	Cov3	C1+C3	WC	WCGU	XCons	YCons	DfDel	PNuc	Seq
T	151	134	72	0.51	0.63	0.79	1.42	0.79	0.84	0.17	0.34	0	0.81	6969
3	93	84	58	0.66	0.57	0.78	1.35	0.78	0.84	0.32	0.68	0	0.83	5980
B	75	74	54	0.72	0.9	0.96	1.86	0.96	0.99	0.75	0.74	0	0.81	4751
A	5	4	2	0.44	0.32	0.89	1.22	0.16	1	1.43	1.3	0	0.82	217
C	6	9	4	0.53	0.58	0.79	1.37	0.79	0.81	1.1	0.94	0.01	0.91	167
E	13	6	2	0.21	0.14	0	0.14	0.06	0.06	0.92	1.61	0	0.96	1012
M	52	41	10	0.21	0.42	0.85	1.27	0.85	0.9	0.55	0.78	0.01	0.67	831
Helix 7	Base Pair (127:234)		BPC: cWW	AI: --	Strong
Frequency
Aln	GC	CG	UA	AU	GU	UG	AA	AC	AG	CA	CC	CU	GA	GG	UC	UU	gap	Seq
T	55.8*	2.4*	8.5*	13.1*	1.8	3.6	0.8	0.2	0.1	2	0.4	0.2	0.1	0.2	0.1	9.5	0.9	6995
3	64.4*	1.7*	4.3*	12.1*	2	3.2	--	0.1	--	0.3	--	0.1	--	0.2	0.1	11	0.3	6006
B	76.3*	1.5*	4.5*	13.8*	2.3	0.7	--	0.1	--	--	--	--	--	0.2	--	--	0.5	4777
A	96.8*	3.2*	--	--	--	--	--	--	--	--	--	--	--	--	--	--	--	216
C	1.2*	--	--	97.6*	0.6	--	--	--	--	--	--	--	--	--	--	--	0.6	167
E	1.1*	2.6*	4.3	6.6	1.3	15.7	0.2*	--	0.1	1.9	--	0.5	--	0.1	0.3	65.2*	0.2	1013
M	4.6*	7.9*	40.8*	2.9*	0.8	7.3	6.5	0.6	0.2	14.9	3.4	0.7	0.7	0.1	0.5	0.6	7.4	831
Collective Score
Aln	Xch	Ych	PE	PES	Cov1	Cov3	C1+C3	WC	WCGU	XCons	YCons	DfDel	PNuc	Seq
T	155	147	63	0.42	0.56	0.81	1.37	0.81	0.86	0.38	0.37	0	0.81	6995
3	68	88	47	0.6	0.52	0.83	1.34	0.83	0.88	0.65	0.64	0	0.83	6006
B	49	72	43	0.71	0.85	0.97	1.82	0.97	1	1	0.91	0	0.81	4777
A	1	1	1	1	1	1	2	1	1	1.77	1.8	0	0.82	216
C	4	3	3	0.86	0.67	0.99	1.66	0.99	1	1.87	1.84	0.01	0.91	167
E	18	15	3	0.18	0.11	0	0.11	0.15	0.32	1.17	0.88	0	0.96	1013
M	83	56	13	0.19	0.3	0.61	0.9	0.61	0.69	0.02	0.28	0.01	0.66	831
Helix 7	Base Pair (128:233)		BPC: cWW	AI: --	Strong
Frequency
Aln	GC	CG	UA	AU	GU	UG	AA	AC	AG	CA	CC	CU	GA	GG	UC	UU	gap	Seq
T	61.6*	4.1*	4.0*	20.3*	0.6	0.7	1.4	1.4	0.3	0.8	0.4	0.2	0.4	0.4	0.9	0.6	2	6986
3	68.3*	4.7*	1.6*	22.2*	0.6	0.5	0.1	0.2	--	0.1	0.3	--	0.1	0.4	--	0.4	0.4	5997
B	85.0*	3.8*	0.9*	7.5*	0.4	0.6	--	0.1	--	--	0.3	--	0.1	0.5	--	--	0.5	4770
A	7.0*	44.1*	16.4*	31.5*	--	--	--	--	--	0.5	--	--	--	0.5	--	--	--	213
C	97.0*	--	--	1.8*	--	--	--	--	--	--	--	--	--	--	--	--	1.2	167
E	2.6*	0.2*	2.0*	89.6*	1.4	0.1	0.7	0.9	0.1	--	--	0.2	0.1	0.2	--	1.9	0.1	1014
M	5.8	1.2*	22.0*	9.7	1.1*	1.8	10.5	10.2*	2.2	6.4	1.3	1.1	2.6	0.2	7.7	2.2	13.9	831
Collective Score
Aln	Xch	Ych	PE	PES	Cov1	Cov3	C1+C3	WC	WCGU	XCons	YCons	DfDel	PNuc	Seq
T	183	148	78	0.47	0.78	0.92	1.7	0.92	0.93	0.53	0.52	0	0.81	6986
3	87	81	61	0.73	0.91	0.97	1.88	0.97	0.98	0.77	0.8	0	0.83	5997
B	62	63	48	0.77	0.84	0.98	1.82	0.98	0.99	1.2	1.22	0	0.81	4770
A	10	12	10	0.91	0.98	0.99	1.97	0.99	0.99	0.24	0.22	0	0.81	213
C	2	2	2	1	1	1	2	1	1	1.87	1.75	0.01	0.91	167
E	15	6	3	0.29	0.46	0.94	1.41	0.94	0.96	1.46	1.55	0	0.96	1014
M	94	65	15	0.19	0.2	0	0.2	0.45	0.48	-0.14	-0.28	0.04	0.62	831
Helix 7	Base Pair (129:232)		BPC: cWW	AI: B	Strong
Frequency
Aln	GC	CG	UA	AU	GU	UG	AA	AC	AG	CA	CC	CU	GA	GG	UC	UU	gap	Seq
T	1.4*	13.5	19.1*	2.7	0.4	22.5	2.5	2	29.0*	0.5	0.3	0.1*	1.9	0.3	0.4	0.7	2.5	6964
3	1.2*	15.7	21.8*	0.8	0.3	26.1	0.1	0.1	30.3*	0.2	0.1	--	1.9	0.2	0.1	--	1	5974
B	1.5*	17.8	11.5*	1	0.4	25.1	0.1	0.1	38.0*	0.2	0.2	--	2.4	0.3	0.1	--	1.2	4743
A	--	38.9	11.1	--	--	50	--	--	--	--	--	--	--	--	--	--	--	216
C	--	--	0.6*	4.8	--	1.8	--	--	91.0*	--	--	--	0.6	0.6	--	--	0.6	167
E	0.1	0.8*	72.3*	--	0.1*	25.7	0.1	--	0.4	--	--	--	0.1	0.1	--	0.2	0.1	1015
M	3.1*	0.5*	3	15.6	1	0.6	20.6*	16.7	7.5	2.6	1.6	0.8	2.2	0.6	3	5.3*	15.4	832
Collective Score
Aln	Xch	Ych	PE	PES	Cov1	Cov3	C1+C3	WC	WCGU	XCons	YCons	DfDel	PNuc	Seq
T	204	218	59	0.28	0.3	0.51	0.81	0.38	0.61	0.26	0.58	0.01	0.8	6964
3	130	111	47	0.39	0.34	0.54	0.88	0.4	0.67	0.33	0.94	0	0.82	5974
B	113	88	42	0.42	0.21	0.52	0.73	0.32	0.58	0.24	1.08	0	0.8	4743
A	11	6	2	0.23	0	0	0	0.5	1	1.04	1.49	0	0.82	216
C	6	6	1	0.17	0.07	0	0.07	0.05	0.07	1.75	1.57	0.01	0.91	167
E	6	17	3	0.26	0.03	0	0.03	0.73	0.99	1.84	1.12	0	0.96	1015
M	68	101	11	0.13	0.14	0	0.14	0.26	0.28	0.3	-0.49	0.04	0.61	832
Helix 7	Base Pair (131:231)		BPC: cWW	AI: --	Strong
Frequency
Aln	GC	CG	UA	AU	GU	UG	AA	AC	AG	CA	CC	CU	GA	GG	UC	UU	gap	Seq
T	1.2*	39.9*	44.7*	5.4*	0.5	3.5	0.7	0.5	0.1	0.6	0.4	0.3	0.3	0.1	0.2	0.4	1.1	6998
3	0.2*	43.0*	48.4*	3.4*	0.1	4	--	--	--	0.1	0.1	0.1	--	--	--	0.2	0.3	6012
B	0.1*	50.5*	40.0*	3.4*	0.1	4.7	--	--	0.1	0.1	0.1	0.1	--	--	--	0.3	0.4	4782
A	2.8*	74.1*	5.1*	14.8*	--	2.8	--	--	--	--	0.5	--	--	--	--	--	--	216
C	--	50.6*	48.2*	--	--	--	--	--	--	--	--	--	--	0.6	--	--	0.6	166
E	--	0.9*	97.2*	0.8*	--	0.6	--	--	--	0.1	--	0.1	0.2	--	--	--	0.1	1014
M	9.3*	14.4*	17.1*	21.2*	3.9	1.2	5.4	4.2	0.8	4.3	2.7	1.8	2.1	0.4	1.2	1.9	8	829
Collective Score
Aln	Xch	Ych	PE	PES	Cov1	Cov3	C1+C3	WC	WCGU	XCons	YCons	DfDel	PNuc	Seq
T	214	222	127	0.58	0.86	0.92	1.78	0.92	0.96	0.51	0.5	0	0.81	6998
3	108	114	92	0.83	0.91	0.95	1.86	0.95	0.99	0.77	0.75	0	0.83	6012
B	96	104	85	0.85	0.89	0.94	1.83	0.94	0.99	0.77	0.76	0	0.81	4782
A	7	6	3	0.46	0.88	0.97	1.84	0.97	0.99	0.84	0.93	0	0.82	216
C	7	7	7	1	0.99	0.99	1.98	0.99	0.99	0.95	0.94	0.01	0.91	166
E	5	4	4	0.89	0.63	0.99	1.62	0.99	1	1.81	1.82	0	0.96	1014
M	99	101	28	0.28	0.58	0.68	1.25	0.68	0.73	-0.33	-0.31	0	0.66	829
Helix 7	Base Pair (132:230)		BPC: cWW	AI: --	Strong
Frequency
Aln	GC	CG	UA	AU	GU	UG	AA	AC	AG	CA	CC	CU	GA	GG	UC	UU	gap	Seq
T	9.9*	63.1*	20.2*	3.3*	0.1	1	0.2	--	0.1	0.5	--	0.1	--	--	--	0.1	1.2	6974
3	11.4*	65.3*	17.9*	3.6*	0.1	0.8	--	--	0.1	0.1	--	0.1	--	0.1	--	--	0.4	5986
B	14.2*	76.5*	3.4*	4.3*	0.1	0.5	--	--	--	0.1	--	0.1	--	0.1	--	--	0.5	4755
A	--	93.1*	2.8*	3.2*	--	--	--	--	0.5	0.5	--	--	--	--	--	--	--	216
C	0.6*	83.7*	12.0*	0.6*	--	1.8	0.6	--	--	--	--	--	--	--	--	--	0.6	166
E	0.3*	7.0*	89.2*	0.2*	--	2.7	0.1	--	0.2	0.2	--	--	--	--	0.1	--	0.1	1015
M	1.4*	42.2*	38.1*	1.6*	0.1	2	1.4	0.1	--	3.5	--	0.1	0.2	--	--	0.5	8.5	831
Collective Score
Aln	Xch	Ych	PE	PES	Cov1	Cov3	C1+C3	WC	WCGU	XCons	YCons	DfDel	PNuc	Seq
T	160	154	112	0.71	0.94	0.98	1.92	0.98	0.99	0.53	0.53	0	0.81	6974
3	80	86	70	0.84	0.96	0.99	1.95	0.99	1	0.6	0.6	0	0.83	5986
B	67	68	60	0.89	0.96	0.99	1.95	0.99	1	0.9	0.9	0	0.81	4755
A	4	5	4	0.89	0.87	0.99	1.86	0.99	0.99	1.59	1.6	0	0.82	216
C	12	9	7	0.67	0.85	0.98	1.82	0.98	0.99	1.27	1.27	0.01	0.91	166
E	9	13	6	0.55	0.7	0.97	1.67	0.97	0.99	1.54	1.47	0	0.96	1015
M	68	59	35	0.55	0.84	0.91	1.75	0.91	0.94	0.26	0.29	0	0.66	831
Helix 7	Base Pair (136:227)		BPC: cWW	AI: --	Strong
Frequency
Aln	GC	CG	UA	AU	GU	UG	AA	AC	AG	CA	CC	CU	GA	GG	UC	UU	gap	Seq
T	0.2*	73.7*	1.7	0.2	--	0.2	--	--	--	0.2	--	0.1	--	0.1	--	12.6*	10.9	6934
3	0.1*	82.0*	1.9	0.2	--	0.2	--	--	--	0.2	--	0.1	--	0.1	0.1	14.7*	0.6	5943
B	--	98.4*	0.6*	--	--	0.2	--	--	--	0.3	--	0.1	--	--	--	--	0.5	4743
A	--	99.5	--	--	--	--	--	--	--	--	--	--	--	--	--	--	0.5	188
C	3.6*	88.0*	4.2*	0.6*	--	0.6	1.8	--	--	0.6	--	0.6	--	--	--	--	--	167
E	0.7*	2.4*	8.3	0.9	--	0.1	--	--	--	--	--	0.1	--	0.3	0.3	86.3*	0.7	1013
M	--	10.3*	--	0.2*	--	--	--	--	--	0.1	--	--	0.2*	0.1	--	--	88.9	832
Collective Score
Aln	Xch	Ych	PE	PES	Cov1	Cov3	C1+C3	WC	WCGU	XCons	YCons	DfDel	PNuc	Seq
T	23	76	16	0.32	0.84	0.97	1.81	0.85	0.85	0.69	1.04	0.08	0.72	6934
3	12	16	7	0.5	0.85	0.97	1.82	0.85	0.85	1.29	1.19	0	0.82	5943
B	6	7	5	0.77	0.5	0.99	1.49	0.99	1	1.91	1.87	0	0.81	4743
A	0	0	0	0	0	0	0	1	1	1.95	2	0	0.71	188
C	8	9	7	0.82	0.7	0.96	1.66	0.96	0.97	1.34	1.34	0	0.92	167
E	6	9	2	0.27	0.23	0.9	1.13	0.12	0.12	1.63	1.28	0	0.95	1013
M	3	51	2	0.07	0.01	0	0.01	0.11	0.11	-0.33	0.48	0	0	832
Helix 7	Base Pair (137:226)		BPC: cWW	AI: --	Strong
Frequency
Aln	GC	CG	UA	AU	GU	UG	AA	AC	AG	CA	CC	CU	GA	GG	UC	UU	gap	Seq
T	1.8*	44.3*	36.1*	2.2*	1.2	2.3	--	--	0.1	0.3	--	--	--	--	--	0.4	11.2	6935
3	2.1*	49.9*	40.1*	2.5*	1.1	2.7	0.1	--	0.1	0.4	--	0.1	--	--	--	0.4	0.6	5944
B	1.8*	53.9*	38.3*	0.4*	0.6	3.3	0.1	--	0.1	0.3	--	--	--	--	--	0.4	0.6	4737
A	--	98.5	--	--	--	0.5	--	--	--	1	--	--	--	--	--	--	--	203
C	--	58.1*	38.3*	0.6*	--	--	--	--	--	1.2	--	--	0.6	--	--	1.2	--	167
E	3.6*	21.2*	56.4*	12.9*	3.6	0.4	--	--	--	0.3	0.1	0.2	0.1	--	--	0.6	0.6	1005
M	0.1	1.0*	6.9*	0.2	2.2*	--	--	0.1*	0.1	0.1	--	--	--	0.2	--	--	89	832
Collective Score
Aln	Xch	Ych	PE	PES	Cov1	Cov3	C1+C3	WC	WCGU	XCons	YCons	DfDel	PNuc	Seq
T	194	243	145	0.66	0.9	0.95	1.85	0.95	0.99	0.11	0.31	0.05	0.72	6935
3	172	170	127	0.74	0.9	0.95	1.85	0.95	0.99	0.64	0.66	0	0.82	5944
B	155	154	116	0.75	0.89	0.95	1.84	0.95	0.99	0.77	0.79	0	0.8	4737
A	1	0	0	0	0	0	0	0.98	0.99	1.96	1.92	0	0.77	203
C	10	9	8	0.84	0.93	0.97	1.9	0.97	0.97	0.93	0.91	0	0.92	167
E	16	16	11	0.69	0.88	0.95	1.82	0.95	0.99	0.36	0.43	0	0.95	1005
M	12	64	10	0.26	0.04	0	0.04	0.08	0.1	-0.44	-0.83	0	0	832
Helix 7	Base Pair (138:225)		BPC: cWW	AI: --	Strong
Frequency
Aln	GC	CG	UA	AU	GU	UG	AA	AC	AG	CA	CC	CU	GA	GG	UC	UU	gap	Seq
T	20.5*	12.0*	30.6*	12.9*	0.4	7.9	0.1	--	0.2	0.2	0.1	0.3	0.1	0.1	0.1	3.6	10.8	6940
3	23.9*	13.8*	33.0*	14.3*	0.4	8.8	0.1	--	0.2	0.2	0.2	0.3	0.1	0.1	0.2	4.2	0.3	5949
B	10.5*	17.3*	36.4*	17.8*	0.5	11	0.1	--	0.1	0.2	0.1	0.1	--	0.1	0.2	5.2	0.4	4733
A	--	--	98.6	--	--	0.5	--	--	--	--	--	--	--	--	--	0.9	--	211
C	--	6.6*	69.5*	3.0*	--	17.4	--	--	--	1.8	--	--	--	--	--	1.8	--	167
E	92.2*	0.3	3.4*	0.5	0.2	0.1	--	0.1	0.5*	--	0.5	1.5*	0.4	0.1	0.1	--	0.1	1006
M	0.4*	0.4*	5.4*	4.8*	--	--	0.1	--	--	--	--	--	--	--	--	--	89	832
Collective Score
Aln	Xch	Ych	PE	PES	Cov1	Cov3	C1+C3	WC	WCGU	XCons	YCons	DfDel	PNuc	Seq
T	248	284	136	0.51	0.78	0.85	1.63	0.85	0.95	-0.31	-0.51	0.02	0.73	6940
3	228	252	121	0.5	0.78	0.85	1.63	0.85	0.94	0.17	0.01	0	0.82	5949
B	220	243	117	0.51	0.72	0.82	1.54	0.82	0.94	0.26	0.08	0	0.8	4733
A	0	1	0	0	0	0	0	0.99	0.99	2	1.88	0	0.8	211
C	11	17	6	0.43	0.31	0.79	1.1	0.79	0.96	1.4	0.92	0	0.92	167
E	8	8	4	0.5	0.7	0.98	1.68	0.96	0.97	1.52	1.54	0	0.95	1006
M	9	15	9	0.75	0.06	0	0.06	0.11	0.11	-0.43	-0.48	0	0	832
Helix 7	Base Pair (139:224)		BPC: cWW	AI: --	Strong
Frequency
Aln	GC	CG	UA	AU	GU	UG	AA	AC	AG	CA	CC	CU	GA	GG	UC	UU	gap	Seq
T	9.8*	6.2*	23.9*	27.5*	12	5.1	1.1	0.1	0.3	0.2	0.1	0.3	0.2	0.1	0.1	2.4	10.6	6986
3	11.4*	7.1*	25.7*	30.9*	13.9	5.3	1.3	0.2	0.3	0.3	0.1	0.3	0.2	0.2	0.1	2.7	0.2	5995
B	11.4*	7.1*	31.1*	20.5*	16.8	6.6	1.4	0.1	0.2	0.3	--	0.4	0.3	0.1	0.1	3.4	0.2	4768
A	9.4*	35.8*	25.5*	27.8*	--	0.5	0.5	--	0.5	--	--	--	--	--	--	--	--	212
C	--	3.6*	67.1*	1.8*	0.6	22.8	1.2	0.6	--	--	--	--	1.2	--	--	1.2	--	167
E	12.1*	1.3*	0.1*	80.3*	3.1	0.1	0.6	0.4	0.7	0.2	0.7	--	--	0.3	--	--	0.2	1016
M	0.4*	0.1*	2.0*	7.8*	0.2	--	--	--	--	--	--	--	--	--	--	0.5	88.9	832
Collective Score
Aln	Xch	Ych	PE	PES	Cov1	Cov3	C1+C3	WC	WCGU	XCons	YCons	DfDel	PNuc	Seq
T	299	301	155	0.52	0.65	0.75	1.4	0.75	0.94	-0.35	-0.34	0.02	0.73	6986
3	281	277	143	0.51	0.64	0.75	1.39	0.75	0.94	0.12	0.23	0	0.83	5995
B	247	243	116	0.47	0.57	0.7	1.27	0.7	0.94	0.16	0.18	0	0.81	4768
A	15	15	13	0.87	0.98	0.99	1.96	0.99	0.99	0.14	0.14	0	0.8	212
C	8	13	5	0.48	0.16	0	0.16	0.72	0.96	1.43	0.91	0	0.92	167
E	19	19	14	0.74	0.69	0.94	1.63	0.94	0.97	1.19	1.21	0	0.96	1016
M	10	11	7	0.67	0.03	0	0.03	0.1	0.11	-0.41	-0.35	0	0	832
Helix 7	Base Pair (140:223)		BPC: cWW	AI: --	Strong
Frequency
Aln	GC	CG	UA	AU	GU	UG	AA	AC	AG	CA	CC	CU	GA	GG	UC	UU	gap	Seq
T	8.5*	13.9*	32.8*	18.6*	5.1	4.1	0.4	0.1	0.1	0.4	0.1	0.1	0.3	0.3	0.4	3.8	10.7	6978
3	9.0*	15.7*	37.8*	19.7*	5.8	4.7	0.5	0.1	0.1	0.4	0.1	0.2	0.3	0.3	0.5	4.4	0.4	5987
B	8.0*	18.5*	36.1*	22.2*	7.2	5.5	0.6	0.1	0.1	0.1	--	0.2	0.3	0.3	0.1	0.4	0.3	4760
A	46.3*	8.4*	12.1*	25.7*	0.5	2.8	--	0.5	--	--	--	--	--	--	0.9	0.5	2.3	214
C	33.5*	6.0*	10.8*	39.5*	5.4	0.6	--	0.6	0.6	0.6	--	--	--	--	0.6	0.6	1.2	167
E	5.9*	3.7*	50.8*	7.0*	--	1.5	0.3	--	--	2.1	0.4	0.2	0.5	0.7	2.1	24.2	0.7	1014
M	0.1*	2.6*	1.6*	5.6*	0.5	0.1	--	0.1	--	0.1	--	--	--	0.1	--	0.1	88.9	832
Collective Score
Aln	Xch	Ych	PE	PES	Cov1	Cov3	C1+C3	WC	WCGU	XCons	YCons	DfDel	PNuc	Seq
T	295	310	186	0.61	0.73	0.83	1.56	0.83	0.93	-0.35	-0.43	0.02	0.73	6978
3	270	283	168	0.61	0.72	0.82	1.54	0.82	0.93	0.15	0.13	0	0.83	5987
B	237	240	146	0.61	0.77	0.85	1.62	0.85	0.98	0.09	0.14	0	0.81	4760
A	14	14	9	0.64	0.9	0.95	1.85	0.95	0.98	0.21	0.1	0.02	0.79	214
C	14	16	11	0.73	0.85	0.91	1.76	0.91	0.97	0.2	0.32	0.01	0.91	167
E	19	29	13	0.54	0.34	0.68	1.02	0.68	0.69	0.89	0.41	0	0.95	1014
M	11	11	7	0.64	0.05	0	0.05	0.1	0.11	-0.47	-0.4	0	0	832
Helix 7	Base Pair (141:222)		BPC: cWW	AI: --	Strong
Frequency
Aln	GC	CG	UA	AU	GU	UG	AA	AC	AG	CA	CC	CU	GA	GG	UC	UU	gap	Seq
T	24.1*	4.1*	3.4*	46.0*	1.6	2	0.8	0.9	1.9	0.4	1.4	0.4	0.6	0.7	0.1	0.7	10.7	7002
3	25.2*	4.8*	3.9*	52.4*	1.9	2.4	0.9	1.1	2.3	0.5	1.6	0.5	0.7	0.8	0.1	0.8	0.3	6012
B	22.1*	4.5*	4.5*	64.0*	0.3	2.9	0.1	0.1	--	0.1	--	0.1	--	0.1	--	0.7	0.3	4787
A	87.2*	--	--	10.0*	--	--	--	--	--	--	--	--	--	--	--	--	2.9	211
C	94.0*	0.6*	0.6*	3.6*	0.6	--	--	--	--	--	--	--	--	--	--	0.6	--	167
E	26.8*	6.9	1.8	6.3	9.7	0.4	5.1	5.7	13.3*	2.5*	9.6	2.4	3.8	4.3	0.3	1.1*	0.1	1015
M	1.4*	0.2*	0.6*	8.3*	0.2	--	--	--	--	--	--	0.1	--	--	--	0.1	88.9	831
Collective Score
Aln	Xch	Ych	PE	PES	Cov1	Cov3	C1+C3	WC	WCGU	XCons	YCons	DfDel	PNuc	Seq
T	166	170	125	0.74	0.73	0.87	1.6	0.87	0.91	-0.07	-0.17	0.02	0.73	7002
3	151	156	113	0.74	0.72	0.86	1.58	0.86	0.91	0.44	0.42	0	0.83	6012
B	122	119	102	0.85	0.87	0.95	1.83	0.95	0.99	0.57	0.61	0	0.81	4787
A	4	4	4	1	1	1	2	1	1	1.48	1.31	0.02	0.78	211
C	5	5	5	1	0.8	0.99	1.79	0.99	0.99	1.63	1.62	0	0.92	167
E	25	33	7	0.24	0.23	0.44	0.67	0.42	0.52	0.3	0.13	0	0.96	1015
M	10	9	7	0.74	0.03	0	0.03	0.11	0.11	-0.41	-0.35	0	0	831
Helix 7	Base Pair (142:221)		BPC: cWW	AI: --	Strong
Frequency
Aln	GC	CG	UA	AU	GU	UG	AA	AC	AG	CA	CC	CU	GA	GG	UC	UU	gap	Seq
T	49.7*	22.1*	0.7*	2.5*	0.7	1.4	1.1	0.4	0.9	0.1	0.1	0.1	0.6	8.7	0.1	0.1	11	7034
3	54.3*	25.7*	0.7*	2.5*	0.7	1.5	1.2	0.4	1	0.1	0.1	0.1	0.7	10.1	0.1	0.1	0.6	6043
B	63.7*	31.6*	0.4*	2.2*	0.7	0.2	0.1	0.1	--	--	0.1	0.1	0.2	0.1	0.1	--	0.5	4814
A	95.8*	2.3*	--	0.5*	--	--	--	--	--	--	--	--	--	0.9	--	--	0.5	216
C	92.2*	0.6*	1.2*	3.6*	0.6	0.6	--	0.6	--	--	--	--	--	--	0.6	--	--	167
E	0.6	2.7	2.4	4.6	1	8.4	6.8*	2.1	6.2	0.3	--	0.2	3.2	59.7*	--	0.4*	1.6	1014
M	7.6*	0.1*	0.2*	2.3*	0.2	0.1	0.2	--	0.1	--	--	0.1	--	--	--	--	88.9	832
Collective Score
Aln	Xch	Ych	PE	PES	Cov1	Cov3	C1+C3	WC	WCGU	XCons	YCons	DfDel	PNuc	Seq
T	120	125	82	0.67	0.64	0.84	1.49	0.84	0.86	0.18	0.04	0.02	0.74	7034
3	107	109	69	0.64	0.64	0.84	1.48	0.84	0.86	0.72	0.65	0	0.84	6043
B	66	75	57	0.81	0.95	0.98	1.94	0.98	0.99	0.87	0.82	0	0.82	4814
A	2	2	2	1	0.75	0.99	1.74	0.99	0.99	1.8	1.71	0	0.81	216
C	5	6	5	0.91	0.69	0.98	1.67	0.98	0.99	1.54	1.57	0	0.92	167
E	39	32	10	0.28	0.19	0	0.19	0.1	0.2	0.55	0.85	0	0.95	1014
M	8	10	8	0.89	0.03	0	0.03	0.1	0.11	-0.41	-0.37	0	0	832
Helix 8	Base Pair (144:178)		BPC: cWW	AI: --	Strong
Frequency
Aln	GC	CG	UA	AU	GU	UG	AA	AC	AG	CA	CC	CU	GA	GG	UC	UU	gap	Seq
T	30.6*	30.1*	6.9*	8.3*	0.2	10.6	0.1	0.1	0.4	0.2	--	0.1	0.1	0.3	0.1	0.1	11.6	6972
3	33.5*	34.9*	7.4*	8.9*	0.2	12.4	0.1	0.1	0.4	0.2	0.1	0.1	0.1	0.3	0.1	0.1	1.5	5980
B	40.4*	23.7*	8.9*	10.9*	0.2	14.5	0.1	0.1	--	--	0.1	--	0.1	0.1	0.1	0.1	0.5	4750
A	39.7*	46.3*	6.5*	5.1*	0.5	0.9	--	--	--	--	--	--	--	--	--	--	1	214
C	76.8*	3.6*	3.0*	8.3*	2.4	--	0.6	1.2	--	--	--	0.6	1.2	--	--	--	2.4	168
E	0.1*	85.1*	0.4*	0.2*	--	4.8	--	--	2.4	0.7	--	0.4	--	1.3	0.1	--	4.7	1017
M	0.4*	0.5*	4.4*	4.2*	--	0.1	0.2	--	--	0.2	--	0.1	0.1	--	--	0.2	89.3	832
Collective Score
Aln	Xch	Ych	PE	PES	Cov1	Cov3	C1+C3	WC	WCGU	XCons	YCons	DfDel	PNuc	Seq
T	214	188	120	0.6	0.79	0.86	1.65	0.86	0.98	-0.37	-0.22	0.01	0.72	6972
3	193	169	107	0.59	0.78	0.86	1.64	0.86	0.98	0.11	0.27	0.01	0.82	5980
B	163	146	89	0.58	0.74	0.84	1.58	0.84	0.99	0.1	0.23	0	0.81	4750
A	15	15	15	1	0.97	0.99	1.96	0.99	1	0.45	0.39	0.01	0.8	214
C	11	13	10	0.83	0.71	0.94	1.65	0.94	0.96	0.89	0.88	0.02	0.9	168
E	15	8	3	0.26	0.07	0	0.07	0.9	0.95	1.19	1.47	0.04	0.92	1017
M	10	6	3	0.38	0.05	0	0.05	0.1	0.1	-0.45	-0.43	0	0	832
Helix 8	Base Pair (145:177)		BPC: cWW	AI: B	Strong
Frequency
Aln	GC	CG	UA	AU	GU	UG	AA	AC	AG	CA	CC	CU	GA	GG	UC	UU	gap	Seq
T	8.1	17.8	1.9	6.8	0.3	15.1	0.3*	0.2	0.2	0.1	--	0.3	0.1	28.0*	--	9.4*	11.4	7032
3	7.4	20.3	2.1	6.6	0.3	17.5	0.3*	0.3	0.3	0.1	--	0.4	0.1	32.5*	--	11.0*	0.9	6040
B	6.7	24.1	2.4*	2.8*	0.2	21.8	0.1	0.1	0.3	0.1	--	0.1	0.1	40.8*	--	0.1	0.3	4809
A	55.1*	29.0*	2.8*	6.5*	--	5.6	--	--	--	0.9	--	--	--	--	--	--	--	214
C	72.6*	--	--	17.9*	1.8	--	0.6	0.6	--	--	--	--	0.6	3.6	--	--	2.4	168
E	0.3*	0.3*	0.1	24.8	1.2	--	1.3*	0.9	0.2	0.1	--	2	--	--	0.1	64.6*	4.3	1018
M	--	3.2*	1.0*	5.5*	0.1	0.6	--	--	--	--	--	0.1	--	--	--	0.2	89.1	832
Collective Score
Aln	Xch	Ych	PE	PES	Cov1	Cov3	C1+C3	WC	WCGU	XCons	YCons	DfDel	PNuc	Seq
T	211	148	61	0.34	0.16	0	0.16	0.39	0.56	-0.33	0.13	0	0.73	7032
3	193	120	48	0.31	0.17	0	0.17	0.37	0.55	0.15	0.7	0	0.83	6040
B	147	99	32	0.26	0.09	0	0.09	0.36	0.58	0.3	1.23	0	0.82	4809
A	18	14	12	0.75	0.85	0.94	1.79	0.94	0.99	0.45	0.56	0	0.81	214
C	9	16	7	0.56	0.71	0.93	1.64	0.93	0.94	1.09	0.91	0.02	0.9	168
E	28	7	4	0.23	0.06	0	0.06	0.27	0.28	0.74	1.45	0.03	0.93	1018
M	9	12	6	0.57	0.04	0	0.04	0.1	0.1	-0.45	-0.42	0	0	832
Helix 8	Base Pair (146:176)		BPC: cWW	AI: --	Strong
Frequency
Aln	GC	CG	UA	AU	GU	UG	AA	AC	AG	CA	CC	CU	GA	GG	UC	UU	gap	Seq
T	67.5*	4.4*	9.9*	3.5*	3	0.3	--	--	0.1	--	--	--	0.1	0.1	--	0.1	10.9	7057
3	75.7*	5.0*	11.4*	3.3*	3.1	0.4	--	--	0.1	--	--	--	0.1	0.1	--	0.1	0.4	6065
B	91.6*	0.4*	0.4*	2.9*	3.6	0.4	--	--	--	--	--	--	0.1	0.2	--	--	0.2	4836
A	71.6*	4.2*	2.8*	15.3*	4.2	1.9	--	--	--	--	--	--	--	--	--	--	--	215
C	81.0*	--	1.2*	14.3*	1.2	--	0.6	--	--	--	0.6	--	--	--	--	--	1.2	168
E	0.9*	27.0*	65.2*	2.8*	0.5	0.1	--	--	0.6	--	--	0.1	0.2	0.1	--	0.4	2.2	1015
M	4.1*	0.5*	0.6*	2.3*	2.6	0.2	0.1	--	0.1	--	--	--	0.2	--	--	--	89.1	832
Collective Score
Aln	Xch	Ych	PE	PES	Cov1	Cov3	C1+C3	WC	WCGU	XCons	YCons	DfDel	PNuc	Seq
T	76	101	55	0.62	0.82	0.96	1.78	0.96	0.99	0.38	0.25	0	0.74	7057
3	58	82	42	0.6	0.83	0.96	1.79	0.96	0.99	0.95	0.8	0	0.84	6065
B	34	56	23	0.51	0.46	0.96	1.42	0.96	1	1.67	1.5	0	0.82	4836
A	13	16	13	0.9	0.79	0.94	1.73	0.94	1	0.89	0.81	0	0.81	215
C	8	8	7	0.88	0.87	0.98	1.84	0.98	0.99	1.14	1.2	0.01	0.91	168
E	11	10	6	0.57	0.94	0.98	1.92	0.98	0.99	0.76	0.67	0.02	0.94	1015
M	10	11	6	0.57	0.04	0	0.04	0.07	0.1	-0.43	-0.46	0	0	832
Helix 8	Base Pair (147:175)		BPC: cWW	AI: --	Strong
Frequency
Aln	GC	CG	UA	AU	GU	UG	AA	AC	AG	CA	CC	CU	GA	GG	UC	UU	gap	Seq
T	87.1*	0.5*	0.2*	0.7*	0.3	--	0.1	--	0.1	--	--	--	--	--	--	--	10.8	7071
3	97.6*	0.6*	0.1*	0.7*	0.3	--	--	--	0.1	--	--	--	--	--	--	--	0.3	6079
B	98.7*	--	--	0.6*	0.2	--	--	--	--	--	--	--	0.1	--	--	--	0.3	4845
A	81.9*	10.2*	0.9*	4.6*	0.9	0.5	--	0.5	--	0.5	--	--	--	--	--	--	--	216
C	94.0*	--	0.6*	1.8*	1.2	--	1.8	--	--	--	--	--	--	--	--	--	0.6	168
E	95.6*	1.0*	0.2*	0.8*	0.6	--	--	--	0.5	--	0.1	0.1	--	--	--	0.1	1.1	1019
M	8.2*	0.2*	0.7*	0.5*	0.7	--	0.1	--	--	--	--	--	--	--	--	0.1	89.3	832
Collective Score
Aln	Xch	Ych	PE	PES	Cov1	Cov3	C1+C3	WC	WCGU	XCons	YCons	DfDel	PNuc	Seq
T	30	33	12	0.38	0.66	0.99	1.66	0.99	1	1.15	1.13	0	0.74	7071
3	19	21	9	0.45	0.69	0.99	1.69	0.99	1	1.82	1.8	0	0.84	6079
B	7	10	3	0.35	0.62	1	1.61	1	1	1.91	1.89	0	0.82	4845
A	8	7	5	0.67	0.87	0.98	1.85	0.98	0.99	1.13	1.11	0	0.82	216
C	3	3	0	0	0.33	0.96	1.3	0.97	0.98	1.66	1.58	0	0.92	168
E	4	4	1	0.25	0.59	0.99	1.57	0.99	0.99	1.69	1.66	0.01	0.96	1019
M	8	9	3	0.35	0.02	0	0.02	0.1	0.1	-0.38	-0.4	0	0	832
Helix 8	Base Pair (152:169)		BPC: tHW	AI: B	Strong
Frequency
Aln	GC	CG	UA	AU	GU	UG	AA	AC	AG	CA	CC	CU	GA	GG	UC	UU	gap	Seq
T	0.2	--	--	0.4	7.2*	0.2*	2.5	69.9*	0.4	0.1*	2.1	0.4	0.7	3.7	0.2	0.1	11.9	7096
3	0.2	--	--	0.4	8.4*	0.3*	2.8	78.7*	0.4	0.2*	2.5	0.5	0.8	4.3	0.3	0.1	0.3	6105
B	0.1	--	--	0.4	10.5*	0.3*	1.1	79.6*	0.2	0.1*	0.6	0.5	0.8	5.4	0.1	--	0.3	4869
A	--	--	--	0.5	--	--	47.9*	35.8	0.9	--	11.2*	2.3	--	--	--	1.4*	--	215
C	--	--	0.6*	3	--	--	1.8	89.9*	1.8	--	0.6	--	--	0.6*	--	--	1.8	168
E	0.4	--	--	0.1	--	0.2*	1.3	83.6*	1	0.6	9.8	--	0.9*	--	1.4	0.2	0.6	1021
M	--	--	0.1	--	0.1*	0.1*	0.2*	--	0.2	--	--	--	--	--	--	--	99.2	832
Collective Score
Aln	Xch	Ych	PE	PES	Cov1	Cov3	C1+C3	WC	WCGU	XCons	YCons	DfDel	PNuc	Seq
T	98	108	48	0.47	0.41	0.88	1.29	0.01	0.09	0.53	0.41	0	0.73	7096
3	95	103	47	0.47	0.42	0.88	1.3	0.01	0.09	1.15	1.02	0	0.85	6105
B	72	84	46	0.59	0.54	0.91	1.45	0.01	0.11	1.2	1.01	0	0.83	4869
A	7	13	1	0.1	0.24	0.6	0.85	0.01	0.01	1.33	0.73	0	0.81	215
C	2	5	1	0.29	0.14	0	0.14	0.04	0.04	1.73	1.32	0.01	0.91	168
E	16	6	0	0	0.07	0	0.07	0.01	0.01	1.26	1.66	0	0.96	1021
M	1	0	0	0	0	0	0	0	0	-0.13	-0.07	0	0	832
Helix 8	Base Pair (153:168)		BPC: cWW	AI: --	Strong
Frequency
Aln	GC	CG	UA	AU	GU	UG	AA	AC	AG	CA	CC	CU	GA	GG	UC	UU	gap	Seq
T	--	66.9*	1.1*	--	9.0*	0.5	0.1	--	--	9.7	0.2	0.3	--	0.1	--	0.1	12	7070
3	--	75.3*	1.2*	--	10.5*	0.5	0.1	--	--	11.2	0.2	0.3	--	0.1	--	0.1	0.3	6079
B	0.1	70.0*	1.4*	--	13.1*	0.2	--	--	--	13.8	0.2	0.4	--	--	--	0.1	0.5	4851
A	--	84.2*	--	1.4*	--	6.7	--	--	--	5.7	--	--	0.5*	--	1.4*	--	--	209
C	--	91.7*	0.6	--	--	1.8	0.6*	--	--	1.8	0.6	--	--	--	--	--	3	168
E	--	98.4*	0.3*	--	--	0.3	0.3	--	--	0.1	0.2	--	--	0.2	--	0.2	--	1019
M	--	--	0.4	--	--	--	0.1	--	--	--	--	--	--	--	--	--	99.4	832
Collective Score
Aln	Xch	Ych	PE	PES	Cov1	Cov3	C1+C3	WC	WCGU	XCons	YCons	DfDel	PNuc	Seq
T	48	81	23	0.36	0.48	0.87	1.35	0.77	0.88	0.69	0.32	0	0.73	7070
3	45	78	21	0.34	0.48	0.87	1.35	0.77	0.88	1.35	0.92	0	0.84	6079
B	33	68	17	0.34	0.49	0.85	1.34	0.72	0.85	1.28	0.78	0	0.82	4851
A	8	6	1	0.14	0.21	0.88	1.09	0.86	0.92	1.44	1.45	0	0.79	209
C	3	3	2	0.67	0.11	0	0.11	0.95	0.97	1.56	1.51	0.02	0.9	168
E	4	4	3	0.75	0.31	0.99	1.3	0.99	0.99	1.88	1.9	0	0.97	1019
M	0	0	0	0	0	0	0	0	0	-0.07	-0.04	0	0	832
Helix 8	Base Pair (154:167)		BPC: cWW	AI: --	Strong
Frequency
Aln	GC	CG	UA	AU	GU	UG	AA	AC	AG	CA	CC	CU	GA	GG	UC	UU	gap	Seq
T	5.3*	31.0*	20.4*	14.4*	2.6	3.3	0.1	0.1	0.1	8.9	--	0.1	0.1	0.1	--	1.4	11.7	7029
3	6.2*	36.0*	23.5*	14.7*	3	3.8	0.1	0.1	--	10.4	--	0.1	0.1	0.1	--	1.5	0.1	6038
B	7.6*	39.3*	22.8*	18.3*	3.7	4.8	0.1	0.1	0.1	0.5	0.1	0.1	0.1	0.1	0.1	1.9	0.1	4802
A	--	89.8*	5.6*	2.3*	--	--	--	--	--	--	--	--	--	--	--	1.9	0.5	216
C	1.2*	5.4*	9.5*	73.8*	1.2	--	1.2	--	1.2	--	--	0.6	--	--	--	4.8	1.2	168
E	0.6*	8.8	30.4	0.3*	--	0.1*	--	0.3	--	59.3*	--	--	0.1	--	--	--	0.1	1020
M	--	0.1*	0.1*	0.1*	--	--	--	--	--	--	--	--	--	--	--	--	99.5	832
Collective Score
Aln	Xch	Ych	PE	PES	Cov1	Cov3	C1+C3	WC	WCGU	XCons	YCons	DfDel	PNuc	Seq
T	217	220	129	0.59	0.7	0.81	1.51	0.81	0.88	-0.33	-0.33	0	0.73	7029
3	203	204	122	0.6	0.69	0.81	1.5	0.81	0.87	0.22	0.21	0	0.84	6038
B	184	188	111	0.6	0.81	0.88	1.69	0.88	0.97	0.12	0.18	0	0.82	4802
A	6	6	4	0.67	0.81	0.98	1.79	0.98	0.98	1.41	1.43	0	0.81	216
C	14	15	7	0.48	0.64	0.91	1.55	0.91	0.92	0.83	0.99	0.01	0.91	168
E	13	10	7	0.61	0.02	0	0.02	0.4	0.4	1	1.47	0	0.97	1020
M	0	1	0	0	0	0	0	0	0	-0.06	-0.05	0	0	832
Helix 8	Base Pair (155:166)		BPC: cWW	AI: --	Strong
Frequency
Aln	GC	CG	UA	AU	GU	UG	AA	AC	AG	CA	CC	CU	GA	GG	UC	UU	gap	Seq
T	10.0*	29.8*	13.5*	14.4*	2	4.6	0.1	0.1	0.1	0.5	0.1	0.1	--	12.5	0.1	0.3	11.8	7030
3	10.5*	34.6*	15.6*	16.0*	2	5.2	0.1	0.1	0.1	0.5	0.1	0.1	--	14.5	--	0.3	0.1	6041
B	12.9*	40.3*	17.4*	19.1*	1.8	6.6	0.1	0.1	0.1	0.6	--	0.1	--	0.1	--	0.3	0.2	4805
A	--	61.6*	36.1*	--	--	0.9	--	--	--	0.5	--	0.9	--	--	--	--	--	216
C	42.8*	1.2*	4.2*	26.5*	11.4	3	1.2	1.8	--	--	--	--	--	--	1.8	4.8	1.2	166
E	1.4	2.1	2.7*	4.8*	3.3	--	--	--	0.1	0.1	0.2*	--	--	85.3*	--	--	--	1020
M	--	--	0.5*	0.2*	0.1	0.1	--	--	--	--	--	--	--	--	--	--	99	832
Collective Score
Aln	Xch	Ych	PE	PES	Cov1	Cov3	C1+C3	WC	WCGU	XCons	YCons	DfDel	PNuc	Seq
T	235	229	131	0.56	0.65	0.77	1.42	0.77	0.84	-0.47	-0.28	0	0.73	7030
3	215	205	123	0.59	0.65	0.77	1.41	0.77	0.84	0.04	0.28	0	0.84	6041
B	203	191	116	0.59	0.83	0.9	1.73	0.9	0.98	0.08	0.16	0	0.82	4805
A	5	7	4	0.67	0.94	0.98	1.92	0.98	0.99	1.05	0.98	0	0.82	216
C	19	22	7	0.34	0.57	0.76	1.33	0.76	0.9	0.44	0.47	0.01	0.9	166
E	7	7	3	0.43	0.53	0.93	1.46	0.11	0.14	1.38	1.3	0	0.97	1020
M	1	2	1	0.67	0	0	0	0.01	0.01	-0.09	-0.09	0	0	832
Helix 8	Base Pair (156:165)		BPC: cWW	AI: --	Strong
Frequency
Aln	GC	CG	UA	AU	GU	UG	AA	AC	AG	CA	CC	CU	GA	GG	UC	UU	gap	Seq
T	6.2*	27.0*	27.1*	11.2*	2	13.3	0.1	--	0.1	0.2	--	0.1	--	0.1	0.1	0.1	12.2	7030
3	7.3*	29.9*	30.8*	12.8*	2.3	15.3	0.1	--	0.1	0.2	--	0.1	--	0.1	0.1	0.1	0.7	6040
B	8.8*	31.8*	20.4*	15.8*	2.9	18.6	0.1	--	0.1	0.1	--	0.1	0.1	0.1	0.1	0.1	0.9	4805
A	--	92.1	--	--	--	7.9	--	--	--	--	--	--	--	--	--	--	--	216
C	--	57.5*	24.6*	6.0*	1.2	5.4	--	--	1.2	1.2	--	0.6	--	0.6	--	1.2	0.6	167
E	1.6*	7.8*	86.8*	1.7*	0.2	1.3	--	--	0.1	0.5	--	0.1	--	--	--	--	0.1	1019
M	--	--	0.4*	0.7*	--	0.1	0.1	--	--	--	--	--	--	--	--	--	98.6	832
Collective Score
Aln	Xch	Ych	PE	PES	Cov1	Cov3	C1+C3	WC	WCGU	XCons	YCons	DfDel	PNuc	Seq
T	253	221	129	0.54	0.73	0.82	1.55	0.82	0.99	-0.31	-0.29	0	0.72	7030
3	233	201	117	0.54	0.73	0.81	1.54	0.81	0.99	0.19	0.23	0	0.83	6040
B	220	191	109	0.53	0.67	0.78	1.44	0.78	0.99	0.08	0.22	0	0.81	4805
A	3	0	0	0	0	0	0	0.92	1	1.6	2	0	0.82	216
C	19	18	11	0.59	0.73	0.89	1.61	0.89	0.95	0.59	0.72	0	0.91	167
E	10	10	8	0.8	0.84	0.98	1.81	0.98	0.99	1.33	1.3	0	0.97	1019
M	1	2	1	0.67	0	0	0	0.01	0.01	-0.1	-0.11	0	0	832
Helix 8	Base Pair (157:164)		BPC: cWW	AI: --	Strong
Frequency
Aln	GC	CG	UA	AU	GU	UG	AA	AC	AG	CA	CC	CU	GA	GG	UC	UU	gap	Seq
T	9.5	7.1	7.9	8.8	32.6*	21.8*	0.1	0.1*	--	0.1*	--	--	--	0.2	--	0.1	11.8	7078
3	11	8.2	8.9	10.1	37.8*	23.2*	--	0.1*	--	0.1*	--	--	--	0.2	--	0.1	0.3	6087
B	13.2	10.3	11.2	2.4	33.1*	29.0*	--	0.1*	--	0.1*	--	--	--	0.2	--	0.1	0.3	4852
A	--	--	--	--	99.5	--	--	--	--	--	--	--	--	--	--	--	0.5	216
C	4.8	3	6.5	0.6	6.0*	78.0*	0.6*	--	--	--	--	--	--	--	--	--	0.6	168
E	2.7*	--	--	48.8*	47.2	0.4*	0.1	--	--	--	--	0.1	--	--	--	0.3	0.4	1019
M	--	--	0.6*	1.1*	--	--	0.2	--	--	--	--	--	--	0.1*	--	--	97.9	832
Collective Score
Aln	Xch	Ych	PE	PES	Cov1	Cov3	C1+C3	WC	WCGU	XCons	YCons	DfDel	PNuc	Seq
T	193	199	91	0.46	0.39	0.62	1.01	0.38	0.99	-0.22	-0.26	0	0.73	7078
3	181	184	83	0.46	0.38	0.61	0.99	0.38	0.99	0.31	0.27	0	0.84	6087
B	171	180	80	0.46	0.44	0.62	1.06	0.37	0.99	0.46	0.17	0	0.82	4852
A	0	0	0	0	0	0	0	0	1	1.95	2	0	0.81	216
C	9	12	5	0.48	0.31	0.85	1.16	0.15	0.99	1.17	0.96	0	0.92	168
E	10	4	3	0.43	0.06	0	0.06	0.52	0.99	0.93	1.74	0	0.96	1019
M	3	3	3	1	0.01	0	0.01	0.02	0.02	-0.14	-0.14	0	0	832
Helix 8	Base Pair (158:163)		BPC: cWW	AI: --	Strong
Frequency
Aln	GC	CG	UA	AU	GU	UG	AA	AC	AG	CA	CC	CU	GA	GG	UC	UU	gap	Seq
T	66.1*	12.7*	0.6*	7.3*	0.2	0.8	--	--	--	--	0.1	0.3	--	--	--	0.1	11.4	7078
3	74.3*	14.8*	0.6*	8.4*	0.2	0.9	--	--	--	--	0.2	0.1	--	--	--	0.1	0.3	6087
B	70.0*	17.3*	0.5*	10.5*	0.2	0.8	--	--	--	--	0.2	0.1	--	0.1	--	--	0.2	4850
A	99.5*	0.5*	--	--	--	--	--	--	--	--	--	--	--	--	--	--	--	216
C	89.9*	1.2*	3.0*	2.4*	1.2	--	0.6	0.6	--	--	--	--	--	--	0.6	--	0.6	168
E	89.3*	5.8*	1.1*	0.4*	0.3	1.9	--	0.2	--	--	0.2	--	0.2	--	0.1	0.4	0.2	1021
M	0.6*	0.2	0.5*	0.4	0.2	--	--	--	--	--	--	2.3*	--	--	--	0.2	95.5	832
Collective Score
Aln	Xch	Ych	PE	PES	Cov1	Cov3	C1+C3	WC	WCGU	XCons	YCons	DfDel	PNuc	Seq
T	123	125	96	0.77	0.92	0.98	1.9	0.98	0.99	0.27	0.29	0	0.74	7078
3	110	111	88	0.8	0.93	0.98	1.92	0.98	0.99	0.85	0.88	0	0.84	6087
B	102	101	85	0.84	0.95	0.99	1.94	0.99	0.99	0.75	0.78	0	0.82	4850
A	1	1	1	1	1	1	2	1	1	1.96	1.96	0	0.82	216
C	8	9	6	0.71	0.69	0.97	1.66	0.97	0.98	1.4	1.38	0	0.92	168
E	7	9	2	0.25	0.69	0.97	1.66	0.97	0.99	1.41	1.41	0	0.97	1021
M	5	5	2	0.4	0.01	0	0.01	0.02	0.02	-0.25	-0.25	0	0	832
Helix 9	Base Pair (184:193)		BPC: cWW	AI: --	Strong
Frequency
Aln	GC	CG	UA	AU	GU	UG	AA	AC	AG	CA	CC	CU	GA	GG	UC	UU	gap	Seq
T	11.6*	19.9*	9.3*	19.8*	6.2	2	0.2	0.3	1.4	0.2	0.3	0.3	0.1	0.2	0.5	1.4	26.4	7034
3	11.8*	23.1*	10.7*	22.6*	5.8	2.3	0.1	0.3	1.6	0.2	0.3	0.3	0.1	0.2	0.5	1.6	18.4	6041
B	14.6*	29.0*	13.3*	28.1*	6	2.7	0.2	0.4	1.9	0.2	0.1	0.4	0.1	0.3	0.1	0.9	1.8	4800
A	3.7	1.4	4.2	6.5	29.4*	4.7	--	0.5	3.3*	--	5.6	0.5	--	--	14.0*	25.7	0.5	214
C	33.7	1.2*	3.6*	7.1	52.7*	--	--	--	--	--	--	0.6	--	--	--	--	1.2	169
E	--	--	--	--	--	--	--	--	--	--	--	--	--	--	--	--	100	1028
M	5.5*	0.1	0.2	2.2*	0.1	0.2*	0.8	0.1	0.2	--	--	--	0.1	--	--	--	90.2	832
Collective Score
Aln	Xch	Ych	PE	PES	Cov1	Cov3	C1+C3	WC	WCGU	XCons	YCons	DfDel	PNuc	Seq
T	303	291	144	0.48	0.76	0.82	1.58	0.82	0.94	-0.81	-0.73	0	0.61	7034
3	292	277	142	0.5	0.77	0.84	1.61	0.84	0.94	-0.66	-0.56	0	0.69	6041
B	271	262	137	0.51	0.81	0.87	1.68	0.87	0.95	-0.07	0.05	0	0.81	4800
A	21	15	5	0.28	0.25	0.47	0.72	0.16	0.5	0.36	0.5	0	0.81	214
C	6	5	0	0	0.1	0	0.1	0.46	0.99	1.17	0.69	0	0.92	169
E	0	0	0	0	0	0	0	0	0	0	0	0	0	1028
M	5	9	2	0.29	0.03	0	0.03	0.08	0.08	-0.45	-0.43	0	0	832
Helix 9	Base Pair (185:192)		BPC: cWW	AI: --	Strong
Frequency
Aln	GC	CG	UA	AU	GU	UG	AA	AC	AG	CA	CC	CU	GA	GG	UC	UU	gap	Seq
T	4.1*	32.9*	20.0*	8.6*	1.1	4.9	0.2	--	0.1	0.4	0.1	0.1	0.1	0.1	--	1.2	25.8	7065
3	4.3*	35.5*	23.1*	9.6*	1.3	5.6	0.1	--	0.1	0.5	0.1	0.1	0.1	0.2	--	1.3	17.8	6072
B	4.3*	42.7*	28.5*	11.4*	1.7	7.1	0.1	--	0.1	0.6	0.1	0.2	0.1	0.2	--	1.7	1.3	4829
A	25.5*	42.6*	12.5*	14.4*	--	0.9	1.9	--	--	0.9	--	--	1.4	--	--	--	--	216
C	--	89.9*	4.1*	3.6*	--	0.6	--	--	--	0.6	--	--	--	--	--	--	1.2	169
E	--	--	--	--	--	--	--	--	--	--	--	--	--	--	--	--	100	1028
M	3.2*	2.4*	0.5*	2.4*	--	0.4	0.6	--	0.1	--	--	--	0.1	--	--	0.1	90	832
Collective Score
Aln	Xch	Ych	PE	PES	Cov1	Cov3	C1+C3	WC	WCGU	XCons	YCons	DfDel	PNuc	Seq
T	273	259	150	0.56	0.8	0.89	1.68	0.89	0.97	-0.6	-0.55	0.01	0.61	7065
3	260	244	139	0.55	0.79	0.88	1.68	0.88	0.97	-0.42	-0.37	0.01	0.69	6072
B	246	231	126	0.53	0.79	0.88	1.67	0.88	0.97	0.23	0.33	0.01	0.81	4829
A	14	13	13	0.96	0.91	0.95	1.86	0.95	0.96	0.15	0.13	0	0.82	216
C	6	6	6	1	0.87	0.99	1.85	0.99	0.99	1.39	1.39	0	0.92	169
E	0	0	0	0	0	0	0	0	0	0	0	0	0	1028
M	7	9	5	0.62	0.06	0	0.06	0.09	0.09	-0.45	-0.48	0	0	832
Helix 9	Base Pair (186:191)		BPC: cWW	AI: --	Strong
Frequency
Aln	GC	CG	UA	AU	GU	UG	AA	AC	AG	CA	CC	CU	GA	GG	UC	UU	gap	Seq
T	7.5*	53.7*	3.7*	2.0*	0.2	5.2	0.1	--	0.1	--	0.1	0.1	0.1	0.2	--	0.4	26.2	7040
3	8.7*	62.1*	1.8*	1.7*	0.3	5.9	--	--	0.1	--	0.1	0.1	--	0.2	--	0.4	18.2	6048
B	10.9*	73.9*	2.0*	2.1*	0.3	7.4	0.1	--	0.2	--	0.2	0.1	0.1	0.3	0.1	0.6	1.6	4806
A	--	94.4*	3.7*	--	--	0.5	--	--	--	0.5	--	0.9	--	--	--	--	--	215
C	--	14.9*	76.2*	1.8*	0.6	4.8	--	--	--	0.6	--	--	--	--	--	--	1.2	168
E	--	--	--	--	--	--	--	--	--	--	--	--	--	--	--	--	100	1028
M	0.4*	0.5*	2.9*	4.7*	--	0.2	0.6	--	0.1	--	--	--	0.2	0.1	--	--	90.2	832
Collective Score
Aln	Xch	Ych	PE	PES	Cov1	Cov3	C1+C3	WC	WCGU	XCons	YCons	DfDel	PNuc	Seq
T	177	136	82	0.52	0.66	0.91	1.57	0.91	0.98	-0.25	-0.06	0	0.61	7040
3	159	118	70	0.51	0.62	0.91	1.53	0.91	0.98	0.04	0.3	0.01	0.69	6048
B	157	114	70	0.52	0.62	0.91	1.52	0.91	0.98	0.73	1.09	0.01	0.81	4806
A	2	4	0	0	0.67	0.98	1.65	0.98	0.99	1.75	1.67	0	0.81	215
C	9	9	7	0.78	0.74	0.94	1.68	0.94	0.99	1.09	0.99	0	0.91	168
E	0	0	0	0	0	0	0	0	0	0	0	0	0	1028
M	9	9	5	0.56	0.04	0	0.04	0.08	0.09	-0.44	-0.46	0	0	832
Helix 10	Base Pair (198:219)		BPC: cWW	AI: --	Strong
Frequency
Aln	GC	CG	UA	AU	GU	UG	AA	AC	AG	CA	CC	CU	GA	GG	UC	UU	gap	Seq
T	59.8*	0.5*	0.5*	3.7*	8.5	0.1	--	0.1	0.1	--	0.1	--	0.1	0.2	0.1	0.1	26	7137
3	67.7*	0.5*	0.5*	3.7*	9.7	0.1	--	0.1	--	--	0.1	--	0.1	0.3	0.1	--	17.1	6144
B	81.3*	0.6*	0.6*	4.3*	11.8	0.1	--	0.1	--	--	0.1	--	0.1	0.3	0.1	--	0.5	4898
A	82.2*	--	0.9*	7.3*	7.3	--	--	--	0.5	--	--	--	--	1.4	--	--	0.5	219
C	61.5*	4.1*	0.6*	18.3*	5.9	--	0.6	0.6	0.6	--	--	--	1.2	0.6	0.6	1.8	3.6	169
E	--	--	--	--	--	--	--	--	--	--	--	--	--	--	--	--	100	1028
M	0.2*	--	0.1	1.3*	0.2	--	--	--	--	0.1*	--	--	--	--	--	0.4	97.4	832
Collective Score
Aln	Xch	Ych	PE	PES	Cov1	Cov3	C1+C3	WC	WCGU	XCons	YCons	DfDel	PNuc	Seq
T	76	145	38	0.34	0.34	0.87	1.21	0.87	0.99	0.33	0.06	0	0.62	7137
3	57	126	30	0.33	0.31	0.87	1.19	0.87	0.99	0.67	0.36	0	0.71	6144
B	53	120	27	0.31	0.3	0.87	1.18	0.87	0.99	1.57	1.18	0	0.83	4898
A	4	6	3	0.6	0.47	0.91	1.38	0.91	0.98	1.48	1.15	0	0.83	219
C	17	19	8	0.44	0.66	0.88	1.54	0.88	0.94	0.64	0.48	0.01	0.9	169
E	0	0	0	0	0	0	0	0	0	0	-0.01	0	0	1028
M	2	0	0	0	0	0	0	0.02	0.02	-0.19	-0.15	0	0	832
Helix 10	Base Pair (199:218)		BPC: cWW	AI: --	Strong
Frequency
Aln	GC	CG	UA	AU	GU	UG	AA	AC	AG	CA	CC	CU	GA	GG	UC	UU	gap	Seq
T	11.8*	17.9*	4.2*	26.0*	5.4	1.2	0.2	0.1	--	--	0.1	0.2	0.9	0.1	--	0.1	31.7	7117
3	12.0*	20.8*	4.8*	29.5*	6.2	1.4	--	0.1	--	--	0.1	0.2	1	0.1	--	0.1	23.6	6124
B	13.6*	24.3*	6.0*	36.6*	7.7	1.2	--	0.2	--	--	0.1	0.2	1.2	0.1	--	0.2	8.3	4880
A	30.9*	38.7*	2.8*	10.1*	1.8	10.6	--	--	--	--	0.5	0.5	0.9	--	--	--	3.3	217
C	64.5*	1.2*	0.6*	23.7*	4.1	--	--	0.6	--	--	0.6	0.6	--	0.6	--	--	3.6	169
E	--	--	--	--	--	--	--	--	--	--	--	--	--	--	--	--	100	1028
M	--	--	0.1	0.5	0.1*	--	1.2*	0.1	--	--	0.2*	--	--	--	--	--	97.7	832
Collective Score
Aln	Xch	Ych	PE	PES	Cov1	Cov3	C1+C3	WC	WCGU	XCons	YCons	DfDel	PNuc	Seq
T	226	191	118	0.57	0.8	0.88	1.68	0.88	0.97	-0.79	-0.73	0	0.57	7117
3	215	179	112	0.57	0.8	0.88	1.68	0.88	0.98	-0.66	-0.58	0	0.65	6124
B	191	162	101	0.57	0.8	0.88	1.68	0.88	0.98	-0.25	-0.16	0	0.76	4880
A	24	17	11	0.54	0.75	0.85	1.61	0.85	0.98	0.03	0.22	0	0.8	217
C	10	11	5	0.48	0.8	0.93	1.73	0.93	0.97	0.75	0.7	0.01	0.9	169
E	0	0	0	0	0	0	0	0	0	0	0	0	0	1028
M	1	1	1	1	0	0	0	0.01	0.01	-0.17	-0.17	0	0	832
Helix 10	Base Pair (200:217)		BPC: cWW	AI: --	Strong
Frequency
Aln	GC	CG	UA	AU	GU	UG	AA	AC	AG	CA	CC	CU	GA	GG	UC	UU	gap	Seq
T	10.8*	5.2*	6.2*	12.5*	0.9	1.4	--	0.1	0.1	0.1	--	0.1	0.5	0.2	--	0.2	61.7	7093
3	12.5*	5.9*	6.8*	12.9*	1	1.5	--	0.1	0.1	0.1	--	0.1	0.5	0.2	--	0.2	58	6101
B	15.5*	6.6*	8.3*	15.7*	1.1	1.8	--	--	0.1	0.1	--	0.1	0.7	0.2	--	0.2	49.5	4854
A	6.8*	19.6*	5.5*	9.1*	3.2	0.5	--	2.3	0.5	--	--	--	--	0.5	--	--	52.1	219
C	1.2*	0.6*	15.4*	60.4*	0.6	0.6	0.6	--	--	--	0.6	1.2	0.6	1.2	--	0.6	16.6	169
E	--	--	--	--	--	--	--	--	--	--	--	--	--	--	--	--	100	1028
M	--	0.2	0.5	0.4	0.4*	1.2*	--	--	--	--	--	--	--	--	--	--	97.3	832
Collective Score
Aln	Xch	Ych	PE	PES	Cov1	Cov3	C1+C3	WC	WCGU	XCons	YCons	DfDel	PNuc	Seq
T	135	138	95	0.7	0.86	0.91	1.77	0.91	0.97	-0.94	-0.94	0	0.32	7093
3	121	126	86	0.7	0.87	0.91	1.78	0.91	0.97	-0.96	-0.96	0	0.36	6101
B	114	119	80	0.69	0.87	0.91	1.79	0.91	0.97	-0.96	-0.96	0	0.42	4854
A	7	7	6	0.86	0.76	0.86	1.61	0.86	0.93	-0.94	-0.92	0	0.4	219
C	12	10	7	0.64	0.74	0.93	1.67	0.93	0.94	0.07	0.17	0.02	0.78	169
E	0	0	0	0	0	0	0	0	0	0	0	0	0	1028
M	2	2	2	1	0	0	0	0.01	0.03	-0.19	-0.17	0	0	832
Helix 10	Base Pair (201:216)		BPC: cWW	AI: --	Strong
Frequency
Aln	GC	CG	UA	AU	GU	UG	AA	AC	AG	CA	CC	CU	GA	GG	UC	UU	gap	Seq
T	3.9	2.9*	1.8*	0.8	21.0*	0.5	0.1	0.1*	0.1	0.1	--	0.1	0.1	0.2	--	0.3	67.8	7143
3	4.5	3.3*	2.0*	0.7	24.4*	0.5	--	0.1*	--	0.1	--	0.1	0.1	0.2	--	0.3	63.5	6151
B	5.5	3.4*	2.2*	0.9	30.6*	0.5	0.1	0.1*	--	--	0.1	0.1	0.1	0.2	--	0.4	55.9	4903
A	3.2*	16.4*	7.3*	0.5*	0.5	3.2	--	--	--	0.9	--	0.5	--	1.8	--	--	66	220
C	3.6*	0.6*	4.1*	5.3*	0.6	1.8	0.6	0.6	--	--	--	--	--	--	--	0.6	82.3	169
E	--	--	--	--	--	--	--	--	--	--	--	--	--	--	--	--	100	1028
M	--	--	0.2*	0.1	0.1*	--	--	0.4	1.1*	0.2	--	--	--	0.1	--	0.2	97.4	832
Collective Score
Aln	Xch	Ych	PE	PES	Cov1	Cov3	C1+C3	WC	WCGU	XCons	YCons	DfDel	PNuc	Seq
T	48	46	20	0.43	0.44	0.81	1.25	0.29	0.96	-0.6	-0.7	0	0.27	7143
3	42	42	18	0.43	0.45	0.82	1.27	0.29	0.97	-0.58	-0.7	0	0.31	6151
B	38	38	17	0.45	0.42	0.82	1.25	0.27	0.97	-0.51	-0.66	0	0.37	4903
A	4	4	1	0.25	0.61	0.8	1.42	0.8	0.91	-0.77	-0.73	0.01	0.28	220
C	3	2	0	0	0.67	0.77	1.43	0.77	0.9	-0.62	-0.68	0.01	0.17	169
E	0	0	0	0	0	0	0	0	0	0	0	0	0	1028
M	3	2	2	0.8	0.01	0	0.01	0	0.01	-0.18	-0.17	0	0	832
Helix 10	Base Pair (202:215)		BPC: cWW	AI: --	Strong
Frequency
Aln	GC	CG	UA	AU	GU	UG	AA	AC	AG	CA	CC	CU	GA	GG	UC	UU	gap	Seq
T	22.8*	5.6*	0.4*	0.7*	0.2	0.1	--	--	--	--	--	--	--	0.1	--	--	69.8	7151
3	26.5*	6.5*	0.3*	0.8*	0.3	0.1	--	--	--	--	--	--	--	0.1	--	--	65.4	6159
B	33.1*	7.6*	0.3*	0.6*	0.3	0.1	--	0.1	--	--	0.1	--	--	0.2	--	--	57.6	4910
A	2.3*	13.6*	1.4*	8.6*	--	--	--	--	--	0.9	--	--	--	--	--	--	73.3	221
C	--	--	7.7*	0.6*	--	0.6	--	--	--	--	--	--	--	--	0.6	--	90.6	169
E	--	--	--	--	--	--	--	--	--	--	--	--	--	--	--	--	100	1028
M	--	--	0.2*	0.4*	--	--	0.2	--	--	--	--	--	0.1	0.1*	--	--	98.8	832
Collective Score
Aln	Xch	Ych	PE	PES	Cov1	Cov3	C1+C3	WC	WCGU	XCons	YCons	DfDel	PNuc	Seq
T	29	26	18	0.66	0.91	0.98	1.89	0.98	0.99	-0.59	-0.6	0	0.25	7151
3	27	23	17	0.68	0.92	0.98	1.9	0.98	0.99	-0.57	-0.59	0	0.3	6159
B	22	19	14	0.68	0.92	0.98	1.9	0.98	0.99	-0.5	-0.54	0	0.35	4910
A	5	4	3	0.67	0.93	0.97	1.9	0.97	0.97	-0.71	-0.77	0.01	0.22	221
C	1	3	1	0.5	0.01	0	0.01	0.08	0.09	-0.33	-0.41	0	0	169
E	0	0	0	0	0	0	0	0	0	0	0	0	0	1028
M	1	0	0	0	0	0	0	0.01	0.01	-0.15	-0.1	0	0	832
Helix 10	Base Pair (203:214)		BPC: cWW	AI: --	Strong
Frequency
Aln	GC	CG	UA	AU	GU	UG	AA	AC	AG	CA	CC	CU	GA	GG	UC	UU	gap	Seq
T	15.2*	5.7*	1.0*	0.8*	0.1	2.4	0.1	--	--	--	0.1	--	--	0.1	--	--	74.2	7167
3	17.6*	6.6*	1.2*	0.8*	0.1	2.8	--	--	--	--	0.2	--	--	0.1	--	--	70.3	6175
B	21.7*	8.2*	1.1*	1.0*	0.1	3.3	--	--	--	--	0.2	--	0.1	0.2	--	--	63.9	4926
A	6.8*	2.7*	9.5*	0.5*	0.9	3.2	--	0.5	--	--	--	--	--	--	--	--	76.1	221
C	1.2*	0.6*	1.2*	1.8*	1.2	--	0.6	--	--	--	--	--	--	0.6	--	--	92.9	169
E	--	--	--	--	--	--	--	--	--	--	--	--	--	--	--	--	100	1028
M	--	--	--	0.2	0.1*	--	0.5*	0.1	--	0.1	--	--	--	--	--	--	98.8	832
Collective Score
Aln	Xch	Ych	PE	PES	Cov1	Cov3	C1+C3	WC	WCGU	XCons	YCons	DfDel	PNuc	Seq
T	50	33	17	0.41	0.71	0.88	1.59	0.88	0.98	-0.7	-0.66	0	0.22	7167
3	47	30	17	0.44	0.72	0.89	1.6	0.89	0.98	-0.72	-0.68	0	0.25	6175
B	44	26	16	0.46	0.72	0.89	1.61	0.89	0.98	-0.75	-0.68	0	0.3	4926
A	3	4	1	0.29	0.69	0.81	1.5	0.81	0.98	-0.74	-0.77	0	0.2	221
C	2	1	0	0	0.03	0	0.03	0.05	0.06	-0.37	-0.36	0	0	169
E	0	0	0	0	0	0	0	0	0	0	0	0	0	1028
M	1	2	0	0	0	0	0	0	0	-0.14	-0.1	0	0	832
Helix 10	Base Pair (206:213)		BPC: cWW	AI: --	Strong
Frequency
Aln	GC	CG	UA	AU	GU	UG	AA	AC	AG	CA	CC	CU	GA	GG	UC	UU	gap	Seq
T	0.5*	10.2*	6.9*	0.5*	0.1	0.2	--	--	--	0.1	0.1	0.1	--	--	--	--	81.2	7176
3	0.6*	11.8*	8.0*	0.5*	0.1	0.3	--	--	--	0.1	0.1	0.1	--	--	--	--	78.5	6184
B	0.3*	14.3*	10.0*	0.5*	0.1	0.3	--	--	0.1	0.1	0.1	0.1	--	--	--	--	74.1	4935
A	10.0*	10.0*	0.5*	4.1*	--	0.5	0.5	--	--	0.5	--	--	--	--	--	--	74.2	221
C	--	0.6*	--	2.4*	--	--	--	--	--	--	--	--	--	--	--	--	97.1	169
E	--	--	--	--	--	--	--	--	--	--	--	--	--	--	--	--	100	1028
M	0.1	--	0.2*	0.2*	0.1	--	0.2	--	--	0.2	--	--	0.1	0.2*	--	0.2	98.2	832
Collective Score
Aln	Xch	Ych	PE	PES	Cov1	Cov3	C1+C3	WC	WCGU	XCons	YCons	DfDel	PNuc	Seq
T	46	42	36	0.82	0.92	0.96	1.88	0.96	0.98	-0.58	-0.58	0	0.16	7176
3	42	40	34	0.83	0.93	0.97	1.9	0.97	0.99	-0.6	-0.61	0	0.19	6184
B	37	38	32	0.85	0.94	0.97	1.91	0.97	0.99	-0.62	-0.63	0	0.22	4935
A	5	2	2	0.57	0.91	0.95	1.86	0.95	0.96	-0.74	-0.75	0	0.22	221
C	0	0	0	0	0.01	0	0.01	0.03	0.03	-0.17	-0.29	0	0	169
E	0	0	0	0	0	0	0	0	0	0	0	0	0	1028
M	4	2	2	0.67	0.01	0	0.01	0.01	0.01	-0.14	-0.12	0	0	832
Helix 10	Base Pair (207:212)		BPC: cWW	AI: --	Strong
Frequency
Aln	GC	CG	UA	AU	GU	UG	AA	AC	AG	CA	CC	CU	GA	GG	UC	UU	gap	Seq
T	1.2*	14.2*	1.2*	0.9*	0.5	0.8	--	--	--	--	--	--	--	--	--	--	81	7178
3	1.4*	16.5*	1.2*	1.0*	0.6	0.9	--	--	--	--	--	--	--	--	--	--	78.4	6186
B	1.1*	20.6*	1.5*	1.2*	0.3	1.1	--	--	--	--	--	--	--	--	--	--	74	4937
A	13.6*	1.8*	--	0.5*	8.6	0.5	--	--	--	--	--	--	--	0.5	--	--	74.7	221
C	--	--	1.8*	1.2*	--	--	0.6	--	--	--	--	--	--	--	--	--	96.5	169
E	--	--	--	--	--	--	--	--	--	--	--	--	--	--	--	--	100	1028
M	0.1*	--	0.5*	0.6*	--	0.2	--	--	0.1	--	--	0.1	--	--	0.1	0.1	98	832
Collective Score
Aln	Xch	Ych	PE	PES	Cov1	Cov3	C1+C3	WC	WCGU	XCons	YCons	DfDel	PNuc	Seq
T	41	36	23	0.6	0.7	0.92	1.62	0.92	0.99	-0.55	-0.53	0	0.16	7178
3	37	31	20	0.59	0.7	0.93	1.62	0.93	1	-0.57	-0.55	0	0.19	6186
B	36	30	20	0.61	0.72	0.94	1.66	0.94	1	-0.58	-0.55	0	0.22	4937
A	1	1	0	0	0.19	0	0.19	0.62	0.98	-0.47	-0.66	0	0.21	221
C	1	1	1	1	0.01	0	0.01	0.03	0.03	-0.19	-0.25	0	0	169
E	0	0	0	0	0	0	0	0	0	0	0	0	0	1028
M	3	4	2	0.57	0.01	0	0.01	0.01	0.01	-0.13	-0.14	0	0	832
Helix 11	Base Pair (240:286)		BPC: cWW	AI: --	Strong
Frequency
Aln	GC	CG	UA	AU	GU	UG	AA	AC	AG	CA	CC	CU	GA	GG	UC	UU	gap	Seq
T	16.0*	67.3*	10.5*	4.7*	0.1	0.5	0.1	--	--	0.1	0.1	--	--	0.1	--	--	0.6	7196
3	8.1*	74.9*	11.9*	4.0*	--	0.6	0.1	--	--	0.1	--	--	--	0.1	--	--	0.1	6203
B	10.0*	69.7*	14.3*	4.9*	--	0.4	0.1	--	--	0.1	0.1	0.1	--	0.1	--	--	0.1	4956
A	0.5*	86.9*	6.3*	--	--	6.3	--	--	--	--	--	--	--	--	--	--	--	221
C	--	97.6*	1.2*	--	--	--	--	--	--	0.6	--	--	--	--	--	--	0.6	169
E	0.6*	97.3*	1.3*	0.5*	--	0.2	--	--	--	0.1	--	--	--	--	--	--	0.1	1026
M	77.5*	4.3*	1.8*	10.8*	0.7	--	--	--	0.1	--	0.1	--	--	--	--	--	4.5	832
Collective Score
Aln	Xch	Ych	PE	PES	Cov1	Cov3	C1+C3	WC	WCGU	XCons	YCons	DfDel	PNuc	Seq
T	125	130	111	0.87	0.97	0.99	1.96	0.99	1	0.58	0.59	0	0.84	7196
3	106	111	96	0.89	0.96	0.99	1.95	0.99	1	0.81	0.82	0	0.86	6203
B	93	99	87	0.91	0.97	0.99	1.96	0.99	0.99	0.66	0.66	0	0.84	4956
A	8	7	5	0.67	0.52	0.94	1.45	0.94	1	1.41	1.62	0	0.84	221
C	2	3	2	0.8	0.67	0.99	1.66	0.99	0.99	1.84	1.81	0.01	0.92	169
E	5	5	4	0.8	0.89	1	1.89	1	1	1.79	1.79	0	0.97	1026
M	17	16	13	0.79	0.95	0.99	1.94	0.99	1	0.78	0.76	0	0.68	832
Helix 11	Base Pair (241:285)		BPC: cWW	AI: --	Strong
Frequency
Aln	GC	CG	UA	AU	GU	UG	AA	AC	AG	CA	CC	CU	GA	GG	UC	UU	gap	Seq
T	32.6*	40.6*	12.6*	9.0*	2.2	2.1	--	0.1	--	--	0.1	--	--	0.2	--	--	0.5	7233
3	26.5*	47.0*	11.8*	9.5*	2.2	2.4	--	--	--	--	0.1	--	--	0.2	--	--	--	6240
B	32.7*	36.8*	14.7*	11.8*	2.8	0.5	--	0.1	--	--	0.1	--	--	0.2	--	--	--	4993
A	5.4*	91.0*	0.5*	2.3*	--	0.5	--	--	--	--	--	--	--	--	--	--	0.5	221
C	--	1.2*	97.6*	--	--	--	--	--	--	--	--	--	0.6	--	--	--	0.6	169
E	0.8*	87.0*	0.1*	--	--	12	--	--	--	0.1	--	--	--	--	--	--	--	1026
M	84.7*	--	0.6*	7.0*	2.5	0.2	--	0.1	--	--	0.1	--	--	--	--	0.1	4.5	832
Collective Score
Aln	Xch	Ych	PE	PES	Cov1	Cov3	C1+C3	WC	WCGU	XCons	YCons	DfDel	PNuc	Seq
T	174	165	145	0.85	0.92	0.95	1.87	0.95	1	0.17	0.17	0	0.84	7233
3	144	130	121	0.88	0.9	0.95	1.85	0.95	1	0.23	0.25	0	0.87	6240
B	128	117	111	0.91	0.94	0.96	1.9	0.96	0.99	0.15	0.12	0	0.85	4993
A	8	8	8	1	0.95	0.99	1.94	0.99	1	1.42	1.5	0	0.83	221
C	3	2	2	0.8	0.67	0.99	1.66	0.99	0.99	1.79	1.87	0.01	0.92	169
E	8	5	2	0.31	0.07	0	0.07	0.88	1	1.4	1.91	0	0.97	1026
M	27	33	22	0.73	0.71	0.97	1.68	0.97	1	1.19	1.11	0	0.68	832
Helix 11	Base Pair (242:284)		BPC: cWW	AI: --	Strong
Frequency
Aln	GC	CG	UA	AU	GU	UG	AA	AC	AG	CA	CC	CU	GA	GG	UC	UU	gap	Seq
T	38.1*	18.2	10.1	0.2*	0.1	32.3*	--	--	0.1	0.1*	0.2	--	--	0.1	0.1	--	0.4	7218
3	40.6*	17.8	5.7	0.1*	--	35.2*	--	--	0.1	--	0.2	--	--	--	0.1	--	--	6225
B	48.4*	20.6	6.8	0.1*	--	23.5*	--	--	--	--	0.3	--	--	--	0.1	--	--	4979
A	54.5*	21.4*	4.5*	--	--	19.1	--	--	--	--	0.5	--	--	--	--	--	--	220
C	97.0*	--	--	1.8*	--	--	--	--	--	--	--	--	0.6	--	--	--	0.6	169
E	--	3.4	0.3	--	--	95.8	--	--	0.4	--	--	--	--	--	0.1	--	--	1026
M	7.0*	24.4*	45.6*	0.6*	0.5	16.3	0.1	--	--	0.5	--	0.1	0.1	0.2	--	--	4.5	832
Collective Score
Aln	Xch	Ych	PE	PES	Cov1	Cov3	C1+C3	WC	WCGU	XCons	YCons	DfDel	PNuc	Seq
T	149	129	82	0.59	0.53	0.71	1.24	0.67	0.99	0.42	0.56	0	0.84	7218
3	83	62	48	0.66	0.6	0.76	1.36	0.64	0.99	0.47	0.73	0	0.87	6225
B	72	53	44	0.7	0.46	0.72	1.18	0.76	0.99	0.47	0.68	0	0.85	4979
A	4	4	2	0.5	0.57	0.81	1.38	0.81	0.99	0.51	0.8	0	0.83	220
C	2	2	2	1	0.75	0.99	1.74	0.99	0.99	1.81	1.82	0.01	0.92	169
E	7	5	2	0.33	0	0	0	0.04	0.99	1.75	1.96	0	0.97	1026
M	64	65	32	0.5	0.64	0.81	1.45	0.81	0.99	0.44	0.33	0	0.68	832
Helix 11	Base Pair (245:283)		BPC: cWW	AI: B	Strong
Frequency
Aln	GC	CG	UA	AU	GU	UG	AA	AC	AG	CA	CC	CU	GA	GG	UC	UU	gap	Seq
T	--	--	0.1	0.1	0.2	--	--	0.1	--	--	42.1*	0.1	--	--	0.2	56.3*	0.5	7222
3	--	--	--	--	--	--	--	--	--	--	38.0*	0.1	--	--	0.1	61.5*	--	6230
B	--	--	--	--	--	--	--	--	--	--	25.2*	0.1	--	--	0.1	74.3*	--	4985
A	--	--	--	--	--	--	--	--	--	--	44.3*	--	--	--	0.5	55.2*	--	221
C	--	--	--	--	--	0.6	--	--	--	--	--	0.6	--	--	--	98.8	--	170
E	--	--	--	--	--	--	--	0.1	--	0.1	99.2*	--	--	--	--	0.6*	--	1024
M	0.1	--	0.4	0.2	2	0.1	0.1*	1	--	--	81.2*	--	--	--	1.3	8.1*	5.4	830
Collective Score
Aln	Xch	Ych	PE	PES	Cov1	Cov3	C1+C3	WC	WCGU	XCons	YCons	DfDel	PNuc	Seq
T	46	39	29	0.68	0.98	0.99	1.97	0	0	0.93	0.94	0	0.84	7222
3	29	31	26	0.87	0.99	1	1.99	0	0	1.03	1.02	0	0.87	6230
B	24	24	21	0.88	0.98	1	1.98	0	0	1.17	1.16	0	0.85	4985
A	2	3	2	0.8	0.99	0.99	1.99	0	0	1.01	1.01	0	0.84	221
C	1	0	0	0	0	0	0	0	0.01	1.95	1.95	0	0.93	170
E	3	4	3	0.86	0.75	1	1.75	0	0	1.94	1.94	0	0.97	1024
M	16	8	3	0.25	0.61	0.94	1.56	0.01	0.03	0.91	1.06	0	0.68	830
Helix 11	Base Pair (247:277)		BPC: cWW	AI: --	Strong
Frequency
Aln	GC	CG	UA	AU	GU	UG	AA	AC	AG	CA	CC	CU	GA	GG	UC	UU	gap	Seq
T	84.4*	0.1*	0.1*	14.3*	0.4	--	--	--	--	--	0.1	--	--	--	--	--	0.4	7251
3	87.3*	0.1*	0.1*	11.9*	0.3	--	--	--	--	--	0.1	--	--	--	--	--	--	6257
B	99.2*	--	--	0.1*	0.4	--	--	--	--	--	0.1	--	--	0.1	--	--	--	5011
A	100	--	--	--	--	--	--	--	--	--	--	--	--	--	--	--	--	221
C	97.1*	--	--	0.6*	2.4	--	--	--	--	--	--	--	--	--	--	--	--	170
E	26.7*	0.7*	0.5*	72.0*	--	--	--	--	--	--	--	--	--	--	0.1	--	--	1025
M	59.0*	0.1*	0.4*	34.7*	0.2	--	0.2	--	--	--	0.2	0.2	--	--	--	--	4.8	832
Collective Score
Aln	Xch	Ych	PE	PES	Cov1	Cov3	C1+C3	WC	WCGU	XCons	YCons	DfDel	PNuc	Seq
T	22	26	17	0.71	0.96	0.99	1.96	0.99	1	1.32	1.32	0	0.85	7251
3	11	14	10	0.8	0.96	0.99	1.96	0.99	1	1.44	1.43	0	0.87	6257
B	5	8	4	0.61	0.24	0.99	1.23	0.99	1	1.96	1.93	0	0.85	5011
A	0	0	0	0	0	0	0	1	1	2	2	0	0.84	221
C	1	2	0	0	0.2	0	0.2	0.98	1	1.95	1.81	0	0.93	170
E	6	6	6	1	1	1	2	1	1	1.06	1.06	0	0.97	1025
M	10	10	7	0.7	0.97	0.99	1.96	0.99	0.99	0.64	0.66	0	0.68	832
Helix 11	Base Pair (248:276)		BPC: cWW	AI: --	Strong
Frequency
Aln	GC	CG	UA	AU	GU	UG	AA	AC	AG	CA	CC	CU	GA	GG	UC	UU	gap	Seq
T	20.5*	72.6*	3.7*	1.2*	--	0.8	--	--	--	0.1	0.4	--	--	0.1	--	--	0.4	7247
3	11.3*	81.5*	4.2*	1.2*	--	0.8	--	--	--	0.1	0.4	--	--	0.1	--	--	--	6253
B	9.8*	82.2*	4.7*	1.5*	--	0.7	--	--	--	0.1	0.5	0.1	--	0.1	0.1	--	0.1	5006
A	95.5*	2.7*	1.8*	--	--	--	--	--	--	--	--	--	--	--	--	--	--	223
C	--	95.3*	2.9*	--	--	1.8	--	--	--	--	--	--	--	--	--	--	--	170
E	0.3*	95.0*	2.3*	0.4*	--	1.5	--	--	--	0.1	--	--	--	--	--	0.1	0.3	1024
M	93.4*	0.1*	0.2*	1.0*	0.1	0.1	--	--	--	--	--	--	--	--	--	--	5	832
Collective Score
Aln	Xch	Ych	PE	PES	Cov1	Cov3	C1+C3	WC	WCGU	XCons	YCons	DfDel	PNuc	Seq
T	125	117	94	0.78	0.95	0.99	1.93	0.99	0.99	0.87	0.89	0	0.85	7247
3	111	104	82	0.76	0.91	0.98	1.9	0.98	0.99	1.1	1.12	0	0.87	6253
B	97	93	71	0.75	0.91	0.98	1.89	0.98	0.99	1.12	1.12	0	0.85	5006
A	4	4	4	1	1	1	2	1	1	1.69	1.69	0	0.84	223
C	5	3	3	0.75	0.62	0.98	1.61	0.98	1	1.73	1.81	0	0.93	170
E	10	7	7	0.82	0.65	0.98	1.63	0.98	1	1.67	1.74	0	0.97	1024
M	9	10	9	0.95	0.85	1	1.84	1	1	1.48	1.49	0	0.68	832
Helix 11	Base Pair (249:275)		BPC: cWW	AI: --	Strong
Frequency
Aln	GC	CG	UA	AU	GU	UG	AA	AC	AG	CA	CC	CU	GA	GG	UC	UU	gap	Seq
T	--	9.1	0.1	0.1*	--	88.7*	--	--	0.1	1.2*	--	--	--	0.1	--	0.1	0.5	7256
3	--	0.4	0.1	--	--	97.9*	--	--	--	1.2*	--	--	--	--	--	0.1	--	6263
B	--	0.1	0.1	--	--	98.4*	--	--	0.1	1.2*	--	--	--	--	0.1	0.1	--	5017
A	--	--	0.4	--	--	91.5*	--	--	--	8.1*	--	--	--	--	--	--	--	223
C	--	--	--	--	--	97.6*	--	--	--	2.4*	--	--	--	--	--	--	--	170
E	--	1.8	--	0.2*	--	97.0*	--	--	--	--	--	--	0.3*	0.1	--	0.4	0.3	1023
M	0.1*	76.4*	0.1*	0.4*	--	16.2	0.1	--	0.2	0.6	0.1	0.1	--	0.2	--	--	5.3	831
Collective Score
Aln	Xch	Ych	PE	PES	Cov1	Cov3	C1+C3	WC	WCGU	XCons	YCons	DfDel	PNuc	Seq
T	47	29	16	0.42	0.12	0	0.12	0.09	0.98	1.44	1.81	0	0.85	7256
3	18	16	11	0.65	0.63	0.99	1.62	0.01	0.98	1.86	1.86	0	0.87	6263
B	11	12	8	0.7	0.75	1	1.74	0	0.99	1.89	1.88	0	0.86	5017
A	2	2	2	1	0.95	1	1.94	0	0.92	1.6	1.58	0	0.84	223
C	1	1	1	1	1	1	2	0	0.98	1.84	1.84	0	0.93	170
E	5	2	1	0.29	0.18	0	0.18	0.02	0.99	1.8	1.9	0	0.97	1023
M	28	12	4	0.2	0.03	0	0.03	0.81	0.98	0.88	1.48	0	0.68	831
Helix 11	Base Pair (252:274)		BPC: cWW	AI: --	Strong
Frequency
Aln	GC	CG	UA	AU	GU	UG	AA	AC	AG	CA	CC	CU	GA	GG	UC	UU	gap	Seq
T	2.0*	0.2*	74.9*	20.7*	0.1	0.1	0.4	0.3	0.2	--	--	--	--	--	0.1	0.4	0.6	7244
3	--	0.2*	82.6*	16.4*	--	--	0.3	--	0.2	--	--	--	--	--	--	0.1	--	6251
B	--	0.2*	98.2*	1.4*	--	--	--	--	--	--	--	--	--	--	0.1	--	--	5006
A	--	0.5*	80.6*	18.9*	--	--	--	--	--	--	--	--	--	--	--	--	--	222
C	--	--	97.6*	2.4*	--	--	--	--	--	--	--	--	--	--	--	--	--	170
E	--	0.1*	6.9*	89.3*	0.2	--	1.7	0.1	1.2	--	--	--	--	--	--	0.5	--	1023
M	17.8*	--	11.0*	56.6*	0.6	0.6	1	2.3	0.1	0.1	0.2	0.1	--	--	0.6	2.4	6.5	831
Collective Score
Aln	Xch	Ych	PE	PES	Cov1	Cov3	C1+C3	WC	WCGU	XCons	YCons	DfDel	PNuc	Seq
T	74	79	54	0.71	0.94	0.98	1.92	0.98	0.99	1.02	1	0	0.84	7244
3	32	34	30	0.91	0.96	0.99	1.95	0.99	0.99	1.32	1.31	0	0.87	6251
B	25	25	24	0.96	0.9	1	1.9	1	1	1.86	1.85	0	0.85	5006
A	2	2	2	1	1	1	2	1	1	1.26	1.26	0	0.84	222
C	1	1	1	1	1	1	2	1	1	1.84	1.84	0	0.93	170
E	5	7	4	0.67	0.66	0.96	1.62	0.96	0.97	1.59	1.47	0	0.97	1023
M	41	44	23	0.54	0.78	0.91	1.7	0.91	0.93	0.3	0.3	0	0.67	831
Helix 11	Base Pair (253:273)		BPC: cWW	AI: --	Strong
Frequency
Aln	GC	CG	UA	AU	GU	UG	AA	AC	AG	CA	CC	CU	GA	GG	UC	UU	gap	Seq
T	0.2*	8.5*	83.6*	4.6*	--	--	--	--	0.1	0.1	--	--	--	--	0.1	0.2	2.4	7209
3	--	2.7*	92.9*	3.9*	--	--	--	--	--	0.1	--	--	--	--	0.1	0.2	--	6207
B	--	0.4*	95.5*	3.7*	--	--	--	--	--	--	--	--	--	--	--	0.2	--	4958
A	--	17.5*	66.4*	15.7*	--	--	--	--	--	0.4	--	--	--	--	--	--	--	223
C	--	--	99.4	--	--	0.6	--	--	--	--	--	--	--	--	--	--	--	170
E	0.2*	10.1*	85.9*	2.3*	--	--	0.1	--	0.2	0.5	--	--	--	--	0.3	0.4	--	1026
M	1.3*	53.5*	11.0*	10.8*	0.1	--	0.2	--	0.2	0.1	0.4	--	0.1	0.2	0.1	--	21.9	840
Collective Score
Aln	Xch	Ych	PE	PES	Cov1	Cov3	C1+C3	WC	WCGU	XCons	YCons	DfDel	PNuc	Seq
T	68	73	58	0.82	0.95	0.99	1.95	0.99	0.99	1.08	1.06	0	0.83	7209
3	50	56	46	0.87	0.93	0.99	1.92	0.99	0.99	1.57	1.56	0	0.86	6207
B	32	37	30	0.87	0.93	1	1.92	1	1	1.72	1.71	0	0.85	4958
A	6	5	5	0.91	0.99	1	1.98	1	1	0.75	0.75	0	0.84	223
C	1	2	1	0.67	0	0	0	0.99	1	2	1.95	0	0.93	170
E	12	14	11	0.85	0.9	0.98	1.88	0.98	0.98	1.32	1.3	0	0.97	1026
M	17	15	11	0.69	0.94	0.98	1.92	0.98	0.98	-0.21	-0.21	0.01	0.57	840
Helix 11	Base Pair (254:272)		BPC: cWW	AI: --	Strong
Frequency
Aln	GC	CG	UA	AU	GU	UG	AA	AC	AG	CA	CC	CU	GA	GG	UC	UU	gap	Seq
T	88.3*	0.3*	2.1*	0.9*	0.5	--	--	0.1	--	0.1	0.1	--	0.1	0.1	0.1	0.1	7.2	7105
3	98.9*	--	0.1*	0.1*	0.6	--	--	--	--	--	--	--	0.1	0.1	--	--	--	6090
B	99.2	--	--	--	0.5	--	--	0.1	--	--	--	--	0.1	0.1	--	--	--	4855
A	100	--	--	--	--	--	--	--	--	--	--	--	--	--	--	--	--	212
C	98.8*	--	--	1.2*	--	--	--	--	--	--	--	--	--	--	--	--	--	170
E	97.0*	0.1*	0.9*	0.4*	1.4	--	--	--	--	--	--	--	--	0.1	0.1	--	0.1	1023
M	10.2*	2.6*	16.4*	7.0*	0.4	--	0.1	0.4	--	0.5	0.5	0.1	0.1	0.1	0.1	0.5	61.1	853
Collective Score
Aln	Xch	Ych	PE	PES	Cov1	Cov3	C1+C3	WC	WCGU	XCons	YCons	DfDel	PNuc	Seq
T	33	44	22	0.57	0.76	0.99	1.75	0.99	0.99	1.22	1.08	0.02	0.77	7105
3	4	15	3	0.32	0.22	0.99	1.22	0.99	1	1.96	1.91	0	0.85	6090
B	1	8	0	0	0.03	0	0.03	0.99	1	1.98	1.94	0	0.83	4855
A	0	0	0	0	0	0	0	1	1	2	2	0	0.8	212
C	2	2	2	1	1	1	2	1	1	1.91	1.91	0	0.93	170
E	3	7	3	0.6	0.47	0.98	1.45	0.98	1	1.87	1.77	0	0.97	1023
M	27	27	17	0.63	0.88	0.93	1.81	0.93	0.94	-0.9	-0.84	0.14	0.29	853
Helix 11	Base Pair (255:271)		BPC: cWW	AI: --	Strong
Frequency
Aln	GC	CG	UA	AU	GU	UG	AA	AC	AG	CA	CC	CU	GA	GG	UC	UU	gap	Seq
T	87.2*	0.2*	1.8*	0.2*	0.4	--	--	--	--	--	0.1	--	0.1	--	--	--	9.7	7290
3	97.9*	0.1*	1.6*	--	0.1	--	--	--	--	--	0.1	--	0.1	--	--	--	--	6269
B	99.7	--	--	--	--	--	--	--	--	--	0.1	--	0.1	--	--	--	--	5019
A	80.4*	--	17.0*	--	1.8	--	--	--	--	0.4	--	--	--	--	0.4	--	--	224
C	97.6*	--	--	1.2*	--	--	--	--	--	--	--	--	0.6	--	--	--	0.6	170
E	92.7*	0.4*	6.2*	0.1*	0.3	0.1	--	--	--	--	0.1	--	0.1	--	--	--	--	1026
M	6.3*	1.3*	3.7*	1.3*	2.9	0.2	0.1	0.1	--	--	--	--	0.1	0.1	--	--	83.7	859
Collective Score
Aln	Xch	Ych	PE	PES	Cov1	Cov3	C1+C3	WC	WCGU	XCons	YCons	DfDel	PNuc	Seq
T	24	31	18	0.66	0.75	0.99	1.74	0.99	1	1.16	1.04	0.02	0.77	7290
3	11	15	10	0.77	0.82	1	1.82	1	1	1.85	1.85	0	0.87	6269
B	1	2	0	0	0	0	0	1	1	1.98	1.99	0	0.86	5019
A	2	4	2	0.67	0.86	0.97	1.84	0.97	0.99	1.29	1.21	0	0.85	224
C	2	3	2	0.8	0.67	0.99	1.66	0.99	0.99	1.91	1.79	0.01	0.93	170
E	8	9	8	0.94	0.92	0.99	1.91	0.99	1	1.6	1.58	0	0.97	1026
M	11	13	6	0.5	0.64	0.78	1.41	0.78	0.97	-0.57	-0.57	0.13	0.12	859
Helix 11	Base Pair (256:270)		BPC: cWW	AI: --	Strong
Frequency
Aln	GC	CG	UA	AU	GU	UG	AA	AC	AG	CA	CC	CU	GA	GG	UC	UU	gap	Seq
T	0.4*	1.0*	81.8*	0.5*	0.4	0.1	0.6	0.4	--	4.2	--	--	0.2	--	0.2	0.1	10.1	7283
3	0.4*	1.1*	91.6*	0.1*	0.4	0.1	0.7	0.4	--	4.8	--	--	0.1	--	0.1	0.1	--	6262
B	0.1	0.1*	92.1*	--	--	0.2	0.8	0.5*	--	5.8	--	--	0.1	--	0.1	--	--	5014
A	7.2	14.3*	62.8*	--	12.6*	--	--	--	--	3.1	--	--	--	--	--	--	--	223
C	0.6*	--	89.4*	0.6*	--	--	1.2	0.6	--	1.8	--	--	2.4	--	3.5	--	--	170
E	0.3*	3.3*	95.2*	0.3*	--	--	0.1	0.1	--	0.1	--	--	--	--	0.3	0.3	--	1025
M	0.5*	0.2*	7.8*	3.7*	--	--	0.2	0.2	--	0.2	--	--	--	--	--	--	87.1	859
Collective Score
Aln	Xch	Ych	PE	PES	Cov1	Cov3	C1+C3	WC	WCGU	XCons	YCons	DfDel	PNuc	Seq
T	107	38	24	0.33	0.24	0.93	1.17	0.93	0.94	0.85	0.99	0.02	0.77	7283
3	91	30	20	0.33	0.24	0.94	1.17	0.93	0.94	1.51	1.77	0	0.87	6262
B	72	12	6	0.14	0.07	0	0.07	0.92	0.93	1.54	1.9	0	0.85	5014
A	12	12	8	0.67	0.72	0.9	1.62	0.84	0.97	0.68	0.55	0	0.84	223
C	8	3	2	0.36	0.06	0	0.06	0.91	0.91	1.52	1.68	0	0.93	170
E	7	6	6	0.92	0.82	0.99	1.81	0.99	0.99	1.71	1.68	0	0.97	1025
M	8	5	2	0.31	0.05	0	0.05	0.12	0.12	-0.47	-0.42	0	0	859
Helix 11	Base Pair (257:269)		BPC: cWW	AI: --	Strong
Frequency
Aln	GC	CG	UA	AU	GU	UG	AA	AC	AG	CA	CC	CU	GA	GG	UC	UU	gap	Seq
T	34.6*	0.3*	0.5*	25.8*	27.2	0.4	0.1	0.1	--	--	--	0.2	0.1	--	--	0.1	10.4	7236
3	39.9*	0.1*	0.4*	28.4*	30.1	0.4	0.1	0.1	--	--	--	0.3	--	--	--	0.1	--	6215
[truncated: 7,082 more rows]

## Sheet: 23S
Helix 1	Base Pair (1:2902)		BPC: cWW	AI: --	Strong
Frequency
Aln	GC	CG	UA	AU	GU	UG	AA	AC	AG	CA	CC	CU	GA	GG	UC	UU	gap	Seq
T	40.7*	0.9*	4.9*	10.4*	4.3	0.6	1.8	0.3	--	0.6	--	0.6	--	--	0.3	0.6	33.9	327
3	50.8*	1.2*	2.4*	7.7*	3.7	--	1.6	--	--	0.8	--	0.8	--	--	--	0.4	30.4	246
B	69.9*	1.2*	3.5*	10.4*	4	--	2.3	--	--	--	--	0.6	--	--	--	0.6	7.5	173
A	12.1*	3	--	3.0*	6.1	--	--	--	--	6.1*	--	3	--	--	--	--	66.7	33
C	12.8*	--	2.1*	12.8*	6.4	--	2.1	--	--	--	--	--	--	--	--	--	63.8	47
E	--	--	--	--	--	--	--	--	--	--	--	--	--	--	--	--	100	40
M	5.9*	--	26.5*	26.5*	5.9	5.9	2.9	2.9	--	--	--	--	--	--	2.9	2.9	17.6	34
Collective Score
Aln	Xch	Ych	PE	PES	Cov1	Cov3	C1+C3	WC	WCGU	XCons	YCons	DfDel	PNuc	Seq
T	22	22	9	0.41	0.64	0.86	1.5	0.86	0.94	-0.54	-0.28	0.11	0.21	327
3	14	10	3	0.25	0.61	0.9	1.5	0.9	0.95	-0.19	-0.23	0.04	0.27	246
B	11	10	3	0.29	0.67	0.92	1.58	0.92	0.96	0.63	0.73	0.05	0.49	173
A	3	0	0	0	0.43	0.64	1.06	0.55	0.73	-0.71	-0.97	0.05	0.27	33
C	2	3	1	0.4	0.64	0.77	1.4	0.77	0.94	-0.53	0.68	0.78	0.17	47
E	0	0	0	0	0	0	0	0	0	-0.35	-0.29	0.05	0	40
M	6	9	5	0.67	0.58	0.71	1.29	0.71	0.86	-0.64	-0.71	0.02	0.09	34
Helix 1	Base Pair (2:2901)		BPC: cWW	AI: --	Strong
Frequency
Aln	GC	CG	UA	AU	GU	UG	AA	AC	AG	CA	CC	CU	GA	GG	UC	UU	gap	Seq
T	36.5*	2.8*	7.7*	17.2*	2.5	--	0.6	0.3	0.3	0.3	0.3	0.6	0.9	--	1.2	1.5	27.2	326
3	45.9*	3.3*	3.7*	16.3*	2	--	0.8	0.4	--	0.4	--	0.8	--	--	0.8	0.4	25.1	246
B	63.6*	0.6*	5.2*	23.1*	2.9	--	1.2	0.6	--	--	--	0.6	--	--	1.2	--	1.2	173
A	9.1*	21.2*	--	--	--	--	--	--	--	3	--	3	--	--	--	3.0*	60.6	33
C	2.2*	--	21.7*	17.4*	2.2	--	--	--	--	--	--	--	2.2	--	4.3	4.3	45.7	46
E	--	--	--	--	--	--	--	--	--	--	--	--	--	--	--	--	100	40
M	14.7*	2.9*	17.6*	23.5*	5.9	--	--	--	2.9	--	2.9	--	5.9	--	--	5.9	17.6	34
Collective Score
Aln	Xch	Ych	PE	PES	Cov1	Cov3	C1+C3	WC	WCGU	XCons	YCons	DfDel	PNuc	Seq
T	25	23	8	0.33	0.76	0.88	1.65	0.88	0.92	-0.7	-0.5	0.08	0.23	326
3	13	13	4	0.31	0.8	0.92	1.73	0.92	0.95	-0.43	-0.33	0.03	0.29	246
B	10	11	4	0.38	0.82	0.94	1.75	0.94	0.96	0.52	0.8	0.01	0.53	173
A	2	2	0	0	0.67	0.85	1.51	0.77	0.77	-0.42	-0.8	0	0.32	33
C	3	3	0	0	0.6	0.76	1.36	0.76	0.8	-0.68	0.51	0.61	0.24	46
E	1	0	0	0	0	0	0	0	0	-0.39	-0.29	0.04	0	40
M	9	7	4	0.5	0.6	0.71	1.31	0.71	0.79	-0.88	-0.77	0.02	0.09	34
Helix 1	Base Pair (3:2900)		BPC: cWW	AI: --	Strong
Frequency
Aln	GC	CG	UA	AU	GU	UG	AA	AC	AG	CA	CC	CU	GA	GG	UC	UU	gap	Seq
T	4.0*	5.8*	45.2*	8.0*	0.6	7.1	--	0.3	--	0.9	--	3.1	--	--	0.6	3.1	21.1	325
3	5.3*	7.3*	49.0*	2.8*	0.8	1.2	--	--	--	1.2	--	3.6	--	--	0.4	3.6	24.6	247
B	6.9*	4.6	69.9*	4	1.2	1.7	--	--	--	1.7	--	5.2*	--	--	--	2.9	1.8	173
A	3.0*	30.3*	--	--	--	--	--	--	--	--	--	--	--	--	3	12.1*	51.5	33
C	--	--	40.9	6.8*	--	45.5*	--	--	--	--	--	--	--	--	--	2.3	4.5	44
E	--	--	--	--	--	--	--	--	--	--	--	--	--	--	--	--	100	41
M	--	2.9*	23.5*	47.1*	--	--	--	2.9	--	--	--	2.9	--	--	2.9	--	17.6	34
Collective Score
Aln	Xch	Ych	PE	PES	Cov1	Cov3	C1+C3	WC	WCGU	XCons	YCons	DfDel	PNuc	Seq
T	16	20	13	0.72	0.53	0.8	1.33	0.8	0.9	-0.39	-0.44	0.01	0.24	325
3	11	12	6	0.52	0.58	0.85	1.44	0.85	0.88	-0.4	-0.38	0.02	0.29	247
B	7	10	5	0.59	0.43	0.83	1.26	0.87	0.9	0.38	0.63	0.01	0.52	173
A	4	2	1	0.33	0.83	0.94	1.77	0.69	0.69	-0.65	-0.81	0.07	0.39	33
C	1	2	0	0	0.14	0	0.14	0.5	0.98	1.65	0.4	0.02	0.41	44
E	0	0	0	0	0	0	0	0	0	-0.33	-0.29	0.05	0	41
M	4	6	7	1	0.75	0.89	1.64	0.89	0.89	-0.52	-0.49	0.02	0.09	34
Helix 1	Base Pair (4:2899)		BPC: cWW	AI: --	Strong
Frequency
Aln	GC	CG	UA	AU	GU	UG	AA	AC	AG	CA	CC	CU	GA	GG	UC	UU	gap	Seq
T	3.4*	28.6*	31.7*	7.1*	0.6	0.9	1.5	--	0.3	0.3	--	6.2	0.3	--	0.3	0.3	18.4	325
3	3.2*	30.8*	36.4*	4.5*	--	0.8	1.2	--	0.4	0.4	--	--	--	--	0.4	--	21.8	247
B	1.2*	42.8*	49.1*	2.3*	--	1.2	1.2	--	0.6	0.6	--	--	--	--	--	--	1.2	173
A	18.2*	6.1*	15.2*	21.2*	--	--	--	--	--	--	--	--	--	--	3	--	36.4	33
C	--	36.4	6.8*	9.1	2.3	--	--	--	--	--	--	45.5*	--	--	--	--	--	44
E	--	--	--	--	--	--	2.4	--	--	--	--	--	--	--	--	--	97.5	41
M	8.8*	2.9*	29.4*	23.5*	2.9	2.9	5.9	--	--	--	--	--	2.9	--	--	2.9	17.6	34
Collective Score
Aln	Xch	Ych	PE	PES	Cov1	Cov3	C1+C3	WC	WCGU	XCons	YCons	DfDel	PNuc	Seq
T	30	28	18	0.62	0.78	0.87	1.65	0.87	0.89	-0.41	-0.49	0.02	0.25	325
3	18	19	13	0.7	0.92	0.96	1.88	0.96	0.97	-0.36	-0.37	0.02	0.31	247
B	12	15	10	0.74	0.93	0.96	1.9	0.96	0.98	0.61	0.77	0.01	0.53	173
A	6	4	3	0.6	0.93	0.95	1.88	0.95	0.95	-0.51	-0.81	0.15	0.51	33
C	5	4	1	0.22	0.12	0	0.12	0.52	0.55	1.09	0.76	0	0.43	44
E	0	0	0	0	0	0	0	0	0	-0.47	-0.35	0.05	0	41
M	7	5	4	0.67	0.67	0.79	1.45	0.79	0.86	-0.78	-0.68	0.02	0.09	34
Helix 1	Base Pair (5:2898)		BPC: cWW	AI: --	Strong
Frequency
Aln	GC	CG	UA	AU	GU	UG	AA	AC	AG	CA	CC	CU	GA	GG	UC	UU	gap	Seq
T	6.1*	2.5*	2.1*	69.9*	0.6	0.6	0.3	--	--	--	--	0.3	--	--	0.3	0.6	16.5	326
3	6.9*	2.0*	0.8*	70.2*	0.4	--	0.4	--	--	--	--	0.4	--	--	--	--	18.9	248
B	--	0.6*	--	98.9*	--	--	--	--	--	--	--	--	--	--	--	--	0.6	174
A	51.5*	12.1*	6.1*	6.1*	--	--	3	--	--	--	--	3	--	--	--	--	18.2	33
C	--	2.3*	2.3*	95.5*	--	--	--	--	--	--	--	--	--	--	--	--	--	44
E	--	--	--	--	2.4	--	--	--	--	--	--	--	--	--	--	--	97.5	41
M	8.8*	5.9*	11.8*	35.3*	2.9	5.9	--	--	--	--	--	--	--	--	2.9	5.9	20.5	34
Collective Score
Aln	Xch	Ych	PE	PES	Cov1	Cov3	C1+C3	WC	WCGU	XCons	YCons	DfDel	PNuc	Seq
T	20	15	9	0.51	0.8	0.97	1.76	0.97	0.98	0.18	0.27	0.02	0.26	326
3	10	6	3	0.38	0.89	0.98	1.87	0.98	0.99	0.26	0.3	0.03	0.32	248
B	3	1	0	0	1	1	2	1	1	1.66	1.95	0.01	0.53	174
A	5	5	3	0.6	0.8	0.93	1.73	0.93	0.93	-0.12	-0.33	0.02	0.66	33
C	2	2	1	0.5	1	1	2	1	1	1.7	1.72	0	0.43	44
E	2	0	0	0	0	0	0	0	1	-0.48	-0.49	0.06	0	41
M	8	7	5	0.67	0.6	0.78	1.38	0.78	0.89	-0.8	-0.71	0.01	0.09	34
Helix 1	Base Pair (6:2897)		BPC: cWW	AI: --	Strong
Frequency
Aln	GC	CG	UA	AU	GU	UG	AA	AC	AG	CA	CC	CU	GA	GG	UC	UU	gap	Seq
T	7.4*	0.3*	4.6*	68.7*	0.3	--	0.9	--	--	--	--	--	0.6	0.6	--	0.6	15.9	326
3	8.9*	0.4*	1.2*	69.8*	0.4	--	0.4	--	--	--	--	--	--	0.8	--	--	18.1	248
B	0.6*	--	--	98.9*	0.6	--	--	--	--	--	--	--	--	--	--	--	--	174
A	63.6*	3.0*	9.1*	3.0*	--	--	--	--	--	--	--	--	--	6.1	--	--	15.2	33
C	--	--	4.5*	95.5*	--	--	--	--	--	--	--	--	--	--	--	--	--	44
E	--	--	--	--	--	--	2.4	--	--	--	--	--	--	--	--	--	97.4	41
M	5.9*	--	29.4*	26.5*	--	--	5.9	--	--	--	--	--	5.9	--	--	5.9	20.5	34
Collective Score
Aln	Xch	Ych	PE	PES	Cov1	Cov3	C1+C3	WC	WCGU	XCons	YCons	DfDel	PNuc	Seq
T	16	13	11	0.76	0.8	0.96	1.76	0.96	0.97	0.26	0.22	0.02	0.26	326
3	7	6	3	0.46	0.87	0.98	1.85	0.98	0.98	0.36	0.28	0.03	0.32	248
B	2	2	1	0.5	0.5	0.99	1.49	0.99	1	1.85	1.91	0.01	0.53	174
A	3	4	2	0.57	0.71	0.93	1.64	0.93	0.93	0.4	0.15	0	0.68	33
C	1	1	1	1	1	1	2	1	1	1.74	1.76	0	0.43	44
E	2	0	0	0	0	0	0	0	0	-0.55	-0.45	0.05	0	41
M	8	6	7	1	0.65	0.78	1.43	0.78	0.78	-0.64	-0.47	0.01	0.09	34
Helix 1	Base Pair (7:2896)		BPC: cWW	AI: --	Strong
Frequency
Aln	GC	CG	UA	AU	GU	UG	AA	AC	AG	CA	CC	CU	GA	GG	UC	UU	gap	Seq
T	58.1*	4.3*	2.7*	15.2*	1.2	--	0.6	1.5	--	0.3	0.3	--	0.6	--	--	--	15.1	329
3	72.5*	4.8*	0.8*	2.8*	0.8	--	0.4	--	--	0.4	0.4	--	--	--	--	--	17.2	251
B	95.5*	--	0.6*	3.4*	--	--	--	--	--	--	0.6	--	--	--	--	--	--	177
A	39.4*	36.4*	3.0*	3.0*	6.1	--	--	--	--	3	--	--	--	--	--	--	9.1	33
C	15.9*	--	4.5*	68.2*	--	--	--	11.4	--	--	--	--	--	--	--	--	--	44
E	--	--	--	--	--	--	2.4	--	--	--	--	--	--	--	--	--	97.6	41
M	5.9*	5.9*	14.7*	38.2*	5.9	--	2.9	--	--	--	--	--	5.9	--	--	--	20.5	34
Collective Score
Aln	Xch	Ych	PE	PES	Cov1	Cov3	C1+C3	WC	WCGU	XCons	YCons	DfDel	PNuc	Seq
T	20	16	10	0.56	0.83	0.95	1.78	0.95	0.96	-0.02	-0.04	0.01	0.27	329
3	10	7	4	0.47	0.81	0.98	1.78	0.98	0.99	0.33	0.33	0.01	0.33	251
B	5	4	4	0.89	0.88	0.99	1.87	0.99	0.99	1.64	1.66	0.01	0.54	177
A	2	3	0	0	0.82	0.9	1.72	0.9	0.97	0.69	-0.01	0.07	0.73	33
C	2	4	1	0.33	0.64	0.89	1.53	0.89	0.89	1.14	0.82	0	0.43	44
E	3	0	0	0	0	0	0	0	0	-0.66	-0.45	0.03	0	41
M	8	5	5	0.77	0.64	0.81	1.46	0.81	0.89	-0.78	-0.62	0.01	0.09	34
Helix 1	Base Pair (8:2895)		BPC: cWW	AI: --	Weak
Frequency
Aln	GC	CG	UA	AU	GU	UG	AA	AC	AG	CA	CC	CU	GA	GG	UC	UU	gap	Seq
T	4.9*	21.6*	31.6*	3.3*	0.6	15.5	1.8	0.6	--	3	0.3	--	--	0.3	--	0.6	15.7	329
3	5.6*	27.1*	27.5*	1.2*	--	19.9	--	--	--	--	0.4	--	--	0.4	--	--	18	251
B	3.4*	33.3*	33.9*	1.1*	--	27.7	--	--	--	--	--	--	--	0.6	--	--	--	177
A	24.2*	24.2*	27.3*	3.0*	--	3	--	--	--	--	3	--	--	--	--	--	15.1	33
C	2.3*	6.8*	56.8*	2.3*	--	2.3	9.1	--	--	20.5	--	--	--	--	--	--	--	44
E	--	2.4	--	--	--	--	--	--	--	--	--	--	--	--	--	--	97.4	41
M	2.9*	--	29.4*	20.6*	5.9	--	5.9	5.9	--	2.9	--	--	--	--	--	5.9	20.6	34
Collective Score
Aln	Xch	Ych	PE	PES	Cov1	Cov3	C1+C3	WC	WCGU	XCons	YCons	DfDel	PNuc	Seq
T	31	29	7	0.23	0.57	0.73	1.3	0.73	0.92	-0.23	-0.26	0	0.27	329
3	22	21	5	0.23	0.62	0.75	1.37	0.75	0.99	-0.14	-0.16	0.01	0.33	251
B	11	13	3	0.25	0.57	0.72	1.29	0.72	0.99	0.77	0.73	0	0.54	177
A	5	8	2	0.31	0.9	0.93	1.82	0.93	0.96	0.1	-0.3	0.07	0.68	33
C	4	4	1	0.25	0.26	0.68	0.94	0.68	0.7	0.57	1.32	0	0.43	44
E	6	0	0	0	0	0	0	1	1	-0.91	-0.43	0.01	0	41
M	5	4	1	0.22	0.47	0.67	1.14	0.67	0.74	-0.74	-0.53	0.02	0.09	34
Helix 2	Base Pair (15:525)		BPC: cWW	AI: --	Strong
Frequency
Aln	GC	CG	UA	AU	GU	UG	AA	AC	AG	CA	CC	CU	GA	GG	UC	UU	gap	Seq
T	15.9	12.5*	2.4*	12.4	41.9*	2.5	1.5	1.8*	4.8	0.7	--	1	0.3	--	0.3	0.1	1.7	671
3	1.3	20.8*	1.8*	2	63.4*	4	--	0.5*	2	1.3	--	1.8	0.3	--	0.3	0.3	0.6	399
B	1.6	--	0.8*	--	97.6*	--	--	--	--	--	--	--	--	--	--	--	--	247
A	--	--	--	16.7*	5.6	44.4*	--	5.6	11.1	--	--	13.9	--	--	--	2.8	--	36
C	4.3	--	6.5*	4.3	21.7*	--	2.2	19.6	41.3*	--	--	--	--	--	--	--	--	46
E	0.9	71.6*	4.3*	1.7	8.6*	--	--	--	3.4	4.3	--	1.7	0.9	--	0.9	--	1.8	116
M	44.2*	0.4*	2.7*	32.3*	8	0.4	4	0.4	2.2	--	--	--	0.4	--	0.4	--	4.4	226
Collective Score
Aln	Xch	Ych	PE	PES	Cov1	Cov3	C1+C3	WC	WCGU	XCons	YCons	DfDel	PNuc	Seq
T	34	52	18	0.42	0.3	0.6	0.89	0.44	0.89	0.32	0.14	0.02	0.63	671
3	14	19	4	0.24	0.64	0.87	1.51	0.26	0.94	0.63	0.68	0	0.63	399
B	1	4	1	0.4	0.33	0.98	1.32	0.02	1	1.93	1.83	0	0.76	247
A	5	4	1	0.22	0.3	0.61	0.91	0.17	0.67	0.33	0.77	0	0.88	36
C	3	9	0	0	0.48	0.7	1.18	0.15	0.37	0.85	0.43	0	0.45	46
E	8	11	2	0.21	0.48	0.86	1.34	0.8	0.89	0.86	0.91	0	0.43	116
M	17	24	14	0.68	0.69	0.83	1.52	0.83	0.92	0.49	-0.03	0.05	0.69	226
Helix 2	Base Pair (16:524)		BPC: cWW	AI: --	Strong
Frequency
Aln	GC	CG	UA	AU	GU	UG	AA	AC	AG	CA	CC	CU	GA	GG	UC	UU	gap	Seq
T	20.7*	31.4*	17.4*	15.3*	10.1	1.9	0.6	0.1	0.1	0.3	0.3	--	--	--	--	--	1.6	672
3	32.7*	13.1*	24.4*	17.6*	8.5	2.3	--	--	0.3	0.5	0.5	--	--	--	--	--	0.3	398
B	42.3*	14.6*	8.5*	28.0*	6.5	--	--	--	--	--	--	--	--	--	--	--	--	246
A	47.2*	13.9*	2.8*	--	36.1	--	--	--	--	--	--	--	--	--	--	--	--	36
C	2.2	--	--	28.3	67.4*	--	2.2*	--	--	--	--	--	--	--	--	--	--	46
E	7.8*	9.5*	64.7*	0.9*	4.3	7.8	--	--	0.9	1.7	1.7	--	--	--	--	--	0.9	116
M	3.5*	69.7*	8.8*	8.8*	1.3	1.8	1.3	0.4	--	--	--	--	--	--	--	--	4.4	228
Collective Score
Aln	Xch	Ych	PE	PES	Cov1	Cov3	C1+C3	WC	WCGU	XCons	YCons	DfDel	PNuc	Seq
T	33	53	22	0.51	0.8	0.86	1.66	0.86	0.98	-0.06	-0.17	0.01	0.63	672
3	19	36	12	0.44	0.82	0.88	1.7	0.88	0.99	0.1	0.05	0	0.63	398
B	11	16	9	0.67	0.89	0.94	1.82	0.94	1	0.28	0.27	0	0.76	246
A	2	5	1	0.29	0.32	0.64	0.95	0.64	1	1.24	0.43	0	0.88	36
C	2	3	1	0.4	0.07	0	0.07	0.3	0.98	1.11	1.78	0	0.45	46
E	6	15	2	0.19	0.53	0.83	1.36	0.83	0.96	0.71	0.63	0	0.44	116
M	12	14	9	0.69	0.81	0.95	1.76	0.95	0.98	0.46	0.22	0.05	0.7	228
Helix 2	Base Pair (17:523)		BPC: cWW	AI: --	Strong
Frequency
Aln	GC	CG	UA	AU	GU	UG	AA	AC	AG	CA	CC	CU	GA	GG	UC	UU	gap	Seq
T	45.0*	11.5*	9.6*	2.2*	3.1	0.1	--	0.1	--	0.1	0.3	0.6	0.1	--	--	0.1	26.9	676
3	60.7*	19.2*	15.7*	0.5*	2.2	0.2	--	--	--	--	--	1	--	--	--	--	0.4	402
B	96.8	--	--	--	3.2	--	--	--	--	--	--	--	--	--	--	--	--	250
A	5.6*	94.4*	--	--	--	--	--	--	--	--	--	--	--	--	--	--	--	36
C	91.3*	--	--	2.2*	2.2	--	--	--	--	--	4.3	--	--	--	--	--	--	46
E	--	37.1*	54.3*	1.7*	0.9	0.9	--	--	--	--	--	3.4	--	--	--	--	1.8	116
M	7.9*	0.4*	0.9*	5.3*	4.8	--	--	0.4	--	0.4	--	--	0.4	--	--	0.4	79	228
Collective Score
Aln	Xch	Ych	PE	PES	Cov1	Cov3	C1+C3	WC	WCGU	XCons	YCons	DfDel	PNuc	Seq
T	17	27	10	0.46	0.83	0.94	1.77	0.94	0.98	-0.39	0.09	0.15	0.47	676
3	7	12	5	0.53	0.91	0.96	1.88	0.96	0.99	0.62	0.38	0	0.64	402
B	0	4	0	0	0	0	0	0.97	1	2	1.81	0	0.77	250
A	1	1	1	1	1	1	2	1	1	1.69	1.7	0	0.88	36
C	2	2	1	0.5	0.25	0.94	1.19	0.94	0.96	1.59	1.81	0	0.45	46
E	6	7	4	0.61	0.88	0.95	1.83	0.95	0.96	0.72	0.67	0	0.43	116
M	8	13	4	0.38	0.5	0.69	1.19	0.69	0.92	-0.61	0.35	0.49	0.15	228
Helix 2	Base Pair (18:522)		BPC: cWW	AI: --	Strong
Frequency
Aln	GC	CG	UA	AU	GU	UG	AA	AC	AG	CA	CC	CU	GA	GG	UC	UU	gap	Seq
T	2.4*	44.5*	20.0*	1.9*	--	2.2	0.3	--	0.1	--	--	0.1	0.1	0.6	--	0.4	27.3	676
3	2.7*	60.7*	30.1*	0.5*	--	3.7	0.2	--	0.2	--	--	0.2	0.2	0.2	--	0.7	0.2	402
B	--	81.2*	17.2*	--	--	1.2	0.4	--	--	--	--	--	--	--	--	--	--	250
A	--	94.4*	5.6*	--	--	--	--	--	--	--	--	--	--	--	--	--	--	36
C	4.3*	84.8*	4.3*	2.2*	--	--	--	--	--	--	--	--	--	4.3	--	--	--	46
E	9.5*	6.0*	65.5*	1.7*	--	10.3	--	--	0.9	--	--	0.9	0.9	0.9	--	2.6	0.9	116
M	1.3*	7.9*	5.3*	4.4*	--	--	0.4	--	--	--	--	--	--	0.4	--	--	80.2	228
Collective Score
Aln	Xch	Ych	PE	PES	Cov1	Cov3	C1+C3	WC	WCGU	XCons	YCons	DfDel	PNuc	Seq
T	25	45	16	0.46	0.86	0.94	1.8	0.94	0.98	-0.34	0.31	0.15	0.47	676
3	13	19	6	0.38	0.85	0.94	1.8	0.94	0.98	0.77	0.68	0	0.64	402
B	5	4	3	0.67	0.92	0.98	1.9	0.98	1	1.27	1.37	0	0.77	250
A	2	2	2	1	1	1	2	1	1	1.69	1.7	0	0.88	36
C	4	6	2	0.4	0.71	0.96	1.67	0.96	0.96	1.18	1.38	0	0.45	46
E	6	13	1	0.1	0.51	0.83	1.35	0.83	0.94	0.86	0.42	0	0.44	116
M	8	20	8	0.57	0.93	0.96	1.88	0.96	0.96	-0.69	0.21	0.5	0.14	228
Helix 2	Base Pair (19:521)		BPC: cWW	AI: --	Strong
Frequency
Aln	GC	CG	UA	AU	GU	UG	AA	AC	AG	CA	CC	CU	GA	GG	UC	UU	gap	Seq
T	6.2*	10.5*	19.5*	20.8*	12.9	0.1	0.6	--	--	--	0.1	--	--	0.3	--	1.6	27.3	677
3	9.2*	15.6*	23.3*	28.0*	19.6	0.2	1	--	--	--	0.2	--	--	0.5	--	2	0.2	403
B	8.8*	3.2*	22.7*	33.1*	30.3	--	--	--	--	--	--	--	--	--	--	2	--	251
A	38.9*	--	2.8*	47.2*	2.8	--	--	--	--	--	--	--	--	--	--	8.3	--	36
C	8.7	--	63.0*	10.9	15.2*	--	--	--	--	--	--	--	--	--	--	2.2	--	46
E	0.9*	47.4*	31.0*	11.2*	1.7	0.9	3.4	--	--	--	0.9	--	--	1.7	--	--	0.9	116
M	0.4*	3.5*	3.9*	10.1*	0.4	--	--	--	--	--	--	--	--	--	--	0.9	80.7	228
Collective Score
Aln	Xch	Ych	PE	PES	Cov1	Cov3	C1+C3	WC	WCGU	XCons	YCons	DfDel	PNuc	Seq
T	34	55	18	0.4	0.7	0.79	1.48	0.79	0.96	-0.81	-0.02	0.14	0.47	677
3	25	31	12	0.43	0.67	0.76	1.44	0.76	0.96	0.01	0.19	0	0.64	403
B	11	11	3	0.27	0.52	0.68	1.2	0.68	0.98	0.29	0.68	0	0.77	251
A	5	3	2	0.5	0.79	0.89	1.68	0.89	0.92	0.61	0.87	0	0.88	36
C	4	9	0	0	0.41	0.78	1.19	0.83	0.98	0.76	0.62	0	0.45	46
E	9	17	7	0.54	0.83	0.91	1.75	0.91	0.94	0.31	0.47	0	0.44	116
M	5	15	6	0.6	0.86	0.93	1.79	0.93	0.95	-0.64	-0.2	0.48	0.14	228
Helix 2	Base Pair (20:520)		BPC: cWW	AI: --	Strong
Frequency
Aln	GC	CG	UA	AU	GU	UG	AA	AC	AG	CA	CC	CU	GA	GG	UC	UU	gap	Seq
T	4.1*	22.3*	19.8*	21.3*	1	2.2	0.3	0.1	--	0.4	--	--	--	--	0.1	0.6	27.5	677
3	6.9*	36.2*	17.4*	32.8*	1.5	2.5	--	0.2	--	0.7	--	--	--	--	0.2	1	0.4	403
B	2.0*	45.0*	25.9*	22.7*	--	2	--	--	--	1.2	--	--	--	--	--	0.8	0.4	251
A	16.7*	47.2*	5.6*	8.3*	13.9	8.3	--	--	--	--	--	--	--	--	--	--	--	36
C	--	--	84.8	--	--	10.9	4.3	--	--	--	--	--	--	--	--	--	--	46
E	14.7*	13.8*	2.6*	62.1*	0.9	1.7	--	0.9	--	--	--	--	--	--	0.9	1.7	0.9	116
M	--	2.2*	11.0*	5.3*	0.4	--	--	--	--	--	--	--	--	--	--	--	81.1	228
Collective Score
Aln	Xch	Ych	PE	PES	Cov1	Cov3	C1+C3	WC	WCGU	XCons	YCons	DfDel	PNuc	Seq
T	38	48	27	0.63	0.9	0.93	1.83	0.93	0.98	-0.74	-0.66	0.01	0.47	677
3	28	29	17	0.6	0.9	0.94	1.84	0.94	0.98	0.11	0.18	0	0.64	403
B	13	14	9	0.67	0.93	0.96	1.89	0.96	0.98	0.33	0.4	0	0.77	251
A	6	6	4	0.67	0.58	0.78	1.36	0.78	1	0.27	0.41	0	0.88	36
C	1	8	0	0	0	0	0	0.85	0.96	1.74	1.08	0	0.45	46
E	9	9	4	0.44	0.84	0.94	1.78	0.94	0.96	0.42	0.51	0	0.44	116
M	9	11	10	1	0.94	0.98	1.92	0.98	1	-0.6	-0.61	0.05	0.14	228
Helix 2	Base Pair (21:519)		BPC: cWW	AI: --	Strong
Frequency
Aln	GC	CG	UA	AU	GU	UG	AA	AC	AG	CA	CC	CU	GA	GG	UC	UU	gap	Seq
T	8.9*	6.4	5.3	35.9*	5.2	9.0*	--	--	0.4	--	--	0.3	--	--	--	0.9	27.7	677
3	14.6*	9.9	5.7	46.4*	7.9	13.4*	--	--	0.5	--	--	0.5	--	--	--	0.7	0.2	403
B	8.8*	2	6.4	58.6*	1.2	21.5*	--	--	0.8	--	--	--	--	--	--	0.8	--	251
A	--	88.9*	11.1*	--	--	--	--	--	--	--	--	--	--	--	--	--	--	36
C	--	--	--	91.3	6.5	--	--	--	--	--	--	--	--	--	--	2.2	--	46
E	31.9*	2.6*	2.6*	34.5*	25	--	--	--	--	--	--	1.7	--	--	--	0.9	0.9	116
M	0.4*	1.3*	5.7*	6.1*	--	3.1	--	--	0.4	--	--	--	--	--	--	0.9	82.1	228
Collective Score
Aln	Xch	Ych	PE	PES	Cov1	Cov3	C1+C3	WC	WCGU	XCons	YCons	DfDel	PNuc	Seq
T	37	43	25	0.62	0.49	0.74	1.24	0.78	0.98	-0.67	-0.36	0.02	0.47	677
3	26	32	16	0.55	0.53	0.75	1.27	0.77	0.98	0.17	0.46	0	0.64	403
B	13	14	7	0.52	0.73	0.89	1.62	0.76	0.98	0.59	0.53	0	0.77	251
A	2	2	2	1	1	1	2	1	1	1.5	1.51	0	0.88	36
C	2	1	0	0	0	0	0	0.91	0.98	1.5	1.84	0	0.45	46
E	11	16	7	0.52	0.57	0.72	1.29	0.72	0.97	0.53	0.88	0	0.44	116
M	9	10	9	0.95	0.63	0.76	1.39	0.76	0.93	-0.58	-0.67	0.05	0.13	228
Helix 2	Base Pair (22:518)		BPC: cWW	AI: --	Strong
Frequency
Aln	GC	CG	UA	AU	GU	UG	AA	AC	AG	CA	CC	CU	GA	GG	UC	UU	gap	Seq
T	1.6*	40.5*	15.7*	3.7*	--	9.5	0.1	--	--	0.3	0.3	--	0.1	--	--	--	28	676
3	0.5*	59.2*	24.4*	2.5*	--	11.9	--	--	--	0.5	0.5	--	--	--	--	--	0.4	402
B	0.8*	43.6*	32.4*	3.2*	--	18.8	--	--	--	--	0.8	--	--	--	--	--	0.4	250
A	--	52.8*	41.7*	5.6*	--	--	--	--	--	--	--	--	--	--	--	--	--	36
C	4.3*	63.0*	13.0*	10.9*	--	6.5	--	--	--	--	--	--	--	--	--	--	2.2	46
E	--	94.8*	1.7*	--	--	0.9	--	--	--	1.7	--	--	--	--	--	--	0.9	116
M	3.1*	3.1	0.9	4.4*	--	5.7*	0.4	--	--	--	--	--	0.4	--	--	--	81.9	228
Collective Score
Aln	Xch	Ych	PE	PES	Cov1	Cov3	C1+C3	WC	WCGU	XCons	YCons	DfDel	PNuc	Seq
T	28	34	11	0.35	0.67	0.86	1.53	0.86	0.99	-0.39	-0.12	0.01	0.47	676
3	17	20	8	0.43	0.68	0.87	1.55	0.87	0.99	0.81	1	0	0.64	402
B	12	13	4	0.32	0.65	0.8	1.45	0.8	0.99	0.73	0.75	0	0.76	250
A	3	3	3	1	1	1	2	1	1	0.76	0.77	0	0.88	36
C	5	6	0	0	0.81	0.93	1.75	0.93	1	0.52	0.87	0.01	0.44	46
E	2	4	1	0.33	0.4	0.97	1.37	0.97	0.98	1.74	1.72	0	0.44	116
M	6	8	3	0.43	0.61	0.73	1.34	0.63	0.95	-0.67	-0.72	0.05	0.13	228
Helix 2	Base Pair (23:517)		BPC: cWW	AI: --	Strong
Frequency
Aln	GC	CG	UA	AU	GU	UG	AA	AC	AG	CA	CC	CU	GA	GG	UC	UU	gap	Seq
T	55.7*	0.4*	1.5*	12.3*	1.5	--	0.3	--	0.6	--	--	--	--	--	--	--	27.6	677
3	80.1*	--	0.2*	15.6*	2.5	--	0.2	--	1	--	--	--	--	--	--	--	0.2	403
B	99.6*	--	--	0.4*	--	--	--	--	--	--	--	--	--	--	--	--	--	251
A	94.4*	--	--	5.6*	--	--	--	--	--	--	--	--	--	--	--	--	--	36
C	93.5*	--	--	6.5*	--	--	--	--	--	--	--	--	--	--	--	--	--	46
E	33.6*	--	0.9*	51.7*	8.6	--	0.9	--	3.4	--	--	--	--	--	--	--	0.9	116
M	4.8*	1.3*	3.9*	7.5*	--	--	0.4	--	--	--	--	--	--	--	--	--	82	228
Collective Score
Aln	Xch	Ych	PE	PES	Cov1	Cov3	C1+C3	WC	WCGU	XCons	YCons	DfDel	PNuc	Seq
T	17	19	11	0.61	0.86	0.97	1.82	0.97	0.99	-0.03	-0.01	0.02	0.47	677
3	10	11	5	0.48	0.81	0.96	1.77	0.96	0.99	1.29	1.1	0	0.64	403
B	1	1	1	1	1	1	2	1	1	1.96	1.97	0	0.77	251
A	1	1	1	1	1	1	2	1	1	1.69	1.7	0	0.88	36
C	1	1	0	0	1	1	2	1	1	1.65	1.81	0	0.45	46
E	8	9	3	0.35	0.73	0.87	1.6	0.87	0.96	0.87	0.86	0	0.44	116
M	6	7	6	0.92	0.96	0.98	1.93	0.98	0.98	-0.64	-0.68	0.06	0.13	228
Helix 2	Base Pair (24:516)		BPC: cWW	AI: --	Strong
Frequency
Aln	GC	CG	UA	AU	GU	UG	AA	AC	AG	CA	CC	CU	GA	GG	UC	UU	gap	Seq
T	51.3*	0.1*	1.5*	16.7*	1.3	0.4	--	0.1	--	0.4	--	--	--	--	--	--	27.9	676
3	75.1*	--	2.0*	19.2*	2.2	0.2	--	0.2	--	0.7	--	--	--	--	--	--	0.2	402
B	98.4*	--	--	1.6*	--	--	--	--	--	--	--	--	--	--	--	--	--	250
A	75	--	--	--	25	--	--	--	--	--	--	--	--	--	--	--	--	36
C	80.4*	2.2*	4.3*	8.7*	--	4.3	--	--	--	--	--	--	--	--	--	--	--	46
E	25.0*	--	6.9*	62.9*	--	0.9	--	0.9	--	2.6	--	--	--	--	--	--	0.9	116
M	3.5*	--	--	14.0*	--	--	--	--	--	--	--	--	--	--	--	--	82.4	228
Collective Score
Aln	Xch	Ych	PE	PES	Cov1	Cov3	C1+C3	WC	WCGU	XCons	YCons	DfDel	PNuc	Seq
T	15	29	10	0.46	0.89	0.97	1.85	0.97	0.99	-0.14	-0.13	0.02	0.47	676
3	9	16	6	0.48	0.86	0.96	1.82	0.96	0.99	1.06	0.89	0	0.64	402
B	3	5	3	0.75	1	1	2	1	1	1.88	1.87	0	0.77	250
A	0	1	0	0	0	0	0	0.75	1	2	1.2	0	0.88	36
C	3	8	2	0.36	0.78	0.96	1.73	0.96	1	1.01	1.2	0	0.45	46
E	6	10	3	0.38	0.88	0.96	1.84	0.96	0.96	0.57	0.62	0	0.44	116
M	3	5	2	0.5	1	1	2	1	1	-0.45	-0.57	0.06	0.13	228
Helix 2	Base Pair (30:510)		BPC: cWW	AI: B	Strong
Frequency
Aln	GC	CG	UA	AU	GU	UG	AA	AC	AG	CA	CC	CU	GA	GG	UC	UU	gap	Seq
T	49.1*	8.0*	2.2	5	0.6	0.7	5.9*	--	0.4	--	--	--	--	--	--	0.1*	27.8	678
3	76.2*	13.2*	1.7*	5.7*	0.7	1.2	0.7	--	--	--	--	--	--	--	--	--	0.4	403
B	97.6*	--	--	--	1.2	--	1.2*	--	--	--	--	--	--	--	--	--	--	250
A	75.0*	2.8*	13.9*	8.3*	--	--	--	--	--	--	--	--	--	--	--	--	--	36
C	6.5*	--	6.5	--	--	--	80.4*	--	6.5	--	--	--	--	--	--	--	--	46
E	30.8*	44.4*	1.7*	17.1*	--	4.3	--	--	--	--	--	--	--	--	--	--	1.8	117
M	10.0*	0.4*	2.2*	4.8*	0.4	--	--	--	--	--	--	--	--	--	--	0.4	81.6	229
Collective Score
Aln	Xch	Ych	PE	PES	Cov1	Cov3	C1+C3	WC	WCGU	XCons	YCons	DfDel	PNuc	Seq
T	37	23	12	0.4	0.61	0.88	1.48	0.89	0.91	0.21	-0.49	0.19	0.47	678
3	10	13	7	0.61	0.88	0.97	1.86	0.97	0.99	0.88	0.75	0	0.64	403
B	1	3	0	0	0.5	0.99	1.49	0.98	0.99	1.91	1.81	0	0.77	250
A	2	2	2	1	1	1	2	1	1	0.85	0.87	0	0.88	36
C	1	2	0	0	0.33	0.87	1.2	0.13	0.13	1.31	1.56	0	0.45	46
E	7	8	5	0.67	0.92	0.96	1.88	0.96	1	0.15	0.41	0.01	0.44	117
M	26	8	5	0.29	0.9	0.95	1.85	0.95	0.98	0.02	-0.6	0.64	0.14	229
Helix 3	Base Pair (31:474)		BPC: cWW	AI: --	Strong
Frequency
Aln	GC	CG	UA	AU	GU	UG	AA	AC	AG	CA	CC	CU	GA	GG	UC	UU	gap	Seq
T	15.0*	45.6*	17.6*	7.4*	0.1	0.6	0.9	0.4	0.4	5.6	0.3	0.1	2.4	0.1	0.1	0.4	2.7	678
3	9.7*	62.3*	16.7*	8.2*	0.2	0.7	--	--	0.2	--	--	0.2	--	--	--	--	1.4	401
B	--	98.4*	1.2*	--	--	--	--	--	--	--	--	0.4	--	--	--	--	--	249
A	100	--	--	--	--	--	--	--	--	--	--	--	--	--	--	--	--	36
C	6.5*	87.0*	6.5*	--	--	--	--	--	--	--	--	--	--	--	--	--	--	46
E	2.6*	4.3*	55.2*	28.4*	0.9	2.6	--	--	0.9	--	--	--	--	--	--	--	5.2	116
M	26.0*	8.2*	21.2*	7.4*	--	0.4	2.6	1.3	0.9	16.5	0.9	--	6.9	0.4	0.4	1.3	5.6	231
Collective Score
Aln	Xch	Ych	PE	PES	Cov1	Cov3	C1+C3	WC	WCGU	XCons	YCons	DfDel	PNuc	Seq
T	44	33	18	0.47	0.77	0.88	1.65	0.88	0.89	0.16	0	0.02	0.63	678
3	6	9	4	0.53	0.96	0.98	1.94	0.98	0.99	0.46	0.16	0.02	0.63	401
B	2	3	2	0.8	0.75	1	1.75	1	1	1.91	1.88	0	0.76	249
A	0	0	0	0	0	0	0	1	1	2	2	0	0.88	36
C	1	4	0	0	1	1	2	1	1	1.31	1.43	0	0.45	46
E	4	6	2	0.4	0.89	0.95	1.85	0.95	0.99	0.42	0.34	0.06	0.42	116
M	37	20	14	0.49	0.54	0.67	1.2	0.67	0.67	-0.18	-0.1	0.02	0.7	231
Helix 3	Base Pair (32:473)		BPC: cWW	AI: --	Strong
Frequency
Aln	GC	CG	UA	AU	GU	UG	AA	AC	AG	CA	CC	CU	GA	GG	UC	UU	gap	Seq
T	--	90.6*	1.5*	2.3*	0.1	0.7	0.1	--	--	1.5	0.3	0.1	--	0.1	0.1	0.1	2.1	681
3	--	96.0*	0.2*	2.5*	--	0.2	--	--	--	--	0.2	--	--	0.2	--	--	0.4	403
B	--	99.6	--	--	--	--	--	--	--	--	0.4	--	--	--	--	--	--	251
A	--	100	--	--	--	--	--	--	--	--	--	--	--	--	--	--	--	36
C	--	100	--	--	--	--	--	--	--	--	--	--	--	--	--	--	--	46
E	--	87.1*	0.9*	8.6*	--	0.9	--	--	--	--	--	--	--	0.9	--	--	1.8	116
M	--	79.3*	3.9*	2.6*	0.4	1.7	0.4	--	--	4.3	0.4	0.4	--	--	0.4	0.4	5.6	232
Collective Score
Aln	Xch	Ych	PE	PES	Cov1	Cov3	C1+C3	WC	WCGU	XCons	YCons	DfDel	PNuc	Seq
T	16	16	9	0.56	0.53	0.96	1.5	0.96	0.97	1.47	1.29	0.02	0.64	681
3	3	3	2	0.67	0.79	0.99	1.78	0.99	0.99	1.72	1.61	0.02	0.64	403
B	0	1	0	0	0	0	0	1	1	2	1.97	0	0.77	251
A	0	0	0	0	0	0	0	1	1	2	2	0	0.88	36
C	0	0	0	0	0	0	0	1	1	2	2	0	0.45	46
E	3	2	2	0.8	0.85	0.98	1.83	0.98	0.99	1.28	1.25	0.04	0.43	116
M	13	13	7	0.54	0.43	0.91	1.34	0.91	0.93	1.07	0.63	0.02	0.7	232
Helix 4	Base Pair (35:445)		BPC: cWW	AI: --	Strong
Frequency
Aln	GC	CG	UA	AU	GU	UG	AA	AC	AG	CA	CC	CU	GA	GG	UC	UU	gap	Seq
T	94.1*	--	--	1.6*	--	0.3*	0.3	--	--	--	--	--	--	--	--	0.3	3.2	681
3	99.0*	--	--	0.2*	--	--	--	--	--	--	--	--	--	--	--	--	0.7	402
B	100	--	--	--	--	--	--	--	--	--	--	--	--	--	--	--	--	251
A	100	--	--	--	--	--	--	--	--	--	--	--	--	--	--	--	--	36
C	97.8*	--	--	2.2*	--	--	--	--	--	--	--	--	--	--	--	--	--	46
E	96.5*	--	--	0.9*	--	--	--	--	--	--	--	--	--	--	--	--	2.6	115
M	85.0*	--	--	3.9*	--	0.9*	0.9	--	--	--	--	--	--	--	--	0.9	8.5	233
Collective Score
Aln	Xch	Ych	PE	PES	Cov1	Cov3	C1+C3	WC	WCGU	XCons	YCons	DfDel	PNuc	Seq
T	13	12	9	0.72	0.77	0.99	1.76	0.99	0.99	1.58	1.49	0.02	0.63	681
3	1	2	1	0.67	1	1	2	1	1	1.9	1.97	0.01	0.63	402
B	0	0	0	0	0	0	0	1	1	2	2	0	0.77	251
A	0	0	0	0	0	0	0	1	1	2	2	0	0.88	36
C	1	1	1	1	1	1	2	1	1	1.85	1.92	0	0.45	46
E	1	2	1	0.67	1	1	2	1	1	1.71	1.93	0.01	0.43	115
M	11	9	7	0.7	0.73	0.98	1.72	0.97	0.98	1.12	0.68	0.08	0.68	233
Helix 4	Base Pair (36:444)		BPC: cWW	AI: --	Strong
Frequency
Aln	GC	CG	UA	AU	GU	UG	AA	AC	AG	CA	CC	CU	GA	GG	UC	UU	gap	Seq
T	65.8*	25.5*	0.6*	3.2*	0.3	--	0.1	0.4	--	0.1	0.1	--	0.3	--	--	--	3.3	682
3	95.8*	1.0*	--	1.7*	--	--	--	0.7	--	--	0.2	--	--	--	--	--	0.5	403
B	94.8*	1.2*	--	2.4*	--	--	--	1.2	--	--	0.4	--	--	--	--	--	--	251
A	100	--	--	--	--	--	--	--	--	--	--	--	--	--	--	--	--	36
C	97.8*	--	--	2.2*	--	--	--	--	--	--	--	--	--	--	--	--	--	46
E	96.6*	0.9*	--	0.9*	--	--	--	--	--	--	--	--	--	--	--	--	1.7	116
M	7.7*	73.0*	1.7*	6.0*	0.9	--	0.4	--	--	0.4	--	--	0.9	--	--	--	9	233
Collective Score
Aln	Xch	Ych	PE	PES	Cov1	Cov3	C1+C3	WC	WCGU	XCons	YCons	DfDel	PNuc	Seq
T	15	15	9	0.6	0.95	0.98	1.94	0.98	0.99	0.68	0.7	0.02	0.63	682
3	4	4	1	0.25	0.73	0.99	1.72	0.99	0.99	1.68	1.78	0	0.64	403
B	3	2	1	0.4	0.69	0.98	1.68	0.98	0.98	1.66	1.71	0	0.77	251
A	0	0	0	0	0	0	0	1	1	2	2	0	0.88	36
C	1	1	1	1	1	1	2	1	1	1.85	1.92	0	0.45	46
E	1	2	0	0	1	1	2	1	1	1.7	1.85	0.01	0.43	116
M	10	10	7	0.7	0.86	0.97	1.83	0.97	0.98	0.57	0.2	0.08	0.68	233
Helix 4	Base Pair (37:442)		BPC: cWW	AI: --	Strong
Frequency
Aln	GC	CG	UA	AU	GU	UG	AA	AC	AG	CA	CC	CU	GA	GG	UC	UU	gap	Seq
T	1.5*	74.7*	12.2*	2.9*	--	4.3	0.1	--	--	0.4	--	--	--	0.1	--	--	3.6	680
3	1.7*	88.8*	1.7*	2.5*	--	4.7	--	--	--	--	--	--	--	0.2	--	--	0.2	401
B	1.2*	94.8*	0.4*	2.4*	--	0.8	--	--	--	--	--	--	--	0.4	--	--	--	250
A	--	94.4*	2.8*	--	--	2.8	--	--	--	--	--	--	--	--	--	--	--	36
C	--	84.8*	6.5*	--	--	4.3	--	--	--	4.3	--	--	--	--	--	--	--	46
E	3.5*	73.9*	4.3*	3.5*	--	13.9	--	--	--	--	--	--	--	--	--	--	0.9	115
M	1.3*	48.5*	31.3*	4.3*	--	3.4	0.4	--	--	0.4	--	--	--	--	--	--	10.3	233
Collective Score
Aln	Xch	Ych	PE	PES	Cov1	Cov3	C1+C3	WC	WCGU	XCons	YCons	DfDel	PNuc	Seq
T	36	34	20	0.57	0.77	0.95	1.72	0.95	0.99	0.83	0.85	0.03	0.63	680
3	13	12	5	0.4	0.55	0.95	1.5	0.95	1	1.32	1.53	0	0.64	401
B	5	4	3	0.67	0.77	0.99	1.76	0.99	1	1.63	1.73	0	0.77	250
A	1	0	0	0	0.5	0.97	1.47	0.97	1	1.69	1.82	0	0.88	36
C	3	6	1	0.22	0.43	0.91	1.34	0.91	0.96	1.5	1.48	0	0.45	46
E	7	8	2	0.27	0.45	0.86	1.31	0.86	1	0.83	1.29	0	0.43	115
M	20	16	14	0.78	0.9	0.95	1.85	0.95	0.99	0.27	-0.06	0.09	0.67	233
Helix 4	Base Pair (38:441)		BPC: cWW	AI: --	Strong
Frequency
Aln	GC	CG	UA	AU	GU	UG	AA	AC	AG	CA	CC	CU	GA	GG	UC	UU	gap	Seq
T	6.3*	15.0*	31.5*	41.6*	0.4	0.7	0.3	--	--	0.3	--	0.1	--	--	--	--	3.5	680
3	10.2*	0.5*	37.7*	51.4*	--	--	--	--	--	--	--	--	--	--	--	--	0.2	401
B	16.0*	--	4.4*	79.6*	--	--	--	--	--	--	--	--	--	--	--	--	--	250
A	--	--	100	--	--	--	--	--	--	--	--	--	--	--	--	--	--	36
C	2.2*	--	2.2*	95.7*	--	--	--	--	--	--	--	--	--	--	--	--	--	46
E	0.9*	1.7*	90.4*	6.1*	--	--	--	--	--	--	--	--	--	--	--	--	0.9	115
M	0.4*	42.9*	26.6*	14.2*	1.3	2.1	0.9	--	--	0.9	--	0.4	--	--	--	--	10.2	233
Collective Score
Aln	Xch	Ych	PE	PES	Cov1	Cov3	C1+C3	WC	WCGU	XCons	YCons	DfDel	PNuc	Seq
T	34	39	31	0.85	0.96	0.98	1.95	0.98	0.99	0.09	0.07	0.03	0.63	680
3	15	16	14	0.9	1	1	2	1	1	0.55	0.66	0	0.64	401
B	12	13	11	0.88	1	1	2	1	1	1.12	1.13	0	0.77	250
A	0	0	0	0	0	0	0	1	1	2	2	0	0.88	36
C	2	4	2	0.67	1	1	2	1	1	1.7	1.73	0	0.45	46
E	3	3	3	1	1	1	2	1	1	1.31	1.69	0	0.43	115
M	17	19	15	0.83	0.88	0.94	1.82	0.94	0.98	0.03	-0.24	0.09	0.67	233
Helix 4	Base Pair (39:440)		BPC: cWW	AI: --	Strong
Frequency
Aln	GC	CG	UA	AU	GU	UG	AA	AC	AG	CA	CC	CU	GA	GG	UC	UU	gap	Seq
T	7.0*	39.4*	22.1*	14.8*	--	0.6	1.7	2.1	--	0.3	1.1	0.8	0.4	--	--	0.6	9	711
3	10.5*	54.9*	24.2*	9.7*	--	0.2	--	0.2	--	--	--	--	--	--	--	--	0.2	401
B	16.8*	40.8*	28.4*	13.2*	--	0.4	--	0.4	--	--	--	--	--	--	--	--	--	250
A	--	80.6*	19.4*	--	--	--	--	--	--	--	--	--	--	--	--	--	--	36
C	--	74.0*	22.1*	--	--	3.9	--	--	--	--	--	--	--	--	--	--	--	77
E	--	77.4*	16.5*	5.2*	--	--	--	--	--	--	--	--	--	--	--	--	0.9	115
M	3.4*	1.3*	18.5*	28.3*	--	--	5.2	6	--	0.9	3.4	2.6	1.3	--	--	1.7	27.5	233
Collective Score
Aln	Xch	Ych	PE	PES	Cov1	Cov3	C1+C3	WC	WCGU	XCons	YCons	DfDel	PNuc	Seq
T	47	63	37	0.67	0.85	0.92	1.77	0.92	0.92	-0.2	-0.19	0.02	0.62	711
3	19	24	14	0.65	0.99	0.99	1.98	0.99	1	0.34	0.47	0	0.64	401
B	12	13	8	0.64	0.99	0.99	1.98	0.99	1	0.13	0.19	0	0.77	250
A	3	3	3	1	1	1	2	1	1	1.29	1.3	0	0.88	36
C	4	6	3	0.6	0.85	0.96	1.81	0.96	1	1.17	1.26	0	0.75	77
E	4	8	3	0.5	1	1	2	1	1	1	0.96	0	0.43	115
M	24	33	20	0.7	0.49	0.69	1.19	0.71	0.71	-0.48	-0.62	0.08	0.54	233
Helix 4	Base Pair (40:439)		BPC: cWW	AI: --	Strong
Frequency
Aln	GC	CG	UA	AU	GU	UG	AA	AC	AG	CA	CC	CU	GA	GG	UC	UU	gap	Seq
T	9.6*	18.6*	38.1*	6.2*	0.3	0.7	--	--	--	--	--	0.1	--	0.1	--	--	26	709
3	16.3*	23.1*	52.1*	6.5*	0.3	1	--	--	--	--	--	0.3	--	0.3	--	--	0.3	399
B	3.2*	22.2*	70.2*	4.0*	--	--	--	--	--	--	--	--	--	0.4	--	--	--	248
A	91.7*	--	--	8.3*	--	--	--	--	--	--	--	--	--	--	--	--	--	36
C	--	50.6*	48.1*	--	--	1.3	--	--	--	--	--	--	--	--	--	--	--	77
E	20.9*	32.2*	29.6*	11.3*	0.9	3.5	--	--	--	--	--	0.9	--	--	--	--	0.9	115
M	1.3*	0.4*	10.7*	7.7*	0.4	--	--	--	--	--	--	--	--	--	--	--	79.3	233
Collective Score
Aln	Xch	Ych	PE	PES	Cov1	Cov3	C1+C3	WC	WCGU	XCons	YCons	DfDel	PNuc	Seq
T	38	48	32	0.74	0.96	0.98	1.95	0.98	1	-0.59	-0.54	0.01	0.5	709
3	25	33	20	0.69	0.96	0.98	1.95	0.98	0.99	0.3	0.3	0	0.63	399
B	14	15	14	0.97	0.99	1	1.98	1	1	0.81	0.79	0	0.76	248
A	0	0	0	0	1	1	2	1	1	1.59	1.59	0	0.88	36
C	7	8	6	0.8	0.97	0.99	1.96	0.99	1	1	1	0	0.75	77
E	11	18	6	0.41	0.92	0.95	1.87	0.95	0.99	0.02	0.18	0	0.43	115
M	6	7	6	0.92	0.96	0.98	1.94	0.98	1	-0.64	-0.64	0.04	0.15	233
Helix 4	Base Pair (41:438)		BPC: cWW	AI: --	Strong
Frequency
Aln	GC	CG	UA	AU	GU	UG	AA	AC	AG	CA	CC	CU	GA	GG	UC	UU	gap	Seq
T	16.2*	27.8*	9.8*	18.6*	0.1	0.1	--	--	--	--	--	0.1	--	--	--	--	27.1	711
3	27.4*	33.7*	9.7*	28.4*	--	--	--	--	--	--	--	0.2	--	--	--	--	0.4	401
B	30.8*	25.2*	4.4*	39.2*	--	--	--	--	--	--	--	--	--	--	--	--	0.4	250
A	75.0*	--	--	25.0*	--	--	--	--	--	--	--	--	--	--	--	--	--	36
C	--	79.2*	20.8*	--	--	--	--	--	--	--	--	--	--	--	--	--	--	77
E	5.2*	62.6*	24.3*	6.1*	--	--	--	--	--	--	--	0.9	--	--	--	--	0.9	115
M	2.1*	0.9*	6.4*	7.7*	0.4	0.4	--	--	--	--	--	--	--	--	--	--	82	233
Collective Score
Aln	Xch	Ych	PE	PES	Cov1	Cov3	C1+C3	WC	WCGU	XCons	YCons	DfDel	PNuc	Seq
T	42	47	35	0.79	0.99	0.99	1.99	0.99	1	-0.77	-0.69	0.02	0.5	711
3	29	35	23	0.72	1	1	1.99	1	1	0.09	0.09	0	0.63	401
B	17	15	14	0.88	1	1	2	1	1	0.24	0.22	0	0.76	250
A	3	3	3	1	1	1	2	1	1	1.19	1.2	0	0.88	36
C	6	7	7	1	1	1	2	1	1	1.26	1.26	0	0.75	77
E	9	17	6	0.46	0.98	0.99	1.97	0.99	0.99	0.51	0.68	0	0.43	115
M	7	5	5	0.83	0.92	0.95	1.87	0.95	1	-0.66	-0.62	0.07	0.14	233
Helix 4	Base Pair (42:437)		BPC: cWW	AI: --	Strong
Frequency
Aln	GC	CG	UA	AU	GU	UG	AA	AC	AG	CA	CC	CU	GA	GG	UC	UU	gap	Seq
T	27.6*	0.4*	3.5*	40.9*	0.3	--	--	0.1	--	--	--	--	--	--	--	--	27.1	711
3	47.1*	0.2*	4.5*	47.1*	0.5	--	--	0.2	--	--	--	--	--	--	--	--	0.2	401
B	34.0*	--	2.4*	63.2*	0.4	--	--	--	--	--	--	--	--	--	--	--	--	250
A	94.4*	--	--	5.6*	--	--	--	--	--	--	--	--	--	--	--	--	--	36
C	--	--	2.6*	97.4*	--	--	--	--	--	--	--	--	--	--	--	--	--	77
E	60.9*	0.9*	10.4*	25.2*	0.9	--	--	0.9	--	--	--	--	--	--	--	--	0.9	115
M	3.0*	0.9*	2.1*	11.6*	--	--	--	--	--	--	--	--	--	--	--	--	82.5	233
Collective Score
Aln	Xch	Ych	PE	PES	Cov1	Cov3	C1+C3	WC	WCGU	XCons	YCons	DfDel	PNuc	Seq
T	29	36	23	0.71	0.99	0.99	1.98	0.99	1	-0.3	-0.3	0.02	0.5	711
3	22	29	17	0.67	0.99	0.99	1.98	0.99	1	0.73	0.63	0	0.64	401
B	10	11	8	0.76	0.99	1	1.99	1	1	0.92	0.9	0	0.77	250
A	1	1	1	1	1	1	2	1	1	1.69	1.7	0	0.88	36
C	1	2	1	0.67	1	1	2	1	1	1.83	1.78	0	0.75	77
E	11	17	8	0.57	0.95	0.98	1.94	0.98	0.99	0.6	0.48	0	0.43	115
M	6	5	5	0.91	1	1	2	1	1	-0.61	-0.55	0.08	0.13	233
Helix 4	Base Pair (43:436)		BPC: cWW	AI: --	Strong
Frequency
Aln	GC	CG	UA	AU	GU	UG	AA	AC	AG	CA	CC	CU	GA	GG	UC	UU	gap	Seq
T	32.8*	20.6*	4.2*	6.9*	0.6	--	2.2	--	0.6	0.1	0.1	--	--	--	0.1	0.4	31.3	714
3	38.1*	36.6*	4.5*	5.5*	1	--	4	--	1	--	0.2	--	--	--	0.2	0.7	8.1	402
B	58.0*	27.2*	1.6	4.4	--	--	6.4*	--	1.6	--	--	--	--	--	--	--	0.8	250
A	--	--	--	2.8	11.1	--	--	--	--	--	--	--	--	--	--	8.3	77.8	36
C	88.6*	--	1.3*	10.1*	--	--	--	--	--	--	--	--	--	--	--	--	--	79
E	6.9*	68.1*	12.1*	8.6*	--	--	--	--	--	--	0.9	--	--	--	0.9	--	2.6	116
M	4.7*	--	4.7*	8.2*	--	--	--	--	--	0.4	--	--	--	--	--	--	82	233
Collective Score
Aln	Xch	Ych	PE	PES	Cov1	Cov3	C1+C3	WC	WCGU	XCons	YCons	DfDel	PNuc	Seq
T	33	39	27	0.75	0.88	0.94	1.82	0.94	0.95	-0.68	-0.68	0.02	0.47	714
3	21	27	17	0.71	0.87	0.92	1.79	0.92	0.93	-0.09	-0.07	0.01	0.59	402
B	13	13	11	0.85	0.82	0.92	1.74	0.92	0.92	0.49	0.41	0	0.76	250
A	2	0	0	0	0	0	0	0.12	0.62	-0.63	-0.43	0.02	0.2	36
C	5	6	4	0.73	1	1	2	1	1	1.43	1.45	0	0.77	79
E	6	14	6	0.6	0.94	0.98	1.92	0.98	0.98	0.51	0.56	0.01	0.43	116
M	7	6	6	0.92	0.96	0.98	1.93	0.98	0.98	-0.64	-0.58	0.08	0.14	233
Helix 4	Base Pair (44:434)		BPC: cWW	AI: --	Strong
Frequency
Aln	GC	CG	UA	AU	GU	UG	AA	AC	AG	CA	CC	CU	GA	GG	UC	UU	gap	Seq
T	2.7*	3.7*	4.2*	53.9*	1.3	0.4	1.3	1	2	0.4	0.1	--	0.8	0.6	--	0.7	26.8	712
3	3.5*	6.5*	3.0*	73.5*	1.8	0.5	2.2	1.8	3.5	0.8	0.2	--	1.5	0.5	--	0.5	0.2	400
B	0.4*	--	--	99.6*	--	--	--	--	--	--	--	--	--	--	--	--	--	249
A	5.6*	72.2*	2.8*	5.6*	--	--	--	--	--	8.3	--	--	--	--	--	5.6	--	36
C	--	--	1.3*	96.2*	2.5	--	--	--	--	--	--	--	--	--	--	--	--	79
E	9.6*	--	9.6*	38.3*	6.1	1.7	7.8	6.1	12.2	--	0.9	--	5.2	1.7	--	--	0.9	115
M	2.1*	--	7.3*	6.0*	--	0.4	--	--	--	--	--	--	--	0.9	--	1.3	81.9	233
Collective Score
Aln	Xch	Ych	PE	PES	Cov1	Cov3	C1+C3	WC	WCGU	XCons	YCons	DfDel	PNuc	Seq
T	23	36	12	0.41	0.55	0.88	1.43	0.88	0.91	-0.15	-0.23	0.03	0.5	712
3	11	26	4	0.22	0.49	0.87	1.36	0.87	0.89	0.98	0.61	0.01	0.63	400
B	1	2	1	0.67	1	1	2	1	1	1.96	1.93	0	0.76	249
A	2	2	2	1	0.5	0.86	1.36	0.86	0.86	0.99	0.75	0	0.88	36
C	2	1	1	0.67	0.33	0.97	1.31	0.97	1	1.73	1.92	0	0.77	79
E	8	22	1	0.07	0.31	0.58	0.89	0.58	0.66	0.61	0	0.01	0.43	115
M	10	9	7	0.74	0.76	0.86	1.62	0.86	0.88	-0.62	-0.61	0.07	0.14	233
Helix 4	Base Pair (45:433)		BPC: cWW	AI: --	Strong
Frequency
Aln	GC	CG	UA	AU	GU	UG	AA	AC	AG	CA	CC	CU	GA	GG	UC	UU	gap	Seq
T	47.8*	0.4*	2.5*	7.6*	1.5	1.4	0.1	1.7	--	--	0.1	--	--	--	3.2	5	28.4	713
3	68.1*	0.5*	1	5.7	2.2	2	0.2*	2.7	--	--	0.2	--	--	--	5.5	8.7*	2.8	401
B	97.2*	0.4*	--	2.4*	--	--	--	--	--	--	--	--	--	--	--	--	--	249
A	86.1*	--	--	13.9*	--	--	--	--	--	--	--	--	--	--	--	--	--	36
C	83.5*	--	--	13.9*	2.5	--	--	--	--	--	--	--	--	--	--	--	--	79
E	--	0.9*	3.4	10.3	7.8	6.9	0.9	9.5*	--	--	0.9	--	--	--	19	30.2*	10.5	116
M	0.9*	0.4*	6.0*	8.6*	--	0.9	--	0.4	--	--	--	--	--	--	0.4	0.4	81.9	233
Collective Score
Aln	Xch	Ych	PE	PES	Cov1	Cov3	C1+C3	WC	WCGU	XCons	YCons	DfDel	PNuc	Seq
T	22	34	15	0.54	0.44	0.82	1.26	0.82	0.86	-0.3	-0.28	0.04	0.49	713
3	10	21	6	0.39	0.33	0.8	1.13	0.78	0.82	0.76	0.52	0.03	0.62	401
B	2	2	2	1	1	1	2	1	1	1.8	1.82	0	0.76	249
A	2	2	2	1	1	1	2	1	1	1.42	1.43	0	0.88	36
C	3	4	2	0.57	0.85	0.97	1.82	0.97	1	1.42	1.39	0	0.77	79
E	6	17	2	0.17	0.17	0	0.17	0.16	0.33	0.39	-0.23	0.07	0.4	116
M	9	9	7	0.78	0.77	0.88	1.65	0.88	0.93	-0.57	-0.59	0.07	0.14	233
Helix 4.1	Base Pair (46:179)		BPC: cWW	AI: --	Strong
Frequency
Aln	GC	CG	UA	AU	GU	UG	AA	AC	AG	CA	CC	CU	GA	GG	UC	UU	gap	Seq
T	24.2*	16.1*	2.9	0.6	--	0.1	5.3*	--	3.9	0.7	--	--	0.7	0.3	0.1	0.7*	44.1	714
3	40.0*	28.6*	4.2*	--	--	--	--	--	--	--	--	--	--	0.5	--	--	26.5	402
B	63.6*	32.4*	2.8*	--	--	--	--	--	--	--	--	--	--	0.8	--	--	0.4	250
A	5.6*	94.4*	--	--	--	--	--	--	--	--	--	--	--	--	--	--	--	36
C	10.1*	--	3.8	--	--	1.3*	44.3*	--	34.2	2.5	--	--	--	--	--	--	3.8	79
E	--	--	8.6	--	--	--	--	--	--	--	--	--	--	--	--	--	91.4	116
M	1.7	--	0.4	1.7	--	--	1.3	--	0.4*	1.3	--	--	2.1*	--	0.4	2.1*	88.3	233
Collective Score
Aln	Xch	Ych	PE	PES	Cov1	Cov3	C1+C3	WC	WCGU	XCons	YCons	DfDel	PNuc	Seq
T	19	40	11	0.37	0.7	0.83	1.53	0.79	0.79	-0.86	-0.65	0.07	0.38	714
3	6	23	6	0.41	0.98	0.99	1.98	0.99	0.99	-0.28	0.28	0.17	0.47	402
B	5	4	5	1	0.98	0.99	1.97	0.99	0.99	0.92	0.8	0.01	0.76	250
A	1	1	1	1	1	1	2	1	1	1.69	1.69	0	0.88	36
C	4	11	0	0	0.22	0.58	0.8	0.14	0.16	1.08	0.42	0.03	0.74	79
E	0	18	0	0	0	0	0	1	1	-0.25	0.73	0.41	0.04	116
M	9	6	5	0.67	0.27	0.41	0.68	0.33	0.33	-0.63	-0.49	0.08	0.09	233
Helix 4.1	Base Pair (47:178)		BPC: cWW	AI: --	Strong
Frequency
Aln	GC	CG	UA	AU	GU	UG	AA	AC	AG	CA	CC	CU	GA	GG	UC	UU	gap	Seq
T	0.1	64.3*	0.8*	0.6	0.7*	1.3	0.1	--	--	--	--	--	--	--	--	--	32.1	711
3	--	95.7*	1.0*	0.5*	--	2.3	--	--	--	--	--	--	--	--	--	--	0.6	399
B	--	98.8	--	--	--	1.2	--	--	--	--	--	--	--	--	--	--	--	249
A	--	69.4*	8.3*	5.6*	--	16.7	--	--	--	--	--	--	--	--	--	--	--	36
C	--	94.9*	1.3*	--	--	--	1.3	--	--	--	--	--	--	--	--	--	2.5	79
E	--	97.4*	0.9*	--	--	--	--	--	--	--	--	--	--	--	--	--	1.8	114
M	0.4	--	0.4*	0.9	2.1*	--	--	--	--	--	--	--	--	--	--	--	96.1	233
Collective Score
Aln	Xch	Ych	PE	PES	Cov1	Cov3	C1+C3	WC	WCGU	XCons	YCons	DfDel	PNuc	Seq
T	12	7	4	0.42	0.42	0.97	1.39	0.97	1	0.15	0.35	0.03	0.46	711
3	5	4	2	0.44	0.4	0.98	1.38	0.98	1	1.72	1.79	0	0.63	399
B	1	1	0	0	0	0	0	0.99	1	1.91	1.97	0	0.76	249
A	3	1	1	0.5	0.46	0.83	1.29	0.83	1	0.9	1.28	0	0.88	36
C	2	2	1	0.5	0.5	0.99	1.49	0.99	0.99	1.8	1.54	0.02	0.75	79
E	1	2	1	0.67	1	1	2	1	1	1.84	1.72	0	0.43	114
M	5	1	1	0.33	0.25	0.67	0.92	0.44	1	-0.51	-0.26	0.08	0.03	233
Helix 5	Base Pair (53:117)		BPC: tHS	AI: B	Significant
Frequency
Aln	GC	CG	UA	AU	GU	UG	AA	AC	AG	CA	CC	CU	GA	GG	UC	UU	gap	Seq
T	--	0.4	1.5*	2.1	--	--	0.8	0.3	66.2*	--	--	--	--	0.1	--	0.3	28.1	719
3	--	0.5	--	1.5	--	--	--	--	97.5	--	--	--	--	0.2	--	--	0.2	405
B	--	--	--	--	--	--	--	--	100	--	--	--	--	--	--	--	--	252
A	--	5.6	--	11.1	--	--	--	--	83.3	--	--	--	--	--	--	--	--	36
C	--	--	--	--	--	--	6.2	--	93.8	--	--	--	--	--	--	--	--	81
E	--	--	--	1.7	--	--	--	--	96.6	--	--	--	--	0.9	--	--	0.9	117
M	--	0.4*	4.7*	3.9*	--	--	0.4	0.9	2.1	--	--	--	--	--	--	0.9	86.6	233
Collective Score
Aln	Xch	Ych	PE	PES	Cov1	Cov3	C1+C3	WC	WCGU	XCons	YCons	DfDel	PNuc	Seq
T	12	11	6	0.52	0.28	0.94	1.22	0.06	0.06	0.42	0.29	0.01	0.49	719
3	2	2	0	0	0	0	0	0.02	0.02	1.9	1.86	0	0.64	405
B	0	0	0	0	0	0	0	0	0	2	2	0	0.77	252
A	1	1	0	0	0	0	0	0.17	0.17	1.69	1.5	0	0.88	36
C	0	2	0	0	0	0	0	0	0	2	1.71	0	0.79	81
E	1	1	0	0	0	0	0	0.02	0.02	1.84	1.79	0	0.44	117
M	10	7	6	0.71	0.5	0.68	1.18	0.68	0.68	-0.51	-0.56	0.02	0.1	233
Helix 5	Base Pair (54:116)		BPC: cWW	AI: --	Strong
Frequency
Aln	GC	CG	UA	AU	GU	UG	AA	AC	AG	CA	CC	CU	GA	GG	UC	UU	gap	Seq
T	56.1*	0.1*	0.6*	2.9*	12.1	--	--	--	--	--	--	--	0.1	--	--	--	28	720
3	75.6*	--	--	2.5*	21.4	--	--	--	--	--	--	--	0.2	--	--	--	0.2	406
B	95.7*	--	--	4.0*	0.4	--	--	--	--	--	--	--	--	--	--	--	--	253
A	100	--	--	--	--	--	--	--	--	--	--	--	--	--	--	--	--	36
C	98.8*	--	--	1.2*	--	--	--	--	--	--	--	--	--	--	--	--	--	81
E	24.8	--	--	--	73.5	--	--	--	--	--	--	--	0.9	--	--	--	0.9	117
M	7.3*	0.4*	1.7*	4.3*	--	--	--	--	--	--	--	--	--	--	--	--	86.3	233
Collective Score
Aln	Xch	Ych	PE	PES	Cov1	Cov3	C1+C3	WC	WCGU	XCons	YCons	DfDel	PNuc	Seq
T	12	16	10	0.71	0.23	0.83	1.06	0.83	1	0.35	0.01	0.01	0.5	720
3	2	7	2	0.44	0.1	0	0.1	0.78	1	1.8	1.14	0	0.64	406
B	2	3	2	0.8	0.91	1	1.91	1	1	1.76	1.75	0	0.78	253
A	0	0	0	0	0	0	0	1	1	2	2	0	0.88	36
C	1	2	1	0.67	1	1	2	1	1	1.9	1.86	0	0.79	81
E	0	4	0	0	0	0	0	0.25	0.99	1.91	1	0	0.44	117
M	9	7	7	0.88	1	1	2	1	1	-0.58	-0.54	0.02	0.1	233
Helix 5	Base Pair (55:115)		BPC: cWW	AI: --	Strong
Frequency
Aln	GC	CG	UA	AU	GU	UG	AA	AC	AG	CA	CC	CU	GA	GG	UC	UU	gap	Seq
T	58.1*	0.4*	--	12.4*	1	--	--	--	0.1	--	--	--	0.1	--	--	--	27.7	724
3	77.0*	0.2*	--	21.2*	1.2	--	--	--	--	--	--	--	--	--	--	--	0.2	405
B	99.6	--	--	--	0.4	--	--	--	--	--	--	--	--	--	--	--	--	252
A	100	--	--	--	--	--	--	--	--	--	--	--	--	--	--	--	--	36
C	100	--	--	--	--	--	--	--	--	--	--	--	--	--	--	--	--	86
E	21.4*	0.9*	--	73.5*	3.4	--	--	--	--	--	--	--	--	--	--	--	0.9	117
M	9.9*	0.9*	--	1.7*	0.9	--	--	--	0.4	--	--	--	0.4	--	--	--	85.8	233
Collective Score
Aln	Xch	Ych	PE	PES	Cov1	Cov3	C1+C3	WC	WCGU	XCons	YCons	DfDel	PNuc	Seq
T	13	7	4	0.4	0.91	0.98	1.9	0.98	1	0.09	0.06	0.01	0.5	724
3	7	4	2	0.36	0.95	0.99	1.93	0.99	1	1.2	1.16	0	0.64	405
B	0	0	0	0	0	0	0	1	1	2	1.96	0	0.77	252
A	0	0	0	0	0	0	0	1	1	2	2	0	0.88	36
C	0	0	0	0	0	0	0	1	1	2	2	0	0.83	86
E	7	4	2	0.36	0.87	0.97	1.83	0.97	1	1.04	1.04	0	0.44	117
M	6	3	2	0.44	0.6	0.88	1.48	0.88	0.94	-0.5	-0.48	0.03	0.11	233
Helix 5	Base Pair (56:114)		BPC: cWW	AI: --	Strong
Frequency
Aln	GC	CG	UA	AU	GU	UG	AA	AC	AG	CA	CC	CU	GA	GG	UC	UU	gap	Seq
T	16.6*	2.1*	2.2*	49.9*	0.1	0.4	0.3	0.4	0.1	--	--	--	--	--	--	0.1	27.7	725
3	8.9*	3.7*	3.0*	83.7*	0.2	--	--	0.2	--	--	--	--	--	--	--	--	0.2	406
B	3.2*	--	2.4*	93.7*	0.4	--	--	0.4	--	--	--	--	--	--	--	--	--	253
A	55.6*	13.9*	--	30.6*	--	--	--	--	--	--	--	--	--	--	--	--	--	36
C	94.2*	--	--	4.7*	--	--	--	1.2	--	--	--	--	--	--	--	--	--	86
E	6.8*	8.5*	5.1*	78.6*	--	--	--	--	--	--	--	--	--	--	--	--	0.9	117
M	1.3*	--	1.7*	7.7*	--	1.3	0.9	0.4	0.4	--	--	--	--	--	--	0.4	85.9	233
Collective Score
Aln	Xch	Ych	PE	PES	Cov1	Cov3	C1+C3	WC	WCGU	XCons	YCons	DfDel	PNuc	Seq
T	21	25	19	0.83	0.93	0.98	1.91	0.98	0.99	-0.25	-0.26	0.01	0.5	725
3	12	17	12	0.83	0.97	0.99	1.96	0.99	1	1.1	1.12	0	0.64	406
B	4	6	2	0.4	0.88	0.99	1.87	0.99	1	1.62	1.6	0	0.78	253
A	5	5	5	1	1	1	2	1	1	0.61	0.61	0	0.88	36
C	2	2	1	0.5	0.8	0.99	1.79	0.99	0.99	1.68	1.76	0	0.83	86
E	3	6	5	1	1	1	2	1	1	0.81	0.85	0	0.44	117
M	7	6	6	0.92	0.47	0.76	1.22	0.76	0.85	-0.55	-0.54	0.02	0.11	233
Helix 6	Base Pair (57:70)		BPC: cWW	AI: --	Strong
Frequency
Aln	GC	CG	UA	AU	GU	UG	AA	AC	AG	CA	CC	CU	GA	GG	UC	UU	gap	Seq
T	0.3*	65.7*	4.8*	1.5*	--	0.4	0.1	--	--	0.1	--	--	--	--	--	--	27	726
3	--	91.4*	7.9*	--	--	0.2	--	--	--	--	--	--	--	--	--	--	0.4	406
B	--	86.9*	12.7*	--	--	0.4	--	--	--	--	--	--	--	--	--	--	--	252
A	--	100	--	--	--	--	--	--	--	--	--	--	--	--	--	--	--	36
C	--	97.7	--	--	--	2.3	--	--	--	--	--	--	--	--	--	--	--	87
E	--	98.3	--	--	--	--	--	--	--	--	--	--	--	--	--	--	1.6	118
M	0.9*	9.0*	1.3*	4.7*	--	--	0.4	--	--	0.4	--	--	--	--	--	--	83.3	233
Collective Score
Aln	Xch	Ych	PE	PES	Cov1	Cov3	C1+C3	WC	WCGU	XCons	YCons	DfDel	PNuc	Seq
T	9	6	7	0.93	0.91	0.99	1.9	0.99	1	0.21	0.25	0	0.51	726
3	2	1	1	0.67	0.97	1	1.97	1	1	1.56	1.53	0	0.64	406
B	2	1	1	0.67	0.97	1	1.97	1	1	1.44	1.46	0	0.77	252
A	0	0	0	0	0	0	0	1	1	2	2	0	0.88	36
C	1	0	0	0	0	0	0	0.98	1	1.84	2	0	0.84	87
E	0	0	0	0	0	0	0	1	1	1.91	1.78	0.01	0.44	118
M	6	5	6	1	0.89	0.95	1.84	0.95	0.95	-0.57	-0.58	0	0.12	233
Helix 6	Base Pair (58:69)		BPC: cWW	AI: --	Strong
Frequency
Aln	GC	CG	UA	AU	GU	UG	AA	AC	AG	CA	CC	CU	GA	GG	UC	UU	gap	Seq
T	70.7*	--	1.0*	0.5*	0.5	--	0.1	0.5	--	--	--	--	--	--	--	--	26.6	733
3	98.5*	--	--	0.2*	0.7	--	--	0.2	--	--	--	--	--	--	--	--	0.2	406
B	100	--	--	--	--	--	--	--	--	--	--	--	--	--	--	--	--	252
A	100	--	--	--	--	--	--	--	--	--	--	--	--	--	--	--	--	36
C	100	--	--	--	--	--	--	--	--	--	--	--	--	--	--	--	--	94
E	94.9*	--	--	0.8*	2.5	--	--	0.8	--	--	--	--	--	--	--	--	0.8	118
M	10.3*	--	3.0*	1.3*	0.4	--	0.4	1.3	--	--	--	--	--	--	--	--	83.3	233
Collective Score
Aln	Xch	Ych	PE	PES	Cov1	Cov3	C1+C3	WC	WCGU	XCons	YCons	DfDel	PNuc	Seq
T	4	7	3	0.55	0.55	0.98	1.53	0.98	0.99	0.47	0.46	0	0.52	733
3	2	3	1	0.4	0.2	0	0.2	0.99	1	1.93	1.84	0	0.64	406
B	0	0	0	0	0	0	0	1	1	2	2	0	0.77	252
A	0	0	0	0	0	0	0	1	1	2	2	0	0.88	36
C	0	0	0	0	0	0	0	1	1	2	2	0	0.91	94
E	2	3	1	0.4	0.2	0	0.2	0.97	0.99	1.81	1.56	0.01	0.45	118
M	2	4	2	0.67	0.67	0.87	1.54	0.87	0.9	-0.54	-0.51	0	0.12	233
Helix 6	Base Pair (59:68)		BPC: cWW	AI: --	Strong
Frequency
Aln	GC	CG	UA	AU	GU	UG	AA	AC	AG	CA	CC	CU	GA	GG	UC	UU	gap	Seq
T	4.6*	29.7*	14.1*	1.4*	--	23.4	0.1	0.1	--	--	--	--	--	--	--	--	26.5	735
3	8.3*	40.7	9.8	--	--	40.9*	--	--	--	--	--	--	--	--	--	--	0.2	408
B	13.4*	27.2	11	--	--	48.4*	--	--	--	--	--	--	--	--	--	--	--	254
A	--	19.4	--	--	--	80.6	--	--	--	--	--	--	--	--	--	--	--	36
C	--	45.7*	53.2*	--	--	1.1	--	--	--	--	--	--	--	--	--	--	--	94
E	--	76.3*	10.2*	--	--	12.7	--	--	--	--	--	--	--	--	--	--	0.8	118
M	--	3.9*	6.0*	4.3*	--	1.7	0.4	0.4	--	--	--	--	--	--	--	--	83.3	233
Collective Score
Aln	Xch	Ych	PE	PES	Cov1	Cov3	C1+C3	WC	WCGU	XCons	YCons	DfDel	PNuc	Seq
T	25	21	15	0.65	0.46	0.68	1.14	0.68	1	-0.39	-0.22	0	0.52	735
3	14	9	5	0.43	0.14	0	0.14	0.59	1	0.68	1.06	0	0.65	408
B	8	6	3	0.43	0.26	0.62	0.88	0.52	1	0.66	0.95	0	0.78	254
A	1	0	0	0	0	0	0	0.19	1	1.29	2	0	0.88	36
C	5	6	4	0.73	0.98	0.99	1.97	0.99	1	1	1	0	0.91	94
E	5	3	2	0.5	0.44	0.87	1.32	0.87	1	1.22	1.31	0.01	0.45	118
M	6	6	6	1	0.76	0.85	1.61	0.85	0.95	-0.57	-0.6	0	0.12	233
Helix 6.1	Base Pair (61:93)		BPC: cWW	AI: K	Strong
Frequency
Aln	GC	CG	UA	AU	GU	UG	AA	AC	AG	CA	CC	CU	GA	GG	UC	UU	gap	Seq
T	23.0*	8.3*	5.0*	9.9*	2	0.3	0.4	3.1	0.3	--	0.1	--	0.7	0.4	0.4	0.8	45	734
3	26.0*	14.3*	8.8*	15.7*	--	0.5	--	5.7	--	--	--	--	0.2	0.2	--	--	28.5	407
B	32.7*	18.5*	14.2*	25.2*	--	0.4	--	9.1	--	--	--	--	--	--	--	--	--	254
A	63.9*	30.6*	--	--	--	--	--	--	--	--	--	--	2.8	2.8	--	--	--	36
C	67.0*	3.2*	--	7.4*	16	--	--	--	--	--	--	--	2.1	--	2.1	--	2.2	94
E	--	--	--	--	--	0.9	--	--	--	--	--	--	--	--	--	--	99.1	117
M	--	--	0.4	0.9	--	--	1.3*	--	0.9	--	0.4*	--	0.9	0.9*	0.4	2.6*	91.5	233
Collective Score
Aln	Xch	Ych	PE	PES	Cov1	Cov3	C1+C3	WC	WCGU	XCons	YCons	DfDel	PNuc	Seq
T	36	33	21	0.61	0.73	0.84	1.57	0.84	0.89	-0.6	-0.87	0.12	0.39	734
3	22	20	13	0.62	0.85	0.91	1.76	0.91	0.91	0.29	-0.76	0.19	0.46	407
B	16	17	12	0.73	0.86	0.91	1.76	0.91	0.91	0.09	0.12	0	0.78	254
A	1	3	1	0.5	0.85	0.94	1.79	0.94	0.94	1.11	0.92	0	0.88	36
C	5	7	3	0.5	0.34	0.79	1.14	0.79	0.96	1.13	0.8	0	0.89	94
E	5	0	0	0	0	0	0	0	1	1.38	-0.05	0.45	0	117
M	9	6	5	0.67	0.43	0.6	1.03	0.15	0.15	-0.55	-0.5	0.02	0.06	233
Helix 6.1	Base Pair (62:92)		BPC: cWW	AI: K	Strong
Frequency
Aln	GC	CG	UA	AU	GU	UG	AA	AC	AG	CA	CC	CU	GA	GG	UC	UU	gap	Seq
T	3.1*	15.2*	13.3*	1.5*	0.3	0.7	10.4	--	1.2	0.9	0.4	0.3	0.7	0.4	--	7.9	43.8	738
3	5.6*	25.1*	19.8*	1.0*	0.2	0.5	4.1	--	1.2	0.2	0.2	--	1	0.2	--	12.2	28.5	410
B	8.9*	26.8*	31.1*	1.6*	0.4	0.8	6.6	--	1.9	0.4	--	--	1.6	--	--	19.5	0.4	257
A	--	94.4*	2.8*	--	--	--	--	--	--	--	2.8	--	--	--	--	--	--	36
C	--	8.4*	15.8	2.1	--	--	57.9*	--	4.2	6.3	--	--	--	1.1	--	3.2*	1.1	95
E	--	--	--	--	--	--	--	--	--	--	--	--	--	0.9	--	--	99.1	117
M	--	0.4	0.9	2.1*	0.4	1.3*	2.1	--	--	--	0.9*	0.9	0.4*	0.4	--	2.1	88	233
Collective Score
Aln	Xch	Ych	PE	PES	Cov1	Cov3	C1+C3	WC	WCGU	XCons	YCons	DfDel	PNuc	Seq
T	42	27	17	0.49	0.44	0.59	1.02	0.59	0.6	-0.67	-0.83	0.12	0.4	738
3	23	14	10	0.54	0.57	0.72	1.29	0.72	0.73	0.41	-0.73	0.19	0.47	410
B	15	12	9	0.67	0.55	0.69	1.23	0.69	0.7	0.3	0.12	0	0.79	257
A	1	2	1	0.67	0.5	0.97	1.47	0.97	0.97	1.82	1.64	0	0.88	36
C	10	7	4	0.47	0.28	0.7	0.98	0.27	0.27	0.65	1.02	0.01	0.91	95
E	7	0	0	0	0	0	0	0	0	1.23	-0.05	0.45	0	117
M	9	6	3	0.4	0.35	0.46	0.81	0.29	0.43	-0.59	-0.53	0.02	0.09	233
Helix 6.1	Base Pair (64:90)		BPC: cWW	AI: K	Significant
Frequency
Aln	GC	CG	UA	AU	GU	UG	AA	AC	AG	CA	CC	CU	GA	GG	UC	UU	gap	Seq
T	7.8*	3.0*	0.5	13.6	0.1	0.1	23.2*	4.6	0.7	--	0.3	0.3	0.4	0.3	--	0.5*	44.5	740
3	14.1*	5.1*	0.7	22.1	--	0.2	29.0*	--	--	--	--	--	--	0.2	--	--	28.4	411
B	22.6*	8.2*	0.8*	35.4*	--	0.4	32.3	--	--	--	--	--	--	0.4	--	--	--	257
A	--	--	--	--	--	--	100	--	--	--	--	--	--	--	--	--	--	36
C	--	--	--	5.2	--	--	54.2*	34.4	1	--	--	--	--	1.0*	--	1.0*	3.1	96
E	--	--	0.8	--	--	--	--	--	--	--	--	--	--	--	--	--	99.1	118
M	--	0.4	0.4	2.1*	0.4	--	0.4	0.4	1.7	--	0.9*	0.9	1.3*	--	--	1.3	89.7	233
Collective Score
Aln	Xch	Ych	PE	PES	Cov1	Cov3	C1+C3	WC	WCGU	XCons	YCons	DfDel	PNuc	Seq
T	23	25	11	0.46	0.35	0.62	0.97	0.45	0.46	-0.16	-0.86	0.12	0.39	740
3	15	11	8	0.61	0.45	0.67	1.12	0.59	0.59	0.89	-0.72	0.19	0.47	411
B	11	11	8	0.73	0.49	0.67	1.16	0.67	0.67	0.76	0.15	0	0.79	257
A	0	0	0	0	0	0	0	0	0	2	2	0	0.88	36
C	2	8	1	0.2	0.05	0	0.05	0.05	0.05	1.57	0.66	0.03	0.9	96
E	4	0	0	0	0	0	0	1	1	1.04	-0.05	0.45	0	118
M	6	6	2	0.33	0.26	0.42	0.68	0.29	0.33	-0.57	-0.5	0.03	0.08	233
Helix 6.1	Base Pair (65:89)		BPC: cWW	AI: K	Strong
Frequency
Aln	GC	CG	UA	AU	GU	UG	AA	AC	AG	CA	CC	CU	GA	GG	UC	UU	gap	Seq
T	10.4*	24.5*	4.9*	9.1*	2.8	--	0.1	0.1	0.4	0.1	--	--	1.9	0.3	0.3	0.1	44.9	740
3	18.5*	24.8*	7.1*	15.1*	5.1	--	--	--	--	--	--	--	--	0.5	0.2	0.2	28.5	411
B	15.6*	39.7*	11.3*	24.1*	8.2	--	--	--	--	--	--	--	--	0.8	--	0.4	--	257
A	100	--	--	--	--	--	--	--	--	--	--	--	--	--	--	--	--	36
C	--	81.2*	6.2	2.1*	--	--	--	--	--	--	--	--	8.3*	--	1.0*	--	1	96
E	--	--	--	--	--	--	--	--	--	--	--	--	--	--	0.8	--	99.1	118
M	0.4	0.4	0.4	1.3	--	--	0.4	0.4	1.3*	0.4	--	--	2.6*	--	--	--	92.1	233
Collective Score
Aln	Xch	Ych	PE	PES	Cov1	Cov3	C1+C3	WC	WCGU	XCons	YCons	DfDel	PNuc	Seq
T	26	25	20	0.78	0.8	0.89	1.68	0.89	0.94	-0.75	-0.9	0.11	0.39	740
3	15	17	14	0.88	0.87	0.92	1.78	0.92	0.99	0.14	-0.78	0.19	0.47	411
B	15	17	14	0.88	0.84	0.91	1.75	0.91	0.99	0.12	0.17	0	0.79	257
A	0	0	0	0	0	0	0	1	1	2	2	0	0.88	36
C	5	4	4	0.89	0.65	0.94	1.58	0.91	0.91	0.98	1.2	0.01	0.92	96
E	0	0	0	0	0	0	0	0	0	1.26	-0.05	0.45	0	118
M	6	4	2	0.4	0.25	0.5	0.75	0.33	0.33	-0.49	-0.46	0.01	0.06	233
Helix 6.1	Base Pair (66:88)		BPC: cWW	AI: K	Weak
Frequency
Aln	GC	CG	UA	AU	GU	UG	AA	AC	AG	CA	CC	CU	GA	GG	UC	UU	gap	Seq
T	0.1*	49.5*	1.5*	0.5*	0.1	0.8	0.1	--	0.9	0.1	0.3	--	0.3	0.3	0.3	0.3	44.8	740
3	--	67.4*	1.5*	--	--	1.5	0.2	--	0.2	0.2	--	--	--	0.5	--	--	28.5	411
B	--	94.6*	1.6*	--	--	2.3	0.4	--	0.4	--	--	--	--	0.8	--	--	--	257
A	--	94.4*	5.6*	--	--	--	--	--	--	--	--	--	--	--	--	--	--	36
C	--	92.7*	3.1*	--	--	--	--	--	--	--	1	--	--	--	2.1	--	1	96
E	--	--	--	--	--	--	--	--	--	0.8	--	--	--	--	--	--	99.1	118
M	0.4	--	0.9*	1.7	0.4*	--	--	--	2.6*	--	0.4*	--	0.9	--	--	0.9	91.7	233
Collective Score
Aln	Xch	Ych	PE	PES	Cov1	Cov3	C1+C3	WC	WCGU	XCons	YCons	DfDel	PNuc	Seq
T	15	8	3	0.26	0.38	0.94	1.32	0.94	0.95	-0.29	-0.15	0.12	0.39	740
3	10	2	1	0.17	0.35	0.96	1.32	0.96	0.98	0.75	0.43	0.19	0.47	411
B	2	1	0	0	0.29	0.96	1.25	0.96	0.98	1.63	1.86	0	0.79	257
A	1	1	1	1	1	1	2	1	1	1.69	1.69	0	0.88	36
C	2	2	1	0.5	0.5	0.97	1.47	0.97	0.97	1.66	1.51	0.01	0.92	96
E	7	0	0	0	0	0	0	0	0	0.25	-0.05	0.45	0	118
M	3	4	1	0.29	0.39	0.58	0.96	0.37	0.42	-0.48	-0.47	0.02	0.06	233
Helix 6.2	Base Pair (67:74)		BPC: cWH	AI: K	Strong
Frequency
Aln	GC	CG	UA	AU	GU	UG	AA	AC	AG	CA	CC	CU	GA	GG	UC	UU	gap	Seq
T	9.9*	1.5*	34.7*	6.9*	6.2	0.8	0.7	0.1	0.1	0.5	0.5	0.4	0.8	0.5	7.3	1.8	27.1	740
3	2.2*	2.2*	60.3*	8.5*	6.3	1.5	--	--	--	0.7	1	--	0.2	--	13.1	2.7	1.1	411
B	2.7*	2.7*	71.9*	10.5*	6.6	--	--	--	--	0.4	--	--	0.4	--	0.4	3.9	0.4	256
A	2.8	--	75.0*	8.3	11.1*	--	--	--	--	--	--	--	--	--	--	--	2.8	36
C	63.5*	2.1*	3.1*	9.4*	19.8	--	1	--	--	--	--	--	1	--	--	--	--	96
E	0.8	1.7*	31.1	4.2*	4.2	5	--	--	--	1.7	3.4	--	--	--	44.5*	0.8	2.5	119
M	1.3	--	2.6*	3.0*	0.4	--	1.7	0.4	0.4	0.4	--	1.3	1.7	1.7*	--	0.9	84.1	233
Collective Score
Aln	Xch	Ych	PE	PES	Cov1	Cov3	C1+C3	WC	WCGU	XCons	YCons	DfDel	PNuc	Seq
T	33	37	15	0.43	0.48	0.73	1.21	0.73	0.82	-0.45	-0.59	0	0.52	740
3	17	20	6	0.32	0.34	0.74	1.08	0.74	0.82	0.84	0.45	0	0.64	411
B	8	10	3	0.33	0.58	0.88	1.46	0.88	0.95	0.84	0.9	0	0.78	256
A	2	2	1	0.5	0.5	0.89	1.39	0.89	1	0.8	1.06	0.02	0.85	36
C	8	11	7	0.74	0.4	0.78	1.18	0.78	0.98	1.18	0.73	0	0.93	96
E	7	8	2	0.27	0.11	0	0.11	0.39	0.48	0.97	0.16	0.01	0.44	119
M	8	6	2	0.29	0.33	0.46	0.79	0.43	0.46	-0.61	-0.62	0	0.12	233
Helix 7	Base Pair (76:110)		BPC: cWW	AI: --	Strong
Frequency
Aln	GC	CG	UA	AU	GU	UG	AA	AC	AG	CA	CC	CU	GA	GG	UC	UU	gap	Seq
T	0.9*	52.3*	3.5*	0.3*	--	8.3	0.3	--	0.1	2.3	0.7	0.1	--	0.7	1.3	0.4	28.7	745
3	0.5*	69.7*	2.4*	0.2*	--	14.5	--	--	--	4.1	1.2	0.2	--	1	2.4	0.5	3.1	413
B	0.8*	96.5*	0.4*	0.4*	--	0.8	--	--	--	0.4	--	--	--	0.4	0.4	--	--	258
A	--	100	--	--	--	--	--	--	--	--	--	--	--	--	--	--	--	36
C	--	94.9*	4.1*	--	--	--	--	--	--	--	--	--	--	1	--	--	--	98
E	4.2*	2.5	7.6	--	--	48.7*	--	--	--	13.4*	--	0.8	--	2.5	7.6	1.7	10.9	119
M	2.1*	3.8*	5.1*	0.4*	--	0.9	0.9	--	0.4	--	--	--	--	--	--	0.4	86	234
Collective Score
Aln	Xch	Ych	PE	PES	Cov1	Cov3	C1+C3	WC	WCGU	XCons	YCons	DfDel	PNuc	Seq
T	25	14	8	0.41	0.25	0.8	1.05	0.8	0.92	-0.09	0.01	0	0.51	745
3	14	7	4	0.38	0.12	0	0.12	0.75	0.9	0.98	1.09	0	0.64	413
B	6	5	4	0.73	0.44	0.98	1.43	0.98	0.99	1.76	1.81	0	0.79	258
A	0	0	0	0	0	0	0	1	1	2	2	0	0.88	36
C	3	2	2	0.8	0.8	0.99	1.79	0.99	0.99	1.67	1.76	0	0.95	98
E	8	2	0	0	0.44	0.74	1.18	0.16	0.71	0.48	0.04	0	0.4	119
M	8	5	2	0.31	0.71	0.82	1.53	0.82	0.88	-0.61	-0.55	0.02	0.11	234
Helix 7	Base Pair (77:109)		BPC: cWW	AI: --	Strong
Frequency
Aln	GC	CG	UA	AU	GU	UG	AA	AC	AG	CA	CC	CU	GA	GG	UC	UU	gap	Seq
T	7.1	13.7*	37.3*	1.9	0.4*	0.4	0.1	8.6*	--	--	0.7	0.3	--	--	0.4	--	29.2	745
3	12.1	21.8*	42.9*	1.2	0.5*	--	0.2	15.5*	--	--	1.2	0.5	--	--	0.2	--	3.8	413
B	9.7*	24.0*	65.1*	0.8*	--	--	0.4	--	--	--	--	--	--	--	--	--	--	258
A	--	77.8*	22.2*	--	--	--	--	--	--	--	--	--	--	--	--	--	--	36
C	--	2.0*	93.9*	--	1.0*	1	--	--	--	--	--	--	--	--	2	--	--	98
E	22.7	2.5*	0.8*	3.4	2.5*	--	--	53.8*	--	--	4.2	1.7	--	--	0.8	--	7.5	119
M	1.3*	4.3*	3.8*	3.8*	--	0.9	--	--	--	--	--	--	--	--	--	--	86	234
Collective Score
Aln	Xch	Ych	PE	PES	Cov1	Cov3	C1+C3	WC	WCGU	XCons	YCons	DfDel	PNuc	Seq
T	35	36	28	0.79	0.68	0.85	1.52	0.85	0.86	-0.65	-0.59	0.01	0.51	745
3	25	24	19	0.78	0.71	0.84	1.55	0.81	0.82	-0.09	0.24	0.02	0.63	413
B	17	17	16	0.94	0.99	1	1.99	1	1	0.7	0.73	0	0.79	258
A	2	2	2	1	1	1	2	1	1	1.24	1.24	0	0.88	36
C	2	5	2	0.57	0.5	0.97	1.47	0.96	0.98	1.77	1.58	0	0.95	98
E	6	5	1	0.18	0.15	0	0.15	0.32	0.34	0.21	1.07	0.03	0.42	119
M	8	7	7	0.93	0.91	0.94	1.85	0.94	1	-0.62	-0.57	0.02	0.11	234
Helix 7	Base Pair (78:108)		BPC: cWW	AI: --	Strong
Frequency
Aln	GC	CG	UA	AU	GU	UG	AA	AC	AG	CA	CC	CU	GA	GG	UC	UU	gap	Seq
T	4.0*	11	15.4	9.7*	1.1	17.6*	0.3	--	--	0.3*	0.3	0.1	0.8	0.3	0.1	0.3	38.7	745
3	6.5*	17.7	13.6	12.1*	1.7	23.5*	0.2	--	--	0.5*	0.5	0.2	1.5	0.5	0.2	--	21.3	413
B	6.6*	17.8	19.4	15.5*	2.3	37.6*	--	--	--	0.4*	--	0.4	--	--	--	--	--	258
A	2.8*	75.0*	16.7*	5.6*	--	--	--	--	--	--	--	--	--	--	--	--	--	36
C	--	9.2*	54.1*	--	--	34.7	--	--	--	--	--	--	--	--	--	2	--	98
E	11.8*	1.7*	10.1*	45.4*	15.1	1.7	1.7	1.7	--	--	--	--	--	--	0.8	2.5	7.5	119
M	1.3*	--	2.6*	9.4*	0.4	--	0.4	--	--	--	--	--	--	--	--	--	85.9	234
Collective Score
Aln	Xch	Ych	PE	PES	Cov1	Cov3	C1+C3	WC	WCGU	XCons	YCons	DfDel	PNuc	Seq
T	43	51	24	0.51	0.32	0.52	0.83	0.66	0.96	-0.77	-0.7	0.08	0.44	745
3	34	34	18	0.53	0.35	0.54	0.89	0.63	0.95	-0.6	0.18	0.14	0.52	413
B	29	24	13	0.49	0.36	0.6	0.96	0.59	0.99	0.36	0.37	0	0.79	258
A	3	3	3	1	1	1	2	1	1	0.88	0.88	0	0.88	36
C	5	12	2	0.23	0.2	0	0.2	0.63	0.98	1.56	0.88	0	0.95	98
E	2	7	2	0.44	0.5	0.74	1.25	0.74	0.93	0.05	0.48	0.03	0.42	119
M	4	5	4	0.89	0.82	0.94	1.76	0.94	0.97	-0.5	-0.47	0.02	0.11	234
Helix 7	Base Pair (79:107)		BPC: cWW	AI: --	Strong
Frequency
Aln	GC	CG	UA	AU	GU	UG	AA	AC	AG	CA	CC	CU	GA	GG	UC	UU	gap	Seq
T	6.7*	37.7*	11.0*	2.7*	--	2.8	6.6	--	0.1	--	--	0.1	2.7	0.5	0.7	0.1	28.2	745
3	10.9*	47.0*	14.0*	2.4*	--	3.9	11.9	--	0.2	--	--	0.2	4.8	1	1.2	0.2	2.2	413
B	9.3*	72.1*	12.4*	1.9*	--	3.9	--	--	--	--	--	--	--	0.4	--	--	--	258
A	58.3*	16.7*	11.1*	13.9*	--	--	--	--	--	--	--	--	--	--	--	--	--	36
C	2.0*	86.7*	8.2*	2.0*	--	1	--	--	--	--	--	--	--	--	--	--	--	98
E	4.2*	1.7*	76.5*	--	0.8	7.6	--	--	--	--	--	0.8	0.8	0.8	--	--	6.7	119
M	1.3*	0.9*	6.8*	3.4*	--	1.7	--	--	--	--	--	--	--	--	--	--	85.8	234
Collective Score
Aln	Xch	Ych	PE	PES	Cov1	Cov3	C1+C3	WC	WCGU	XCons	YCons	DfDel	PNuc	Seq
T	43	35	25	0.64	0.6	0.81	1.41	0.81	0.85	-0.66	-0.49	0	0.51	745
3	32	24	16	0.57	0.54	0.76	1.3	0.76	0.8	0.04	0.35	0.01	0.64	413
B	18	16	11	0.65	0.85	0.96	1.8	0.96	1	0.8	0.91	0	0.79	258
A	5	5	5	1	1	1	2	1	1	0.37	0.37	0	0.88	36
C	7	6	7	1	0.92	0.99	1.91	0.99	1	1.28	1.31	0	0.95	98
E	9	3	0	0	0.35	0.88	1.23	0.88	0.97	1	0.76	0.01	0.42	119
M	4	5	2	0.44	0.77	0.88	1.64	0.88	1	-0.59	-0.55	0.02	0.11	234
Helix 7	Base Pair (80:106)		BPC: cWW	AI: --	Strong
Frequency
Aln	GC	CG	UA	AU	GU	UG	AA	AC	AG	CA	CC	CU	GA	GG	UC	UU	gap	Seq
T	54.1*	0.4*	1.1*	3.9*	0.5	0.3	--	--	--	0.1	--	0.1	0.3	0.5	9.8	0.9	27.9	745
3	72.6*	--	0.7*	2.9*	0.5	--	--	--	--	0.2	--	0.2	0.5	1	17.7	1.7	2	413
B	99.6	--	--	--	0.4	--	--	--	--	--	--	--	--	--	--	--	--	258
A	91.7*	--	--	8.3*	--	--	--	--	--	--	--	--	--	--	--	--	--	36
C	95.9*	--	1.0*	2.0*	--	1	--	--	--	--	--	--	--	--	--	--	--	98
E	67.2*	3.4*	3.4*	11.8*	3.4	--	--	1.7	--	--	--	--	1.7	--	0.8	--	6.7	119
M	3.8*	1.3*	1.7*	6.4*	0.9	0.4	--	--	--	--	--	--	--	--	--	--	85.4	234
Collective Score
Aln	Xch	Ych	PE	PES	Cov1	Cov3	C1+C3	WC	WCGU	XCons	YCons	DfDel	PNuc	Seq
T	16	15	10	0.65	0.3	0.82	1.12	0.82	0.84	-0.15	0.12	0	0.51	745
3	5	7	2	0.33	0.14	0	0.14	0.78	0.78	0.88	1.35	0	0.64	413
B	0	1	0	0	0	0	0	1	1	2	1.96	0	0.79	258
A	1	1	1	1	1	1	2	1	1	1.59	1.59	0	0.88	36
C	2	1	1	0.67	0.75	0.99	1.74	0.99	1	1.71	1.7	0	0.95	98
E	4	5	1	0.22	0.71	0.92	1.63	0.92	0.95	0.53	0.49	0.01	0.42	119
M	9	7	7	0.88	0.84	0.91	1.75	0.91	1	-0.6	-0.56	0.02	0.11	234
Helix 7	Base Pair (81:105)		BPC: cWW	AI: --	Strong
Frequency
Aln	GC	CG	UA	AU	GU	UG	AA	AC	AG	CA	CC	CU	GA	GG	UC	UU	gap	Seq
T	48.7*	0.7*	1.9*	3.4*	0.4	0.4	0.1	0.9	--	--	--	--	0.1	--	--	0.1	43.3	744
3	65.0*	1.0*	1.2*	2.7*	0.5	0.2	--	0.7	--	--	--	--	0.2	--	--	--	28.4	412
B	90.3*	1.6*	1.9*	4.3*	0.4	0.4	--	1.2	--	--	--	--	--	--	--	--	--	257
A	100	--	--	--	--	--	--	--	--	--	--	--	--	--	--	--	--	36
C	85.7*	--	3.1*	7.1*	--	--	--	3.1	--	--	--	--	--	--	--	1	--	98
E	--	--	0.8*	--	0.8*	--	--	--	--	--	--	--	--	--	--	--	98.3	119
M	4.3*	0.4*	2.6*	3.0*	0.4	0.9	0.4	0.4	--	--	--	--	--	--	--	--	87.6	234
Collective Score
Aln	Xch	Ych	PE	PES	Cov1	Cov3	C1+C3	WC	WCGU	XCons	YCons	DfDel	PNuc	Seq
T	23	13	10	0.56	0.73	0.96	1.7	0.96	0.98	-0.06	-0.27	0.1	0.4	744
3	12	7	4	0.42	0.74	0.98	1.72	0.98	0.99	1.04	0.19	0.17	0.47	412
B	6	7	4	0.61	0.8	0.98	1.78	0.98	0.99	1.41	1.46	0	0.79	257
A	0	0	0	0	0	0	0	1	1	2	2	0	0.88	36
C	5	4	4	0.89	0.71	0.96	1.67	0.96	0.96	1.28	1.4	0	0.95	98
E	6	0	0	0	1	1	2	0.5	1	0.16	-0.17	0.37	0.01	119
M	6	2	2	0.5	0.74	0.83	1.56	0.83	0.93	-0.56	-0.57	0	0.09	234
Helix 7	Base Pair (82:104)		BPC: tSH	AI: --	Strong
Frequency
Aln	GC	CG	UA	AU	GU	UG	AA	AC	AG	CA	CC	CU	GA	GG	UC	UU	gap	Seq
T	--	0.1	4.3*	0.8	35.6*	1.2	0.1	0.1	0.1*	0.4	6.2*	--	3.6	0.8	2.6	0.3	43.7	745
3	--	0.2	5.1*	--	40.2*	1.9	--	0.2	--	0.7	10.7*	--	6.3	1.2	4.6	--	28.8	413
B	--	0.4	8.1*	--	60.9*	2.7	--	0.4	--	--	17.1*	--	2.3	1.9	5.8	--	0.4	258
A	--	--	--	--	25	--	--	--	--	8.3	--	--	55.6*	--	11.1*	--	--	36
C	--	--	2.0*	2	91.8*	--	--	--	--	--	2.0*	--	1	1	--	--	--	98
E	--	--	--	--	--	0.8	--	--	--	--	--	--	--	--	--	--	99.1	119
M	--	--	3.8*	1.7	3.8*	0.4	0.4	--	0.4*	--	--	--	--	--	--	0.9	88.4	234
Collective Score
Aln	Xch	Ych	PE	PES	Cov1	Cov3	C1+C3	WC	WCGU	XCons	YCons	DfDel	PNuc	Seq
T	24	27	9	0.35	0.51	0.82	1.33	0.09	0.75	-0.57	-0.66	0.08	0.4	745
3	16	21	5	0.27	0.51	0.79	1.29	0.07	0.67	-0.04	-0.57	0.12	0.47	413
B	7	16	3	0.26	0.65	0.86	1.51	0.09	0.72	0.66	0.52	0	0.79	258
A	4	5	2	0.44	0.25	0.67	0.92	0	0.25	1.1	0.73	0	0.88	36
C	4	4	3	0.75	0.5	0.96	1.46	0.04	0.96	1.57	1.58	0	0.95	98
E	5	0	0	0	0	0	0	0	1	-0.09	-0.05	0	0	119
M	4	2	1	0.33	0.56	0.7	1.26	0.48	0.85	-0.56	-0.45	0.01	0.09	234
Helix 7	Base Pair (85:97)		BPC: cWW	AI: --	Strong
Frequency
Aln	GC	CG	UA	AU	GU	UG	AA	AC	AG	CA	CC	CU	GA	GG	UC	UU	gap	Seq
T	49.5*	0.3*	1.1*	3.6*	1.1	--	0.1	0.1	0.1	--	--	--	0.3	--	--	0.3	43.6	746
3	68.3*	0.5*	0.5*	0.7*	1	--	--	--	--	--	--	--	0.2	--	--	--	28.8	413
B	96.5*	--	0.8*	1.2*	1.6	--	--	--	--	--	--	--	--	--	--	--	--	257
A	94.4*	5.6*	--	--	--	--	--	--	--	--	--	--	--	--	--	--	--	36
C	87.9*	--	--	5.1*	4	--	1	--	--	--	--	--	--	--	--	2	--	99
E	--	--	--	--	--	--	--	--	--	--	--	--	0.8	--	--	--	99.2	120
M	--	--	2.6*	8.1*	--	--	--	0.4	0.4	--	--	--	0.4	--	--	--	88.1	234
Collective Score
Aln	Xch	Ych	PE	PES	Cov1	Cov3	C1+C3	WC	WCGU	XCons	YCons	DfDel	PNuc	Seq
T	11	14	9	0.72	0.71	0.96	1.68	0.96	0.98	-0.21	-0.23	0.01	0.4	746
3	5	6	5	0.91	0.58	0.98	1.57	0.98	1	0.42	0.35	0	0.47	413
B	4	5	4	0.89	0.56	0.98	1.54	0.98	1	1.84	1.76	0	0.79	257
A	1	1	1	1	1	1	2	1	1	1.69	1.69	0	0.88	36
C	3	6	3	0.67	0.42	0.93	1.35	0.93	0.97	1.53	1.42	0	0.96	99
E	0	0	0	0	0	0	0	0	0	-0.05	-0.05	0	0	120
M	3	2	1	0.4	0.67	0.89	1.56	0.89	0.89	-0.5	-0.43	0.02	0.09	234
Helix 7	Base Pair (86:96)		BPC: cWW	AI: --	Strong
Frequency
Aln	GC	CG	UA	AU	GU	UG	AA	AC	AG	CA	CC	CU	GA	GG	UC	UU	gap	Seq
T	9.2*	36.3*	4.0*	2.7*	0.1	3.8	0.3	--	--	--	--	--	--	--	--	--	43.6	746
3	14.0*	47.5*	4.4*	2.7*	0.2	2.4	--	--	--	--	--	--	--	--	--	--	28.8	413
B	12.1*	72.8*	7.0*	3.9*	0.4	3.9	--	--	--	--	--	--	--	--	--	--	--	257
A	72.2*	25.0*	--	2.8*	--	--	--	--	--	--	--	--	--	--	--	--	--	36
C	--	72.7*	7.1*	2.0*	--	17.2	1	--	--	--	--	--	--	--	--	--	--	99
E	0.8	--	--	--	--	--	--	--	--	--	--	--	--	--	--	--	99.2	120
M	4.7*	1.3*	2.1*	3.0*	--	0.4	0.4	--	--	--	--	--	--	--	--	--	88.1	234
Collective Score
Aln	Xch	Ych	PE	PES	Cov1	Cov3	C1+C3	WC	WCGU	XCons	YCons	DfDel	PNuc	Seq
T	40	33	29	0.8	0.79	0.93	1.72	0.93	0.99	-0.68	-0.58	0.01	0.4	746
3	24	24	22	0.92	0.89	0.96	1.85	0.96	1	-0.41	-0.33	0	0.47	413
B	22	22	20	0.91	0.84	0.96	1.8	0.96	1	0.75	0.88	0	0.79	257
A	2	2	2	1	1	1	2	1	1	1.02	1.02	0	0.88	36
C	11	5	3	0.38	0.33	0.82	1.15	0.82	0.99	1.02	1.46	0	0.96	99
E	0	0	0	0	0	0	0	1	1	-0.05	-0.05	0	0	120
M	5	4	4	0.89	0.88	0.93	1.81	0.93	0.96	-0.59	-0.52	0.02	0.09	234
Helix 7	Base Pair (87:95)		BPC: cWW	AI: --	Strong
Frequency
Aln	GC	CG	UA	AU	GU	UG	AA	AC	AG	CA	CC	CU	GA	GG	UC	UU	gap	Seq
T	2.0*	10.1*	38.3*	2.9*	--	0.5	0.3	0.4	--	0.1	0.3	0.1	--	--	0.7	0.1	44.1	746
3	1.9*	17.4*	46.2*	2.4*	--	0.5	--	0.7	--	0.2	0.5	0.2	--	--	0.7	--	29	413
B	2.7*	16.3*	74.3*	2.7*	--	0.8	--	1.2	--	0.4	0.4	0.4	--	--	0.4	--	0.4	257
A	--	83.3*	--	8.3*	--	--	--	--	--	--	2.8	--	--	--	5.6*	--	--	36
C	2.0*	1.0*	90.9*	2.0*	--	1	--	--	--	--	--	--	--	--	2	1	--	99
E	0.8	--	--	--	--	--	--	--	--	--	--	--	--	--	--	--	99.2	120
M	2.1*	0.9*	2.1*	4.3*	--	0.4	0.9	--	--	--	--	--	--	--	--	--	89.3	234
Collective Score
Aln	Xch	Ych	PE	PES	Cov1	Cov3	C1+C3	WC	WCGU	XCons	YCons	DfDel	PNuc	Seq
T	28	31	23	0.78	0.85	0.95	1.81	0.95	0.96	-0.55	-0.6	0.01	0.4	746
3	18	22	16	0.8	0.88	0.96	1.84	0.96	0.97	-0.33	-0.37	0	0.47	413
B	16	19	14	0.8	0.86	0.96	1.83	0.96	0.97	0.89	0.89	0	0.79	257
A	2	3	2	0.8	0.83	0.97	1.81	0.92	0.92	1.28	1.18	0	0.88	36
C	3	5	3	0.75	0.56	0.96	1.51	0.96	0.97	1.64	1.42	0	0.96	99
E	0	0	0	0	0	0	0	1	1	-0.05	-0.05	0	0	120
M	7	4	4	0.73	0.8	0.88	1.68	0.88	0.92	-0.54	-0.48	0.02	0.08	234
Helix 8	Base Pair (121:130)		BPC: cWW	AI: --	Strong
Frequency
Aln	GC	CG	UA	AU	GU	UG	AA	AC	AG	CA	CC	CU	GA	GG	UC	UU	gap	Seq
T	51.1*	0.9*	0.1*	11.2*	5.4	--	0.7	0.8	0.1	--	--	0.1	--	--	--	--	29.4	753
3	85.7*	--	--	0.7*	7.9	--	0.2	1.4	0.2	--	--	--	--	--	--	--	3.8	420
B	94.7*	--	--	0.4*	3	--	--	0.8	--	--	--	--	--	--	--	--	1.2	264
A	38.9	--	--	5.6	52.8*	--	2.8*	--	--	--	--	--	--	--	--	--	--	36
C	16.2*	--	--	73.7*	8.1	--	2	--	--	--	--	--	--	--	--	--	--	99
E	80.0*	--	--	--	5	--	--	3.3	0.8*	--	--	--	--	--	--	--	10.8	120
M	3.8*	3.0*	0.4*	3.4*	--	--	0.9	--	--	--	--	0.4	--	--	--	--	88	234
Collective Score
Aln	Xch	Ych	PE	PES	Cov1	Cov3	C1+C3	WC	WCGU	XCons	YCons	DfDel	PNuc	Seq
T	18	22	14	0.7	0.63	0.9	1.53	0.9	0.98	-0.06	-0.16	0.01	0.51	753
3	4	8	3	0.5	0.07	0	0.07	0.9	0.98	1.56	1.21	0.01	0.64	420
B	2	3	1	0.4	0.09	0	0.09	0.96	0.99	1.87	1.66	0.01	0.8	264
A	1	3	1	0.5	0.06	0	0.06	0.44	0.97	1.59	0.87	0	0.88	36
C	9	8	6	0.71	0.61	0.9	1.51	0.9	0.98	1.2	1.22	0	0.96	99
E	1	2	1	0.67	0.09	0	0.09	0.9	0.95	1.06	0.92	0.02	0.41	120
M	5	6	5	0.91	0.84	0.89	1.74	0.89	0.89	-0.53	-0.53	0.01	0.09	234
Helix 8	Base Pair (122:129)		BPC: cWW	AI: --	Strong
Frequency
Aln	GC	CG	UA	AU	GU	UG	AA	AC	AG	CA	CC	CU	GA	GG	UC	UU	gap	Seq
T	52.8*	12.1*	1.3*	3.7*	0.3	0.4	--	--	--	--	0.1	--	--	--	0.1	--	29.2	754
3	69.4*	21.6*	2.1*	2.1*	0.2	0.7	--	--	--	--	0.2	--	--	--	--	--	3.5	421
B	97.4*	--	--	1.9*	0.4	--	--	--	--	--	--	--	--	--	--	--	0.4	265
A	91.7*	--	--	8.3*	--	--	--	--	--	--	--	--	--	--	--	--	--	36
C	86.9*	--	--	13.1*	--	--	--	--	--	--	--	--	--	--	--	--	--	99
E	0.8*	75.8*	7.5*	0.8*	--	2.5	--	--	--	--	0.8	--	--	--	--	--	11.6	120
M	8.5*	--	0.4*	2.6*	0.4	--	--	--	--	--	--	--	--	--	0.4	--	87.6	234
Collective Score
Aln	Xch	Ych	PE	PES	Cov1	Cov3	C1+C3	WC	WCGU	XCons	YCons	DfDel	PNuc	Seq
T	11	11	8	0.73	0.95	0.99	1.94	0.99	1	-0.24	-0.23	0	0.51	754
3	5	3	3	0.75	0.96	0.99	1.94	0.99	1	0.65	0.67	0	0.64	421
B	1	1	1	1	0.83	1	1.83	1	1	1.82	1.8	0	0.81	265
A	0	0	0	0	1	1	2	1	1	1.59	1.59	0	0.88	36
C	3	3	3	1	1	1	2	1	1	1.44	1.44	0	0.96	99
E	4	2	2	0.67	0.73	0.96	1.7	0.96	0.99	0.66	0.75	0	0.4	120
M	3	5	2	0.5	0.78	0.93	1.71	0.93	0.97	-0.46	-0.45	0.01	0.09	234
Helix 8	Base Pair (123:128)		BPC: cWW	AI: --	Strong
Frequency
Aln	GC	CG	UA	AU	GU	UG	AA	AC	AG	CA	CC	CU	GA	GG	UC	UU	gap	Seq
T	53.8*	0.3*	0.4*	1.7*	0.1	0.3	--	0.1	--	--	--	--	--	--	--	--	43.3	753
3	69.8*	0.2*	0.2*	1.4*	0.2	0.2	--	--	--	--	--	--	--	--	--	--	27.8	420
B	97.0*	--	--	2.3*	0.4	--	--	--	--	--	--	--	--	--	--	--	0.4	264
A	100	--	--	--	--	--	--	--	--	--	--	--	--	--	--	--	--	36
C	98.0*	--	--	2.0*	--	--	--	--	--	--	--	--	--	--	--	--	--	99
E	0.8*	0.8*	0.8*	--	--	0.8	--	--	--	--	--	--	--	--	--	--	96.6	120
M	6.4*	0.4*	0.9*	2.1*	--	0.4	--	0.4	--	--	--	--	--	--	--	--	89.3	234
Collective Score
Aln	Xch	Ych	PE	PES	Cov1	Cov3	C1+C3	WC	WCGU	XCons	YCons	DfDel	PNuc	Seq
T	8	9	8	0.94	0.82	0.99	1.81	0.99	1	-0.06	-0.06	0.01	0.41	753
3	2	2	2	1	0.8	0.99	1.79	0.99	1	0.41	0.39	0	0.48	420
B	2	2	2	1	0.86	1	1.85	1	1	1.8	1.75	0	0.81	264
A	0	0	0	0	0	0	0	1	1	2	2	0	0.88	36
C	1	1	1	1	1	1	2	1	1	1.86	1.86	0	0.96	99
E	0	0	0	0	0.67	0.75	1.42	0.75	1	-0.24	-0.19	0.01	0.01	120
M	5	6	5	0.91	0.8	0.92	1.72	0.92	0.96	-0.47	-0.43	0.01	0.08	234
Helix 9	Base Pair (131:148)		BPC: cWW	AI: --	Strong
Frequency
Aln	GC	CG	UA	AU	GU	UG	AA	AC	AG	CA	CC	CU	GA	GG	UC	UU	gap	Seq
T	23.5*	0.8*	0.5*	25.1*	1.6	--	--	--	0.1	--	--	--	--	--	--	--	48.3	758
3	41.7*	1.4*	0.5*	44.6*	2.6	--	--	--	--	--	--	--	--	--	--	--	9.2	424
B	33.0*	1.1*	0.7*	62.9*	0.4	--	--	--	--	--	--	--	--	--	--	--	1.9	267
A	65.7*	--	--	8.6*	--	--	--	--	--	--	--	--	--	--	--	--	25.7	35
C	--	--	1	--	--	--	--	--	--	--	--	--	--	--	--	--	99	100
E	54.1*	2.5*	--	14.8*	8.2	--	--	--	--	--	--	--	--	--	--	--	20.4	122
M	0.4*	--	0.4*	0.4*	0.4	--	--	--	0.4	--	--	--	--	--	--	--	97.9	234
Collective Score
Aln	Xch	Ych	PE	PES	Cov1	Cov3	C1+C3	WC	WCGU	XCons	YCons	DfDel	PNuc	Seq
T	19	20	17	0.87	0.94	0.97	1.9	0.97	1	-0.56	-0.56	0.01	0.37	758
3	18	19	16	0.86	0.94	0.97	1.92	0.97	1	0.35	0.46	0.02	0.61	424
B	12	12	11	0.92	0.99	1	1.99	1	1	0.81	0.79	0	0.8	267
A	1	1	1	1	1	1	2	1	1	0.22	0.28	0.02	0.63	35
C	0	0	0	0	0	0	0	1	1	-0.12	-0.2	0.02	0.01	100
E	5	6	4	0.73	0.68	0.9	1.57	0.9	1	0.17	0.28	0.04	0.37	122
M	1	1	1	1	0.5	0.6	1.1	0.6	0.8	-0.19	-0.15	0.01	0.02	234
Helix 9	Base Pair (132:147)		BPC: cWW	AI: --	Strong
Frequency
Aln	GC	CG	UA	AU	GU	UG	AA	AC	AG	CA	CC	CU	GA	GG	UC	UU	gap	Seq
T	11.6*	23.7*	1.1*	6.7*	8	0.3	--	--	--	--	--	--	0.1	--	--	0.1	48.4	758
3	20.5*	42.2*	1.4*	11.6*	14.4	0.5	--	--	--	--	--	--	0.2	--	--	--	9.2	424
B	25.5*	33.7*	0.7*	17.2*	21	--	--	--	--	--	--	--	0.4	--	--	--	1.5	267
A	2.8	58.3*	5.6*	2.8	5.6*	--	--	--	--	--	--	--	--	--	--	--	25	36
C	--	--	--	1	--	--	--	--	--	--	--	--	--	--	--	--	99	100
E	14.9*	56.2*	1.7*	1.7*	2.5	1.7	--	--	--	--	--	--	--	--	--	--	21.5	121
M	0.4*	0.4*	0.9*	0.4*	--	--	--	--	--	--	--	--	--	--	--	0.4	97.4	234
Collective Score
Aln	Xch	Ych	PE	PES	Cov1	Cov3	C1+C3	WC	WCGU	XCons	YCons	DfDel	PNuc	Seq
T	28	28	21	0.75	0.69	0.83	1.53	0.83	0.99	-0.78	-0.79	0.01	0.38	758
3	27	27	20	0.74	0.69	0.83	1.52	0.83	1	0	0.04	0.02	0.61	424
B	21	22	15	0.7	0.67	0.78	1.45	0.78	1	0.35	0.25	0	0.81	267
A	2	1	1	0.67	0.67	0.93	1.59	0.93	1	-0.13	-0.13	0	0.66	36
C	0	0	0	0	0	0	0	1	1	-0.12	-0.13	0.01	0.01	100
E	4	4	4	1	0.81	0.95	1.76	0.95	1	-0.02	0.33	0.04	0.36	121
M	1	1	1	1	0.75	0.83	1.58	0.83	0.83	-0.21	-0.17	0.01	0.02	234
Helix 9	Base Pair (133:146)		BPC: cWW	AI: --	Strong
Frequency
Aln	GC	CG	UA	AU	GU	UG	AA	AC	AG	CA	CC	CU	GA	GG	UC	UU	gap	Seq
T	0.7*	26.5*	19.0*	2.9*	--	0.5	--	--	2.1	0.1	0.1	--	0.3	0.4	--	0.1	47.4	759
3	0.9*	47.1*	33.4*	5.2*	--	0.9	--	--	3.8	--	--	--	0.5	0.7	--	0.2	7.3	425
B	0.4*	50.9*	41.6*	2.6*	--	1.1	--	--	0.4	--	--	--	0.4	1.1	--	--	1.5	267
A	5.6*	52.8*	13.9*	--	--	--	--	--	--	--	--	--	--	--	--	--	27.8	36
C	--	--	--	--	--	--	--	--	--	--	--	--	--	--	--	--	100	100
E	0.8*	36.9*	21.3*	12.3*	--	0.8	--	--	12.3	--	--	--	0.8	--	--	0.8	13.9	122
M	0.4*	0.4*	0.9*	--	--	--	--	--	--	0.4	0.4	--	--	--	--	--	97.4	234
Collective Score
Aln	Xch	Ych	PE	PES	Cov1	Cov3	C1+C3	WC	WCGU	XCons	YCons	DfDel	PNuc	Seq
T	31	30	28	0.92	0.86	0.93	1.79	0.93	0.94	-0.73	-0.64	0	0.38	759
3	30	29	27	0.92	0.87	0.93	1.8	0.93	0.94	0.11	0.27	0	0.62	425
B	19	17	15	0.83	0.94	0.97	1.91	0.97	0.98	0.6	0.7	0	0.81	267
A	0	1	1	1	1	1	2	1	1	-0.18	-0.18	0	0.63	36
C	0	0	0	0	0	0	0	0	0	-0.06	0	0.01	0	100
E	11	11	11	1	0.7	0.83	1.53	0.83	0.84	-0.26	-0.1	0	0.4	122
M	1	1	1	1	0.25	0.5	0.75	0.67	0.67	-0.21	-0.16	0.01	0.02	234
Helix 9	Base Pair (134:145)		BPC: cWW	AI: --	Strong
Frequency
Aln	GC	CG	UA	AU	GU	UG	AA	AC	AG	CA	CC	CU	GA	GG	UC	UU	gap	Seq
T	7.4*	13.3*	8.2*	18.0*	0.1	1.8	--	0.1	0.1	--	0.7	1.7	--	--	0.1	--	48.4	760
3	13.1*	23.2*	14.1*	32.2*	0.2	3.1	--	0.2	0.2	--	1.2	3.1	--	--	--	--	9.5	426
B	14.6*	12.3*	18.7*	50.0*	--	0.4	--	0.4	0.4	--	0.4	--	--	--	--	--	3	268
A	36.1*	25.0*	--	2.8*	--	--	--	--	--	--	--	5.6	--	--	--	--	30.6	36
C	--	--	1	--	--	--	--	--	--	--	--	--	--	--	--	--	99	100
E	3.3*	46.7*	8.2*	1.6*	0.8	9.8	--	--	--	--	3.3	9	--	--	--	--	17.1	122
M	--	0.9*	0.4*	--	--	0.4	--	--	--	--	--	--	--	--	0.4	--	97.8	234
Collective Score
Aln	Xch	Ych	PE	PES	Cov1	Cov3	C1+C3	WC	WCGU	XCons	YCons	DfDel	PNuc	Seq
T	36	37	35	0.96	0.86	0.91	1.77	0.91	0.95	-0.95	-0.94	0.01	0.38	760
3	35	36	34	0.96	0.86	0.91	1.77	0.91	0.95	-0.32	-0.33	0.01	0.61	426
B	25	24	23	0.94	0.97	0.98	1.95	0.98	0.99	0.07	0.1	0.01	0.8	268
A	3	4	5	1	0.83	0.92	1.75	0.92	0.92	-0.33	-0.46	0	0.61	36
C	0	0	0	0	0	0	0	1	1	-0.06	-0.06	0	0.01	100
E	7	8	6	0.8	0.36	0.72	1.09	0.72	0.85	0.1	-0.16	0.02	0.38	122
M	1	1	1	1	0.33	0.6	0.93	0.6	0.8	-0.21	-0.14	0.01	0.02	234
Helix 9	Base Pair (135:144)		BPC: cWW	AI: --	Strong
Frequency
Aln	GC	CG	UA	AU	GU	UG	AA	AC	AG	CA	CC	CU	GA	GG	UC	UU	gap	Seq
T	15.2*	17.0*	9.4*	4.0*	0.5	1.1	0.4	0.3	--	0.9	--	0.7	0.7	--	--	0.3	49.9	759
3	27.1*	30.1*	16.5*	7.1*	0.9	1.9	0.2	0.2	--	1.6	--	1.2	1.2	--	--	0.5	11.4	425
B	35.4*	25.4*	22.4*	9.3*	1.5	1.1	--	0.4	--	--	--	--	--	--	--	--	4.5	268
A	20.0*	40.0*	2.9*	2.9*	--	--	--	--	--	--	--	--	--	--	--	--	34.3	35
C	--	--	--	--	--	--	1	--	--	--	--	--	--	--	--	--	99	100
E	10.7*	37.7*	7.4*	3.3*	--	4.1	0.8	--	--	5.7	--	4.1	4.1	--	--	1.6	20.5	122
M	--	0.4*	0.4*	--	--	--	0.4	0.4*	--	--	--	--	--	--	--	--	98.2	234
Collective Score
Aln	Xch	Ych	PE	PES	Cov1	Cov3	C1+C3	WC	WCGU	XCons	YCons	DfDel	PNuc	Seq
T	30	39	28	0.81	0.86	0.91	1.76	0.91	0.94	-0.93	-0.94	0.01	0.36	759
3	29	38	27	0.81	0.87	0.91	1.78	0.91	0.94	-0.32	-0.39	0.01	0.6	425
B	18	25	19	0.88	0.95	0.97	1.92	0.97	1	-0.13	-0.09	0.01	0.79	268
A	2	2	2	1	1	1	2	1	1	-0.5	-0.53	0.02	0.56	35
C	0	0	0	0	0	0	0	0	0	-0.06	-0.06	0	0.01	100
E	9	11	6	0.6	0.51	0.74	1.25	0.74	0.79	-0.26	-0.51	0.02	0.37	122
M	1	1	1	1	0.33	0.5	0.83	0.5	0.5	-0.19	-0.12	0.01	0.01	234
Helix 9	Base Pair (136:143)		BPC: cWW	AI: --	Strong
Frequency
Aln	GC	CG	UA	AU	GU	UG	AA	AC	AG	CA	CC	CU	GA	GG	UC	UU	gap	Seq
T	12.9*	5.9*	6.6*	11.3*	0.7	1.6	1.7	0.3	1.3	--	--	0.1	--	0.1	--	0.1	57.4	760
3	22.8*	10.6*	11.7*	20.2*	0.7	2.8	3.1	0.5	2.3	--	--	0.2	--	0.2	--	0.2	24.7	426
B	28.0*	8.2*	9.7*	29.5*	0.7	2.6	3.4	--	--	--	--	--	--	--	--	--	17.9	268
A	16.7*	5.6*	--	2.8*	2.8	2.8	--	--	--	--	--	--	--	--	--	--	69.4	36
C	--	--	--	--	1	--	--	--	--	--	--	--	--	--	--	--	99	100
E	13.1*	17.2*	19.7*	4.9*	--	3.3	3.3	1.6	8.2	--	--	0.8	--	0.8	--	0.8	26.2	122
M	0.4	--	--	--	0.4	--	--	--	--	--	--	--	--	--	--	--	99.1	234
Collective Score
Aln	Xch	Ych	PE	PES	Cov1	Cov3	C1+C3	WC	WCGU	XCons	YCons	DfDel	PNuc	Seq
T	21	19	16	0.8	0.8	0.86	1.66	0.86	0.91	-0.95	-0.97	0.01	0.31	760
3	21	19	16	0.8	0.81	0.87	1.67	0.87	0.91	-0.71	-0.78	0.01	0.51	426
B	12	11	11	0.96	0.87	0.92	1.79	0.92	0.96	-0.51	-0.57	0	0.68	268
A	0	0	0	0	0.6	0.82	1.42	0.82	1	-0.73	-0.71	0	0.27	36
C	0	0	0	0	0	0	0	0	1	-0.06	-0.06	0	0.01	100
E	9	8	5	0.59	0.65	0.74	1.4	0.74	0.79	-0.7	-0.67	0.02	0.34	122
M	0	0	0	0	0	0	0	0.5	1	-0.1	-0.06	0.01	0.01	234
Helix 9	Base Pair (137:142)		BPC: cWW	AI: --	Strong
Frequency
Aln	GC	CG	UA	AU	GU	UG	AA	AC	AG	CA	CC	CU	GA	GG	UC	UU	gap	Seq
T	7.2*	8.7*	8.3*	5.1*	0.7	5.1	0.4	0.8	0.3	--	--	--	0.5	2.1	--	0.5	60.3	760
3	12.9*	15.5*	14.8*	9.2*	1.2	9.2	0.7	1.4	0.5	--	--	--	0.9	3.8	--	0.5	29.4	426
B	6.0*	22.4*	19.8*	13.8*	0.7	8.2	--	--	--	--	--	--	--	6	--	--	23.2	268
A	19.4*	8.3*	--	--	--	--	--	--	--	--	--	--	--	--	--	--	72.2	36
C	--	--	--	--	--	--	--	--	--	--	--	--	--	--	--	1	99	100
E	26.2*	2.5	8.2	1.6	2.5	13.9*	2.5*	4.9	1.6	--	--	--	3.3	--	--	1.6	31.1	122
M	--	--	--	--	--	--	--	--	--	--	--	--	--	--	--	0.4	99.6	234
Collective Score
Aln	Xch	Ych	PE	PES	Cov1	Cov3	C1+C3	WC	WCGU	XCons	YCons	DfDel	PNuc	Seq
T	22	25	18	0.77	0.67	0.74	1.4	0.74	0.88	-0.96	-0.93	0.01	0.29	760
3	22	25	18	0.77	0.67	0.74	1.41	0.74	0.89	-0.8	-0.8	0.02	0.48	426
B	15	15	11	0.73	0.73	0.81	1.53	0.81	0.92	-0.72	-0.58	0	0.63	268
A	0	0	0	0	1	1	2	1	1	-0.54	-0.54	0	0.24	36
C	0	0	0	0	0	0	0	0	0	-0.06	-0.06	0	0.01	100
E	7	10	7	0.82	0.39	0.62	1	0.56	0.8	-0.58	-0.73	0.04	0.32	122
M	0	0	0	0	0	0	0	0	0	-0.07	-0.06	0	0	234
Helix 10	Base Pair (150:176)		BPC: cWW	AI: --	Strong
Frequency
Aln	GC	CG	UA	AU	GU	UG	AA	AC	AG	CA	CC	CU	GA	GG	UC	UU	gap	Seq
T	0.4*	30.0*	35.3*	2.2*	--	0.4	0.1	--	--	0.3	--	--	0.1	0.1	--	--	31	759
3	--	32.2*	61.0*	2.1*	--	0.7	0.2	--	--	0.2	--	--	0.2	--	--	--	3.3	426
B	--	21.9*	75.6*	0.4*	--	1.1	0.4	--	--	--	--	--	0.4	--	--	--	0.4	270
A	--	72.2*	5.6*	22.2*	--	--	--	--	--	--	--	--	--	--	--	--	--	36
C	2.0*	90.9*	1.0*	5.1*	--	--	--	--	--	1	--	--	--	--	--	--	--	99
E	--	43.3*	45.0*	--	--	--	--	--	--	0.8	--	--	--	--	--	--	10.9	120
M	0.4*	0.4*	3.0*	1.3*	--	--	--	--	--	--	--	--	--	0.4	--	--	94.4	234
Collective Score
Aln	Xch	Ych	PE	PES	Cov1	Cov3	C1+C3	WC	WCGU	XCons	YCons	DfDel	PNuc	Seq
T	25	30	23	0.84	0.97	0.98	1.95	0.98	0.99	-0.37	-0.34	0	0.5	759
3	21	24	19	0.84	0.96	0.98	1.95	0.98	0.99	0.67	0.64	0	0.65	426
B	13	14	11	0.81	0.92	0.98	1.9	0.98	0.99	1.11	1.15	0	0.82	270
A	3	3	3	1	1	1	2	1	1	0.95	0.95	0	0.88	36
C	4	5	4	0.89	0.89	0.99	1.88	0.99	0.99	1.49	1.43	0	0.96	99
E	5	7	5	0.83	0.98	0.99	1.97	0.99	0.99	0.4	0.32	0	0.41	120
M	0	1	0	0	0.83	0.92	1.76	0.92	0.92	-0.29	-0.3	0	0.04	234
Helix 10	Base Pair (151:175)		BPC: cWW	AI: --	Strong
Frequency
Aln	GC	CG	UA	AU	GU	UG	AA	AC	AG	CA	CC	CU	GA	GG	UC	UU	gap	Seq
T	8.8*	25.2*	26.7*	3.4*	3.3	0.7	--	--	--	0.1	--	0.1	0.3	--	--	0.5	30.8	759
3	15.7*	43.4*	25.6*	3.5*	5.9	1.2	--	--	--	0.2	--	0.2	--	--	--	0.9	3.3	426
B	4.4*	64.1*	27.8*	1.1*	--	1.9	--	--	--	0.4	--	--	--	--	--	--	0.4	270
A	--	16.7*	75.0*	8.3*	--	--	--	--	--	--	--	--	--	--	--	--	--	36
C	--	1.0*	93.9*	4.0*	--	--	--	--	--	--	--	--	1	--	--	--	--	99
E	45.8*	5.0*	5.8*	7.5*	20.8	--	--	--	--	--	--	0.8	--	--	--	3.3	10.8	120
M	--	2.1*	0.4*	3.0*	--	--	--	--	--	--	--	--	0.4	--	--	--	94	234
Collective Score
Aln	Xch	Ych	PE	PES	Cov1	Cov3	C1+C3	WC	WCGU	XCons	YCons	DfDel	PNuc	Seq
T	34	35	29	0.84	0.88	0.93	1.81	0.93	0.98	-0.69	-0.76	0	0.5	759
3	29	31	25	0.83	0.84	0.91	1.75	0.91	0.98	0.09	-0.03	0	0.65	426
B	21	19	18	0.9	0.94	0.98	1.92	0.98	1	0.76	0.82	0	0.82	270
A	4	4	4	1	1	1	2	1	1	0.96	0.96	0	0.88	36
C	4	3	3	0.86	0.83	0.99	1.82	0.99	0.99	1.59	1.68	0	0.96	99
E	4	8	3	0.5	0.42	0.72	1.14	0.72	0.95	0.18	0.09	0	0.41	120
M	1	1	1	1	0.86	0.93	1.79	0.93	0.93	-0.3	-0.29	0	0.04	234
Helix 10	Base Pair (152:174)		BPC: cWW	AI: --	Strong
Frequency
Aln	GC	CG	UA	AU	GU	UG	AA	AC	AG	CA	CC	CU	GA	GG	UC	UU	gap	Seq
T	6.6*	26.4*	9.7*	13.3*	2.5	3.6	1.7	0.3	--	1.8	0.1	0.3	0.4	0.3	--	1.4	31.6	759
3	8.7*	43.0*	9.6*	17.4*	4	6.1	0.5	--	--	3.1	--	0.2	0.2	0.5	--	2.6	4.2	426
B	12.6*	37.0*	10.4*	27.0*	6.3	0.4	0.7	--	--	--	--	0.4	0.4	0.4	--	3	1.5	270
A	--	80.6*	19.4*	--	--	--	--	--	--	--	--	--	--	--	--	--	--	36
C	12.1*	11.1*	33.3*	22.2*	1	1	11.1	2	--	1	1	1	2	--	--	--	1	99
E	2.5*	45.0*	5.0*	0.8*	--	20.8	--	--	--	10.8	--	--	--	0.8	--	2.5	11.7	120
M	0.4*	2.6*	--	2.1*	0.4	--	--	--	--	--	--	--	--	--	--	--	94.4	234
Collective Score
Aln	Xch	Ych	PE	PES	Cov1	Cov3	C1+C3	WC	WCGU	XCons	YCons	DfDel	PNuc	Seq
T	54	55	33	0.61	0.7	0.82	1.52	0.82	0.91	-0.82	-0.72	0	0.5	759
3	37	40	26	0.68	0.68	0.82	1.5	0.82	0.93	-0.06	0.14	0	0.65	426
B	28	29	22	0.77	0.81	0.88	1.7	0.88	0.95	0.01	0.11	0	0.82	270
A	1	1	1	1	1	1	2	1	1	1.29	1.29	0	0.88	36
C	17	15	7	0.44	0.69	0.8	1.49	0.8	0.82	0.12	0.13	0.01	0.95	99
E	8	10	3	0.33	0.19	0	0.19	0.6	0.84	0.18	0.52	0.01	0.4	120
M	0	0	0	0	0.86	0.92	1.78	0.92	1	-0.28	-0.27	0	0.04	234
Helix 10	Base Pair (153:173)		BPC: cWW	AI: --	Strong
Frequency
Aln	GC	CG	UA	AU	GU	UG	AA	AC	AG	CA	CC	CU	GA	GG	UC	UU	gap	Seq
T	3.2*	29.4*	17.3*	10.9*	2	0.3	0.4	0.1	--	0.3	0.4	0.1	--	0.1	0.1	0.9	34.4	759
3	5.4*	35.7*	27.9*	17.1*	3.5	0.5	0.5	--	--	0.2	0.5	0.2	--	--	--	1.4	6.9	426
B	4.4*	15.9*	39.6*	24.8*	5.2	0.7	0.7	--	--	--	--	0.4	--	--	--	1.9	6.3	270
A	22.2*	75.0*	--	--	--	--	--	--	--	--	2.8	--	--	--	--	--	--	36
C	--	71.7*	10.1*	2.0*	--	--	1	1	--	1	1	--	--	1	1	1	9.1	99
E	2.5*	68.3*	10.0*	5.0*	0.8	--	--	--	--	0.8	0.8	--	--	--	--	0.8	10.8	120
M	0.4*	--	0.9*	3.4*	--	--	--	--	--	--	--	--	--	--	--	--	95.3	234
Collective Score
Aln	Xch	Ych	PE	PES	Cov1	Cov3	C1+C3	WC	WCGU	XCons	YCons	DfDel	PNuc	Seq
T	40	46	36	0.84	0.87	0.93	1.8	0.93	0.96	-0.77	-0.69	0.01	0.48	759
3	31	34	27	0.83	0.88	0.93	1.81	0.93	0.97	-0.2	-0.12	0	0.63	426
B	23	22	19	0.84	0.84	0.91	1.74	0.91	0.97	-0.14	-0.06	0	0.78	270
A	1	2	1	0.67	0.89	0.97	1.86	0.97	0.97	1.24	1.19	0	0.88	36
C	9	12	9	0.86	0.63	0.92	1.55	0.92	0.92	0.56	1.02	0.09	0.87	99
E	7	10	7	0.82	0.84	0.96	1.8	0.96	0.97	0.37	0.44	0	0.41	120
M	0	0	0	0	1	1	2	1	1	-0.23	-0.23	0	0.04	234
Helix 10	Base Pair (154:172)		BPC: cWW	AI: --	Strong
Frequency
Aln	GC	CG	UA	AU	GU	UG	AA	AC	AG	CA	CC	CU	GA	GG	UC	UU	gap	Seq
T	2.5*	18.7*	26.7*	13.0*	0.8	1.7	--	--	--	--	0.1	0.3	--	0.1	0.3	1.1	34.7	759
3	4.5*	18.5*	41.1*	20.7*	1.4	2.8	--	--	--	--	--	0.5	--	0.2	0.5	0.9	8.9	426
B	3.7*	15.2*	35.2*	29.3*	1.9	4.4	--	--	--	--	--	0.7	--	--	0.4	1.1	8.2	270
A	16.7*	72.2*	--	--	--	--	--	--	--	--	--	--	--	2.8	--	--	8.3	36
C	--	62.6*	28.3*	4.0*	--	1	--	--	--	--	--	--	--	--	--	4	--	99
E	2.5*	10.0*	66.7*	7.5*	0.8	--	--	--	--	--	--	--	--	--	0.8	0.8	10.9	120
M	--	0.4*	--	3.0*	--	--	--	--	--	--	0.4	--	--	--	--	--	96.2	234
Collective Score
Aln	Xch	Ych	PE	PES	Cov1	Cov3	C1+C3	WC	WCGU	XCons	YCons	DfDel	PNuc	Seq
T	44	44	36	0.82	0.89	0.93	1.82	0.93	0.97	-0.75	-0.72	0	0.47	759
3	32	32	26	0.81	0.87	0.93	1.8	0.93	0.98	-0.17	-0.12	0	0.62	426
B	23	21	18	0.82	0.85	0.91	1.76	0.91	0.98	-0.14	-0.17	0	0.76	270
A	3	3	3	1	0.86	0.97	1.83	0.97	0.97	0.74	0.79	0	0.81	36
C	12	12	10	0.83	0.86	0.95	1.81	0.95	0.96	0.86	0.78	0	0.96	99
E	6	8	5	0.71	0.89	0.97	1.86	0.97	0.98	0.26	0.46	0	0.41	120
M	0	0	0	0	0.5	0.89	1.39	0.89	0.89	-0.19	-0.2	0	0.03	234
Helix 10	Base Pair (155:171)		BPC: cWW	AI: --	Strong
Frequency
Aln	GC	CG	UA	AU	GU	UG	AA	AC	AG	CA	CC	CU	GA	GG	UC	UU	gap	Seq
T	14.9*	8.0*	18.7*	16.6*	1.8	1.6	--	0.1	0.1	--	0.1	--	0.4	--	0.3	0.3	37	759
3	26.3*	12.0*	16.0*	26.3*	1.9	2.8	--	0.2	0.2	--	0.2	--	0.5	--	0.2	0.5	12.8	426
B	10.7*	14.4*	23.0*	39.3*	0.7	3.3	--	--	--	--	--	--	--	--	--	0.4	8.2	270
A	11.1*	11.1*	2.8*	--	8.3	2.8	--	--	--	--	--	--	5.6	--	--	--	58.3	36
C	--	10.1*	74.7*	11.1*	2	--	--	--	--	--	--	--	1	--	--	--	1	99
E	65.8*	6.7*	4.2*	5.0*	2.5	1.7	--	0.8	0.8	--	0.8	--	--	--	0.8	0.8	10	120
M	0.4	--	--	1.3	1.7*	--	--	--	--	--	--	--	--	--	0.4*	--	96.2	234
Collective Score
Aln	Xch	Ych	PE	PES	Cov1	Cov3	C1+C3	WC	WCGU	XCons	YCons	DfDel	PNuc	Seq
T	49	51	38	0.76	0.89	0.93	1.82	0.93	0.98	-0.9	-0.9	0	0.46	759
3	38	39	28	0.73	0.89	0.93	1.82	0.93	0.98	-0.48	-0.44	0	0.59	426
B	30	30	23	0.77	0.92	0.95	1.87	0.95	1	-0.24	-0.25	0	0.76	270
A	1	2	1	0.67	0.46	0.6	1.05	0.6	0.87	-0.7	-0.97	0	0.37	36
C	11	11	10	0.91	0.88	0.97	1.84	0.97	0.99	0.83	0.9	0.01	0.95	99
E	7	7	4	0.57	0.66	0.91	1.56	0.91	0.95	0.26	0.42	0.01	0.41	120
M	0	1	0	0	0.2	0	0.2	0.44	0.89	-0.21	-0.19	0	0.03	234
Helix 10	Base Pair (156:170)		BPC: cWW	AI: --	Strong
Frequency
Aln	GC	CG	UA	AU	GU	UG	AA	AC	AG	CA	CC	CU	GA	GG	UC	UU	gap	Seq
T	12.5*	7.4*	15.4*	18.7*	1.6	3.2	0.3	--	0.7	0.1	0.7	0.1	0.7	0.1	0.1	0.4	38	759
3	17.1*	12.0*	24.9*	19.7*	2.8	5.4	0.2	--	1.2	0.2	--	0.2	0.9	--	0.2	0.5	14.5	426
B	22.6*	13.3*	16.3*	27.0*	4.1	7.4	0.4	--	0.4	--	--	--	--	--	--	0.4	8.2	270
A	2.8	--	--	2.8	--	--	--	--	8.3*	--	--	--	8.3*	--	--	--	77.7	36
C	22.2*	5.1*	10.1*	57.6*	--	1	1	--	--	--	--	--	--	1	--	--	2	99
E	9.2*	12.5*	51.7*	8.3*	0.8	2.5	--	--	0.8	0.8	--	0.8	0.8	--	0.8	0.8	10	120
M	--	--	0.4*	0.4*	--	--	--	--	--	--	2.1*	--	0.4	--	--	0.4	96.2	234
Collective Score
Aln	Xch	Ych	PE	PES	Cov1	Cov3	C1+C3	WC	WCGU	XCons	YCons	DfDel	PNuc	Seq
T	47	53	34	0.68	0.82	0.87	1.69	0.87	0.95	-0.91	-0.92	0	0.45	759
3	36	40	24	0.63	0.81	0.86	1.67	0.86	0.96	-0.52	-0.53	0	0.58	426
B	26	26	18	0.69	0.81	0.86	1.67	0.86	0.99	-0.36	-0.36	0	0.76	270
A	1	2	0	0	0.6	0.75	1.35	0.25	0.25	-0.76	-0.72	0.07	0.2	36
C	11	13	10	0.83	0.93	0.97	1.89	0.97	0.98	0.41	0.28	0.01	0.94	99
E	9	12	6	0.57	0.78	0.91	1.69	0.91	0.94	-0.09	-0.05	0	0.41	120
M	0	0	0	0	0.5	0.78	1.28	0.22	0.22	-0.22	-0.21	0	0.03	234
Helix 10	Base Pair (157:169)		BPC: cWW	AI: --	Strong
Frequency
Aln	GC	CG	UA	AU	GU	UG	AA	AC	AG	CA	CC	CU	GA	GG	UC	UU	gap	Seq
T	6.2*	30.3*	11.7*	2.0*	0.5	5	0.7	--	0.3	0.1	0.4	--	--	0.3	--	2.8	39.7	759
3	10.6*	46.5*	13.6*	3.3*	0.5	7.3	0.5	--	0.5	0.2	0.5	--	--	--	--	--	16.6	426
B	15.6*	61.9*	3.7*	3.0*	0.4	7.4	--	--	--	--	0.4	--	--	--	--	--	7.8	270
A	--	--	8.3	--	--	--	5.6	--	--	2.8	--	--	--	--	--	--	83.4	36
C	2.0*	32.3*	31.3*	1.0*	1	7.1	3	--	--	--	1	--	--	1	--	17.2	3	99
E	2.5*	25.8*	37.5*	5.0*	0.8	9.2	--	--	1.7	--	0.8	--	--	--	--	--	16.6	120
M	--	--	--	--	0.4	--	--	--	--	--	--	--	--	0.4*	--	1.7*	97.4	234
Collective Score
Aln	Xch	Ych	PE	PES	Cov1	Cov3	C1+C3	WC	WCGU	XCons	YCons	DfDel	PNuc	Seq
T	37	36	25	0.69	0.67	0.83	1.5	0.83	0.93	-0.72	-0.67	0	0.44	759
3	23	25	17	0.71	0.74	0.89	1.63	0.89	0.98	-0.28	-0.1	0.01	0.56	426
B	17	15	12	0.75	0.73	0.91	1.64	0.91	1	0.21	0.43	0	0.76	270
A	1	1	0	0	0	0	0	0.5	0.5	-0.68	-0.44	0	0.15	36
C	13	10	7	0.61	0.53	0.69	1.22	0.69	0.77	0.52	0.12	0.02	0.93	99
E	5	9	5	0.71	0.73	0.85	1.58	0.85	0.97	-0.2	0.07	0.02	0.38	120
M	1	1	1	1	0.5	0.83	1.33	0	0.17	-0.16	-0.14	0	0.02	234
Helix 10	Base Pair (158:168)		BPC: cWW	AI: --	Weak
Frequency
Aln	GC	CG	UA	AU	GU	UG	AA	AC	AG	CA	CC	CU	GA	GG	UC	UU	gap	Seq
T	0.9*	1.2	13.2	0.8	--	36.6*	1.2*	0.3	2.1	0.9	0.5	--	0.4	0.1	0.3	0.3	41.1	759
3	1.2*	2.1	20.9	0.2*	--	55.6*	0.5	--	0.5	0.5*	--	--	0.7	0.2	--	0.2	17.4	426
B	--	2.2	0.4	--	--	87.0*	--	--	--	0.4*	--	--	--	0.4	--	--	9.7	270
A	--	--	--	--	--	2.8	--	--	5.6*	2.8*	--	--	--	--	--	--	88.9	36
C	1.0*	--	11.1	4	--	41.4*	7.1*	2	14.1	5.1	--	--	--	--	2	1	11.1	99
E	4.2*	2.5*	73.3*	0.8*	--	0.8	1.7	--	--	--	--	--	2.5	--	--	0.8	13.3	120
M	0.4	--	--	0.4*	--	--	--	--	--	--	1.7*	--	--	--	--	--	97.4	234
Collective Score
Aln	Xch	Ych	PE	PES	Cov1	Cov3	C1+C3	WC	WCGU	XCons	YCons	DfDel	PNuc	Seq
T	18	23	8	0.39	0.1	0	0.1	0.27	0.9	-0.27	-0.52	0.01	0.43	759
3	11	10	5	0.48	0.06	0	0.06	0.29	0.97	0.62	0.08	0	0.56	426
B	5	3	1	0.25	0.11	0	0.11	0.03	0.99	1.15	1.28	0	0.75	270
A	1	1	1	1	0.5	0.75	1.25	0	0.25	-0.59	-0.37	0.07	0.1	36
C	6	13	3	0.32	0.17	0	0.17	0.18	0.65	0.17	0.32	0.07	0.85	99
E	5	6	3	0.55	0.56	0.93	1.5	0.93	0.94	0.53	0.68	0	0.4	120
M	1	0	0	0	0.5	0.83	1.33	0.33	0.33	-0.15	-0.17	0	0.02	234
Helix 11	Base Pair (183:214)		BPC: cWW	AI: --	Strong
Frequency
Aln	GC	CG	UA	AU	GU	UG	AA	AC	AG	CA	CC	CU	GA	GG	UC	UU	gap	Seq
T	--	71.8*	1.6*	0.1*	--	0.1	--	--	0.1	--	--	--	0.1	0.1	--	0.2	25.7	834
3	--	97.5*	1.9*	--	--	--	--	--	0.2	--	--	--	0.2	0.2	--	--	--	484
B	--	99.3*	--	--	--	--	--	--	--	--	--	--	0.4*	0.4	--	--	--	270
A	--	100	--	--	--	--	--	--	--	--	--	--	--	--	--	--	--	36
C	--	100	--	--	--	--	--	--	--	--	--	--	--	--	--	--	--	100
E	--	94.4*	5.1*	--	--	--	--	--	0.6	--	--	--	--	--	--	--	--	178
M	--	10.8*	1.6*	0.4*	--	0.4	--	--	--	--	--	--	--	--	--	0.8	86	250
Collective Score
Aln	Xch	Ych	PE	PES	Cov1	Cov3	C1+C3	WC	WCGU	XCons	YCons	DfDel	PNuc	Seq
T	9	5	2	0.29	0.7	0.99	1.69	0.99	0.99	0.47	0.49	0	0.59	834
3	3	2	2	0.8	0.75	0.99	1.74	0.99	0.99	1.78	1.79	0	0.77	484
B	1	1	1	1	0.5	1	1.5	0.99	0.99	1.94	1.92	0	0.83	270
A	0	0	0	0	0	0	0	1	1	2	2	0	0.88	36
C	0	0	0	0	0	0	0	1	1	2	2	0	0.97	100
E	2	1	1	0.67	0.9	0.99	1.89	0.99	0.99	1.6	1.63	0	0.68	178
M	6	3	0	0	0.62	0.91	1.54	0.91	0.94	-0.49	-0.52	0	0.11	250
Helix 11	Base Pair (184:212)		BPC: cWW	AI: --	Strong
Frequency
Aln	GC	CG	UA	AU	GU	UG	AA	AC	AG	CA	CC	CU	GA	GG	UC	UU	gap	Seq
T	10.7*	55.4*	5.6*	0.7*	1.9	0.4	0.1	--	0.1	--	--	--	--	--	--	0.2	24.7	834
3	17.8*	77.7*	1.7*	--	2.3	0.6	--	--	--	--	--	--	--	--	--	--	--	484
B	22.6*	71.5*	0.7*	--	4.1	1.1	--	--	--	--	--	--	--	--	--	--	--	270
A	36.1*	55.6*	8.3*	--	--	--	--	--	--	--	--	--	--	--	--	--	--	36
C	--	82.0*	18.0*	--	--	--	--	--	--	--	--	--	--	--	--	--	--	100
E	6.7*	91.6*	1.7*	--	--	--	--	--	--	--	--	--	--	--	--	--	--	178
M	1.2*	1.6*	8.4*	2.4*	2	--	0.4	--	0.4	--	--	--	--	--	--	0.8	82.8	250
Collective Score
Aln	Xch	Ych	PE	PES	Cov1	Cov3	C1+C3	WC	WCGU	XCons	YCons	DfDel	PNuc	Seq
T	35	36	29	0.82	0.86	0.96	1.82	0.96	0.99	-0.16	-0.19	0	0.6	834
3	17	19	15	0.83	0.87	0.97	1.84	0.97	1	1.13	1.07	0	0.77	484
B	10	12	8	0.73	0.82	0.95	1.77	0.95	1	1.04	0.94	0	0.83	270
A	3	3	3	1	1	1	2	1	1	0.7	0.7	0	0.88	36
C	8	8	8	1	1	1	2	1	1	1.32	1.32	0	0.97	100
E	4	4	4	1	1	1	2	1	1	1.52	1.54	0	0.68	178
M	10	9	6	0.63	0.59	0.79	1.38	0.79	0.91	-0.62	-0.62	0.01	0.14	250
Helix 11	Base Pair (185:211)		BPC: cWW	AI: --	Strong
Frequency
Aln	GC	CG	UA	AU	GU	UG	AA	AC	AG	CA	CC	CU	GA	GG	UC	UU	gap	Seq
T	6.6*	48.3*	15.1*	4.0*	0.4	0.5	--	0.1	0.1	0.1	--	--	--	--	0.1	--	24.8	835
3	10.7*	69.3*	14.2*	4.1*	0.6	0.6	--	--	--	0.2	--	--	--	--	0.2	--	--	485
B	15.6*	50.0*	24.8*	7.4*	1.1	0.7	--	--	--	--	--	--	--	--	0.4	--	--	270
A	8.3*	88.9*	2.8*	--	--	--	--	--	--	--	--	--	--	--	--	--	--	36
C	2.0*	59.0*	38.0*	--	--	1	--	--	--	--	--	--	--	--	--	--	--	100
E	3.9*	94.4*	0.6*	--	--	0.6	--	--	--	0.6	--	--	--	--	--	--	--	179
M	0.4*	3.2*	7.6*	5.2*	--	--	--	0.4	0.4	--	--	--	--	--	--	--	82.8	250
Collective Score
Aln	Xch	Ych	PE	PES	Cov1	Cov3	C1+C3	WC	WCGU	XCons	YCons	DfDel	PNuc	Seq
T	44	42	39	0.91	0.95	0.98	1.93	0.98	0.99	-0.38	-0.36	0	0.6	835
3	27	26	23	0.87	0.95	0.98	1.93	0.98	1	0.68	0.7	0	0.77	485
B	22	21	19	0.88	0.96	0.98	1.93	0.98	1	0.29	0.28	0	0.83	270
A	1	1	1	1	1	1	2	1	1	1.41	1.41	0	0.88	36
C	10	9	9	0.95	0.98	0.99	1.97	0.99	1	0.91	0.91	0	0.97	100
E	4	4	3	0.75	0.8	0.99	1.79	0.99	0.99	1.67	1.69	0	0.68	179
M	7	7	7	1	0.92	0.95	1.87	0.95	0.95	-0.6	-0.63	0.01	0.14	250
Helix 11	Base Pair (186:210)		BPC: cWW	AI: --	Strong
Frequency
Aln	GC	CG	UA	AU	GU	UG	AA	AC	AG	CA	CC	CU	GA	GG	UC	UU	gap	Seq
T	48.3*	4.2*	4.8*	16.0*	1.6	--	--	0.2	--	--	--	--	--	--	--	0.1	24.7	835
3	72.6*	6.8*	5.8*	12.4*	2.3	--	--	0.2	--	--	--	--	--	--	--	--	--	485
B	71.1*	--	4.4*	21.1*	3.3	--	--	--	--	--	--	--	--	--	--	--	--	270
A	33.3*	55.6*	11.1*	--	--	--	--	--	--	--	--	--	--	--	--	--	--	36
C	45.0*	--	--	52.0*	2	--	--	1	--	--	--	--	--	--	--	--	--	100
E	82.7*	7.3*	6.7*	1.7*	1.1	--	--	0.6	--	--	--	--	--	--	--	--	--	179
M	2.4*	0.8*	4.8*	8.8*	--	--	--	--	--	--	--	--	--	--	--	0.4	82.8	250
Collective Score
Aln	Xch	Ych	PE	PES	Cov1	Cov3	C1+C3	WC	WCGU	XCons	YCons	DfDel	PNuc	Seq
T	46	45	39	0.86	0.93	0.97	1.9	0.97	0.99	-0.33	-0.34	0	0.6	835
3	24	26	21	0.84	0.91	0.97	1.89	0.97	1	0.81	0.77	0	0.77	485
B	15	17	13	0.81	0.89	0.97	1.85	0.97	1	1.01	0.96	0	0.83	270
A	3	3	3	1	1	1	2	1	1	0.65	0.65	0	0.88	36
C	12	11	10	0.87	0.94	0.97	1.91	0.97	0.99	1	1	0	0.97	100
E	6	6	5	0.83	0.9	0.98	1.89	0.98	0.99	1.13	1.1	0	0.68	179
M	10	8	8	0.89	0.95	0.98	1.93	0.98	0.98	-0.6	-0.61	0	0.14	250
Helix 11	Base Pair (187:209)		BPC: cWW	AI: --	Strong
Frequency
Aln	GC	CG	UA	AU	GU	UG	AA	AC	AG	CA	CC	CU	GA	GG	UC	UU	gap	Seq
T	41.9*	28.3*	2.4*	1.9*	0.1	0.2	--	0.1	0.1	--	--	--	--	--	--	--	24.9	833
3	47.4*	48.0*	3.7*	--	0.2	0.4	--	--	0.2	--	--	--	--	--	--	--	--	483
B	79.2*	19.7*	--	--	0.4	0.4	--	--	0.4	--	--	--	--	--	--	--	--	269
A	44.4*	55.6*	--	--	--	--	--	--	--	--	--	--	--	--	--	--	--	36
C	93.0*	2.0*	--	4.0*	--	--	--	1	--	--	--	--	--	--	--	--	--	100
E	--	89.3*	10.1*	--	--	0.6	--	--	--	--	--	--	--	--	--	--	--	178
M	10.8*	0.8*	0.8*	4.8*	--	--	--	--	--	--	--	--	--	--	--	--	82.8	250
Collective Score
Aln	Xch	Ych	PE	PES	Cov1	Cov3	C1+C3	WC	WCGU	XCons	YCons	DfDel	PNuc	Seq
T	18	14	15	0.94	0.98	0.99	1.97	0.99	1	-0.3	-0.3	0	0.6	833
3	7	5	4	0.67	0.98	0.99	1.98	0.99	1	0.77	0.79	0	0.77	483
B	3	2	1	0.4	0.95	0.99	1.94	0.99	1	1.22	1.24	0	0.82	269
A	2	2	2	1	1	1	2	1	1	1.01	1.01	0	0.88	36
C	4	3	3	0.86	0.86	0.99	1.85	0.99	0.99	1.57	1.62	0	0.97	100
E	2	1	1	0.67	0.95	0.99	1.94	0.99	1	1.51	1.54	0	0.68	178
M	7	6	8	1	1	1	2	1	1	-0.6	-0.65	0.01	0.14	250
Helix 11	Base Pair (188:208)		BPC: cWW	AI: --	Strong
Frequency
Aln	GC	CG	UA	AU	GU	UG	AA	AC	AG	CA	CC	CU	GA	GG	UC	UU	gap	Seq
T	18.8*	7.4*	28.6*	1.1*	--	12	--	2.9	--	3.8	0.2	--	0.1	--	--	--	25.1	836
3	31.1*	5.8*	41.4*	1.0*	--	8.2	--	4.9	--	6.4	0.4	--	0.2	--	--	--	0.6	486
B	49.4*	4.1*	17.7*	0.4*	--	12.9	--	8.9	--	4.8	0.7	--	--	--	--	--	1.1	271
A	36.1*	47.2*	--	11.1*	--	5.6	--	--	--	--	--	--	--	--	--	--	--	36
C	3.0*	22	18	1.0*	--	55.0*	--	--	--	1.0*	--	--	--	--	--	--	--	100
E	2.2*	--	85.5*	--	--	1.7	--	--	--	10.1	--	--	0.6	--	--	--	--	179
M	1.2*	4.8*	8.0*	1.2*	--	2	--	--	--	--	--	--	--	--	--	--	82.8	250
Collective Score
Aln	Xch	Ych	PE	PES	Cov1	Cov3	C1+C3	WC	WCGU	XCons	YCons	DfDel	PNuc	Seq
T	46	38	15	0.36	0.59	0.75	1.33	0.75	0.91	-0.53	-0.53	0.01	0.6	836
3	27	19	7	0.3	0.65	0.8	1.45	0.8	0.88	0.32	0.46	0	0.77	486
B	19	13	4	0.25	0.45	0.72	1.17	0.72	0.85	0.28	0.54	0	0.82	271
A	2	3	2	0.8	0.9	0.94	1.84	0.94	1	0.37	0.63	0	0.88	36
C	9	8	2	0.23	0.11	0	0.11	0.44	0.99	0.96	1.04	0	0.97	100
E	6	3	1	0.22	0.15	0	0.15	0.88	0.89	1.35	1.73	0	0.68	179
M	10	11	6	0.57	0.78	0.88	1.67	0.88	1	-0.63	-0.74	0.02	0.14	250
Helix 11	Base Pair (194:201)		BPC: cWW	AI: --	Strong
Frequency
Aln	GC	CG	UA	AU	GU	UG	AA	AC	AG	CA	CC	CU	GA	GG	UC	UU	gap	Seq
T	53.3*	0.4*	21.8*	21.3*	--	0.1	--	--	--	--	--	0.1	--	--	--	0.8	2.1	840
3	63.2*	--	36.2*	0.4*	--	--	--	--	--	--	--	--	--	--	--	--	0.2	486
B	99.3*	--	--	0.7*	--	--	--	--	--	--	--	--	--	--	--	--	--	271
A	100	--	--	--	--	--	--	--	--	--	--	--	--	--	--	--	--	36
C	100	--	--	--	--	--	--	--	--	--	--	--	--	--	--	--	--	100
E	1.1*	--	98.3*	--	--	--	--	--	--	--	--	--	--	--	--	--	0.6	179
M	16.1*	1.2*	2.8*	69.7*	--	0.4	--	--	--	--	--	0.4	--	--	--	2.8	6.7	254
Collective Score
Aln	Xch	Ych	PE	PES	Cov1	Cov3	C1+C3	WC	WCGU	XCons	YCons	DfDel	PNuc	Seq
T	13	8	10	0.95	0.98	0.99	1.97	0.99	0.99	0.36	0.35	0	0.79	840
3	2	1	2	1	1	1	2	1	1	1	0.99	0	0.77	486
B	1	1	1	1	1	1	2	1	1	1.94	1.94	0	0.83	271
A	0	0	0	0	0	0	0	1	1	2	2	0	0.88	36
C	0	0	0	0	0	0	0	1	1	2	2	0	0.97	100
E	1	0	1	1	1	1	2	1	1	1.85	1.85	0	0.68	179
M	11	7	8	0.89	0.85	0.96	1.81	0.96	0.97	0.48	0.61	0	0.76	254
Helix 11	Base Pair (195:200)		BPC: tSH	AI: --	Strong
Frequency
Aln	GC	CG	UA	AU	GU	UG	AA	AC	AG	CA	CC	CU	GA	GG	UC	UU	gap	Seq
T	--	--	1.2*	95.8*	0.1	--	0.5	0.2	--	--	--	--	--	--	--	--	2.1	840
3	--	--	--	99.6	0.2	--	--	--	--	--	--	--	--	--	--	--	0.2	486
B	--	--	--	100	--	--	--	--	--	--	--	--	--	--	--	--	--	271
A	--	--	--	100	--	--	--	--	--	--	--	--	--	--	--	--	--	36
C	--	--	--	100	--	--	--	--	--	--	--	--	--	--	--	--	--	100
E	--	--	--	98.9	0.6	--	--	--	--	--	--	--	--	--	--	--	0.6	179
M	--	--	3.9*	87.0*	--	--	1.6	0.8	--	--	--	--	--	--	--	--	6.7	254
Collective Score
Aln	Xch	Ych	PE	PES	Cov1	Cov3	C1+C3	WC	WCGU	XCons	YCons	DfDel	PNuc	Seq
T	4	5	3	0.67	0.59	0.99	1.58	0.99	0.99	1.69	1.66	0	0.79	840
3	0	0	0	0	0	0	0	1	1	1.93	1.98	0	0.77	486
B	0	0	0	0	0	0	0	1	1	2	2	0	0.83	271
A	0	0	0	0	0	0	0	1	1	2	2	0	0.88	36
C	0	0	0	0	0	0	0	1	1	2	2	0	0.97	100
E	0	0	0	0	0	0	0	0.99	1	1.84	1.94	0	0.68	179
M	4	5	3	0.67	0.62	0.97	1.6	0.97	0.97	1.28	1.15	0	0.76	254
Helix 12	Base Pair (224:231)		BPC: cWW	AI: --	Strong
Frequency
Aln	GC	CG	UA	AU	GU	UG	AA	AC	AG	CA	CC	CU	GA	GG	UC	UU	gap	Seq
T	20.9*	19.0*	25.5*	9.7*	--	--	0.5	--	--	0.1	--	--	0.1	--	--	--	24.2	865
3	16.6*	31.9*	35.8*	15.5*	--	--	--	--	--	0.2	--	--	--	--	--	--	--	511
B	27.4*	--	59.9*	12.6*	--	--	--	--	--	--	--	--	--	--	--	--	--	277
A	22.2*	30.6*	36.1*	11.1*	--	--	--	--	--	--	--	--	--	--	--	--	--	36
C	96.0*	--	--	4.0*	--	--	--	--	--	--	--	--	--	--	--	--	--	100
E	0.5*	76.8*	2.0*	20.2*	--	--	--	--	--	0.5	--	--	--	--	--	--	--	198
M	--	0.4*	15.0*	0.4*	--	--	1.6	--	--	--	--	--	0.4	--	--	--	82.3	254
Collective Score
Aln	Xch	Ych	PE	PES	Cov1	Cov3	C1+C3	WC	WCGU	XCons	YCons	DfDel	PNuc	Seq
T	26	23	23	0.94	0.99	0.99	1.98	0.99	0.99	-0.75	-0.73	0	0.63	865
3	19	20	17	0.87	1	1	2	1	1	0.1	0.1	0	0.81	511
B	8	8	6	0.75	1	1	2	1	1	0.67	0.67	0	0.85	277
A	5	5	5	1	1	1	2	1	1	0.11	0.11	0	0.88	36
C	2	2	2	1	1	1	2	1	1	1.76	1.76	0	0.97	100
E	6	7	6	0.92	0.98	0.99	1.97	0.99	0.99	1.09	1.07	0	0.75	198
M	5	1	4	1	0.29	0.89	1.18	0.89	0.89	-0.46	-0.44	0.01	0.14	254
Helix 12	Base Pair (225:230)		BPC: cWW	AI: --	Strong
Frequency
Aln	GC	CG	UA	AU	GU	UG	AA	AC	AG	CA	CC	CU	GA	GG	UC	UU	gap	Seq
T	0.1*	51.3*	19.4*	3.7*	0.1	--	--	--	0.2	0.1	--	0.1	--	--	--	0.6	24.3	863
3	0.2*	60.7*	31.4*	6.1*	--	--	--	--	0.4	0.2	--	0.2	--	--	--	0.6	0.2	509
B	--	85.9*	2.2*	11.2*	--	--	--	--	0.7	--	--	--	--	--	--	--	--	276
A	--	100	--	--	--	--	--	--	--	--	--	--	--	--	--	--	--	36
C	--	95.0*	5.0*	--	--	--	--	--	--	--	--	--	--	--	--	--	--	100
E	0.5*	18.3*	78.2*	--	--	--	--	--	--	0.5	--	0.5	--	--	--	1.5	0.5	197
M	--	15.4*	0.8*	0.4	0.4*	--	--	--	--	--	--	--	--	--	--	0.8	82.3	254
Collective Score
Aln	Xch	Ych	PE	PES	Cov1	Cov3	C1+C3	WC	WCGU	XCons	YCons	DfDel	PNuc	Seq
T	18	22	19	0.95	0.95	0.98	1.94	0.98	0.99	-0.14	-0.15	0	0.62	863
3	13	17	13	0.87	0.96	0.99	1.95	0.99	0.99	0.74	0.73	0	0.81	509
B	8	10	8	0.89	0.95	0.99	1.94	0.99	0.99	1.32	1.34	0	0.85	276
A	0	0	0	0	0	0	0	1	1	2	2	0	0.88	36
C	2	2	2	1	1	1	2	1	1	1.71	1.71	0	0.97	100
E	5	7	5	0.83	0.88	0.97	1.85	0.97	0.97	1.2	1.08	0	0.74	197
M	3	3	4	1	0.5	0.93	1.43	0.93	0.96	-0.45	-0.47	0.01	0.14	254
Helix 12.1	Base Pair (234:430)		BPC: tWW	AI: B,R	Strong
Frequency
Aln	GC	CG	UA	AU	GU	UG	AA	AC	AG	CA	CC	CU	GA	GG	UC	UU	gap	Seq
T	--	3.8*	69.1*	0.1*	--	0.8	0.7	0.1	0.1	0.2	--	--	0.1	--	--	0.2	24.7	866
3	--	4.7*	92.6*	--	--	1.2	0.6	--	0.2	0.2	--	--	--	--	--	--	0.6	512
B	--	8.3*	91.3*	--	--	--	--	--	--	--	--	--	--	--	--	--	0.4	276
A	--	2.8*	91.7*	--	--	--	--	--	2.8	2.8	--	--	--	--	--	--	--	36
C	--	--	100	--	--	--	--	--	--	--	--	--	--	--	--	--	--	100
E	--	--	94.5	--	--	3	1.5	--	--	--	--	--	--	--	--	--	1	200
M	--	3.5*	9.4*	0.4*	--	0.4	1.2	0.4	--	0.4	--	--	0.4	--	--	0.8	83.1	254
Collective Score
Aln	Xch	Ych	PE	PES	Cov1	Cov3	C1+C3	WC	WCGU	XCons	YCons	DfDel	PNuc	Seq
T	10	12	6	0.55	0.63	0.97	1.6	0.97	0.98	0.39	0.44	0.01	0.62	866
3	7	7	5	0.71	0.69	0.98	1.66	0.98	0.99	1.59	1.68	0.01	0.81	512
B	5	6	5	0.91	1	1	2	1	1	1.54	1.58	0	0.84	276
A	1	0	0	0	0.33	0.94	1.28	0.94	0.94	1.51	1.7	0	0.88	36
C	0	0	0	0	0	0	0	1	1	2	2	0	0.97	100
E	1	1	0	0	0	0	0	0.95	0.98	1.79	1.82	0.01	0.75	200
M	3	5	1	0.25	0.53	0.79	1.32	0.79	0.81	-0.63	-0.53	0.04	0.14	254
Helix 13	Base Pair (235:262)		BPC: cWW	AI: --	Strong
Frequency
Aln	GC	CG	UA	AU	GU	UG	AA	AC	AG	CA	CC	CU	GA	GG	UC	UU	gap	Seq
T	1.4*	1.9*	67.7*	1.3*	0.9	0.8	0.1	0.1	--	0.3	--	0.1	0.5	--	--	0.9	24	863
3	2.4*	2.9*	90.2*	1.4*	1.4	0.8	--	0.2	--	--	--	--	--	--	--	0.2	0.6	509
B	0.7*	--	98.9*	--	--	--	--	0.4	--	--	--	--	--	--	--	--	--	274
A	27.8*	38.9*	11.1*	2.8*	19.4	--	--	--	--	--	--	--	--	--	--	--	--	36
C	--	--	97	--	--	3	--	--	--	--	--	--	--	--	--	--	--	100
E	--	0.5*	92.5*	3.0*	--	2	--	--	--	--	--	--	--	--	--	0.5	1.5	199
M	--	0.4*	11.0*	1.6*	0.4	--	0.4	--	--	1.2	--	0.4	1.6	--	--	2.8	80.4	254
Collective Score
Aln	Xch	Ych	PE	PES	Cov1	Cov3	C1+C3	WC	WCGU	XCons	YCons	DfDel	PNuc	Seq
T	25	21	13	0.56	0.54	0.95	1.49	0.95	0.97	0.49	0.28	0.08	0.63	863
3	9	13	8	0.73	0.72	0.97	1.7	0.97	1	1.4	1.41	0.01	0.8	509
B	2	3	1	0.4	0.67	1	1.66	1	1	1.9	1.88	0	0.84	274
A	4	4	3	0.75	0.68	0.81	1.49	0.81	1	0.46	0.12	0	0.88	36
C	0	2	0	0	0	0	0	0.97	1	2	1.81	0	0.97	100
E	3	6	4	0.89	0.58	0.97	1.56	0.97	0.99	1.62	1.62	0.01	0.74	199
M	16	6	5	0.46	0.23	0.66	0.89	0.66	0.68	-0.74	-0.55	0.28	0.16	254
Helix 13	Base Pair (236:261)		BPC: cWW	AI: --	Strong
Frequency
Aln	GC	CG	UA	AU	GU	UG	AA	AC	AG	CA	CC	CU	GA	GG	UC	UU	gap	Seq
T	4.6*	57.7*	11.8*	8.9*	1.3	0.1	1.7	0.5	0.1	1.2	0.6	0.8	--	--	0.6	1.8	8.3	865
3	6.7*	77.1*	12.9*	0.8*	--	0.2	--	--	--	0.6	0.2	0.4	--	--	--	--	1.2	511
B	4.0*	81.2*	12.3*	0.4*	--	--	--	--	--	--	0.4	0.4	--	--	--	--	1.4	276
A	--	75.0*	25.0*	--	--	--	--	--	--	--	--	--	--	--	--	--	--	36
C	--	85.0*	12.0*	--	--	--	--	--	--	1	2	--	--	--	--	--	--	100
E	11.6*	71.9*	11.6*	1.5*	--	0.5	--	--	--	1.5	--	0.5	--	--	--	--	1	199
M	2.4*	7.9*	9.4*	28.7*	4.3	--	5.9	1.6	0.4	2.4	0.8	2	--	--	2	6.3	26.1	254
Collective Score
Aln	Xch	Ych	PE	PES	Cov1	Cov3	C1+C3	WC	WCGU	XCons	YCons	DfDel	PNuc	Seq
T	53	53	33	0.62	0.74	0.91	1.65	0.91	0.92	0.27	0.07	0.03	0.76	865
3	19	19	14	0.74	0.94	0.99	1.92	0.99	0.99	1.03	0.87	0.01	0.8	511
B	8	9	6	0.71	0.96	0.99	1.95	0.99	0.99	1.2	1.02	0.01	0.83	276
A	2	2	2	1	1	1	2	1	1	1.19	1.19	0	0.88	36
C	7	8	7	0.93	0.8	0.97	1.77	0.97	0.97	1.47	1.3	0	0.97	100
E	9	8	6	0.71	0.91	0.97	1.88	0.97	0.98	0.84	0.69	0.01	0.75	199
M	27	26	12	0.45	0.43	0.65	1.09	0.65	0.71	-0.27	-0.49	0.08	0.6	254
Helix 13	Base Pair (237:260)		BPC: cWW	AI: --	Strong
Frequency
Aln	GC	CG	UA	AU	GU	UG	AA	AC	AG	CA	CC	CU	GA	GG	UC	UU	gap	Seq
T	0.3*	72.6*	6.6*	3.1*	--	3.7	0.5	0.1	0.9	0.6	0.6	0.9	0.2	--	1	3.9	4.7	864
3	--	92.0*	1.8*	--	--	4.7	--	--	--	--	0.4	--	--	--	--	--	1.2	510
B	--	94.9	--	--	--	4.7	--	--	--	--	--	--	--	--	--	--	0.4	274
A	--	100	--	--	--	--	--	--	--	--	--	--	--	--	--	--	--	36
C	--	93.0*	3.0*	--	--	2	--	--	--	--	2	--	--	--	--	--	--	100
E	--	86.5*	4.5*	--	--	5.5	--	--	--	--	1	--	--	--	--	--	2.5	200
M	1.2*	25.6*	17.7*	10.6*	--	2.4	1.6	0.4	3.1	2	0.4	3.1	0.8	--	3.5	13.4	14.3	254
Collective Score
Aln	Xch	Ych	PE	PES	Cov1	Cov3	C1+C3	WC	WCGU	XCons	YCons	DfDel	PNuc	Seq
T	36	31	12	0.36	0.45	0.87	1.31	0.87	0.91	0.79	0.72	0.01	0.79	864
3	7	4	1	0.18	0.26	0.95	1.21	0.95	1	1.66	1.72	0.01	0.8	510
B	4	0	0	0	0	0	0	0.95	1	1.73	1.96	0	0.84	274
A	0	0	0	0	0	0	0	1	1	2	2	0	0.88	36
C	4	3	2	0.57	0.43	0.96	1.39	0.96	0.98	1.71	1.67	0	0.97	100
E	3	4	1	0.29	0.41	0.93	1.34	0.93	0.99	1.53	1.44	0.02	0.74	200
M	25	24	9	0.37	0.49	0.64	1.13	0.64	0.67	-0.18	-0.37	0.01	0.7	254
Helix 13	Base Pair (238:259)		BPC: cWW	AI: --	Strong
Frequency
Aln	GC	CG	UA	AU	GU	UG	AA	AC	AG	CA	CC	CU	GA	GG	UC	UU	gap	Seq
T	13.8*	63.6*	5.9*	4.3*	1.4	--	0.1	0.3	--	0.2	0.6	0.8	0.1	--	0.7	4.4	3.7	867
3	19.1*	73.7*	4.7*	--	1.8	--	--	--	--	--	--	--	--	--	--	--	0.8	513
B	28.3*	67.0*	--	--	3.3	--	--	--	--	--	--	--	--	--	--	--	1.5	276
A	52.8*	47.2*	--	--	--	--	--	--	--	--	--	--	--	--	--	--	--	36
C	--	98	--	--	--	--	--	--	--	--	2	--	--	--	--	--	--	100
E	0.5*	87.6*	11.9*	--	--	--	--	--	--	--	--	--	--	--	--	--	--	201
M	8.7*	29.5*	10.6	14.6	1.2	--	0.4*	1.2	--	0.8	1.2	2.8	0.4	--	2.4	15.0*	11.5	254
Collective Score
Aln	Xch	Ych	PE	PES	Cov1	Cov3	C1+C3	WC	WCGU	XCons	YCons	DfDel	PNuc	Seq
T	48	41	30	0.67	0.73	0.91	1.65	0.91	0.92	0.43	0.32	0.01	0.8	867
3	19	20	19	0.97	0.93	0.98	1.91	0.98	1	0.97	0.83	0.01	0.81	513
B	13	14	14	1	0.9	0.97	1.86	0.97	1	1.05	0.82	0.01	0.83	276
A	1	1	0	0	1	1	2	1	1	1	1	0	0.88	36
C	0	1	0	0	0	0	0	0.98	0.98	2	1.86	0	0.97	100
E	5	5	5	1	1	1	2	1	1	1.43	1.42	0	0.76	201
M	29	20	11	0.45	0.41	0.6	1.01	0.72	0.73	-0.29	-0.37	0.02	0.72	254
Helix 13	Base Pair (239:258)		BPC: cWW	AI: --	Significant
Frequency
Aln	GC	CG	UA	AU	GU	UG	AA	AC	AG	CA	CC	CU	GA	GG	UC	UU	gap	Seq
T	5.7	5.5	22.5*	12.1*	2.5	21.2	1.4	--	0.1	4.4	5.9*	0.3	0.3	0.2*	9.6	4.7	3.3	866
3	3.3	8.2	20.3	4.9*	1	31.6*	--	--	--	3.9	9.8*	--	0.2*	0.4	13.9	2.1	0.4	512
B	5.1*	14.9	15.6	8.7*	0.7	46.7*	--	--	--	--	0.7	--	--	--	7.2	--	0.4	276
A	5.6*	2.8	8.3	--	--	77.8*	--	--	--	5.6*	--	--	--	--	--	--	--	36
C	29.0*	--	8	5	17	5	3	--	--	4.0*	--	--	1	--	12	16.0*	--	100
E	0.5	--	29.0*	0.5	1.5*	2.5	--	--	--	9	24.0*	--	0.5	1	25.5	5.5	0.5	200
M	1.2*	2.4*	32.7*	29.5*	--	6.7	3.5	--	0.4	5.5	0.4	1.2	0.4	--	--	5.5	10.7	254
Collective Score
Aln	Xch	Ych	PE	PES	Cov1	Cov3	C1+C3	WC	WCGU	XCons	YCons	DfDel	PNuc	Seq
T	88	82	33	0.39	0.25	0.42	0.67	0.47	0.72	0.25	-0.19	0.01	0.8	866
3	52	42	18	0.38	0.22	0.47	0.69	0.37	0.7	0.71	0.13	0	0.81	512
B	27	21	9	0.38	0.26	0.61	0.87	0.44	0.92	0.67	0.41	0	0.84	276
A	3	3	2	0.67	0.5	0.89	1.39	0.17	0.94	1.28	1.12	0	0.88	36
C	11	19	6	0.4	0.28	0.49	0.77	0.42	0.64	0.48	0.3	0	0.97	100
E	22	18	7	0.35	0.36	0.55	0.91	0.3	0.34	0.84	0.47	0	0.76	200
M	25	21	9	0.39	0.58	0.74	1.32	0.74	0.81	0.08	-0.01	0.02	0.73	254
Helix 13	Base Pair (245:253)		BPC: cWW	AI: --	Strong
Frequency
Aln	GC	CG	UA	AU	GU	UG	AA	AC	AG	CA	CC	CU	GA	GG	UC	UU	gap	Seq
T	53.0*	3.2*	16.1*	15.8*	3.2	0.1	0.2	5.2	--	0.5	0.1	--	0.1	0.1	0.1	0.5	1.7	868
3	63.4*	0.4*	--	22.6*	5.1	--	--	8.2	--	--	--	--	--	0.2	0.2	--	--	514
B	98.9	--	--	--	--	--	--	0.4	--	--	--	--	--	0.4	0.4	--	--	277
A	66.7*	2.8*	--	25.0*	2.8	--	--	2.8	--	--	--	--	--	--	--	--	--	36
C	100	--	--	--	--	--	--	--	--	--	--	--	--	--	--	--	--	100
E	13.9*	0.5*	--	53.2*	12.4	--	--	19.9	--	--	--	--	--	--	--	--	--	201
M	13.4*	10.2*	55.1*	8.3*	0.8	0.4	0.8	1.2	--	1.6	0.4	--	0.4	--	--	1.6	5.9	254
Collective Score
Aln	Xch	Ych	PE	PES	Cov1	Cov3	C1+C3	WC	WCGU	XCons	YCons	DfDel	PNuc	Seq
T	23	25	14	0.58	0.78	0.9	1.67	0.9	0.93	0.31	0.35	0	0.82	868
3	10	10	4	0.4	0.63	0.86	1.49	0.86	0.91	1.06	1.1	0	0.82	514
B	1	0	0	0	0	0	0	0.99	0.99	1.93	1.97	0	0.85	277
A	2	3	0	0	0.83	0.94	1.78	0.94	0.97	0.98	0.98	0	0.88	36
C	0	0	0	0	0	0	0	1	1	2	2	0	0.97	100
E	7	7	4	0.57	0.31	0.68	0.98	0.68	0.8	1.12	1.03	0	0.76	201
M	13	15	10	0.71	0.82	0.93	1.74	0.93	0.94	0.07	0.09	0	0.77	254
Helix 13	Base Pair (246:252)		BPC: cWW	AI: --	Strong
Frequency
Aln	GC	CG	UA	AU	GU	UG	AA	AC	AG	CA	CC	CU	GA	GG	UC	UU	gap	Seq
T	8.4*	52.4*	6.6*	14.4*	0.1	15.2	0.1	--	--	0.1	0.1	0.1	0.1	--	--	0.5	1.8	868
3	4.5*	70.2*	4.1*	1.6*	0.2	19.1	--	--	--	--	0.2	--	--	--	--	--	0.2	514
B	--	63.9*	0.4*	0.4*	--	34.7	--	--	--	--	0.4	--	--	--	--	--	0.4	277
A	55.6*	13.9*	13.9*	13.9*	2.8	--	--	--	--	--	--	--	--	--	--	--	--	36
C	--	79.0*	6.0*	--	--	15	--	--	--	--	--	--	--	--	--	--	--	100
E	1.5*	89.1*	7.5*	1.0*	--	1	--	--	--	--	--	--	--	--	--	--	--	201
M	19.7*	5.9*	11.8*	46.1*	--	7.5	0.4	--	--	0.4	--	0.4	0.4	--	--	1.6	5.9	254
Collective Score
Aln	Xch	Ych	PE	PES	Cov1	Cov3	C1+C3	WC	WCGU	XCons	YCons	DfDel	PNuc	Seq
T	43	33	24	0.63	0.64	0.83	1.48	0.83	0.99	0.18	0.49	0	0.81	868
3	20	15	13	0.74	0.34	0.81	1.15	0.81	1	0.83	1.34	0	0.81	514
B	9	2	2	0.36	0.02	0	0.02	0.65	1	1.03	1.85	0	0.85	277
A	4	5	4	0.89	0.94	0.97	1.91	0.97	1	0.36	0.31	0	0.88	36
C	7	3	1	0.2	0.29	0.85	1.14	0.85	1	1.26	1.67	0	0.97	100
E	7	8	7	0.93	0.91	0.99	1.9	0.99	1	1.34	1.43	0	0.76	201
M	16	15	10	0.65	0.78	0.89	1.67	0.89	0.97	-0.07	-0.1	0	0.77	254
Helix 14	Base Pair (265:427)		BPC: tSS	AI: --	Strong
Frequency
Aln	GC	CG	UA	AU	GU	UG	AA	AC	AG	CA	CC	CU	GA	GG	UC	UU	gap	Seq
T	0.2*	--	0.5*	72.2*	1	--	0.8	--	--	--	--	0.1	--	--	0.1	0.3	24.7	869
3	--	--	--	96.9*	1	--	1	--	--	--	--	0.2	--	--	0.2*	0.6	0.2	515
B	--	--	--	97.5	0.7	--	1.8	--	--	--	--	--	--	--	--	--	--	277
A	--	--	--	100	--	--	--	--	--	--	--	--	--	--	--	--	--	36
C	--	--	--	97	2	--	1	--	--	--	--	--	--	--	--	--	--	100
E	--	--	--	95.5*	1.5	--	--	--	--	--	--	0.5	--	--	0.5*	1.5	0.5	202
M	0.8*	--	1.6*	12.2*	0.8	--	0.4	--	--	--	--	--	--	--	--	--	84.3	254
Collective Score
Aln	Xch	Ych	PE	PES	Cov1	Cov3	C1+C3	WC	WCGU	XCons	YCons	DfDel	PNuc	Seq
T	12	8	4	0.4	0.22	0.97	1.19	0.97	0.98	0.53	0.58	0	0.63	869
3	6	2	0	0	0.07	0	0.07	0.97	0.98	1.81	1.89	0	0.82	515
B	1	1	0	0	0	0	0	0.97	0.98	1.94	1.87	0	0.85	277
A	0	0	0	0	0	0	0	1	1	2	2	0	0.88	36
C	0	1	0	0	0	0	0	0.97	0.99	1.86	1.92	0	0.97	100
E	5	1	0	0	0.12	0	0.12	0.96	0.97	1.65	1.92	0	0.76	202
M	6	5	4	0.73	0.67	0.93	1.59	0.93	0.97	-0.46	-0.45	0.01	0.13	254
Helix 14	Base Pair (266:426)		BPC: cWW	AI: --	Strong
Frequency
Aln	GC	CG	UA	AU	GU	UG	AA	AC	AG	CA	CC	CU	GA	GG	UC	UU	gap	Seq
T	71.2*	--	0.1*	3.9*	--	--	--	--	--	--	--	--	--	--	--	0.1	24.6	868
3	94.7*	--	--	5.3*	--	--	--	--	--	--	--	--	--	--	--	--	--	514
B	100	--	--	--	--	--	--	--	--	--	--	--	--	--	--	--	--	276
A	97.2*	--	--	2.8*	--	--	--	--	--	--	--	--	--	--	--	--	--	36
C	99.0*	--	--	1.0*	--	--	--	--	--	--	--	--	--	--	--	--	--	100
E	87.1*	--	--	12.9*	--	--	--	--	--	--	--	--	--	--	--	--	--	202
M	12.6*	--	0.4*	2.4*	--	--	--	--	--	--	--	--	--	--	--	0.4	84.3	254
Collective Score
Aln	Xch	Ych	PE	PES	Cov1	Cov3	C1+C3	WC	WCGU	XCons	YCons	DfDel	PNuc	Seq
T	9	9	9	1	0.97	1	1.97	1	1	0.45	0.48	0	0.63	868
3	2	2	2	1	1	1	2	1	1	1.7	1.7	0	0.82	514
B	0	0	0	0	0	0	0	1	1	2	2	0	0.85	276
A	1	1	1	1	1	1	2	1	1	1.82	1.82	0	0.88	36
C	1	1	1	1	1	1	2	1	1	1.92	1.92	0	0.97	100
E	1	1	1	1	1	1	2	1	1	1.45	1.45	0	0.77	202
M	6	6	6	1	0.88	0.97	1.85	0.97	0.97	-0.47	-0.45	0.01	0.13	254
Helix 14	Base Pair (267:425)		BPC: cWW	AI: --	Strong
Frequency
Aln	GC	CG	UA	AU	GU	UG	AA	AC	AG	CA	CC	CU	GA	GG	UC	UU	gap	Seq
T	10.1*	57.4*	4.0*	2.4*	0.2	0.3	0.5	--	--	--	0.1	--	0.1	0.1	--	--	24.7	868
3	14.0*	77.0*	4.3*	3.9*	0.4	0.4	--	--	--	--	--	--	--	--	--	--	--	514
B	23.2*	67.4*	2.2*	6.9*	0.4	--	--	--	--	--	--	--	--	--	--	--	--	276
A	22.2*	61.1*	13.9*	--	2.8	--	--	--	--	--	--	--	--	--	--	--	--	36
C	--	89.0*	6.0*	--	--	1	3	--	--	--	--	--	--	1	--	--	--	100
E	--	93.1*	5.4*	0.5*	--	1	--	--	--	--	--	--	--	--	--	--	--	202
M	6.3*	5.1*	2.8*	0.4*	--	--	0.4	--	--	--	0.4	--	0.4	--	--	--	84.3	254
Collective Score
Aln	Xch	Ych	PE	PES	Cov1	Cov3	C1+C3	WC	WCGU	XCons	YCons	DfDel	PNuc	Seq
T	32	28	25	0.83	0.92	0.98	1.91	0.98	0.99	-0.14	-0.1	0	0.63	868
3	16	15	13	0.84	0.97	0.99	1.96	0.99	1	0.92	0.96	0	0.82	514
B	7	7	6	0.86	0.99	1	1.99	1	1	0.74	0.74	0	0.85	276
A	2	3	2	0.8	0.93	0.97	1.9	0.97	1	0.67	0.56	0	0.88	36
C	7	5	5	0.83	0.55	0.95	1.5	0.95	0.96	1.36	1.56	0	0.97	100
E	7	5	5	0.83	0.86	0.99	1.85	0.99	1	1.61	1.67	0	0.77	202
M	9	8	7	0.82	0.88	0.93	1.8	0.93	0.93	-0.58	-0.59	0	0.13	254
Helix 14	Base Pair (268:424)		BPC: cWW	AI: --	Strong
Frequency
Aln	GC	CG	UA	AU	GU	UG	AA	AC	AG	CA	CC	CU	GA	GG	UC	UU	gap	Seq
T	3.0*	59.0*	10.2*	0.5*	--	1.4	0.3	--	--	0.3	--	--	--	0.3	--	0.2	24.6	869
3	4.9*	76.7*	15.3*	0.6*	--	2.1	--	--	--	0.4	--	--	--	--	--	--	--	515
B	6.9*	93.1*	--	--	--	--	--	--	--	--	--	--	--	--	--	--	--	277
A	16.7*	72.2*	2.8*	8.3*	--	--	--	--	--	--	--	--	--	--	--	--	--	36
C	--	96.0*	1	--	--	--	2.0*	--	--	1	--	--	--	--	--	--	--	100
E	--	55.0*	38.6*	--	--	5.4	--	--	--	1	--	--	--	--	--	--	--	202
M	0.4*	8.7*	3.5*	0.4*	--	0.4	0.4	--	--	--	--	--	--	1.2	--	0.8	84.3	254
Collective Score
Aln	Xch	Ych	PE	PES	Cov1	Cov3	C1+C3	WC	WCGU	XCons	YCons	DfDel	PNuc	Seq
T	25	27	20	0.77	0.84	0.96	1.8	0.96	0.98	-0.02	0.04	0	0.63	869
3	15	17	13	0.81	0.89	0.97	1.87	0.97	1	1.02	1.07	0	0.82	515
B	2	2	2	1	1	1	2	1	1	1.64	1.64	0	0.85	277
A	2	2	2	1	1	1	2	1	1	0.79	0.81	0	0.88	36
C	1	2	0	0	0.5	0.98	1.48	0.97	0.97	1.78	1.76	0	0.97	100
E	11	13	9	0.75	0.86	0.94	1.79	0.94	0.99	1.01	1.04	0	0.77	202
M	9	8	7	0.82	0.61	0.82	1.44	0.82	0.85	-0.56	-0.54	0	0.13	254
Helix 16	Base Pair (271:366)		BPC: cWW	AI: --	Strong
Frequency
Aln	GC	CG	UA	AU	GU	UG	AA	AC	AG	CA	CC	CU	GA	GG	UC	UU	gap	Seq
T	3.7*	3.7*	1.3*	1.8*	0.1	1.8	0.1	0.3	0.9	--	0.1	--	0.2	0.6	2.3	0.8	82.2	872
3	5.4*	6.2*	1.9*	2.7*	0.2	2.9	0.2	0.4	1.2	--	0.2	--	0.2	1	3.9	1.2	72.6	518
B	27.4*	39.7*	4.3*	3.6*	0.4	1.1	0.4	--	--	--	--	--	0.7	1.1	0.4	--	21.1	277
A	22.2*	41.7*	13.9*	19.4*	--	2.8	--	--	--	--	--	--	--	--	--	--	--	36
C	--	--	1.0*	1	--	1	--	1	2.0*	--	--	--	--	--	--	1	93	100
E	--	8.3*	2.5	3.4*	0.5	6.9	0.5	1	2.9	--	0.5	--	--	2.5	9.8*	2.9	58.3	204
M	1.6*	--	--	0.4*	--	--	--	--	--	--	--	--	0.4	--	--	--	97.7	254
Collective Score
Aln	Xch	Ych	PE	PES	Cov1	Cov3	C1+C3	WC	WCGU	XCons	YCons	DfDel	PNuc	Seq
T	31	16	8	0.34	0.48	0.59	1.07	0.59	0.7	-0.97	-0.79	0.14	0.15	872
3	26	12	8	0.42	0.47	0.59	1.06	0.59	0.7	-0.94	-0.91	0.2	0.23	518
B	5	1	0	0	0.9	0.95	1.85	0.95	0.97	-0.36	-0.15	0.07	0.67	277
A	6	6	6	1	0.95	0.97	1.93	0.97	1	0.1	0.16	0	0.88	36
C	5	3	0	0	0.2	0	0.2	0.29	0.43	-0.68	-0.62	0.22	0.07	100
E	15	5	2	0.2	0.37	0.52	0.89	0.34	0.52	-0.47	-0.95	0.31	0.32	204
M	0	1	0	0	0.5	0.83	1.33	0.83	0.83	-0.22	-0.22	0	0.02	254
Helix 16	Base Pair (272:365)		BPC: cWW	AI: --	Strong
Frequency
Aln	GC	CG	UA	AU	GU	UG	AA	AC	AG	CA	CC	CU	GA	GG	UC	UU	gap	Seq
T	0.5*	2.4*	1.8*	3.9*	0.7	1.3	0.3	1.4	0.2	1.5	0.2	0.2	0.6	0.7	0.3	3.3	80.7	871
3	0.8*	3.7*	3.1*	6.6*	1	1.9	--	1.7	0.4	2.5	0.2	0.4	1	1.2	0.4	4.6	70.6	517
B	6.1*	7.6*	18.1*	42.2*	5.4	1.1	--	--	0.4	--	--	0.7	--	0.4	0.7	--	17.3	277
A	11.1*	52.8*	8.3*	22.2*	--	--	--	--	--	--	--	--	5.6	--	--	--	--	36
C	--	1	--	--	--	1	2.0*	2	--	--	1.0*	--	--	--	1	2.0*	90	100
E	--	--	3.4	3.9	2.5	3.9	--	4.4*	0.5	6.4*	0.5	1	0.5	2.5*	1	11.8*	57.7	203
M	--	0.4*	--	--	0.4	--	0.4*	0.4	--	--	--	--	--	--	--	1.2*	97.3	254
Collective Score
Aln	Xch	Ych	PE	PES	Cov1	Cov3	C1+C3	WC	WCGU	XCons	YCons	DfDel	PNuc	Seq
T	37	19	7	0.25	0.3	0.44	0.75	0.44	0.54	-0.98	-0.79	0.14	0.16	871
3	32	16	7	0.29	0.33	0.48	0.81	0.48	0.58	-0.95	-0.88	0.2	0.24	517
B	7	4	0	0	0.79	0.9	1.68	0.9	0.97	-0.4	-0.14	0.05	0.7	277
A	6	6	6	1	0.88	0.94	1.83	0.94	0.94	0.3	0.28	0	0.88	36
C	4	2	0	0	0.38	0.5	0.88	0.1	0.2	-0.92	-0.64	0.24	0.1	100
E	19	6	1	0.08	0.43	0.59	1.03	0.17	0.33	-0.58	-0.79	0.24	0.33	203
M	1	1	0	0	0.5	0.71	1.21	0.14	0.29	-0.23	-0.27	0.01	0.02	254
Helix 16	Base Pair (273:364)		BPC: cWW	AI: --	Strong
Frequency
Aln	GC	CG	UA	AU	GU	UG	AA	AC	AG	CA	CC	CU	GA	GG	UC	UU	gap	Seq
T	5.4*	2.2*	1.1	1	2.9	0.3	0.5*	0.3	1.3	0.3	3.8	0.2	0.1	0.5	1.3	1.8*	76.7	870
3	9.1*	3.5*	1.4	1.2	4.1	0.4	0.6*	0.4	2.1	0.6	6.4	0.4	--	0.4	2.1	2.9*	64.6	516
B	28.2*	19.5*	21.7*	7.2*	4.7	--	1.1	--	--	2.2	--	--	--	--	--	--	15.6	277
A	44.4*	41.7*	8.3*	--	--	5.6	--	--	--	--	--	--	--	--	--	--	--	36
C	--	1	2.0*	2.0*	1	--	1	1	--	--	--	--	--	2.0*	--	--	90	100
E	6.9	1.5	1.0*	2.5	4.4*	--	1.5	1	5.4*	1	16.3*	0.5	--	1	5.4	3.9	48	203
M	--	--	0.4*	0.4	1.2*	0.4	--	--	--	--	--	--	0.4	--	--	0.4	96.9	254
Collective Score
Aln	Xch	Ych	PE	PES	Cov1	Cov3	C1+C3	WC	WCGU	XCons	YCons	DfDel	PNuc	Seq
T	37	18	9	0.33	0.25	0.43	0.68	0.42	0.56	-0.95	-0.86	0.14	0.19	870
3	30	15	9	0.4	0.27	0.45	0.72	0.43	0.55	-0.83	-0.92	0.19	0.29	516
B	9	2	1	0.18	0.86	0.91	1.76	0.91	0.96	-0.47	-0.46	0.03	0.72	277
A	4	3	3	0.86	0.9	0.94	1.84	0.94	1	0.56	0.67	0	0.88	36
C	6	2	0	0	0.5	0.6	1.1	0.5	0.6	-0.89	-0.62	0.3	0.1	100
E	17	10	5	0.37	0.3	0.52	0.82	0.23	0.31	-0.72	-0.77	0.1	0.4	203
M	1	1	0	0	0.2	0	0.2	0.25	0.75	-0.23	-0.28	0.01	0.03	254
Helix 16	Base Pair (274:363)		BPC: cWW	AI: --	Weak
Frequency
Aln	GC	CG	UA	AU	GU	UG	AA	AC	AG	CA	CC	CU	GA	GG	UC	UU	gap	Seq
T	2.3*	3.7*	4.7*	0.2*	0.3	2.2	1.3	1.9	0.6	0.8	1.3	0.5	0.8	0.1	0.7	2.6	76.1	872
3	2.9	6.0*	7.5*	0.4	0.4*	3.5	1.7	3.1*	1	1.2	2.1	0.8	1.4	0.2	1.2	3.9	62.9	518
B	6.9*	26.1*	26.8*	18.8*	0.4	5.1	0.7	--	--	--	--	--	0.7	--	--	0.4	14.2	276
A	33.3*	30.6*	8.3*	--	--	2.8	--	--	--	--	5.6	--	5.6	--	13.9	--	--	36
C	1.0*	1.0*	2.0*	--	--	--	2	1	--	1	--	--	--	--	--	1	91	100
E	0.5	2.9*	15.7*	0.5	1.0*	--	3.4	7.8*	1	2.9	4.4	2	0.5	0.5	0.5	9.8	46.6	204
M	1.6*	--	--	--	0.4	0.4	--	--	--	--	--	--	--	--	--	0.8*	96.9	254
Collective Score
Aln	Xch	Ych	PE	PES	Cov1	Cov3	C1+C3	WC	WCGU	XCons	YCons	DfDel	PNuc	Seq
T	32	17	4	0.16	0.32	0.46	0.78	0.46	0.56	-0.97	-0.85	0.16	0.2	872
3	27	14	4	0.2	0.32	0.46	0.78	0.45	0.56	-0.9	-0.96	0.22	0.3	518
B	8	2	1	0.2	0.88	0.92	1.79	0.92	0.98	-0.36	-0.38	0.01	0.73	276
A	4	4	1	0.25	0.58	0.72	1.31	0.72	0.75	0.44	0.59	0	0.88	36
C	5	2	0	0	0.43	0.56	0.98	0.44	0.44	-0.85	-0.64	0.32	0.09	100
E	15	8	2	0.17	0.31	0.51	0.82	0.37	0.39	-0.64	-0.88	0.13	0.41	204
M	0	1	0	0	0.5	0.75	1.25	0.5	0.75	-0.23	-0.3	0.01	0.03	254
Helix 18	Base Pair (281:359)		BPC: cWW	AI: --	Weak
Frequency
Aln	GC	CG	UA	AU	GU	UG	AA	AC	AG	CA	CC	CU	GA	GG	UC	UU	gap	Seq
T	6.2	5.6*	3.1*	7.4	4.5*	2.8	1.6	7.5*	0.8	0.6	0.9	2	0.7	1.5	0.7	2.5	51.7	869
3	9.7	8.5*	3.5*	8.5	7.4*	4.1	1.9	12.4*	1.4	0.6	1.6	3.1	0.6	2.3	0.6	2.5	31.4	516
B	9.1	9.4*	3.3*	15.2	12.3*	7.6	3.6	22.8*	2.5	--	1.4	1.4	1.1	2.9	0.4	5.1	1.9	276
A	19.4*	33.3*	25.0*	8.3*	5.6	--	--	--	--	--	2.8	--	--	--	5.6	--	--	36
C	4.0*	1.0*	6.1*	17.2*	1	2	2	1	--	2	--	--	3	1	2	9.1	48.3	99
E	8.8*	3.4	--	1	1	--	--	--	--	1.5	1.5	5.9*	--	2.5	--	0.5	74	204
M	--	1.6*	1.2*	1.2*	--	0.4	0.8	--	--	--	--	0.4	--	--	0.4	--	94.1	254
Collective Score
Aln	Xch	Ych	PE	PES	Cov1	Cov3	C1+C3	WC	WCGU	XCons	YCons	DfDel	PNuc	Seq
T	41	56	13	0.27	0.32	0.43	0.75	0.46	0.61	-0.97	-0.87	0.09	0.4	869
3	26	44	9	0.26	0.34	0.46	0.81	0.44	0.61	-0.79	-0.35	0.14	0.56	516
B	15	22	5	0.27	0.33	0.49	0.82	0.38	0.58	0.08	0.03	0.01	0.83	276
A	5	5	3	0.6	0.79	0.86	1.65	0.86	0.92	0.15	0.06	0	0.88	36
C	14	9	3	0.26	0.32	0.55	0.87	0.55	0.61	-0.8	-0.62	0.05	0.49	99
E	6	17	1	0.09	0.34	0.57	0.91	0.51	0.55	-0.73	-0.56	0.35	0.2	204
M	1	3	1	0.5	0.55	0.67	1.21	0.67	0.73	-0.35	-0.35	0	0.05	254
Helix 18	Base Pair (282:358)		BPC: cWW	AI: --	Strong
Frequency
Aln	GC	CG	UA	AU	GU	UG	AA	AC	AG	CA	CC	CU	GA	GG	UC	UU	gap	Seq
T	3	1.8	4.1*	6.2	0.8	0.9	2	16.9*	4.1	0.5	1.1	2.6*	0.9	1.5*	1.7	1.6	50.2	870
3	4.8	2.9	5.8*	7.4	0.8	1.2	2.1	26.9*	6.6	0.6	1.9	3.9*	1.2	2.3*	1.7	0.4	29.7	517
B	2.9	2.2*	5.1*	10.8	0.4*	1.1	3.6	51.6*	11.9	0.4	2.9	1.4	2.2	0.7	1.1	--	1.9	277
A	30.6*	13.9*	22.2*	11.1*	5.6	--	--	2.8	--	--	--	5.6	--	5.6	--	--	2.8	36
C	1	1.0*	5.1	13.1*	2	2	5.1	4	1	1	--	1	2.0*	1	6.1*	11.1	43.4	99
E	2.9	2	3.9*	0.5	0.5	1.5	0.5	0.5*	--	1	1	6.9*	--	3.9*	2.9	1	71.1	204
M	--	--	0.4*	1.2	0.4	--	0.4	1.6*	0.4	--	--	0.8*	--	--	--	0.4	94.5	254
Collective Score
Aln	Xch	Ych	PE	PES	Cov1	Cov3	C1+C3	WC	WCGU	XCons	YCons	DfDel	PNuc	Seq
T	45	65	24	0.44	0.25	0.51	0.76	0.3	0.34	-0.81	-0.89	0.1	0.41	870
3	29	46	20	0.53	0.28	0.55	0.83	0.3	0.32	-0.56	-0.27	0.16	0.58	517
B	18	21	13	0.67	0.16	0	0.16	0.21	0.23	0.81	0.34	0.01	0.83	277
A	4	4	4	1	0.71	0.8	1.51	0.8	0.86	-0.06	0.03	0.02	0.85	36
C	13	17	3	0.2	0.21	0.39	0.6	0.36	0.43	-0.67	-0.61	0.08	0.54	99
E	7	21	3	0.21	0.38	0.53	0.9	0.32	0.39	-0.84	-0.43	0.39	0.22	204
M	3	2	1	0.4	0.3	0.5	0.8	0.29	0.36	-0.33	-0.35	0	0.04	254
Helix 18	Base Pair (283:357)		BPC: cWW	AI: --	Strong
Frequency
Aln	GC	CG	UA	AU	GU	UG	AA	AC	AG	CA	CC	CU	GA	GG	UC	UU	gap	Seq
T	3.1*	3.7*	10.9*	8.6*	6.1	1	1.8	1.3	1.4	0.9	1.7	0.9	1.6	1.5	1.7	1.6	51.9	868
3	5.2*	6.2*	16.5*	12.0*	8.9	1.4	1	1.6	1.6	1.4	2.1	1.2	2.1	2.5	2.5	1.2	32.7	515
B	5.8*	2.5*	25.7*	19.6*	15.6	2.2	0.7	3.3	1.4	1.8	2.9	1.1	2.9	2.9	2.2	1.1	8.4	276
A	22.2*	33.3*	19.4*	2.8*	--	--	--	--	5.6	--	--	5.6	2.8	5.6	2.8	--	--	36
C	--	--	10.1*	9.1*	3	2	9.1	3	2	1	3.0*	1	3	--	2	6.1	45.4	99
E	2.0*	6.4*	3.4*	5.4*	1	0.5	1.5	0.5	1	1	1.5	0.5	1	1.5	3	1.5	68.5	203
M	--	--	--	1.6*	1.6	--	0.8	--	0.8	--	0.4*	0.4	--	--	--	0.8	93.7	254
Collective Score
Aln	Xch	Ych	PE	PES	Cov1	Cov3	C1+C3	WC	WCGU	XCons	YCons	DfDel	PNuc	Seq
T	62	66	27	0.42	0.42	0.55	0.96	0.55	0.7	-0.96	-0.92	0.06	0.4	868
3	44	48	20	0.43	0.46	0.59	1.05	0.59	0.75	-0.76	-0.47	0.1	0.55	515
B	27	23	13	0.52	0.42	0.58	1.01	0.58	0.78	0.07	-0.22	0.06	0.78	276
A	7	8	5	0.67	0.67	0.78	1.44	0.78	0.78	0.17	0.2	0	0.88	36
C	16	15	6	0.39	0.27	0.41	0.68	0.35	0.44	-0.73	-0.79	0.02	0.52	99
E	10	17	2	0.15	0.43	0.55	0.98	0.55	0.59	-0.97	-0.52	0.36	0.24	203
M	2	3	1	0.4	0.08	0	0.08	0.25	0.5	-0.37	-0.35	0	0.05	254
Helix 18	Base Pair (284:356)		BPC: cWW	AI: --	Weak
Frequency
Aln	GC	CG	UA	AU	GU	UG	AA	AC	AG	CA	CC	CU	GA	GG	UC	UU	gap	Seq
T	5.7*	15.1*	4.4*	6.3*	3.4	3.8	2.8	4.3	1.5	1.6	2.1	0.8	0.7	1.4	3.7	4.1	38.3	870
3	9.5*	24.2*	5.0*	8.3*	5.4	4.3	1.9	6.2	2.1	2.1	2.9	1.4	0.8	1.7	5.2	4.8	14.2	517
[truncated: 14,530 more rows]
